# Supplementary material
Source: MDPI journal article supplement (https://www.mdpi.com/2073-4352/13/1/149)
Supplement: s1 [file s1]

Archive with 3 entries (3 files):
- CuI_TT_Py_checkcif.pdf
- CuI_TT_Py_edit.cif
- Supporting Information Crystals_revised.pdf
