# Supplementary material
Source: MDPI journal article supplement (https://www.mdpi.com/2073-4352/13/1/149)
Supplement: s1 [file s1]

# **A rare structural motif for a luminescent Cu(I) coordination polymer with 3-(pyridin-2-yl)triimidazotriazine**

**Daniele Malpicci <sup>1,2</sup>, Delia Blasi <sup>1</sup>, Daniele Marinotto <sup>2,3</sup>, Alessandra Forni <sup>2,3\*</sup>, Elena Cariati <sup>1,2,3</sup>, Elena Lucenti <sup>2,3</sup> and Lucia Carlucci <sup>1,3\*</sup>**

<sup>1</sup> Department of Chemistry, Università degli Studi di Milano, via Golgi 19, 20133 Milano, Italy

<sup>2</sup> Institute of Chemical Sciences and Technologies "Giulio Natta" (SCITEC) of CNR, via Golgi 19, 20133 Milano, Italy

<sup>3</sup> INSTM Research Unit of Milano, via Golgi 19, 20133 Milano, Italy

\* Correspondence: alessandra.forni@scitec.cnr.it (A.F.); lucia.carlucci@unimi.it (L.C.)

## **SUPPORTING INFORMATION**

**Table S1** Crystal data, data collection and refinement details for **1**.

| <b>1</b>                                                        |                                                                              |
|-----------------------------------------------------------------|------------------------------------------------------------------------------|
| <i>Crystal data</i>                                             |                                                                              |
| Chemical formula                                                | C <sub>14</sub> H <sub>9</sub> Cu <sub>2</sub> I <sub>2</sub> N <sub>7</sub> |
| <i>M<sub>r</sub></i> [g mol <sup>-1</sup> ]                     | 656.16                                                                       |
| Crystal system                                                  | monoclinic                                                                   |
| Space group                                                     | <i>P</i> 2 <sub>1</sub> / <i>n</i> (No. 14)                                  |
| Temperature [K]                                                 | 293(2)                                                                       |
| <i>a</i> [Å]                                                    | 4.2715(4)                                                                    |
| <i>b</i> [Å]                                                    | 18.1144(19)                                                                  |
| <i>c</i> [Å]                                                    | 21.199(2)                                                                    |
| β [°]                                                           | 94.098(2)                                                                    |
| <i>V</i> [Å <sup>3</sup> ]                                      | 1636.1(3)                                                                    |
| <i>Z</i>                                                        | 4                                                                            |
| μ(Mo Kα) [mm <sup>-1</sup> ]                                    | 6.387                                                                        |
| Crystal size [mm]                                               | 0.200 × 0.040 × 0.020                                                        |
| <i>Data collection</i>                                          |                                                                              |
| <i>T</i> <sub>min</sub> , <i>T</i> <sub>max</sub>               | 0.743, 0.880                                                                 |
| No. of measured reflections                                     | 20443                                                                        |
| No. of independent reflections                                  | 3303                                                                         |
| No. of observed reflections                                     | 2422                                                                         |
| [ <i>I</i> > 2σ( <i>I</i> )]                                    |                                                                              |
| <i>R</i> <sub>int</sub>                                         | 0.0720                                                                       |
| <i>R</i> <sub>σ</sub>                                           | 0.0550                                                                       |
| (sin θ/λ) <sub>max</sub> [Å <sup>-1</sup> ]                     | 0.600                                                                        |
| <i>Refinement</i>                                               |                                                                              |
| <i>R</i> [ <i>F</i> <sup>2</sup> > 2σ( <i>F</i> <sup>2</sup> )] | 0.0431                                                                       |
| <i>wR</i> ( <i>F</i> <sup>2</sup> )                             | 0.0704                                                                       |
| <i>S</i>                                                        | 1.081                                                                        |
| No. of reflections                                              | 3303                                                                         |
| No. of parameters                                               | 226                                                                          |
| No. of restraints                                               | 0                                                                            |
| Δρ <sub>max</sub> , Δρ <sub>min</sub> (e Å <sup>-3</sup> )      | 0.126, -0.869                                                                |

**Table S2** Selected bond distances [Å] and angles [°] for coordination network **1**.

| <b>1</b>      |            |             |            |
|---------------|------------|-------------|------------|
| Cu1–N1        | 2.028(5)   | Cu2–N3      | 2.075(5)   |
| Cu1–I1        | 2.7555(9)  | Cu2–N7      | 2.059(5)   |
| Cu1–I1#1      | 2.6185(10) | Cu2–I2      | 2.6400(9)  |
| Cu1–I1#2      | 2.6501(10) | Cu2–I2#4    | 2.5439(9)  |
| N1–Cu1–I1     | 102.45(14) | N7–Cu2–N3   | 95.8(2)    |
| N1–Cu1–I1#1   | 112.64(14) | N7–Cu2–I2#4 | 119.34(15) |
| N1–Cu1–I1#2   | 115.58(14) | N3–Cu2–I2#4 | 114.19(14) |
| I1#1–Cu1–I1#2 | 116.76(3)  | N7–Cu2–I2   | 114.03(14) |
| I1#1–Cu1–I1   | 105.25(3)  | N7–Cu2–I2   | 114.03(14) |
| I1#2–Cu1–I1   | 101.71(3)  | I2#4–Cu2–I2 | 110.96(3)  |

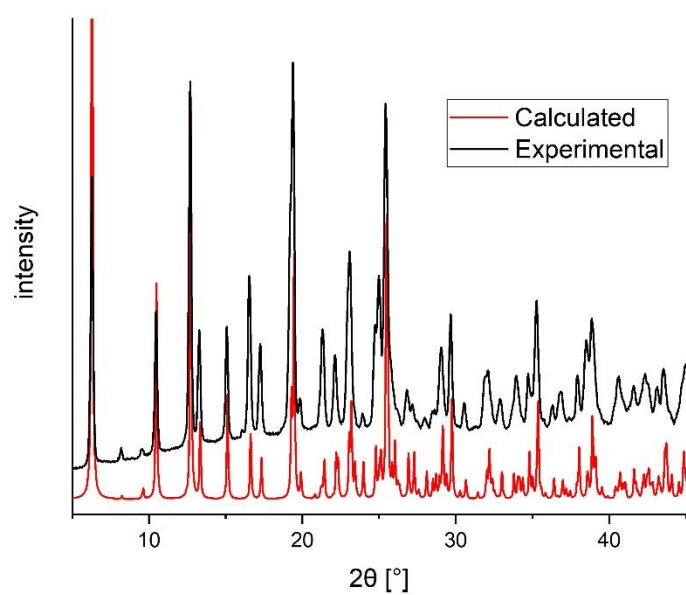

**Figure S1.** Simulated and experimental XRPD patterns of **1**.

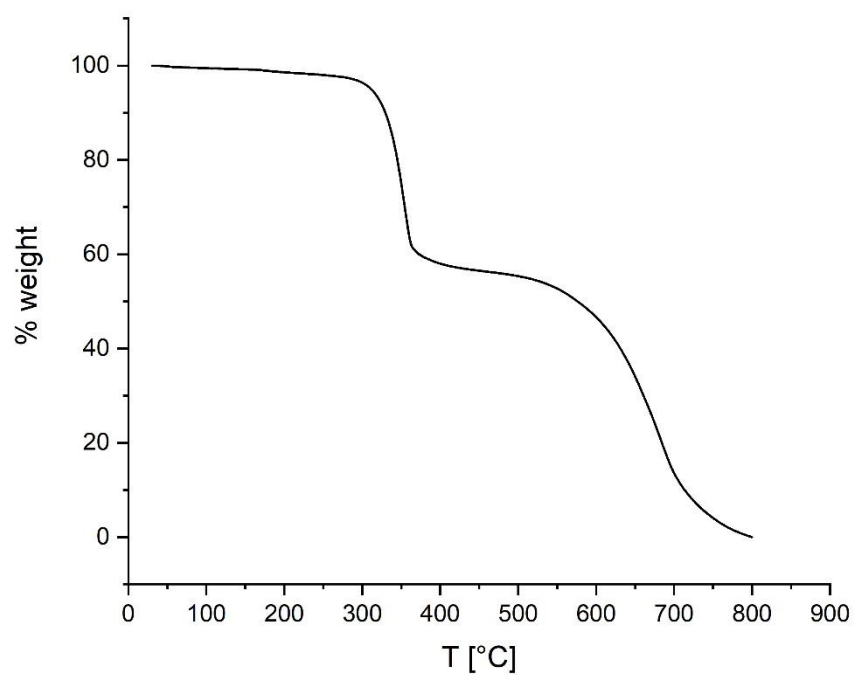

**Figure S2.** TGA analysis of **1**.

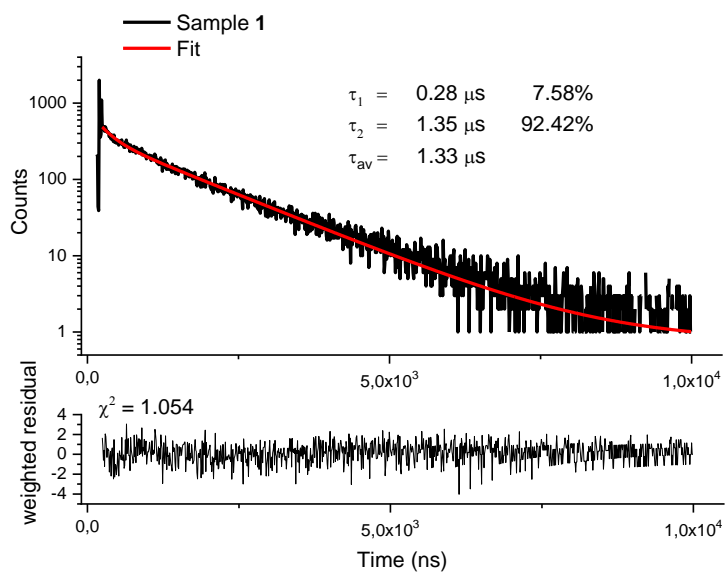

**Figure S3.** Lifetime measurement ( $\lambda_{exc} = 374 \text{ nm}$ ,  $\lambda_{em} = 588 \text{ nm}$ ) of **1** microcrystalline powders at 298 K.

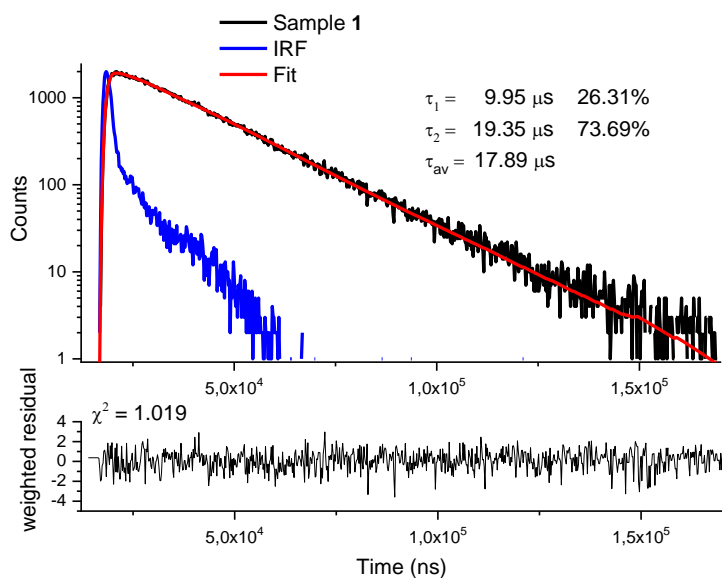

**Figure S4.** Lifetime measurement ( $\lambda_{exc} = 374 \text{ nm}$ ,  $\lambda_{em} = 580 \text{ nm}$ ) of **1** microcrystalline powders at 77 K.

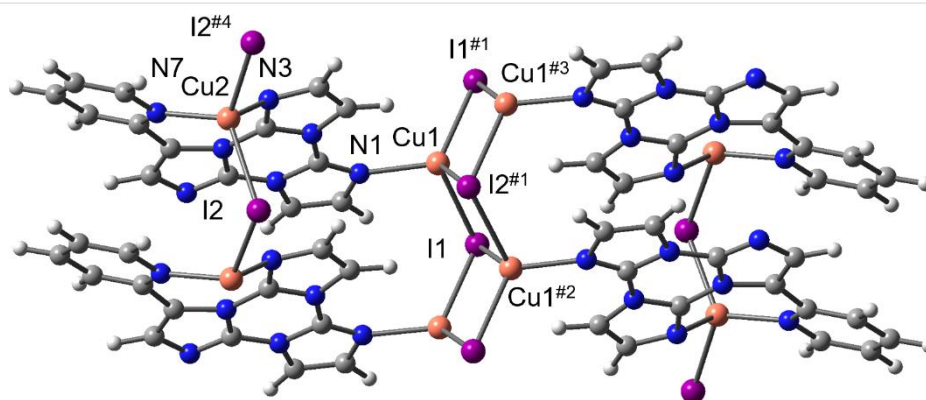

**Figure S5.** Model compound of  $[\text{Cu}_2\text{I}_2(\text{TT-Py})]_n$  with labelling scheme.

**Table S3** Selected optimized bond distances [ $\text{\AA}$ ] for the model compound of  $[\text{Cu}_2\text{I}_2(\text{TT-Py})]_n$  (in parentheses the corresponding X-ray values).

|                       |                  |                      |                  |
|-----------------------|------------------|----------------------|------------------|
| Cu1–Cu1 <sup>#3</sup> | 2.783 [2.762(1)] | Cu2–N3               | 2.100 [2.075(5)] |
| Cu1–Cu1 <sup>#2</sup> | 3.529 [3.413(1)] | Cu2–N7               | 2.094 [2.059(5)] |
| Cu1–N1                | 2.121 [2.028(5)] | Cu2–I2               | 2.830 [2.640(1)] |
| Cu1–I1                | 2.784 [2.755(1)] | Cu2–I2 <sup>#4</sup> | 2.594 [2.544(1)] |
| Cu1–I1 <sup>#1</sup>  | 2.610 [2.618(1)] |                      |                  |
| Cu1–I1 <sup>#2</sup>  | 2.661 [2.650(1)] |                      |                  |

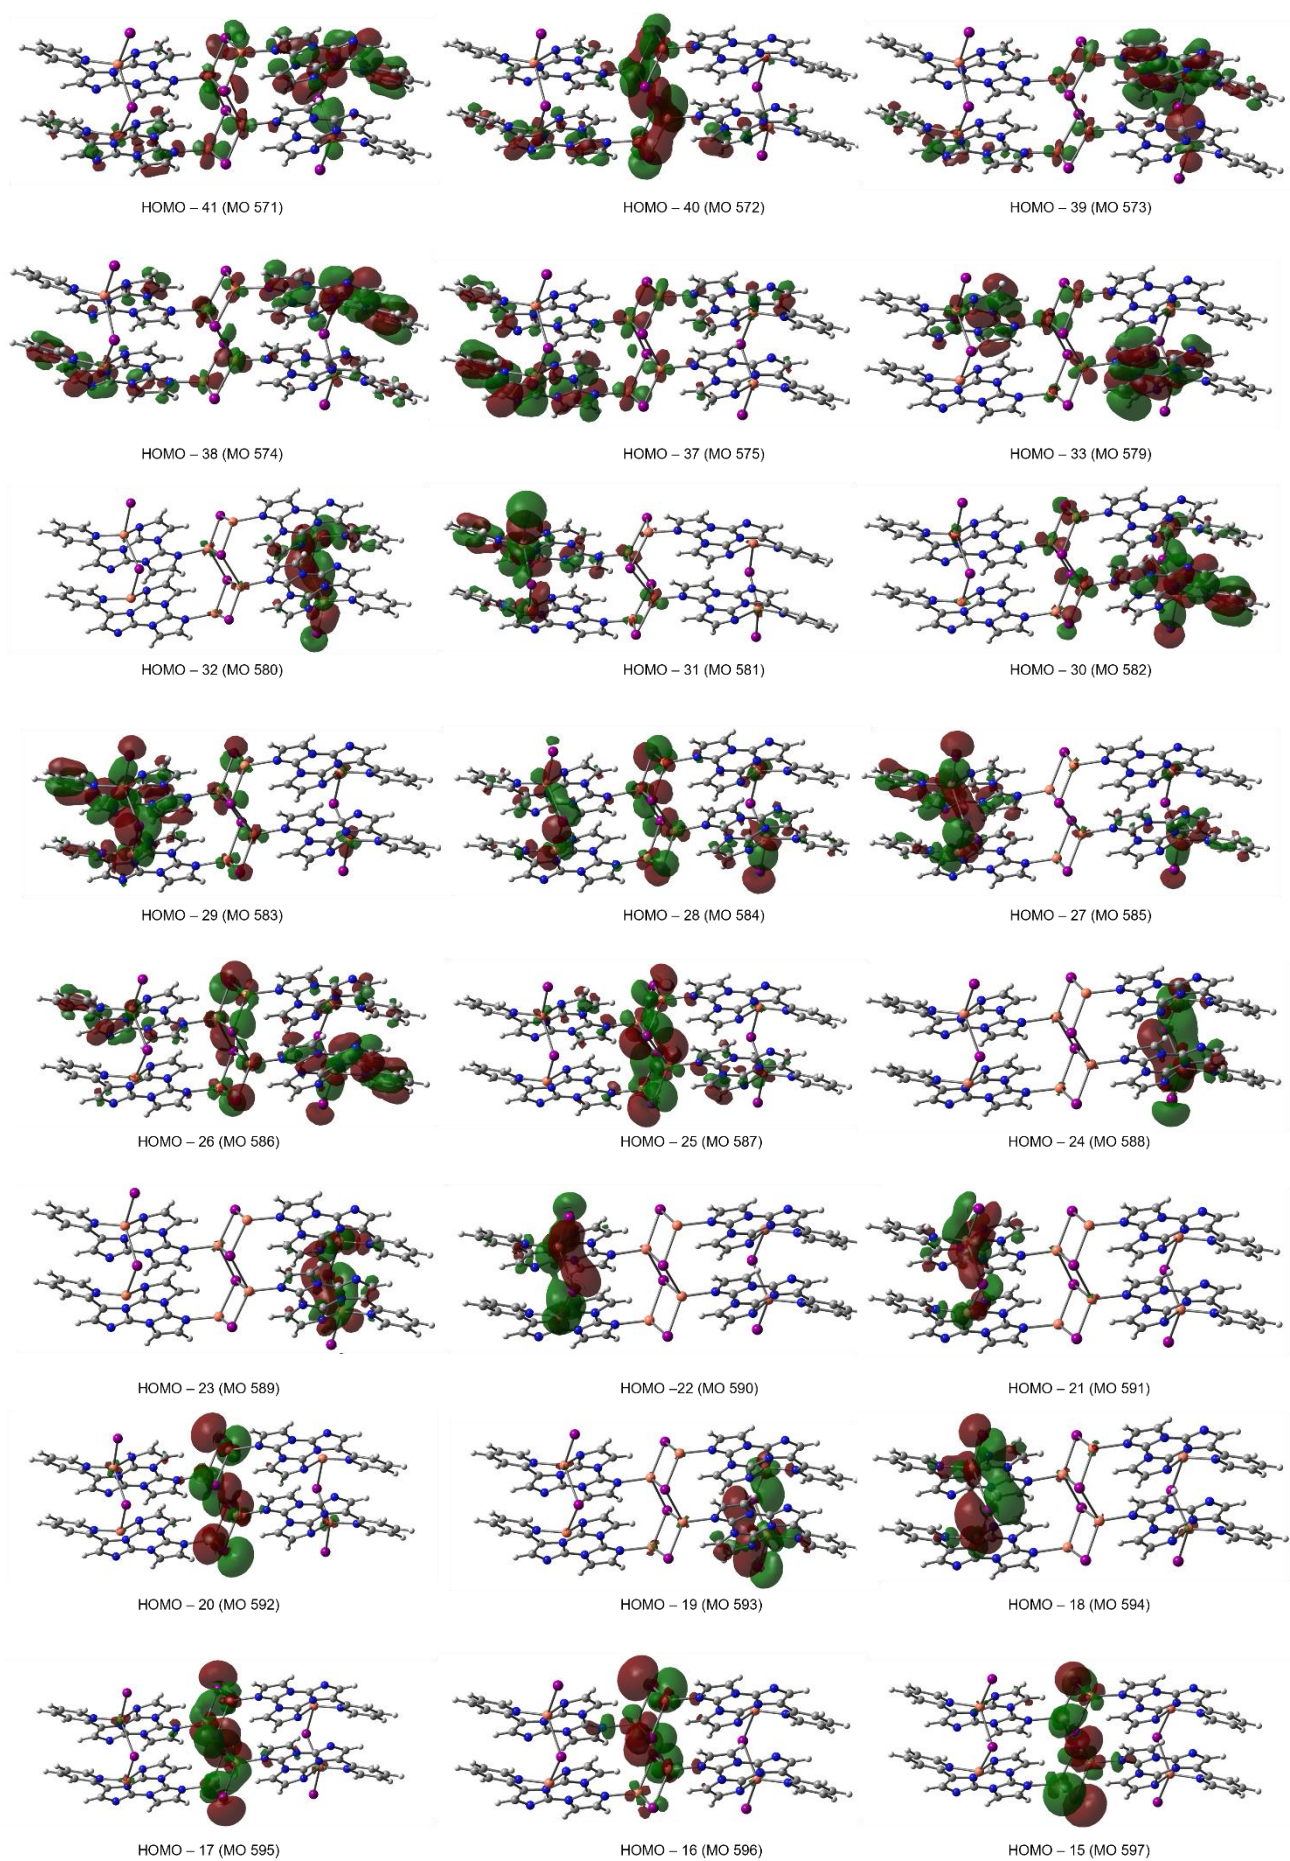



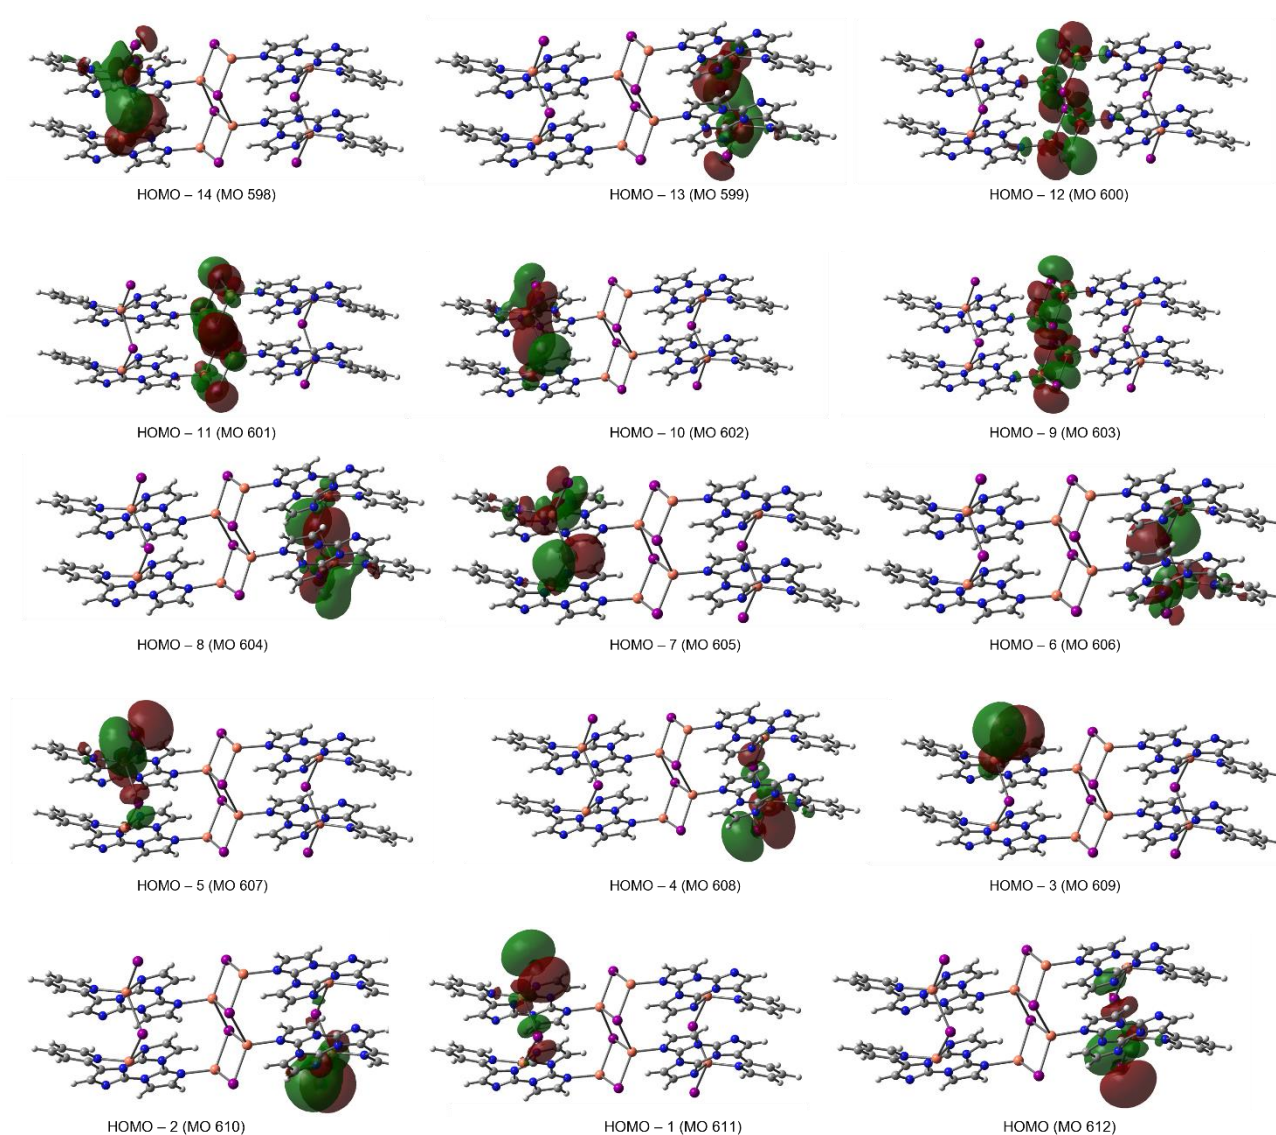

**Figure S6.** Plots of the  $\omega$ B97X/6-311++G(d,p) HOMOs mainly involved in the lowest energy singlet transitions of the model compound of  $[\text{Cu}_2\text{L}_2(\text{TT-Py})]_n$  (Isosurfaces value 0.02).

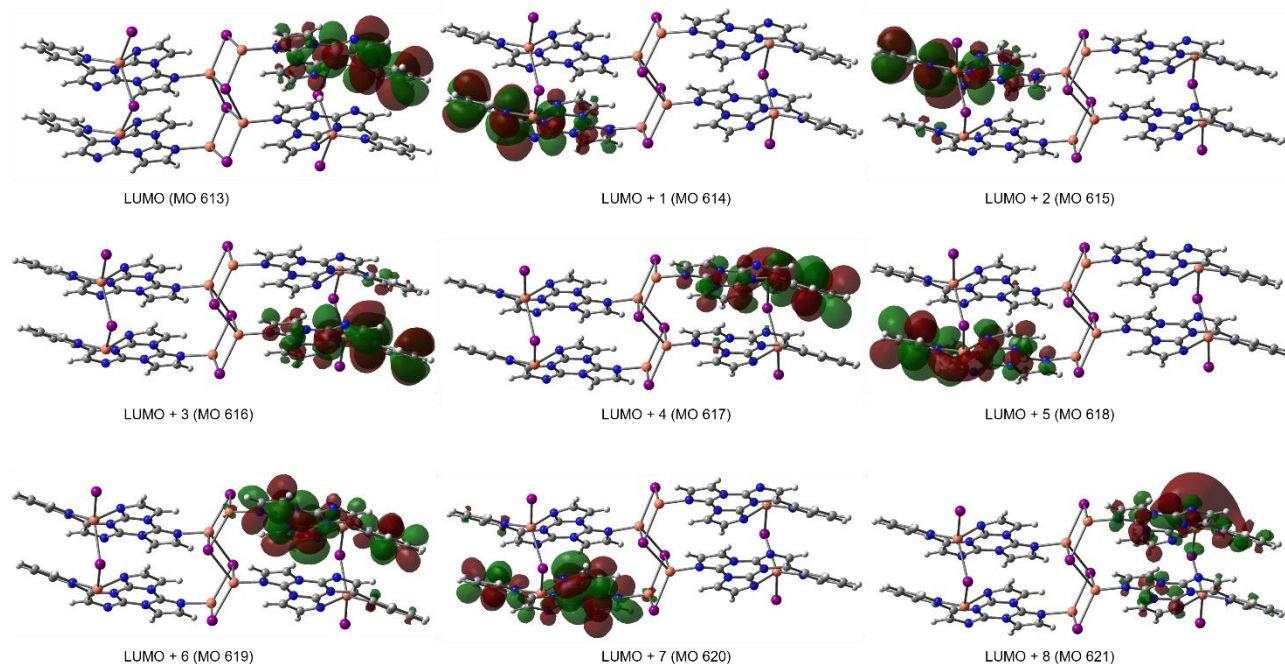

**Figure S7.** Plots of the  $\omega$ B97X/6-311++G(d,p) HOMOs mainly involved in the lowest energy singlet transitions of the model compound of  $[\text{Cu}_2\text{I}_2(\text{TT-Py})]_n$  (Isosurfaces value 0.02).

**Table S4** First TD- $\omega$ B97X/6-311++G(d,p)  $S_0 \rightarrow S_n$  transitions computed for the optimized geometry of the model compound of  $[\text{Cu}_2\text{I}_2(\text{TT-Py})]_n$ .

|               |            |           |           |           |          |              |
|---------------|------------|-----------|-----------|-----------|----------|--------------|
| Excited State | 1:         | Singlet-A | 3.3288 eV | 372.46 nm | f=0.0073 | <S**2>=0.000 |
|               | 593 -> 616 | 0.13367   |           |           |          |              |
|               | 604 -> 616 | 0.13546   |           |           |          |              |
|               | 606 -> 616 | -0.29873  |           |           |          |              |
|               | 610 -> 616 | 0.30632   |           |           |          |              |
|               | 612 -> 616 | 0.39031   |           |           |          |              |
| Excited State | 2:         | Singlet-A | 3.3434 eV | 370.83 nm | f=0.0042 | <S**2>=0.000 |
|               | 594 -> 615 | 0.13934   |           |           |          |              |
|               | 598 -> 615 | -0.14990  |           |           |          |              |
|               | 605 -> 615 | 0.34113   |           |           |          |              |
|               | 609 -> 615 | 0.39130   |           |           |          |              |
|               | 611 -> 615 | 0.28786   |           |           |          |              |
| Excited State | 3:         | Singlet-A | 3.3703 eV | 367.88 nm | f=0.0063 | <S**2>=0.000 |
|               | 580 -> 617 | 0.13865   |           |           |          |              |
|               | 580 -> 621 | 0.16013   |           |           |          |              |
|               | 589 -> 613 | -0.11317  |           |           |          |              |
|               | 589 -> 617 | -0.17740  |           |           |          |              |
|               | 589 -> 621 | -0.20684  |           |           |          |              |
|               | 599 -> 617 | -0.13567  |           |           |          |              |
|               | 599 -> 621 | -0.15665  |           |           |          |              |
| Excited State | 4:         | Singlet-A | 3.4531 eV | 359.05 nm | f=0.0071 | <S**2>=0.000 |
|               | 606 -> 616 | -0.18922  |           |           |          |              |
|               | 608 -> 613 | 0.10372   |           |           |          |              |
|               | 608 -> 616 | 0.52345   |           |           |          |              |
|               | 608 -> 627 | 0.13216   |           |           |          |              |
|               | 610 -> 616 | -0.24571  |           |           |          |              |
| Excited State | 5:         | Singlet-A | 3.4698 eV | 357.33 nm | f=0.0062 | <S**2>=0.000 |
|               | 581 -> 615 | 0.10149   |           |           |          |              |
|               | 605 -> 615 | 0.11288   |           |           |          |              |
|               | 607 -> 614 | 0.12502   |           |           |          |              |
|               | 607 -> 615 | 0.48623   |           |           |          |              |
|               | 609 -> 615 | -0.21291  |           |           |          |              |
|               | 611 -> 615 | 0.12400   |           |           |          |              |



|               |     |           |           |           |          |              |
|---------------|-----|-----------|-----------|-----------|----------|--------------|
| Excited State | 6:  | Singlet-A | 3.4852 eV | 355.74 nm | f=0.0062 | <S**2>=0.000 |
| 591 -> 618    |     | -0.11019  |           |           |          |              |
| 591 -> 622    |     | 0.10372   |           |           |          |              |
| 598 -> 614    |     | 0.12973   |           |           |          |              |
| 598 -> 618    |     | 0.15453   |           |           |          |              |
| 598 -> 622    |     | -0.14646  |           |           |          |              |
| 598 -> 646    |     | -0.10664  |           |           |          |              |
| 605 -> 614    |     | 0.11088   |           |           |          |              |
| 605 -> 618    |     | 0.10820   |           |           |          |              |
| 605 -> 622    |     | -0.10355  |           |           |          |              |
| 607 -> 615    |     | 0.22944   |           |           |          |              |
| 609 -> 615    |     | -0.13479  |           |           |          |              |
|               |     |           |           |           |          |              |
| Excited State | 7:  | Singlet-A | 3.5756 eV | 346.75 nm | f=0.0042 | <S**2>=0.000 |
| 604 -> 616    |     | 0.20274   |           |           |          |              |
| 606 -> 616    |     | 0.26658   |           |           |          |              |
| 610 -> 616    |     | -0.32439  |           |           |          |              |
| 612 -> 613    |     | 0.11269   |           |           |          |              |
| 612 -> 616    |     | 0.42209   |           |           |          |              |
|               |     |           |           |           |          |              |
| Excited State | 8:  | Singlet-A | 3.6267 eV | 341.87 nm | f=0.0021 | <S**2>=0.000 |
| 545 -> 621    |     | -0.13155  |           |           |          |              |
| 580 -> 621    |     | 0.11901   |           |           |          |              |
| 588 -> 617    |     | -0.12984  |           |           |          |              |
| 588 -> 621    |     | -0.15788  |           |           |          |              |
| 593 -> 617    |     | -0.11330  |           |           |          |              |
| 593 -> 621    |     | -0.13397  |           |           |          |              |
| 604 -> 613    |     | 0.11040   |           |           |          |              |
| 604 -> 617    |     | 0.13262   |           |           |          |              |
| 604 -> 621    |     | 0.14756   |           |           |          |              |
|               |     |           |           |           |          |              |
| Excited State | 9:  | Singlet-A | 3.6420 eV | 340.43 nm | f=0.0034 | <S**2>=0.000 |
| 602 -> 615    |     | -0.16889  |           |           |          |              |
| 605 -> 615    |     | -0.20476  |           |           |          |              |
| 607 -> 615    |     | -0.18295  |           |           |          |              |
| 609 -> 615    |     | -0.20111  |           |           |          |              |
| 611 -> 614    |     | 0.13015   |           |           |          |              |
| 611 -> 615    |     | 0.49425   |           |           |          |              |
|               |     |           |           |           |          |              |
| Excited State | 10: | Singlet-A | 3.7911 eV | 327.04 nm | f=0.0008 | <S**2>=0.000 |
| 590 -> 618    |     | 0.11673   |           |           |          |              |
| 590 -> 622    |     | -0.11928  |           |           |          |              |
| 594 -> 614    |     | -0.16082  |           |           |          |              |
| 594 -> 618    |     | -0.15422  |           |           |          |              |
| 594 -> 622    |     | 0.14658   |           |           |          |              |
| 594 -> 646    |     | 0.10365   |           |           |          |              |
| 602 -> 614    |     | -0.16140  |           |           |          |              |
| 602 -> 618    |     | -0.15403  |           |           |          |              |
| 602 -> 622    |     | 0.13892   |           |           |          |              |
| 605 -> 614    |     | 0.11083   |           |           |          |              |
|               |     |           |           |           |          |              |
| Excited State | 11: | Singlet-A | 3.8067 eV | 325.70 nm | f=0.0027 | <S**2>=0.000 |
| 599 -> 613    |     | -0.11847  |           |           |          |              |
| 608 -> 613    |     | -0.25119  |           |           |          |              |
| 610 -> 613    |     | 0.23715   |           |           |          |              |
| 612 -> 613    |     | 0.46846   |           |           |          |              |
| 612 -> 616    |     | -0.10046  |           |           |          |              |
| 612 -> 617    |     | 0.10071   |           |           |          |              |
|               |     |           |           |           |          |              |
| Excited State | 12: | Singlet-A | 3.9087 eV | 317.20 nm | f=0.0042 | <S**2>=0.000 |
| 583 -> 614    |     | 0.12142   |           |           |          |              |
| 591 -> 614    |     | -0.12509  |           |           |          |              |
| 598 -> 614    |     | 0.17506   |           |           |          |              |
| 605 -> 614    |     | 0.12074   |           |           |          |              |
| 607 -> 614    |     | -0.29027  |           |           |          |              |
| 609 -> 614    |     | 0.24697   |           |           |          |              |
| 611 -> 614    |     | 0.34073   |           |           |          |              |

**Table S5** First TD- $\omega$ B97X/6-311++G(d,p)  $T_0 \rightarrow T_n$  transitions computed for the optimized geometry of the model compound of  $[\text{Cu}_2\text{I}_2(\text{TT-Py})]_n$ .

|               |    |           |           |           |      |              |
|---------------|----|-----------|-----------|-----------|------|--------------|
| Excited State | 1: | Triplet-A | 3.0016 eV | 413.06 nm | f=nd | <S**2>=2.000 |
| 568 -> 614    |    | -0.11137  |           |           |      |              |

|                  |           |           |           |      |              |  |
|------------------|-----------|-----------|-----------|------|--------------|--|
| 571 -> 614       | 0.10473   |           |           |      |              |  |
| 572 -> 614       | -0.17011  |           |           |      |              |  |
| 573 -> 614       | 0.14872   |           |           |      |              |  |
| 574 -> 614       | -0.21666  |           |           |      |              |  |
| 575 -> 614       | -0.35222  |           |           |      |              |  |
| 575 -> 618       | 0.11428   |           |           |      |              |  |
| 583 -> 614       | -0.13154  |           |           |      |              |  |
| 586 -> 614       | 0.11015   |           |           |      |              |  |
| Excited State 2: | Triplet-A | 3.0150 eV | 411.23 nm | f=nd | <S**2>=2.000 |  |
| 566 -> 613       | 0.12472   |           |           |      |              |  |
| 571 -> 613       | 0.22845   |           |           |      |              |  |
| 573 -> 613       | 0.15975   |           |           |      |              |  |
| 574 -> 613       | 0.35952   |           |           |      |              |  |
| 574 -> 617       | -0.11000  |           |           |      |              |  |
| 575 -> 613       | -0.11232  |           |           |      |              |  |
| 582 -> 613       | -0.11841  |           |           |      |              |  |
| 586 -> 613       | 0.15458   |           |           |      |              |  |
| Excited State 3: | Triplet-A | 3.0192 eV | 410.66 nm | f=nd | <S**2>=2.000 |  |
| 537 -> 616       | 0.10263   |           |           |      |              |  |
| 574 -> 613       | -0.12194  |           |           |      |              |  |
| 582 -> 616       | -0.24607  |           |           |      |              |  |
| 584 -> 616       | 0.12564   |           |           |      |              |  |
| 585 -> 616       | 0.15461   |           |           |      |              |  |
| 586 -> 616       | 0.28273   |           |           |      |              |  |
| 588 -> 616       | 0.11689   |           |           |      |              |  |
| 589 -> 616       | 0.10920   |           |           |      |              |  |
| 610 -> 616       | -0.17245  |           |           |      |              |  |
| 612 -> 616       | -0.15059  |           |           |      |              |  |
| Excited State 4: | Triplet-A | 3.0248 eV | 409.90 nm | f=nd | <S**2>=2.000 |  |
| 535 -> 615       | -0.10149  |           |           |      |              |  |
| 575 -> 615       | 0.11459   |           |           |      |              |  |
| 581 -> 615       | -0.19928  |           |           |      |              |  |
| 583 -> 615       | -0.27521  |           |           |      |              |  |
| 585 -> 615       | -0.25189  |           |           |      |              |  |
| 586 -> 615       | 0.18266   |           |           |      |              |  |
| 590 -> 615       | -0.13231  |           |           |      |              |  |
| 591 -> 615       | 0.12075   |           |           |      |              |  |
| 607 -> 615       | 0.10706   |           |           |      |              |  |
| 609 -> 615       | -0.16188  |           |           |      |              |  |
| Excited State 5: | Triplet-A | 3.1485 eV | 393.79 nm | f=nd | <S**2>=2.000 |  |
| 580 -> 617       | 0.15110   |           |           |      |              |  |
| 580 -> 621       | 0.17639   |           |           |      |              |  |
| 589 -> 613       | -0.10336  |           |           |      |              |  |
| 589 -> 617       | -0.17836  |           |           |      |              |  |
| 589 -> 621       | -0.21405  |           |           |      |              |  |
| 599 -> 617       | -0.13033  |           |           |      |              |  |
| 599 -> 621       | -0.15727  |           |           |      |              |  |
| Excited State 6: | Triplet-A | 3.2160 eV | 385.52 nm | f=nd | <S**2>=2.000 |  |
| 588 -> 616       | -0.10346  |           |           |      |              |  |
| 593 -> 616       | -0.14773  |           |           |      |              |  |
| 599 -> 616       | -0.10262  |           |           |      |              |  |
| 604 -> 616       | -0.14239  |           |           |      |              |  |
| 606 -> 616       | 0.38230   |           |           |      |              |  |
| 606 -> 627       | 0.12552   |           |           |      |              |  |
| 608 -> 616       | -0.16776  |           |           |      |              |  |
| 610 -> 616       | -0.19374  |           |           |      |              |  |
| 612 -> 616       | -0.29060  |           |           |      |              |  |
| Excited State 7: | Triplet-A | 3.2179 eV | 385.30 nm | f=nd | <S**2>=2.000 |  |
| 594 -> 615       | 0.14896   |           |           |      |              |  |
| 598 -> 615       | -0.16289  |           |           |      |              |  |
| 602 -> 615       | -0.10127  |           |           |      |              |  |
| 605 -> 615       | 0.37977   |           |           |      |              |  |
| 605 -> 623       | 0.10492   |           |           |      |              |  |
| 607 -> 615       | 0.12084   |           |           |      |              |  |
| 609 -> 615       | 0.29411   |           |           |      |              |  |
| 611 -> 615       | 0.25294   |           |           |      |              |  |
| Excited State 8: | Triplet-A | 3.2829 eV | 377.66 nm | f=nd | <S**2>=2.000 |  |
| 583 -> 618       | 0.10858   |           |           |      |              |  |
| 583 -> 622       | -0.10029  |           |           |      |              |  |
| 585 -> 618       | -0.10381  |           |           |      |              |  |
| 591 -> 618       | -0.12073  |           |           |      |              |  |

|                   |           |           |           |      |              |  |
|-------------------|-----------|-----------|-----------|------|--------------|--|
| 591 -> 622        | 0.11822   |           |           |      |              |  |
| 598 -> 614        | 0.11754   |           |           |      |              |  |
| 598 -> 618        | 0.15859   |           |           |      |              |  |
| 598 -> 622        | -0.15929  |           |           |      |              |  |
| 598 -> 646        | -0.12079  |           |           |      |              |  |
| 605 -> 618        | 0.10436   |           |           |      |              |  |
| Excited State 9:  | Triplet-A | 3.3305 eV | 372.27 nm | f=nd | <S**2>=2.000 |  |
| 545 -> 621        | -0.11898  |           |           |      |              |  |
| 580 -> 617        | 0.11133   |           |           |      |              |  |
| 580 -> 621        | 0.13164   |           |           |      |              |  |
| 588 -> 617        | -0.12902  |           |           |      |              |  |
| 588 -> 621        | -0.16098  |           |           |      |              |  |
| 593 -> 617        | -0.11014  |           |           |      |              |  |
| 593 -> 621        | -0.13400  |           |           |      |              |  |
| 599 -> 621        | 0.10724   |           |           |      |              |  |
| 604 -> 617        | 0.12617   |           |           |      |              |  |
| 604 -> 621        | 0.14762   |           |           |      |              |  |
| Excited State 10: | Triplet-A | 3.3676 eV | 368.17 nm | f=nd | <S**2>=2.000 |  |
| 582 -> 616        | 0.23275   |           |           |      |              |  |
| 606 -> 616        | -0.13803  |           |           |      |              |  |
| 608 -> 616        | 0.42544   |           |           |      |              |  |
| 608 -> 627        | 0.11386   |           |           |      |              |  |
| 610 -> 616        | -0.22398  |           |           |      |              |  |
| 612 -> 616        | -0.22141  |           |           |      |              |  |
| Excited State 11: | Triplet-A | 3.4061 eV | 364.01 nm | f=nd | <S**2>=2.000 |  |
| 581 -> 615        | 0.22372   |           |           |      |              |  |
| 607 -> 615        | 0.49178   |           |           |      |              |  |
| 609 -> 615        | -0.29702  |           |           |      |              |  |
| Excited State 12: | Triplet-A | 3.4975 eV | 354.49 nm | f=nd | <S**2>=2.000 |  |
| 599 -> 616        | 0.11172   |           |           |      |              |  |
| 604 -> 616        | -0.24057  |           |           |      |              |  |
| 606 -> 616        | -0.20118  |           |           |      |              |  |
| 608 -> 616        | -0.14884  |           |           |      |              |  |
| 610 -> 616        | 0.35716   |           |           |      |              |  |
| 612 -> 616        | -0.32550  |           |           |      |              |  |
| Excited State 13: | Triplet-A | 3.5156 eV | 352.67 nm | f=nd | <S**2>=2.000 |  |
| 590 -> 618        | 0.11410   |           |           |      |              |  |
| 590 -> 622        | -0.12414  |           |           |      |              |  |
| 594 -> 614        | -0.12014  |           |           |      |              |  |
| 594 -> 618        | -0.14914  |           |           |      |              |  |
| 594 -> 622        | 0.14664   |           |           |      |              |  |
| 594 -> 646        | 0.11302   |           |           |      |              |  |
| 602 -> 614        | -0.11840  |           |           |      |              |  |
| 602 -> 618        | -0.14666  |           |           |      |              |  |
| 602 -> 622        | 0.14137   |           |           |      |              |  |
| 602 -> 646        | 0.10343   |           |           |      |              |  |
| Excited State 14: | Triplet-A | 3.5597 eV | 348.30 nm | f=nd | <S**2>=2.000 |  |
| 598 -> 615        | 0.11395   |           |           |      |              |  |
| 602 -> 615        | -0.23060  |           |           |      |              |  |
| 605 -> 615        | -0.17158  |           |           |      |              |  |
| 609 -> 615        | -0.20071  |           |           |      |              |  |
| 611 -> 614        | 0.10029   |           |           |      |              |  |
| 611 -> 615        | 0.44232   |           |           |      |              |  |
| Excited State 15: | Triplet-A | 3.7083 eV | 334.35 nm | f=nd | <S**2>=2.000 |  |
| 555 -> 617        | -0.10357  |           |           |      |              |  |
| 555 -> 621        | -0.12349  |           |           |      |              |  |
| 573 -> 617        | 0.10662   |           |           |      |              |  |
| 580 -> 613        | 0.14654   |           |           |      |              |  |
| 589 -> 613        | -0.11302  |           |           |      |              |  |
| 606 -> 621        | 0.10781   |           |           |      |              |  |
| 608 -> 613        | -0.11052  |           |           |      |              |  |
| 612 -> 613        | 0.24268   |           |           |      |              |  |
