# Supplementary material
Source: MDPI journal article supplement (https://www.mdpi.com/2073-4352/13/1/149)
Supplement: s1 [file s1 › CuI_TT_Py_edit.cif]

 
data_shelx
 
_audit_creation_method            'SHELXL-2016/6'
_shelx_SHELXL_version_number      '2016/6'
_chemical_name_systematic         ?
_chemical_name_common             ?
_chemical_melting_point           ?
_chemical_formula_moiety          ?
_chemical_formula_sum
 'C14 H9 Cu2 I2 N7' 
_chemical_formula_weight          656.16

loop_
 _atom_type_symbol
 _atom_type_description
 _atom_type_scat_dispersion_real
 _atom_type_scat_dispersion_imag
 _atom_type_scat_source
 'C'  'C'   0.0033   0.0016
 'International Tables Vol C Tables 4.2.6.8 and 6.1.1.4'
 'H'  'H'   0.0000   0.0000
 'International Tables Vol C Tables 4.2.6.8 and 6.1.1.4'
 'N'  'N'   0.0061   0.0033
 'International Tables Vol C Tables 4.2.6.8 and 6.1.1.4'
 'Cu'  'Cu'   0.3201   1.2651
 'International Tables Vol C Tables 4.2.6.8 and 6.1.1.4'
 'I'  'I'  -0.4742   1.8119
 'International Tables Vol C Tables 4.2.6.8 and 6.1.1.4'
 
_space_group_crystal_system       monoclinic
_space_group_IT_number            14
_space_group_name_H-M_alt         'P 21/n'
_space_group_name_Hall            '-P 2yn'
 
_shelx_space_group_comment
;
The symmetry employed for this shelxl refinement is uniquely defined
by the following loop, which should always be used as a source of
symmetry information in preference to the above space-group names.
They are only intended as comments.
;
 
loop_
 _space_group_symop_operation_xyz
 'x, y, z'
 '-x+1/2, y+1/2, -z+1/2'
 '-x, -y, -z'
 'x-1/2, -y-1/2, z-1/2'
 
_cell_length_a                    4.2715(4)
_cell_length_b                    18.1144(19)
_cell_length_c                    21.199(2)
_cell_angle_alpha                 90
_cell_angle_beta                  94.098(2)
_cell_angle_gamma                 90
_cell_volume                      1636.1(3)
_cell_formula_units_Z             4
_cell_measurement_temperature     293(2)
_cell_measurement_reflns_used     6937
_cell_measurement_theta_min       2.45
_cell_measurement_theta_max       31.44
 
_exptl_crystal_description        needle
_exptl_crystal_colour             yellow
_exptl_crystal_density_meas       ?
_exptl_crystal_density_method     ?
_exptl_crystal_density_diffrn     2.664          
_exptl_crystal_F_000              1224
_exptl_transmission_factor_min    ?
_exptl_transmission_factor_max    ?
_exptl_crystal_size_max           0.200
_exptl_crystal_size_mid           0.04
_exptl_crystal_size_min           0.02
_exptl_absorpt_coefficient_mu     6.387
_shelx_estimated_absorpt_T_min    0.743
_shelx_estimated_absorpt_T_max    0.880
_exptl_absorpt_correction_type    multi-scan
_exptl_absorpt_correction_T_min   0.698
_exptl_absorpt_correction_T_max   0.880
_exptl_absorpt_process_details    SADABS-2012/1
_exptl_absorpt_special_details    ?
_diffrn_ambient_temperature       293(2)
_diffrn_radiation_wavelength      0.71073
_diffrn_radiation_type            MoK\a
_diffrn_source                    'sealed tube'
_diffrn_measurement_device_type   'Bruker APEX II'
_diffrn_measurement_method        '\w scans'
_diffrn_detector_area_resol_mean  ?
_diffrn_reflns_number             20443
_diffrn_reflns_av_unetI/netI      0.0550
_diffrn_reflns_av_R_equivalents   0.0720
_diffrn_reflns_limit_h_min        -5
_diffrn_reflns_limit_h_max        5
_diffrn_reflns_limit_k_min        -22
_diffrn_reflns_limit_k_max        22
_diffrn_reflns_limit_l_min        -26
_diffrn_reflns_limit_l_max        26
_diffrn_reflns_theta_min          1.480
_diffrn_reflns_theta_max          26.370
_diffrn_reflns_theta_full         25.242
_diffrn_measured_fraction_theta_max   0.987
_diffrn_measured_fraction_theta_full  0.993
_diffrn_reflns_Laue_measured_fraction_max    0.987
_diffrn_reflns_Laue_measured_fraction_full   0.993
_diffrn_reflns_point_group_measured_fraction_max   0.987
_diffrn_reflns_point_group_measured_fraction_full  0.993
_reflns_number_total              3303
_reflns_number_gt                 2422
_reflns_threshold_expression      'I > 2\s(I)'
_reflns_Friedel_coverage          0.000
_reflns_Friedel_fraction_max      .
_reflns_Friedel_fraction_full     .
 
_reflns_special_details
;
 Reflections were merged by SHELXL according to the crystal
 class for the calculation of statistics and refinement.
 
 _reflns_Friedel_fraction is defined as the number of unique
 Friedel pairs measured divided by the number that would be
 possible theoretically, ignoring centric projections and
 systematic absences.
;
 
_computing_data_collection        ?
_computing_cell_refinement        ?
_computing_data_reduction         ?
_computing_structure_solution     SIR-2014
_computing_structure_refinement 'SHELXL-2016/6 (Sheldrick, 2016)'
_computing_molecular_graphics     ?
_computing_publication_material   ?
_refine_special_details           ?
_refine_ls_structure_factor_coef  Fsqd
_refine_ls_matrix_type            full
_refine_ls_weighting_scheme       calc
_refine_ls_weighting_details
'w=1/[\s^2^(Fo^2^)+(0.0279P)^2^+0.3180P] where P=(Fo^2^+2Fc^2^)/3'
_atom_sites_solution_primary      ?
_atom_sites_solution_secondary    ?
_atom_sites_solution_hydrogens    geom
_refine_ls_hydrogen_treatment     constr
_refine_ls_extinction_method      none
_refine_ls_extinction_coef        .
_refine_ls_number_reflns          3303
_refine_ls_number_parameters      226
_refine_ls_number_restraints      0
_refine_ls_R_factor_all           0.0718
_refine_ls_R_factor_gt            0.0431
_refine_ls_wR_factor_ref          0.0704
_refine_ls_wR_factor_gt           0.0656
_refine_ls_goodness_of_fit_ref    1.081
_refine_ls_restrained_S_all       1.081
_refine_ls_shift/su_max           0.001
_refine_ls_shift/su_mean          0.000
 
loop_
 _atom_site_label
 _atom_site_type_symbol
 _atom_site_fract_x
 _atom_site_fract_y
 _atom_site_fract_z
 _atom_site_U_iso_or_equiv
 _atom_site_adp_type
 _atom_site_occupancy
 _atom_site_site_symmetry_order  
 _atom_site_calc_flag
 _atom_site_refinement_flags_posn
 _atom_site_refinement_flags_adp
 _atom_site_refinement_flags_occupancy
 _atom_site_disorder_assembly
 _atom_site_disorder_group
C1 C 0.3443(13) 0.2198(3) -0.0130(3) 0.0205(13) Uani 1 1 d . . . . .
C2 C 0.6937(13) 0.1630(3) -0.0893(3) 0.0273(14) Uani 1 1 d . . . . .
H2 H 0.704534 0.113982 -0.076327 0.033 Uiso 1 1 calc R U . . .
C3 C 0.8326(14) 0.1941(3) -0.1375(3) 0.0273(15) Uani 1 1 d . . . . .
H3 H 0.960357 0.168744 -0.163857 0.033 Uiso 1 1 calc R U . . .
C4 C 0.5813(13) 0.2820(3) -0.0984(3) 0.0205(13) Uani 1 1 d . . . . .
C5 C 0.4498(14) 0.4218(3) -0.1033(3) 0.0281(15) Uani 1 1 d . . . . .
C6 C 0.2733(14) 0.4585(4) -0.0622(3) 0.0335(16) Uani 1 1 d . . . . .
H6 H 0.234353 0.508970 -0.064703 0.040 Uiso 1 1 calc R U . . .
C7 C 0.2668(13) 0.3503(3) -0.0296(3) 0.0238(14) Uani 1 1 d . . . . .
C8 C 0.0513(14) 0.2732(4) 0.0547(3) 0.0277(15) Uani 1 1 d . . . . .
H8 H -0.062550 0.307392 0.076456 0.033 Uiso 1 1 calc R U . . .
C9 C 0.0845(14) 0.2005(3) 0.0669(3) 0.0277(15) Uani 1 1 d . . . . .
H9 H -0.003583 0.176215 0.100033 0.033 Uiso 1 1 calc R U . . .
C10 C 0.6148(13) 0.4568(3) -0.1544(3) 0.0250(14) Uani 1 1 d . . . . .
C11 C 0.6739(15) 0.5316(4) -0.1474(3) 0.0367(17) Uani 1 1 d . . . . .
H11 H 0.622425 0.555459 -0.110682 0.044 Uiso 1 1 calc R U . . .
C12 C 0.8078(17) 0.5710(4) -0.1939(4) 0.0453(19) Uani 1 1 d . . . . .
H12 H 0.841915 0.621537 -0.189674 0.054 Uiso 1 1 calc R U . . .
C13 C 0.8897(17) 0.5338(4) -0.2466(4) 0.048(2) Uani 1 1 d . . . . .
H13 H 0.983177 0.558335 -0.278900 0.057 Uiso 1 1 calc R U . . .
C14 C 0.8305(17) 0.4602(4) -0.2503(3) 0.0459(19) Uani 1 1 d . . . . .
H14 H 0.889041 0.435178 -0.285908 0.055 Uiso 1 1 calc R U . . .
N1 N 0.2675(11) 0.1663(3) 0.0237(2) 0.0254(12) Uani 1 1 d . . . . .
N2 N 0.5293(10) 0.2206(3) -0.0631(2) 0.0206(11) Uani 1 1 d . . . . .
N3 N 0.7626(11) 0.2687(3) -0.1431(2) 0.0254(12) Uani 1 1 d . . . . .
N4 N 0.4455(10) 0.3485(2) -0.0814(2) 0.0212(11) Uani 1 1 d . . . . .
N5 N 0.1593(11) 0.4143(3) -0.0169(2) 0.0306(13) Uani 1 1 d . . . . .
N6 N 0.2224(11) 0.2858(3) 0.0031(2) 0.0238(12) Uani 1 1 d . . . . .
N7 N 0.6928(12) 0.4210(3) -0.2059(2) 0.0308(13) Uani 1 1 d . . . . .
Cu1 Cu 0.31305(19) 0.05489(4) 0.02248(4) 0.0379(2) Uani 1 1 d . . . . .
Cu2 Cu 0.66386(19) 0.31191(5) -0.23302(4) 0.0347(2) Uani 1 1 d . . . . .
I1 I -0.18362(9) 0.00902(2) 0.08878(2) 0.02714(12) Uani 1 1 d . . . . .
I2 I 1.15767(9) 0.26397(3) -0.28901(2) 0.03414(14) Uani 1 1 d . . . . .
 
loop_
 _atom_site_aniso_label
 _atom_site_aniso_U_11
 _atom_site_aniso_U_22
 _atom_site_aniso_U_33
 _atom_site_aniso_U_23
 _atom_site_aniso_U_13
 _atom_site_aniso_U_12
C1 0.020(3) 0.019(3) 0.023(3) -0.003(3) 0.004(3) 0.003(3)
C2 0.030(3) 0.018(3) 0.035(4) 0.001(3) 0.005(3) 0.003(3)
C3 0.031(4) 0.027(4) 0.024(4) 0.000(3) 0.005(3) 0.012(3)
C4 0.025(3) 0.023(3) 0.013(3) 0.006(3) -0.001(3) 0.003(3)
C5 0.023(3) 0.021(3) 0.041(4) 0.000(3) 0.006(3) 0.007(3)
C6 0.041(4) 0.021(3) 0.039(4) 0.009(3) 0.004(3) 0.007(3)
C7 0.023(3) 0.027(4) 0.021(3) 0.003(3) 0.003(3) 0.000(3)
C8 0.035(4) 0.030(4) 0.019(3) -0.005(3) 0.009(3) 0.003(3)
C9 0.033(4) 0.030(4) 0.021(3) -0.002(3) 0.009(3) -0.002(3)
C10 0.027(3) 0.019(3) 0.029(4) 0.005(3) 0.002(3) -0.003(3)
C11 0.047(4) 0.030(4) 0.034(4) 0.000(3) 0.005(3) 0.003(3)
C12 0.060(5) 0.023(4) 0.052(5) 0.009(4) -0.002(4) -0.006(4)
C13 0.061(5) 0.036(4) 0.046(5) 0.016(4) 0.009(4) -0.001(4)
C14 0.065(5) 0.038(4) 0.036(5) 0.008(4) 0.013(4) 0.001(4)
N1 0.032(3) 0.025(3) 0.020(3) 0.002(2) 0.003(2) 0.002(2)
N2 0.025(3) 0.019(3) 0.018(3) -0.001(2) 0.005(2) 0.003(2)
N3 0.033(3) 0.026(3) 0.018(3) 0.003(2) 0.008(2) 0.005(2)
N4 0.023(3) 0.019(3) 0.022(3) 0.000(2) 0.001(2) 0.003(2)
N5 0.034(3) 0.024(3) 0.035(3) -0.004(3) 0.013(3) 0.004(3)
N6 0.027(3) 0.023(3) 0.022(3) 0.000(2) 0.009(2) 0.002(2)
N7 0.040(3) 0.026(3) 0.027(3) 0.003(3) 0.004(3) 0.000(3)
Cu1 0.0441(5) 0.0312(5) 0.0395(5) 0.0041(4) 0.0092(4) 0.0066(4)
Cu2 0.0394(5) 0.0361(5) 0.0289(5) 0.0012(4) 0.0053(4) -0.0014(4)
I1 0.0255(2) 0.0289(2) 0.0279(2) 0.00218(19) 0.00742(17) 0.00165(19)
I2 0.0245(2) 0.0477(3) 0.0312(3) -0.0062(2) 0.00907(18) -0.0029(2)
 
_geom_special_details
;
 All esds (except the esd in the dihedral angle between two l.s. planes)
 are estimated using the full covariance matrix.  The cell esds are taken
 into account individually in the estimation of esds in distances, angles
 and torsion angles; correlations between esds in cell parameters are only
 used when they are defined by crystal symmetry.  An approximate (isotropic)
 treatment of cell esds is used for estimating esds involving l.s. planes.
;
 
loop_
 _geom_bond_atom_site_label_1
 _geom_bond_atom_site_label_2
 _geom_bond_distance
 _geom_bond_site_symmetry_2
 _geom_bond_publ_flag
C1 N1 1.300(7) . ?
C1 N6 1.357(7) . ?
C1 N2 1.368(7) . ?
C2 C3 1.341(8) . ?
C2 N2 1.395(7) . ?
C3 N3 1.387(7) . ?
C4 N3 1.289(7) . ?
C4 N2 1.369(7) . ?
C4 N4 1.395(7) . ?
C5 C6 1.366(8) . ?
C5 N4 1.408(7) . ?
C5 C10 1.475(8) . ?
C6 N5 1.365(8) . ?
C7 N5 1.283(7) . ?
C7 N6 1.379(7) . ?
C7 N4 1.383(7) . ?
C8 C9 1.347(8) . ?
C8 N6 1.378(7) . ?
C9 N1 1.391(7) . ?
C10 N7 1.333(7) . ?
C10 C11 1.384(9) . ?
C11 C12 1.375(9) . ?
C12 C13 1.372(10) . ?
C13 C14 1.359(10) . ?
C14 N7 1.348(8) . ?
N1 Cu1 2.028(5) . ?
N3 Cu2 2.075(5) . ?
N7 Cu2 2.059(5) . ?
Cu1 I1 2.6185(10) 1_655 ?
Cu1 I1 2.6501(10) 3 ?
Cu1 I1 2.7555(9) . ?
Cu1 Cu1 2.7625(16) 3_655 ?
Cu2 I2 2.5439(9) 1_455 ?
Cu2 I2 2.6400(9) . ?
 
loop_
 _geom_angle_atom_site_label_1
 _geom_angle_atom_site_label_2
 _geom_angle_atom_site_label_3
 _geom_angle
 _geom_angle_site_symmetry_1
 _geom_angle_site_symmetry_3
 _geom_angle_publ_flag
N1 C1 N6 112.8(5) . . ?
N1 C1 N2 131.0(5) . . ?
N6 C1 N2 116.1(5) . . ?
C3 C2 N2 104.6(5) . . ?
C2 C3 N3 111.7(5) . . ?
N3 C4 N2 112.3(5) . . ?
N3 C4 N4 129.4(5) . . ?
N2 C4 N4 118.3(5) . . ?
C6 C5 N4 103.1(5) . . ?
C6 C5 C10 125.1(6) . . ?
N4 C5 C10 131.7(5) . . ?
N5 C6 C5 113.9(6) . . ?
N5 C7 N6 126.7(5) . . ?
N5 C7 N4 114.5(5) . . ?
N6 C7 N4 118.8(5) . . ?
C9 C8 N6 105.1(5) . . ?
C8 C9 N1 111.4(5) . . ?
N7 C10 C11 120.7(6) . . ?
N7 C10 C5 123.5(5) . . ?
C11 C10 C5 115.7(6) . . ?
C12 C11 C10 120.9(7) . . ?
C13 C12 C11 118.2(7) . . ?
C14 C13 C12 118.2(7) . . ?
N7 C14 C13 124.5(7) . . ?
C1 N1 C9 103.9(5) . . ?
C1 N1 Cu1 134.9(4) . . ?
C9 N1 Cu1 120.6(4) . . ?
C1 N2 C4 123.9(5) . . ?
C1 N2 C2 129.6(5) . . ?
C4 N2 C2 106.5(4) . . ?
C4 N3 C3 104.8(5) . . ?
C4 N3 Cu2 120.7(4) . . ?
C3 N3 Cu2 118.4(4) . . ?
C7 N4 C4 119.3(5) . . ?
C7 N4 C5 105.1(4) . . ?
C4 N4 C5 135.5(5) . . ?
C7 N5 C6 103.4(5) . . ?
C1 N6 C8 106.8(5) . . ?
C1 N6 C7 123.4(5) . . ?
C8 N6 C7 129.7(5) . . ?
C10 N7 C14 117.6(6) . . ?
C10 N7 Cu2 133.0(4) . . ?
C14 N7 Cu2 109.4(5) . . ?
N1 Cu1 I1 112.64(14) . 1_655 ?
N1 Cu1 I1 115.58(14) . 3 ?
I1 Cu1 I1 116.76(3) 1_655 3 ?
N1 Cu1 I1 102.45(14) . . ?
I1 Cu1 I1 105.25(3) 1_655 . ?
I1 Cu1 I1 101.71(3) 3 . ?
N1 Cu1 Cu1 141.18(14) . 3_655 ?
I1 Cu1 Cu1 58.94(3) 1_655 3_655 ?
I1 Cu1 Cu1 57.82(3) 3 3_655 ?
I1 Cu1 Cu1 116.37(5) . 3_655 ?
N7 Cu2 N3 95.8(2) . . ?
N7 Cu2 I2 119.34(15) . 1_455 ?
N3 Cu2 I2 114.19(14) . 1_455 ?
N7 Cu2 I2 114.03(14) . . ?
N3 Cu2 I2 99.92(13) . . ?
I2 Cu2 I2 110.96(3) 1_455 . ?
Cu1 I1 Cu1 63.24(3) 1_455 3 ?
Cu1 I1 Cu1 105.26(3) 1_455 . ?
Cu1 I1 Cu1 78.29(3) 3 . ?
Cu2 I2 Cu2 110.96(3) 1_655 . ?
 
_refine_diff_density_max    1.126
_refine_diff_density_min   -0.869
_refine_diff_density_rms    0.163

_shelx_res_file
;
TITL SIR2014 run in space group P 21/n
    shelx.res
    created by SHELXL-2016/6 at 14:46:14 on 24-Oct-2022
CELL  0.71073   4.2715  18.1144  21.1991   90.000   94.098   90.000
ZERR     4.00   0.0004   0.0019   0.0022    0.000    0.002    0.000
LATT   1
SYMM  1/2 - X, 1/2 + Y, 1/2 - Z
SFAC  C    H    N    CU   I
UNIT  56 36 28 8 8
MERG   2
FMAP   2
PLAN   25
ACTA
L.S.  16
WGHT    0.027900    0.318000
FVAR       0.07042
C1    1    0.344345    0.219820   -0.013022    11.00000    0.02028    0.01902 =
         0.02277   -0.00303    0.00448    0.00266
C2    1    0.693709    0.163006   -0.089329    11.00000    0.02979    0.01784 =
         0.03458    0.00054    0.00501    0.00324
AFIX  43
H2    2    0.704534    0.113982   -0.076327    11.00000   -1.20000
AFIX   0
C3    1    0.832630    0.194092   -0.137475    11.00000    0.03130    0.02729 =
         0.02362   -0.00049    0.00453    0.01248
AFIX  43
H3    2    0.960357    0.168744   -0.163857    11.00000   -1.20000
AFIX   0
C4    1    0.581299    0.282021   -0.098444    11.00000    0.02495    0.02273 =
         0.01342    0.00645   -0.00121    0.00341
C5    1    0.449828    0.421826   -0.103348    11.00000    0.02293    0.02112 =
         0.04086   -0.00018    0.00580    0.00664
C6    1    0.273303    0.458508   -0.062153    11.00000    0.04100    0.02085 =
         0.03878    0.00875    0.00446    0.00710
AFIX  43
H6    2    0.234353    0.508970   -0.064703    11.00000   -1.20000
AFIX   0
C7    1    0.266841    0.350328   -0.029578    11.00000    0.02293    0.02724 =
         0.02134    0.00282    0.00304   -0.00037
C8    1    0.051252    0.273155    0.054737    11.00000    0.03502    0.03017 =
         0.01881   -0.00526    0.00879    0.00289
AFIX  43
H8    2   -0.062550    0.307392    0.076456    11.00000   -1.20000
AFIX   0
C9    1    0.084514    0.200473    0.066930    11.00000    0.03305    0.02976 =
         0.02128   -0.00235    0.00889   -0.00225
AFIX  43
H9    2   -0.003583    0.176215    0.100033    11.00000   -1.20000
AFIX   0
C10   1    0.614771    0.456775   -0.154386    11.00000    0.02662    0.01907 =
         0.02928    0.00452    0.00208   -0.00330
C11   1    0.673949    0.531568   -0.147364    11.00000    0.04733    0.02953 =
         0.03364   -0.00005    0.00521    0.00299
AFIX  43
H11   2    0.622425    0.555459   -0.110682    11.00000   -1.20000
AFIX   0
C12   1    0.807806    0.571011   -0.193855    11.00000    0.06006    0.02303 =
         0.05193    0.00907   -0.00171   -0.00628
AFIX  43
H12   2    0.841915    0.621537   -0.189674    11.00000   -1.20000
AFIX   0
C13   1    0.889710    0.533827   -0.246584    11.00000    0.06109    0.03631 =
         0.04615    0.01588    0.00896   -0.00050
AFIX  43
H13   2    0.983177    0.558335   -0.278900    11.00000   -1.20000
AFIX   0
C14   1    0.830516    0.460203   -0.250296    11.00000    0.06541    0.03769 =
         0.03591    0.00761    0.01346    0.00069
AFIX  43
H14   2    0.889041    0.435178   -0.285908    11.00000   -1.20000
AFIX   0
N1    3    0.267454    0.166326    0.023688    11.00000    0.03177    0.02477 =
         0.01970    0.00197    0.00291    0.00164
N2    3    0.529347    0.220557   -0.063084    11.00000    0.02499    0.01909 =
         0.01826   -0.00063    0.00539    0.00342
N3    3    0.762577    0.268689   -0.143133    11.00000    0.03303    0.02634 =
         0.01761    0.00315    0.00810    0.00465
N4    3    0.445497    0.348480   -0.081449    11.00000    0.02317    0.01850 =
         0.02188    0.00031    0.00140    0.00327
N5    3    0.159277    0.414338   -0.016900    11.00000    0.03441    0.02395 =
         0.03478   -0.00392    0.01267    0.00445
N6    3    0.222414    0.285767    0.003109    11.00000    0.02662    0.02343 =
         0.02225   -0.00039    0.00876    0.00239
N7    3    0.692807    0.420959   -0.205909    11.00000    0.04027    0.02566 =
         0.02668    0.00301    0.00431    0.00000
CU1   4    0.313046    0.054887    0.022484    11.00000    0.04410    0.03115 =
         0.03947    0.00414    0.00920    0.00663
CU2   4    0.663860    0.311906   -0.233021    11.00000    0.03943    0.03607 =
         0.02893    0.00116    0.00528   -0.00143
I1    5   -0.183617    0.009020    0.088782    11.00000    0.02545    0.02891 =
         0.02785    0.00218    0.00742    0.00165
I2    5    1.157666    0.263965   -0.289008    11.00000    0.02452    0.04773 =
         0.03119   -0.00623    0.00907   -0.00287
HKLF    4


REM  SIR2014 run in space group P 21/n
REM R1 =  0.0431 for    2422 Fo > 4sig(Fo)  and  0.0718 for all    3303 data
REM    226 parameters refined using      0 restraints

END

WGHT      0.0279      0.3180

REM Highest difference peak  1.126,  deepest hole -0.869,  1-sigma level  0.163
Q1    1  -0.2927 -0.0318  0.1006  11.00000  0.05    1.13
Q2    1   1.0570  0.3115 -0.2814  11.00000  0.05    1.05
Q3    1  -0.0904 -0.0399  0.0702  11.00000  0.05    0.98
Q4    1   1.0433  0.2124 -0.2768  11.00000  0.05    0.98
Q5    1  -0.2008  0.0124  0.0461  11.00000  0.05    0.96
Q6    1  -0.0849  0.0558  0.0763  11.00000  0.05    0.84
Q7    1  -0.1136  0.0285  0.1297  11.00000  0.05    0.82
Q8    1   1.1400  0.2720 -0.2434  11.00000  0.05    0.80
Q9    1  -0.2950  0.0409  0.0946  11.00000  0.05    0.78
Q10   1   1.2119  0.2405 -0.2487  11.00000  0.05    0.74
Q11   1   1.2611  0.2149 -0.3078  11.00000  0.05    0.71
Q12   1   1.2507  0.3186 -0.3062  11.00000  0.05    0.71
Q13   1   0.2857  0.0084  0.0394  11.00000  0.05    0.66
Q14   1   0.8599  0.2627 -0.3146  11.00000  0.05    0.65
Q15   1   0.3445  0.0698  0.0618  11.00000  0.05    0.65
Q16   1   1.0913  0.2762 -0.3370  11.00000  0.05    0.64
Q17   1   0.8314  0.4870 -0.3589  11.00000  0.05    0.62
Q18   1   0.0038  0.0505  0.0217  11.00000  0.05    0.60
Q19   1   0.6760  0.2588 -0.2468  11.00000  0.05    0.60
Q20   1   0.2079 -0.0277 -0.0031  11.00000  0.05    0.58
Q21   1   0.3949  0.0062  0.0047  11.00000  0.05    0.56
Q22   1   1.1242  0.2303 -0.3260  11.00000  0.05    0.55
Q23   1   0.7894  0.3174 -0.2783  11.00000  0.05    0.55
Q24   1   0.3039  0.0113  0.0820  11.00000  0.05    0.54
Q25   1   0.2488  0.0862 -0.0377  11.00000  0.05    0.54
;
_shelx_res_checksum   53373

_shelx_hkl_file
;
   1   0   0   -0.70    0.52
   1   0   0   -0.24    0.54
  -1   0   0   -1.36    0.79
  -1   0   0   -1.64    0.61
  -2   0   0  430.56    7.89
   2   0   0  448.75   10.28
   2   0   0  453.39    6.27
   2   0   0  451.11    8.10
  -2   0   0  450.21   11.59
  -3   0   0   -0.63    1.44
   3   0   0   -0.20    0.94
  -3   0   0    0.23    0.98
   3   0   0    0.56    1.17
   4   0   0   20.95    2.40
   4   0   0   25.77    3.06
  -4   0   0   26.21    4.64
   5   0   0   -2.97    1.68
  -5   0   0   -0.34    3.40
   0  -1   0   -0.09    0.09
   0  -1   0    0.03    0.12
   0   1   0   -0.23    0.25
   0   1   0   -0.01    0.09
   1  -1   0   21.92    0.98
  -1  -1   0   19.03    1.18
  -1  -1   0   20.16    1.52
   1  -1   0   23.22    0.71
  -1   1   0   20.25    0.78
   1   1   0   22.90    0.99
  -1   1   0   17.73    1.66
   2  -1   0  173.14    3.84
  -2  -1   0  169.21    3.66
  -2  -1   0  171.44    5.57
   2  -1   0  168.94    4.89
   2  -1   0  172.65    2.77
   2   1   0  168.89    3.76
   2   1   0  170.16    4.91
  -2   1   0  164.17    3.36
  -2   1   0  173.16    5.63
   3  -1   0   16.83    1.66
  -3  -1   0   17.85    1.71
   3  -1   0   15.67    2.02
   3  -1   0   15.01    0.98
  -3  -1   0   15.08    2.63
  -3   1   0   15.44    2.60
  -3   1   0   16.40    1.29
   3   1   0   17.66    2.10
   3   1   0   18.46    1.77
   4  -1   0   17.37    2.53
   4  -1   0   15.46    2.23
  -4  -1   0   15.32    3.19
   4   1   0   16.03    2.30
   4   1   0   15.81    2.84
  -4   1   0   17.76    3.38
   5  -1   0    2.49    2.05
  -5  -1   0    5.61    3.71
   5  -1   0    0.12    2.27
  -5   1   0    8.06    3.95
   5   1   0    0.11    2.12
   5   1   0   -4.17    2.34
   0  -2   0    7.70    0.42
   0  -2   0    8.54    0.53
   0   2   0    8.26    0.50
   0   2   0    6.48    1.24
   0   2   0    9.02    0.93
  -1  -2   0    3.16    0.94
   1  -2   0    3.69    0.54
   1  -2   0    2.64    0.64
  -1  -2   0    2.65    0.30
  -1  -2   0    2.33    0.94
   1   2   0    2.69    0.69
  -1   2   0    3.13    0.53
  -2  -2   0   22.71    1.57
  -2  -2   0   23.22    2.13
   2  -2   0   21.79    0.98
   2  -2   0   23.61    1.41
  -2   2   0   22.30    2.25
  -2   2   0   21.40    0.97
   2   2   0   23.11    1.76
   2   2   0   24.02    1.45
   3  -2   0    0.51    0.92
  -3  -2   0    0.19    1.19
  -3  -2   0    0.13    1.55
   3  -2   0    1.11    1.17
   3  -2   0    0.24    0.71
  -3   2   0    0.92    0.77
   3   2   0    1.62    1.32
  -3   2   0   -0.20    1.53
   3   2   0    0.87    1.02
   4  -2   0    8.96    1.96
  -4  -2   0   10.54    2.99
   4  -2   0   10.36    2.07
   4   2   0    8.94    2.14
   4   2   0    9.89    2.17
  -4   2   0   10.70    3.04
   5  -2   0   -1.54    1.76
  -5  -2   0    0.25    3.85
  -5   2   0    2.96    3.98
   5   2   0   -2.68    1.97
   0  -3   0    0.21    0.37
   0  -3   0    0.50    0.56
   0   3   0    0.21    1.38
   0   3   0   -0.33    0.51
   0   3   0    1.48    0.90
  -1  -3   0    1.69    1.00
   1  -3   0    3.11    0.49
   1  -3   0    2.08    0.65
   1  -3   0    2.48    0.58
  -1  -3   0    1.89    0.35
  -1  -3   0    2.08    0.89
   1   3   0    4.54    0.97
   1   3   0    2.51    0.79
  -2  -3   0  202.61    6.25
  -2  -3   0  200.38    4.47
   2  -3   0  204.48    4.44
   2  -3   0  201.53    3.43
   2   3   0  201.28    5.66
  -2   3   0  195.64    6.30
   2   3   0  198.55    4.26
  -2   3   0  201.15    3.65
  -3  -3   0   18.72    2.76
   3  -3   0   21.65    1.28
   3  -3   0   22.70    2.17
   3  -3   0   22.08    1.81
  -3  -3   0   20.07    2.02
  -3   3   0   18.89    2.83
   3   3   0   21.58    2.45
   3   3   0   23.10    2.09
  -4  -3   0   27.60    4.28
   4  -3   0   28.27    3.11
   4  -3   0   25.71    2.44
   4   3   0   23.05    2.72
   4   3   0   28.11    3.52
  -4   3   0   30.19    4.54
   5  -3   0    7.17    2.40
  -5  -3   0    8.34    5.19
   5  -3   0    5.94    2.56
  -5   3   0   14.11    4.81
   5   3   0    3.76    2.56
   0  -4   0  969.88   17.25
   0  -4   0 1000.00   13.98
   0   4   0  979.19   17.00
   0   4   0  902.21   22.41
   0   4   0  790.57   19.17
   1  -4   0    0.06    0.64
   1  -4   0    1.24    0.55
  -1  -4   0    0.22    0.39
  -1  -4   0    0.46    1.11
   1  -4   0    0.78    0.60
   1   4   0    2.88    1.07
   1   4   0    1.29    1.06
   2  -4   0  105.13    2.91
   2  -4   0  107.41    2.29
  -2  -4   0  102.18    3.07
  -2  -4   0  108.02    4.22
  -2   4   0  105.47    4.34
   2   4   0  108.31    2.88
   2   4   0  106.51    3.88
  -3  -4   0   -0.29    1.58
  -3  -4   0    0.45    1.47
   3  -4   0    1.72    1.22
   3  -4   0    0.53    0.85
  -3   4   0   -0.15    1.65
   3   4   0    0.58    1.28
   3   4   0    1.63    1.48
   4  -4   0   14.97    2.22
  -4  -4   0   18.06    2.21
  -4  -4   0   18.48    3.67
   4  -4   0   13.71    2.62
  -4   4   0   19.44    4.36
   4   4   0   13.77    2.58
   4   4   0   14.22    2.43
  -5  -4   0   -3.25    5.07
   5  -4   0   -2.24    2.03
   5  -4   0   -0.08    1.81
  -5   4   0    1.42    4.02
   0  -5   0    0.65    0.63
   0  -5   0    0.84    0.95
   0   5   0    3.26    1.47
   0   5   0   -0.85    0.77
   0   5   0   -0.86    2.32
  -1  -5   0   22.66    0.89
  -1  -5   0   24.52    1.78
   1  -5   0   22.48    1.05
   1  -5   0   22.43    1.15
   1   5   0   26.08    2.07
  -1   5   0   21.54    1.41
  -1   5   0   19.26    2.14
   1   5   0   20.89    1.63
   1   5   0   21.86    1.57
   2  -5   0    6.30    0.85
   2  -5   0    5.04    0.98
  -2  -5   0    5.57    1.41
  -2  -5   0    4.57    0.51
  -2  -5   0    5.22    1.39
   2   5   0    8.67    1.46
   2   5   0    5.60    1.33
  -2   5   0    4.50    1.53
   3  -5   0   56.73    2.62
  -3  -5   0   57.04    3.86
   3  -5   0   54.88    1.96
  -3  -5   0   55.79    2.86
   3   5   0   57.58    2.73
  -3   5   0   54.20    4.00
   3   5   0   59.40    3.45
   4  -5   0    1.24    1.57
  -4  -5   0    3.91    1.76
   4  -5   0    1.30    1.40
  -4  -5   0    1.28    2.79
   4   5   0    1.87    2.16
   4   5   0    1.24    1.93
  -4   5   0    3.31    2.72
  -5  -5   0    6.74    6.06
   5  -5   0    5.71    2.39
   5  -5   0    5.05    2.15
  -5   5   0   12.27    4.78
   5   5   0    1.41    2.48
   0  -6   0    0.74    1.06
   0  -6   0    0.34    0.65
   0   6   0   -0.27    2.26
   0   6   0    2.16    1.54
   0   6   0   -0.74    0.87
  -1  -6   0    1.52    0.54
  -1  -6   0    2.35    1.28
   1  -6   0    1.94    0.71
   1  -6   0    2.41    0.77
  -1   6   0   -0.14    1.22
  -1   6   0    1.04    0.94
   1   6   0    1.68    0.98
   1   6   0    2.45    1.20
   1   6   0    2.68    1.30
   2  -6   0    8.89    0.75
   2  -6   0   10.23    1.18
  -2  -6   0   11.54    1.70
   2  -6   0    8.48    1.12
  -2  -6   0    9.55    0.69
  -2  -6   0    9.87    1.89
   2   6   0   12.23    1.79
   2   6   0   11.26    1.96
  -2   6   0    9.07    2.10
  -3  -6   0   -0.73    1.82
  -3  -6   0   -0.33    1.63
   3  -6   0   -0.50    1.12
   3  -6   0    0.60    1.01
  -3   6   0    0.25    1.80
   3   6   0    0.97    1.56
   3   6   0    1.26    1.82
   4  -6   0    3.61    1.50
  -4  -6   0    5.51    3.22
   4  -6   0    5.06    1.83
  -4  -6   0    6.52    1.98
  -4   6   0    5.70    3.12
   4   6   0    3.19    2.14
   4   6   0    2.00    2.31
   5  -6   0    0.73    2.14
  -5  -6   0   -1.34    5.48
   5  -6   0    1.80    1.95
   5   6   0   -3.28    2.37
  -5   6   0    6.34    4.31
   0  -7   0    0.77    1.07
   0  -7   0   -0.11    0.65
   0   7   0   -1.13    2.57
   0   7   0    0.47    1.50
   0   7   0   -1.08    0.87
   1  -7   0   76.83    2.09
   1  -7   0   78.32    2.08
  -1  -7   0   74.73    1.81
  -1  -7   0   73.72    2.76
   1   7   0   74.20    3.65
  -1   7   0   79.10    2.48
   1   7   0   73.52    3.14
   1   7   0   72.62    2.43
  -1   7   0   76.80    3.34
   2  -7   0   60.93    2.36
   2  -7   0   60.08    1.96
  -2  -7   0   59.33    1.44
   2  -7   0   58.06    1.54
  -2  -7   0   60.40    2.89
  -2   7   0   59.19    3.63
   2   7   0   59.13    3.37
   2   7   0   58.56    2.98
   2   7   0   59.69    2.46
   3  -7   0   95.25    2.73
  -3  -7   0   92.70    5.06
   3  -7   0   94.94    3.49
  -3  -7   0   92.12    3.89
   3   7   0   93.54    3.65
  -3   7   0   91.88    5.23
   3   7   0   96.85    4.80
  -4  -7   0   27.15    2.98
   4  -7   0   23.14    2.50
  -4  -7   0   27.50    4.48
   4   7   0   17.82    3.35
   4   7   0   19.59    3.12
  -4   7   0   28.04    5.11
   5  -7   0   13.33    2.85
  -5  -7   0   14.49    6.77
   5  -7   0   14.94    2.79
   5   7   0    7.16    3.25
   0  -8   0    0.25    0.71
   0  -8   0    0.73    1.20
   0   8   0   -0.86    0.92
   0   8   0    0.76    2.67
   0   8   0    0.75    1.67
  -1  -8   0    0.43    1.46
   1  -8   0    0.95    0.97
   1  -8   0    1.40    0.84
  -1  -8   0    0.48    0.64
   1   8   0    1.16    1.20
  -1   8   0   -0.88    1.38
   1   8   0    3.53    1.87
   1   8   0    1.94    1.36
  -1   8   0    0.89    1.04
  -2  -8   0    3.64    0.69
  -2  -8   0    3.18    1.84
   2  -8   0    3.60    1.10
   2  -8   0    4.14    0.81
   2  -8   0    4.77    1.05
   2   8   0    4.72    1.66
   2   8   0    3.10    1.31
  -2   8   0    2.44    1.77
   2   8   0    3.73    1.62
  -3  -8   0    0.09    2.14
   3  -8   0    1.81    1.40
   3  -8   0    1.08    1.13
  -3   8   0    0.71    2.09
   3   8   0    3.79    2.17
   3   8   0    2.87    1.98
   4  -8   0    0.34    1.57
  -4  -8   0    3.98    2.22
  -4   8   0    3.04    3.27
   4   8   0   -1.00    2.36
   4   8   0    1.14    2.32
   0  -9   0   -0.21    0.73
   0  -9   0   -0.38    1.25
   0   9   0   -1.17    1.00
  -1  -9   0    1.39    1.57
   1  -9   0    2.75    1.11
   1  -9   0    1.19    0.84
  -1  -9   0    1.22    0.68
   1   9   0    5.53    2.06
   1   9   0    1.52    1.51
   1   9   0    2.24    1.28
  -1   9   0    1.55    1.53
  -1   9   0    2.28    1.17
   2  -9   0    7.78    1.05
  -2  -9   0    7.02    2.12
   2  -9   0    7.77    1.37
   2  -9   0    6.29    1.18
  -2  -9   0    7.21    0.88
   2   9   0    8.04    1.88
   2   9   0    6.88    1.66
   2   9   0    7.49    2.22
  -2   9   0    6.62    2.06
   3  -9   0    9.00    1.76
   3  -9   0    6.88    1.42
  -3  -9   0    9.55    2.47
   3   9   0    8.82    2.10
   3   9   0    7.86    2.26
   3   9   0   13.29    2.44
  -3   9   0   10.51    2.83
   4  -9   0    6.59    2.04
  -4  -9   0    6.47    2.31
   4   9   0    1.57    2.39
   4   9   0    7.72    2.30
   4   9   0    0.10    2.57
  -4   9   0    8.66    3.77
   0 -10   0    0.44    0.80
   0 -10   0    0.34    1.36
   0  10   0    2.19    1.83
   0  10   0    1.62    1.12
   1 -10   0  143.58    3.59
  -1 -10   0  143.86    3.09
  -1 -10   0  145.80    4.33
   1 -10   0  145.37    3.38
   1  10   0  137.80    5.19
  -1  10   0  146.36    3.92
  -1  10   0  141.65    5.27
   1  10   0  142.54    6.05
   1  10   0  142.36    3.71
   2 -10   0    0.11    1.04
  -2 -10   0    0.16    0.77
   2 -10   0   -0.03    1.04
   2 -10   0    0.32    1.11
  -2 -10   0   -0.55    2.04
  -2  10   0   -0.25    1.82
   2  10   0    0.11    1.39
   2  10   0    2.75    1.79
   2  10   0    1.73    1.99
   3 -10   0    0.47    1.32
   3 -10   0   -0.10    1.25
  -3 -10   0    0.24    2.25
   3  10   0    3.34    2.22
   3  10   0    3.22    2.40
   3  10   0    0.54    1.73
  -3  10   0    2.26    2.42
  -4 -10   0    2.60    2.42
   4 -10   0   -0.30    1.64
  -4  10   0    2.98    3.71
   4  10   0    2.20    2.14
   4  10   0   -0.88    2.58
   0 -11   0   -0.27    0.85
   0 -11   0    0.13    1.44
   0  11   0    0.04    1.19
   0  11   0    2.13    2.16
   1 -11   0   88.91    2.96
  -1 -11   0   88.29    3.68
  -1 -11   0   89.87    2.45
   1 -11   0   89.22    2.64
  -1  11   0   92.82    3.20
   1  11   0   87.42    3.02
   1  11   0   93.38    5.97
   1  11   0   87.09    4.40
  -1  11   0   92.99    4.46
   2 -11   0    9.40    1.46
  -2 -11   0    9.86    2.46
   2 -11   0   11.01    1.41
   2 -11   0   10.50    1.64
  -2 -11   0    9.95    1.29
   2  11   0    9.20    2.10
   2  11   0   14.31    2.86
   2  11   0   13.86    2.23
  -2  11   0   10.34    2.50
   3 -11   0  118.36    3.54
   3 -11   0  118.91    4.23
  -3 -11   0  120.19    4.94
   3  11   0  114.59    5.69
  -3  11   0  133.00    7.03
   3  11   0  111.65    6.16
   3  11   0  117.50    4.35
   4 -11   0   15.05    2.46
  -4 -11   0   20.52    3.45
   4  11   0   18.02    3.35
  -4  11   0   23.59    5.36
   0 -12   0   32.55    2.52
   0 -12   0   30.32    1.80
   0  12   0   36.36    4.93
   0  12   0   31.12    2.11
  -1 -12   0   -0.67    1.94
   1 -12   0    0.45    1.49
   1 -12   0    0.52    1.08
  -1 -12   0    0.81    0.97
  -1  12   0   -1.44    1.99
  -1  12   0    0.10    1.43
   1  12   0    4.06    3.25
   1  12   0    2.67    2.40
   1  12   0    1.42    1.44
   2 -12   0   14.00    1.80
   2 -12   0   12.29    1.65
  -2 -12   0   15.98    2.93
  -2 -12   0   14.66    1.51
   2  12   0   17.37    2.30
  -2  12   0   15.48    2.87
   2  12   0   13.99    2.97
   2  12   0   12.56    2.55
  -3 -12   0    7.44    2.71
   3 -12   0    6.54    1.58
   3 -12   0    8.07    1.87
  -3  12   0   12.86    3.67
   3  12   0    5.22    2.24
   3  12   0    4.63    2.84
   3  12   0   11.21    2.45
   4 -12   0   -0.01    1.69
  -4 -12   0    4.21    2.64
  -4  12   0    8.46    4.24
  -1 -13   0    9.20    1.32
   1 -13   0    9.64    1.87
   1 -13   0    9.36    1.51
  -1 -13   0    9.54    2.42
   1  13   0    8.20    3.87
  -1  13   0   10.10    1.98
  -1  13   0    9.37    2.49
   1  13   0   10.89    1.86
   1  13   0   10.52    2.93
   2 -13   0    2.67    1.41
   2 -13   0    3.19    1.42
  -2 -13   0    1.52    2.51
  -2 -13   0    2.17    1.08
  -2  13   0    2.02    2.57
   2  13   0    3.24    2.39
   2  13   0    2.89    1.91
   2  13   0    3.66    2.75
  -3 -13   0   10.99    2.95
   3 -13   0    9.15    1.94
   3 -13   0    8.00    1.73
   3  13   0    5.84    2.80
   3  13   0   12.14    2.51
  -3  13   0   16.13    4.19
   3  13   0    4.69    2.50
  -4 -13   0    5.29    2.88
  -4  13   0    8.99    4.42
   0 -14   0    8.46    1.44
   0 -14   0    8.76    2.23
   0  14   0    8.11    4.21
   0  14   0    9.56    1.85
   1 -14   0  150.03    4.48
  -1 -14   0  152.16    5.33
  -1 -14   0  151.75    3.80
   1 -14   0  153.89    4.09
  -1  14   0  151.57    4.62
   1  14   0  151.92    4.44
   1  14   0  140.60    9.47
  -1  14   0  157.86    6.71
   1  14   0  134.50    6.33
   2 -14   0    0.86    1.34
  -2 -14   0    1.28    2.46
  -2 -14   0   -1.24    1.04
   2 -14   0   -0.18    1.34
   2  14   0    3.04    2.97
   2  14   0   -1.42    2.33
  -2  14   0    1.00    2.37
   2  14   0    0.04    1.87
   3 -14   0   -1.87    1.50
   3 -14   0    0.37    1.50
  -3 -14   0    1.56    2.63
  -3  14   0    7.78    3.82
   3  14   0    1.28    2.78
  -4 -14   0    6.15    3.03
   4 -14   0    0.54    1.84
  -4  14   0   11.18    4.47
   0 -15   0    0.59    2.11
   0 -15   0    0.78    1.29
   0  15   0   -0.65    1.55
  -1 -15   0   23.04    3.53
   1 -15   0   25.43    2.29
  -1 -15   0   23.05    2.00
   1 -15   0   21.42    2.71
   1  15   0   23.66    2.45
  -1  15   0   24.79    4.39
  -1  15   0   20.42    2.46
   1  15   0   21.76    5.20
   1  15   0   21.25    4.36
  -2 -15   0   12.12    1.53
  -2 -15   0   17.81    3.17
   2 -15   0   13.90    2.07
   2 -15   0   13.72    1.96
   2  15   0   11.58    3.61
  -2  15   0   22.09    4.47
   2  15   0   14.87    2.23
   3 -15   0   25.12    2.60
   3 -15   0   29.53    2.69
  -3 -15   0   32.98    4.46
   3  15   0   20.87    4.06
   0 -16   0   25.43    3.22
   0 -16   0   23.73    2.27
   0  16   0   23.17    2.45
   0  16   0   21.79    5.43
  -1 -16   0    9.80    2.83
   1 -16   0    9.32    1.78
  -1 -16   0   10.14    1.65
   1 -16   0   11.15    2.24
  -1  16   0   12.92    2.94
   1  16   0    9.02    2.97
   1  16   0    8.53    4.76
  -1  16   0   10.83    2.11
   1  16   0   10.52    2.06
  -2 -16   0   15.16    3.23
  -2 -16   0   13.61    1.71
   2 -16   0   16.12    2.27
   2 -16   0   14.00    2.03
   2  16   0   17.78    2.51
   2  16   0   15.27    4.13
   3 -16   0    4.13    1.81
  -3 -16   0    7.28    3.28
   3 -16   0   -0.45    1.70
   3  16   0   -1.35    3.47
   0 -17   0    0.14    2.23
   0 -17   0   -0.53    1.35
   0  17   0    0.49    1.65
   0  17   0   -6.91    4.48
  -1 -17   0    5.13    2.80
   1 -17   0    3.38    1.63
  -1 -17   0    3.94    1.52
   1 -17   0    4.94    2.15
   1  17   0    7.52    4.79
  -1  17   0    9.03    2.80
  -1  17   0    5.96    2.04
   1  17   0    6.22    1.91
  -2 -17   0    2.91    2.86
   2 -17   0   -0.06    1.44
   2 -17   0   -0.69    1.58
  -2  17   0    8.42    3.02
   2  17   0    3.20    1.93
   2  17   0   -0.21    3.91
   3 -17   0   -0.69    1.77
  -3 -17   0    4.82    3.26
   3 -17   0    3.30    1.77
   0 -18   0   11.11    2.76
   0 -18   0   10.94    1.99
   0  18   0   11.77    2.29
  -1 -18   0   16.05    2.02
   1 -18   0   12.91    1.94
  -1 -18   0   19.66    3.37
   1 -18   0   18.65    2.99
  -1  18   0   18.52    2.68
   1  18   0   20.02    2.70
   1  18   0   21.30    5.49
   2 -18   0    0.34    1.78
  -2 -18   0    3.02    3.04
   2 -18   0    4.57    1.82
   2  18   0    7.88    2.41
   2  18   0    3.70    4.31
  -3 -18   0    2.16    3.35
   0 -19   0    2.07    2.61
   0 -19   0   -0.20    1.60
   0  19   0    1.97    1.90
  -1 -19   0    1.83    2.89
   1 -19   0    1.55    2.20
   1 -19   0   -0.18    1.70
  -1  19   0    2.82    2.04
   1  19   0    2.76    1.83
   2 -19   0    4.17    2.07
   2 -19   0    7.43    2.02
  -2 -19   0   12.84    3.64
   2  19   0    6.71    4.75
   0 -20   0    5.73    2.75
   0 -20   0    0.02    1.84
   0  20   0    5.32    2.12
  -1 -20   0   -0.05    1.68
  -1 -20   0    5.33    3.02
   1 -20   0   -0.17    1.86
  -1  20   0    2.77    2.19
   1  20   0    5.66    2.00
   2 -20   0    3.07    1.91
  -2 -20   0    7.83    3.57
   2 -20   0   -2.89    1.88
   2  20   0    0.79    5.06
   0 -21   0    0.68    2.66
   0 -21   0   -3.35    1.71
   0  21   0    1.61    2.01
  -1 -21   0    0.58    2.93
   1 -21   0   -3.93    1.75
   1  21   0    3.06    1.97
  -1  21   0    1.79    2.18
   0 -22   0    5.51    2.23
   0 -22   0   12.56    3.20
   0  22   0   12.16    2.60
  -1 -22   0    8.69    3.39
  -1 -22   0   -0.77    1.99
   1 -22   0   -0.83    2.09
  -1  22   0    5.65    2.50
  -5   0   1   23.91    4.93
   5   0  -1   13.77    2.80
   5   0  -1   13.76    2.78
   4   0  -1   -0.46    1.58
  -4   0   1    0.73    2.25
   4   0  -1    1.00    1.43
  -3   0   1   -0.48    1.46
   3   0  -1    1.11    1.07
   3   0  -1    1.62    1.14
  -3   0   1    1.53    1.03
   2   0  -1   -0.41    0.71
  -2   0   1   -0.41    0.75
  -2   0   1   -0.49    1.07
   2   0  -1   -0.05    0.74
   2   0  -1    0.21    0.36
  -1   0   1   18.24    1.50
   1   0  -1   19.98    0.51
  -1   0   1   18.88    0.99
   1   0  -1   19.59    1.23
   1   0  -1   20.98    0.89
   0   0   1    0.01    0.08
   0   0   1    0.03    0.09
  -1   0  -1    5.61    0.88
   1   0   1    6.61    0.93
   1   0   1    8.11    0.84
  -1   0  -1    5.80    1.11
   2   0   1    0.52    0.87
  -2   0  -1   -1.03    1.08
   2   0   1   -0.12    0.73
   2   0   1    0.01    0.49
  -2   0  -1    0.62    0.76
  -3   0  -1    1.20    0.99
   3   0   1    0.71    0.96
  -3   0  -1    0.70    1.55
   3   0   1    2.01    0.60
   3   0   1    0.09    1.20
   4   0   1    0.27    1.37
  -4   0  -1    0.62    2.31
   4   0   1   -0.09    1.78
   5   0   1   -4.86    2.31
   5   0   1    1.53    2.09
  -5   0  -1    6.16    3.84
   5  -1  -1   -2.63    2.09
   5  -1  -1    1.86    2.02
  -5  -1   1    3.34    4.05
   5   1  -1    0.56    2.08
  -5   1   1    4.42    3.72
   4  -1  -1    2.42    1.58
  -4  -1   1    2.32    2.39
   4  -1  -1    1.35    1.40
  -4   1   1    2.55    2.43
   4   1  -1    1.89    1.55
   4   1  -1    1.04    1.72
   3  -1  -1   27.58    2.39
  -3  -1   1   24.60    2.89
   3  -1  -1   26.06    1.06
  -3  -1   1   26.30    1.75
   3  -1  -1   27.25    1.83
   3   1  -1   27.44    2.40
  -3   1   1   26.42    1.54
   3   1  -1   26.05    1.82
  -3   1   1   25.98    2.90
  -2  -1   1  116.97    2.89
   2  -1  -1  117.31    3.86
  -2  -1   1  120.70    4.46
   2  -1  -1  119.08    2.05
   2  -1  -1  119.28    2.96
   2   1  -1  122.08    2.90
  -2   1   1  117.46    4.45
  -2   1   1  113.38    2.62
   2   1  -1  122.14    3.92
  -1  -1   1    5.58    0.89
   1  -1  -1    6.02    0.54
  -1  -1   1    5.38    1.25
   1  -1  -1    6.13    0.70
   1   1  -1    6.87    0.73
  -1   1   1    5.76    1.15
   1   1  -1    5.74    0.90
  -1   1   1    5.97    0.77
   0  -1   1  173.29    2.87
   0  -1   1  176.91    2.97
   0  -1  -1  175.32    3.02
   0  -1   1  182.11    2.51
   0   1   1  168.94    2.90
   0   1   1  173.41    2.52
   0   1  -1  164.83    4.13
   1  -1   1    6.37    0.72
  -1  -1  -1    6.87    0.89
  -1  -1  -1    6.43    1.06
   1   1   1    8.38    0.94
   1   1   1    5.41    0.55
  -1   1  -1    4.52    1.17
   1   1   1    6.23    0.87
  -2  -1  -1   36.63    2.47
   2  -1   1   37.37    2.03
   2  -1   1   39.19    1.14
   2  -1   1   40.70    1.75
  -2  -1  -1   35.74    1.65
   2   1   1   37.83    2.05
   2   1   1   37.45    1.74
  -2   1  -1   38.74    2.63
  -2   1  -1   38.53    1.29
   2   1   1   37.82    0.89
  -3  -1  -1   11.36    1.52
   3  -1   1   10.79    1.01
  -3  -1  -1   10.63    2.09
   3  -1   1   10.91    1.63
   3  -1   1   10.09    1.86
  -3   1  -1   10.84    1.18
   3   1   1   11.95    1.89
   3   1   1   10.34    1.91
  -3   1  -1   10.40    2.15
  -4  -1  -1    5.51    2.68
   4  -1   1    4.83    1.72
   4  -1   1    5.22    1.89
   4   1   1    3.70    1.60
  -4   1  -1    7.56    2.83
   4   1   1    4.69    1.94
  -5  -1  -1    2.73    3.76
   5  -1   1   -0.19    1.84
  -5   1  -1    4.18    3.96
   5  -2  -1   -3.02    1.97
   5  -2  -1   -1.77    1.69
  -5  -2   1    1.41    4.22
  -5   2   1   -0.07    3.42
   4  -2  -1   16.52    2.71
  -4  -2   1   17.68    3.38
   4  -2  -1   14.97    2.11
   4   2  -1   15.44    2.94
  -4   2   1   18.26    4.16
   4   2  -1   15.22    2.32
  -3  -2   1    8.22    1.99
  -3  -2   1   10.03    1.50
   3  -2  -1    7.94    1.56
   3  -2  -1    9.44    1.45
   3  -2  -1    7.97    0.97
   3   2  -1    9.32    1.50
   3   2  -1    7.51    1.54
  -3   2   1    7.70    1.13
  -3   2   1    8.32    2.04
  -2  -2   1    0.65    1.16
   2  -2  -1    0.66    0.75
   2  -2  -1    0.23    0.51
  -2  -2   1    0.19    1.00
   2   2  -1    0.93    0.90
  -2   2   1   -0.34    1.09
  -2   2   1    0.38    0.62
   2   2  -1    0.84    0.83
  -1  -2   1   29.76    1.79
   1  -2  -1   30.62    0.93
   1  -2  -1   29.73    1.15
  -1  -2   1   32.29    0.62
  -1  -2   1   28.18    1.52
  -1   2   1   26.33    1.82
   1   2  -1   30.86    1.60
   1   2  -1   33.36    1.15
  -1   2   1   30.50    1.00
   0  -2  -1  135.10    2.48
   0  -2   1  134.76    2.43
   0  -2   1  136.27    2.07
   0   2   1  125.53    3.01
   0   2  -1  133.09    3.56
   0   2  -1  137.44    2.29
   0   2   1  136.69    2.43
   0   2   1  112.64    3.38
   0   2   1  133.45    2.07
   1  -2   1    6.72    0.76
  -1  -2  -1    6.49    1.04
  -1  -2  -1    5.27    0.94
   1  -2   1    5.43    0.80
   1   2   1    6.14    1.10
   1   2   1    5.00    0.45
   2  -2   1   34.25    1.16
  -2  -2  -1   35.29    1.79
   2  -2   1   35.54    1.68
  -2  -2  -1   34.14    2.37
  -2   2  -1   34.18    1.06
  -2   2  -1   33.85    2.58
   2   2   1   37.05    2.18
   2   2   1   36.61    1.75
  -3  -2  -1   58.41    3.79
  -3  -2  -1   56.90    2.47
   3  -2   1   58.85    2.56
   3  -2   1   57.64    3.14
   3  -2   1   58.45    1.68
   3   2   1   57.50    2.60
   3   2   1   58.34    3.28
  -3   2  -1   55.39    1.71
  -3   2  -1   54.91    3.82
  -4  -2  -1    2.52    2.35
   4  -2   1    0.98    1.34
   4  -2   1   -0.40    1.67
  -4   2  -1    1.80    2.39
   4   2   1    0.73    1.45
   4   2   1    0.01    1.87
   5  -2   1   13.65    2.70
   5  -2   1   16.72    3.05
   5   2   1    8.29    2.99
   5   2   1   14.05    3.13
   5  -3  -1    0.66    2.13
  -5  -3   1    5.30    5.18
   5  -3  -1    1.23    1.87
   5   3  -1   -1.15    2.25
  -5   3   1    5.26    3.99
   4  -3  -1   28.66    2.88
  -4  -3   1   31.79    4.67
  -4  -3   1   29.34    2.48
   4  -3  -1   29.64    2.49
   4   3  -1   29.73    3.53
  -4   3   1   30.64    4.55
   4   3  -1   24.34    2.69
  -3  -3   1   36.89    3.23
   3  -3  -1   35.87    2.57
   3  -3  -1   36.39    1.42
  -3  -3   1   35.04    2.22
   3  -3  -1   37.29    2.09
  -3   3   1   34.22    1.48
   3   3  -1   36.90    2.84
   3   3  -1   36.52    2.09
  -3   3   1   32.83    3.15
   2  -3  -1  289.13    4.55
   2  -3  -1  289.24    5.74
  -2  -3   1  283.58    5.86
  -2  -3   1  283.25    8.17
  -2   3   1  285.08    5.16
   2   3  -1  282.36    5.49
  -2   3   1  283.71    8.20
   2   3  -1  288.11    7.30
  -1  -3   1    6.26    1.45
  -1  -3   1    6.42    1.10
  -1  -3   1    7.12    0.54
   1  -3  -1    5.77    0.77
   1   3  -1    7.54    1.36
  -1   3   1    3.97    1.14
  -1   3   1    6.58    0.88
   0  -3  -1  141.17    2.29
   0  -3   1  137.50    2.27
   0  -3  -1  139.88    2.74
   0  -3   1  136.54    2.70
   0   3   1  139.05    2.68
   0   3   1  136.61    3.42
   0   3  -1  136.65    2.52
   0   3  -1  134.53    3.95
   1  -3   1  209.07    4.00
   1  -3   1  209.34    3.38
  -1  -3  -1  207.90    5.38
  -1  -3  -1  197.58    4.16
   1   3   1  204.63    4.98
   1   3   1  199.11    3.95
  -1   3  -1  204.93    5.75
   1   3   1  203.08    3.08
   2  -3   1   20.07    1.41
  -2  -3  -1   21.35    1.62
  -2  -3  -1   21.13    2.04
   2  -3   1   20.43    1.10
   2   3   1   22.00    1.93
  -2   3  -1   19.62    2.27
   2   3   1   22.44    1.67
   3  -3   1   44.76    2.82
   3  -3   1   46.17    2.34
   3  -3   1   43.96    1.64
  -3  -3  -1   44.02    3.54
  -3  -3  -1   42.56    2.47
   3   3   1   43.32    2.59
  -3   3  -1   43.48    3.57
   3   3   1   46.92    3.11
   4  -3   1   24.91    2.65
  -4  -3  -1   28.02    4.28
   4  -3   1   26.73    3.09
   4   3   1   24.60    3.13
   4   3   1   24.27    2.68
  -4   3  -1   30.49    4.69
   5  -3   1   -3.94    2.10
   5  -3   1   -1.49    1.70
  -5  -3  -1   -0.26    3.94
  -5   3  -1    4.23    4.07
   5  -4  -1   42.78    4.41
  -5  -4   1   42.30    6.89
   5  -4  -1   38.38    3.30
  -5   4   1   52.61    6.61
   5   4  -1   37.09    4.73
  -4  -4   1   -0.46    2.71
   4  -4  -1   -0.28    1.49
  -4  -4   1    2.24    1.63
   4  -4  -1    0.52    1.18
   4   4  -1   -1.03    1.83
   4   4  -1   -0.50    1.66
  -4   4   1   -0.24    2.28
   3  -4  -1    5.00    0.95
  -3  -4   1    4.48    1.90
   3  -4  -1    6.28    1.41
  -3  -4   1    5.18    1.65
   3   4  -1    6.37    1.60
   3   4  -1    4.96    1.55
  -3   4   1    4.41    1.83
  -2  -4   1   51.93    3.05
  -2  -4   1   50.17    2.24
   2  -4  -1   54.18    2.01
   2  -4  -1   52.94    1.56
   2   4  -1   50.77    1.97
   2   4  -1   54.59    2.79
  -2   4   1   54.19    3.08
  -2   4   1   52.19    1.53
   1  -4  -1   99.49    2.14
   1  -4  -1   98.95    2.04
  -1  -4   1  104.04    1.77
  -1  -4   1   97.92    2.73
   1   4  -1   98.18    2.35
  -1   4   1   96.48    2.51
  -1   4   1   93.84    3.45
   1   4  -1   96.81    3.27
   1   4  -1  103.47    3.30
   0  -4   1   52.10    1.33
   0  -4  -1   53.90    1.67
   0  -4  -1   51.42    1.30
   0  -4   1   52.73    1.66
   0   4   1   48.02    3.79
   0   4  -1   58.76    2.87
   0   4  -1   44.08    3.85
   0   4   1   49.83    1.60
   0   4  -1   51.48    1.47
   1  -4   1  202.57    3.43
  -1  -4  -1  198.31    4.23
  -1  -4  -1  202.98    5.38
  -1  -4  -1  204.35    3.14
   1  -4   1  200.59    3.50
   1  -4   1  202.60    4.04
  -1   4  -1  201.18    5.79
   1   4   1  196.75    4.04
   1   4   1  206.50    5.18
  -2  -4  -1   11.11    1.62
  -2  -4  -1   11.82    1.75
   2  -4   1   11.61    1.25
   2  -4   1   11.82    1.11
  -2  -4  -1   11.02    0.48
   2   4   1   12.74    1.81
  -2   4  -1   10.49    1.88
   2   4   1   13.60    1.55
   3  -4   1   16.97    1.78
  -3  -4  -1   14.52    2.73
  -3  -4  -1   15.96    2.20
   3  -4   1   16.44    1.40
   3   4   1   16.04    2.06
  -3   4  -1   14.81    2.90
   3   4   1   18.80    2.52
  -4  -4  -1   24.41    4.28
  -4  -4  -1   25.97    2.48
   4  -4   1   21.35    2.45
   4  -4   1   23.09    2.95
  -4   4  -1   24.29    4.71
   4   4   1   17.88    2.79
   4   4   1   22.17    3.14
   5  -4   1    1.90    2.29
  -5  -4  -1    2.28    5.14
   5  -4   1    2.12    1.97
  -5   4  -1    7.12    4.40
   5   4   1   -1.63    2.26
   5  -5  -1    0.90    1.89
   5  -5  -1   -0.91    1.98
  -5  -5   1   -2.83    5.55
   5   5  -1   -3.96    2.18
  -5   5   1    5.29    4.14
   4  -5  -1    0.51    1.48
   4  -5  -1    1.95    1.41
  -4  -5   1    3.56    1.77
  -4  -5   1    2.29    3.03
  -4   5   1    2.74    2.61
   4   5  -1    0.28    1.74
   4   5  -1   -0.15    2.04
   3  -5  -1   60.16    2.62
  -3  -5   1   59.95    4.14
  -3  -5   1   56.66    2.98
   3  -5  -1   56.71    1.93
   3   5  -1   58.34    3.61
   3   5  -1   56.89    2.71
  -3   5   1   54.54    3.91
   2  -5  -1    0.37    0.59
  -2  -5   1    0.05    1.30
   2  -5  -1    0.46    0.64
  -2  -5   1    0.17    0.37
   2  -5  -1    0.15    0.74
  -2  -5   1   -0.43    1.22
  -2   5   1   -0.81    1.18
   2   5  -1    1.87    1.21
   2   5  -1    0.28    0.95
  -1  -5   1   41.84    1.15
   1  -5  -1   43.35    1.42
   1  -5  -1   41.80    1.40
  -1  -5   1   40.59    2.05
  -1   5   1   41.62    1.75
  -1   5   1   39.18    2.29
   1   5  -1   39.05    1.82
   1   5  -1   41.51    2.18
   1   5  -1   45.44    2.61
   0  -5   1  172.10    2.95
   0  -5  -1  166.81    3.57
   0  -5   1  169.31    3.53
   0  -5  -1  171.85    2.96
   0   5  -1  165.37    5.20
   0   5   1  168.95    3.45
   0   5   1  163.55    6.02
   0   5  -1  145.11    5.94
   0   5   1  164.44    4.73
   0   5  -1  175.22    3.32
  -1  -5  -1    7.58    0.72
  -1  -5  -1    8.94    1.38
   1  -5   1    7.32    0.97
   1  -5   1    8.09    0.89
   1  -5   1    8.65    0.99
  -1   5  -1    6.08    1.57
   1   5   1   10.13    1.47
   1   5   1    5.28    1.19
  -2  -5  -1   73.75    2.74
  -2  -5  -1   73.39    1.39
   2  -5   1   74.42    2.44
  -2  -5  -1   73.86    3.42
   2  -5   1   73.65    1.99
   2   5   1   72.59    2.55
   2   5   1   76.69    3.34
  -2   5  -1   72.30    3.72
   3  -5   1   30.45    2.14
  -3  -5  -1   28.91    3.07
   3  -5   1   29.71    1.69
  -3  -5  -1   28.84    2.60
  -3   5  -1   29.05    3.37
   3   5   1   31.76    2.57
   3   5   1   29.50    2.96
  -4  -5  -1   -0.52    2.61
   4  -5   1   -0.65    1.54
  -4  -5  -1    2.08    1.69
   4  -5   1    0.68    1.28
  -4   5  -1    0.51    2.67
   4   5   1   -0.45    1.75
   4   5   1   -0.12    2.12
  -5  -5  -1   -2.64    5.11
   5  -5   1   -3.34    1.98
   5  -5   1    0.50    1.82
  -5   5  -1    3.40    4.10
   5   5   1   -3.39    2.29
   5  -6  -1    2.41    1.94
   5  -6  -1   -2.29    1.96
  -5  -6   1   -2.62    5.64
  -5   6   1    3.84    4.46
   5   6  -1   -3.58    2.36
  -4  -6   1   27.93    5.23
  -4  -6   1   33.13    2.85
   4  -6  -1   28.21    2.50
  -4   6   1   35.63    5.02
   4   6  -1   27.81    3.43
   4   6  -1   25.88    3.04
   3  -6  -1   16.78    1.46
  -3  -6   1   19.08    3.27
  -3  -6   1   16.38    2.54
   3  -6  -1   18.14    1.84
   3   6  -1   18.84    2.31
   3   6  -1   17.59    2.76
  -3   6   1   15.95    2.98
   2  -6  -1   -0.40    0.63
   2  -6  -1   -0.36    0.85
  -2  -6   1   -0.10    1.42
  -2  -6   1   -0.31    0.45
   2  -6  -1   -0.06    0.71
  -2   6   1   -0.70    1.25
   2   6  -1    0.69    1.24
   2   6  -1    1.38    1.26
  -1  -6   1   85.95    1.82
  -1  -6   1   83.22    2.65
   1  -6  -1   87.52    2.18
   1  -6  -1   90.29    2.14
   1   6  -1   88.82    3.61
   1   6  -1   86.20    3.34
  -1   6   1   85.32    3.29
  -1   6   1   85.57    2.47
   1   6  -1   85.38    2.36
   0  -6  -1  170.50    3.08
   0  -6  -1  174.26    3.78
   0  -6   1  171.38    3.73
   0  -6   1  172.73    3.11
   0   6   1  168.04    4.93
   0   6   1  173.72    6.19
   0   6  -1  157.03    6.43
   0   6  -1  175.78    3.50
   0   6  -1  161.94    5.34
   0   6   1  171.34    3.65
   1  -6   1    2.80    0.75
  -1  -6  -1    2.27    0.57
   1  -6   1    2.76    0.76
  -1  -6  -1    2.88    1.16
   1   6   1    2.57    0.93
  -1   6  -1    1.07    1.34
   1   6   1    4.29    1.44
   1   6   1    3.44    1.30
  -2  -6  -1  105.45    4.18
   2  -6   1  105.02    3.09
  -2  -6  -1  105.84    1.93
   2  -6   1  103.72    2.55
  -2  -6  -1  103.86    3.39
   2   6   1  105.21    3.20
   2   6   1  104.82    4.13
  -2   6  -1  106.18    4.59
   3  -6   1   77.89    3.03
  -3  -6  -1   73.30    3.34
   3  -6   1   76.88    2.43
  -3  -6  -1   75.06    4.44
  -3   6  -1   77.06    4.78
   3   6   1   77.27    3.30
   3   6   1   78.37    4.05
   4  -6   1    0.62    1.30
  -4  -6  -1   -0.76    2.87
   4  -6   1    0.50    1.56
  -4  -6  -1    1.08    1.81
   4   6   1   -1.03    1.86
   4   6   1   -0.86    2.26
  -4   6  -1    1.95    2.81
  -5  -6  -1   37.97    7.53
   5  -6   1   23.18    3.24
   5  -6   1   25.51    3.94
   5   6   1   16.05    3.49
   5  -7  -1   -1.78    1.99
  -5  -7   1   -7.04    5.73
   5  -7  -1    1.65    1.88
   5   7  -1   -3.39    2.50
  -5   7   1    8.69    4.66
   4  -7  -1   23.68    2.46
  -4  -7   1   25.78    5.74
  -4  -7   1   28.57    2.96
   4   7  -1   25.75    3.00
  -4   7   1   30.56    5.12
   4   7  -1   21.77    3.84
  -3  -7   1   50.80    4.06
   3  -7  -1   52.54    2.16
  -3  -7   1   50.12    3.35
   3  -7  -1   53.06    2.65
   3   7  -1   54.54    2.94
   3   7  -1   52.25    3.87
  -3   7   1   48.60    4.06
  -2  -7   1  163.32    2.81
   2  -7  -1  165.93    3.45
  -2  -7   1  164.69    4.52
   2  -7  -1  165.32    3.30
   2  -7  -1  171.71    4.20
   2   7  -1  157.24    3.92
  -2   7   1  162.68    5.79
   2   7  -1  160.98    5.52
   2   7  -1  160.29    5.43
   1  -7  -1   21.89    1.20
   1  -7  -1   23.60    1.35
  -1  -7   1   22.10    1.99
  -1  -7   1   22.44    1.09
   1   7  -1   20.99    1.52
   1   7  -1   26.33    2.92
   1   7  -1   23.32    2.23
  -1   7   1   20.08    2.02
  -1   7   1   22.41    1.46
   0  -7  -1   25.39    1.24
   0  -7   1   24.65    1.68
   0  -7  -1   26.31    1.72
   0  -7   1   25.49    1.26
   0   7   1   22.86    2.29
   0   7   1   27.13    3.94
   0   7  -1   23.61    1.43
   0   7  -1   24.96    4.02
   0   7  -1   25.05    2.86
   0   7   1   24.42    1.54
  -1  -7  -1  104.66    2.19
  -1  -7  -1   99.78    3.08
   1  -7   1  102.58    2.44
   1  -7   1  103.36    2.46
   1   7   1   98.98    4.12
  -1   7  -1  102.00    4.06
   1   7   1  103.32    3.55
   1   7   1  100.23    2.98
  -1   7  -1  107.69    2.90
  -2  -7  -1   27.44    2.36
   2  -7   1   29.07    1.53
   2  -7   1   27.32    1.74
  -2  -7  -1   28.45    1.04
   2   7   1   30.03    2.82
   2   7   1   29.03    2.31
  -2   7  -1   26.77    2.87
   3  -7   1   84.20    2.68
  -3  -7  -1   78.80    4.63
  -3  -7  -1   79.85    3.67
   3  -7   1   85.10    3.30
   3   7   1   81.92    3.61
   3   7   1   82.59    4.50
  -3   7  -1   82.68    5.09
  -4  -7  -1   18.76    3.95
  -4  -7  -1   20.25    2.86
   4  -7   1   15.52    2.36
  -4   7  -1   23.60    5.02
   4   7   1   17.05    2.81
   4   7   1   15.15    2.91
  -5  -7  -1   -3.17    5.14
   5  -7   1    0.53    2.23
   5  -7   1    4.40    2.14
   5   7   1   -2.92    2.70
  -4  -8   1    1.57    2.12
   4  -8  -1   -0.58    1.47
  -4   8   1    1.98    3.20
   4   8  -1   -0.84    2.20
   4   8  -1   -3.98    2.34
   3  -8  -1   29.36    1.92
  -3  -8   1   29.65    3.06
   3  -8  -1   30.60    2.21
   3   8  -1   29.01    3.09
   3   8  -1   31.90    3.66
  -3   8   1   30.79    3.74
   3   8  -1   32.48    2.85
   2  -8  -1    9.21    1.25
   2  -8  -1    8.87    1.22
  -2  -8   1    8.37    0.91
  -2  -8   1   10.66    2.04
   2  -8  -1    7.97    1.16
  -2   8   1   11.02    2.07
   2   8  -1    8.77    1.98
   2   8  -1   11.80    1.81
   2   8  -1    9.40    2.00
   1  -8  -1  159.76    3.34
   1  -8  -1  160.02    3.57
  -1  -8   1  158.92    4.12
  -1  -8   1  160.71    3.05
  -1   8   1  152.35    5.03
   1   8  -1  153.05    5.29
  -1   8   1  156.85    3.84
   1   8  -1  158.31    3.59
   1   8  -1  156.79    5.30
   0  -8  -1   18.33    1.71
   0  -8  -1   19.61    1.22
   0  -8   1   18.22    1.23
   0  -8   1   19.88    1.67
   0   8  -1   20.10    3.30
   0   8   1   17.06    2.32
   0   8  -1   18.37    1.33
   0   8   1   16.29    1.44
   0   8  -1   19.76    2.86
  -1  -8  -1  414.06    6.42
   1  -8   1  409.98    7.41
  -1  -8  -1  408.92    8.17
   1  -8   1  419.58    6.74
   1   8   1  381.09    9.81
  -1   8  -1  412.40   10.72
  -1   8  -1  415.34    7.78
   1   8   1  408.16   10.27
   1   8   1  403.28    7.62
  -2  -8  -1    0.70    1.71
  -2  -8  -1    0.77    0.58
   2  -8   1    1.31    1.01
   2  -8   1    1.52    0.66
   2  -8   1    0.74    0.97
   2   8   1    0.09    1.00
   2   8   1    2.36    1.71
   2   8   1    3.13    1.77
  -2   8  -1   -0.44    1.59
   3  -8   1   32.78    2.07
   3  -8   1   33.31    2.40
  -3  -8  -1   34.00    3.20
   3   8   1   34.98    2.92
   3   8   1   34.21    3.69
  -3   8  -1   31.08    4.13
  -4  -8  -1   17.39    2.96
   4  -8   1   14.07    2.33
  -4  -8  -1   14.91    3.86
  -4   8  -1   19.94    4.39
   4   8   1   10.91    2.71
   4   8   1   11.52    2.85
  -4  -9   1    3.18    2.20
   4  -9  -1    1.36    1.61
   4   9  -1   -0.97    2.25
  -4   9   1    2.49    3.49
   4   9  -1    4.08    2.34
   3  -9  -1   25.30    2.01
  -3  -9   1   25.23    3.19
   3  -9  -1   26.45    2.20
   3   9  -1   24.64    3.79
   3   9  -1   27.05    3.10
  -3   9   1   23.38    3.80
   3   9  -1   24.29    3.15
  -2  -9   1    1.56    0.75
   2  -9  -1    2.16    1.03
   2  -9  -1    1.79    1.02
  -2  -9   1    1.80    1.88
   2  -9  -1    2.37    1.01
  -2   9   1    0.94    1.67
   2   9  -1    2.08    1.44
   2   9  -1    3.19    1.86
   2   9  -1    3.87    1.67
   1  -9  -1    0.27    1.05
   1  -9  -1    0.12    0.78
  -1  -9   1    0.03    0.69
  -1  -9   1    0.37    1.44
  -1   9   1   -1.09    1.27
   1   9  -1    2.01    2.09
  -1   9   1   -0.70    1.07
   1   9  -1    1.46    1.11
   1   9  -1    2.18    1.64
   0  -9   1   11.03    1.21
   0  -9   1   10.88    1.70
   0  -9  -1   11.23    1.76
   0  -9  -1   10.78    1.20
   0   9  -1    9.49    1.37
   0   9   1    8.96    1.46
   1  -9   1   67.04    2.16
  -1  -9  -1   67.57    2.76
   1  -9   1   66.92    2.24
  -1  -9  -1   69.05    1.94
  -1   9  -1   68.60    2.50
   1   9   1   70.12    4.40
   1   9   1   68.62    2.61
   1   9   1   67.88    3.27
  -1   9  -1   64.44    3.57
   2  -9   1    3.53    1.13
   2  -9   1    4.39    1.23
  -2  -9  -1    3.48    0.76
   2  -9   1    4.69    0.88
  -2  -9  -1    5.56    2.04
   2   9   1    5.66    1.92
   2   9   1    5.10    1.92
  -2   9  -1    3.02    1.94
   2   9   1    3.10    1.36
   3  -9   1   21.39    2.05
   3  -9   1   19.60    2.17
  -3  -9  -1   21.47    3.18
   3   9   1   25.06    3.86
   3   9   1   23.84    2.80
  -3   9  -1   19.48    4.42
   3   9   1   24.33    3.14
  -4  -9  -1    2.33    2.15
   4  -9   1    0.61    1.65
  -4   9  -1    3.82    3.38
   4   9   1    0.11    2.58
   4   9   1   -0.50    2.37
  -4 -10   1    6.97    2.52
   4 -10  -1    2.28    1.73
  -4  10   1    9.14    4.03
   4  10  -1    5.65    2.56
   4  10  -1    0.93    2.55
   3 -10  -1   35.30    2.48
   3 -10  -1   34.88    2.13
  -3 -10   1   34.68    3.50
   3  10  -1   35.48    3.07
  -3  10   1   36.99    4.49
   3  10  -1   30.73    3.91
   3  10  -1   33.76    3.62
   2 -10  -1    5.94    1.24
  -2 -10   1    4.97    0.92
   2 -10  -1    4.72    1.21
  -2 -10   1    5.65    2.10
   2 -10  -1    6.16    1.37
   2  10  -1    5.63    1.80
   2  10  -1    5.65    1.79
  -2  10   1    3.85    2.01
   2  10  -1    6.00    2.24
   1 -10  -1   68.00    2.27
  -1 -10   1   65.82    2.03
   1 -10  -1   66.63    2.47
  -1 -10   1   65.37    2.89
  -1  10   1   66.52    3.50
   1  10  -1   63.52    3.77
   1  10  -1   70.11    4.79
  -1  10   1   64.73    2.63
   1  10  -1   66.32    2.40
   0 -10  -1   19.48    1.40
   0 -10  -1   21.23    2.04
   0 -10   1   20.70    1.44
   0 -10   1   20.16    1.95
   0  10   1   19.79    1.71
   0  10  -1   20.50    1.53
   0  10  -1   25.28    3.92
   0  10   1   21.23    3.33
   1 -10   1   16.21    1.60
  -1 -10  -1   14.77    2.28
  -1 -10  -1   17.01    1.30
   1 -10   1   15.13    1.51
   1  10   1   16.79    2.55
   1  10   1   18.10    1.95
  -1  10  -1   15.33    2.96
   1  10   1   19.73    3.55
  -1  10  -1   15.88    1.72
   2 -10   1   13.32    1.36
   2 -10   1   11.44    1.64
   2 -10   1   11.27    1.43
  -2 -10  -1   12.33    2.39
  -2 -10  -1   10.50    1.15
  -2  10  -1   11.76    2.52
   2  10   1   15.31    2.25
   2  10   1   19.04    3.80
   2  10   1   10.81    2.23
   3 -10   1   72.50    3.33
  -3 -10  -1   73.10    4.08
   3 -10   1   69.59    2.75
  -3  10  -1   77.04    5.83
   3  10   1   70.33    5.09
   3  10   1   69.10    4.20
   3  10   1   74.94    3.83
   4 -10   1    2.11    1.76
  -4 -10  -1    5.82    2.55
   4  10   1   -1.78    2.44
  -4  10  -1    6.09    3.73
   4  10   1   -5.08    2.59
   4  10   1    5.29    2.25
   4 -11  -1   10.63    2.30
  -4 -11   1   13.19    2.84
  -4  11   1   17.96    4.71
   4  11  -1    3.51    3.01
   4  11  -1    9.24    3.04
   3 -11  -1   27.67    2.13
   3 -11  -1   30.29    2.45
  -3 -11   1   30.71    3.57
   3  11  -1   32.53    3.13
   3  11  -1   27.67    3.56
   3  11  -1   30.13    4.54
  -3  11   1   35.48    4.63
  -2 -11   1   23.49    1.51
   2 -11  -1   22.83    1.81
   2 -11  -1   23.57    1.90
  -2 -11   1   22.17    3.08
   2 -11  -1   23.68    1.81
  -2  11   1   23.37    3.63
   2  11  -1   22.91    3.13
   2  11  -1   31.20    4.06
   2  11  -1   22.06    2.41
   1 -11  -1   78.96    2.58
  -1 -11   1   78.89    3.48
  -1 -11   1   81.15    2.37
   1 -11  -1   77.53    2.81
   1  11  -1   76.31    2.70
  -1  11   1   77.76    3.94
   1  11  -1   78.29    5.27
   1  11  -1   78.14    4.59
  -1  11   1   76.49    2.97
   0 -11   1    7.21    1.67
   0 -11   1    5.38    1.05
   0 -11  -1    8.15    1.73
   0 -11  -1    8.19    1.17
   0  11   1    8.12    2.49
   0  11  -1    7.06    1.34
   0  11   1    7.19    1.46
   0  11  -1   13.05    2.94
  -1 -11  -1    3.25    1.85
   1 -11   1    4.71    1.20
  -1 -11  -1    3.77    0.95
   1 -11   1    3.61    1.37
   1  11   1    5.18    2.77
  -1  11  -1    3.55    2.00
  -1  11  -1    5.12    1.51
   1  11   1    4.81    2.05
   1  11   1    4.88    1.57
  -2 -11  -1    2.08    0.88
   2 -11   1    2.29    1.26
   2 -11   1    1.77    1.21
  -2 -11  -1    2.18    2.25
  -2  11  -1    0.93    2.13
   2  11   1    2.20    1.67
   2  11   1    5.52    2.60
   2  11   1    2.93    2.00
  -3 -11  -1   19.37    3.01
   3 -11   1   15.68    2.10
   3 -11   1   15.86    1.87
   3  11   1   19.19    3.06
   3  11   1   11.67    2.97
   3  11   1   13.79    3.07
  -3  11  -1   21.13    4.81
   4 -11   1    1.87    1.80
  -4 -11  -1    4.69    2.65
   4  11   1    2.22    2.24
   4  11   1   -2.93    2.66
  -4  11  -1    7.30    3.72
  -4 -12   1    1.61    2.69
   4 -12  -1   -0.23    1.66
  -4  12   1    7.30    4.14
   4  12  -1   -0.99    2.56
   3 -12  -1   19.36    2.22
   3 -12  -1   17.87    2.21
  -3 -12   1   22.61    3.24
   3  12  -1   25.12    2.90
   3  12  -1   15.64    3.33
  -3  12   1   24.17    4.85
   3  12  -1   17.26    3.34
   2 -12  -1    2.08    1.42
  -2 -12   1    1.65    2.29
   2 -12  -1    1.87    1.26
  -2 -12   1    1.09    0.99
   2  12  -1    2.41    1.79
   2  12  -1    1.08    2.11
  -2  12   1    1.55    2.11
   2  12  -1    7.09    2.88
   1 -12  -1   13.22    1.52
  -1 -12   1   13.29    1.46
   1 -12  -1   13.07    2.12
  -1 -12   1   14.30    2.42
   1  12  -1   12.92    1.89
  -1  12   1   14.12    2.35
   1  12  -1   15.96    3.67
   1  12  -1   21.23    4.04
  -1  12   1   12.81    2.00
   0 -12   1    1.16    1.05
   0 -12   1    1.10    1.62
   0 -12  -1    2.00    1.80
   0 -12  -1    0.87    0.99
   0  12  -1    0.53    1.18
   0  12   1   -1.41    2.55
   0  12  -1    5.74    2.85
   0  12   1    0.13    1.34
  -1 -12  -1   68.15    3.63
   1 -12   1   70.99    2.64
  -1 -12  -1   68.38    2.33
   1 -12   1   68.27    2.78
  -1  12  -1   70.04    4.91
   1  12   1   76.19    6.53
   1  12   1   66.86    3.00
  -1  12  -1   69.66    2.94
   1  12   1   64.71    4.21
  -2 -12  -1    3.44    2.47
   2 -12   1    3.91    1.44
  -2 -12  -1    4.69    1.06
   2 -12   1    4.90    1.41
   2  12   1   10.15    3.07
   2  12   1    5.19    2.17
   2  12   1    3.30    2.07
  -2  12  -1    3.58    2.47
   3 -12   1    9.82    1.83
  -3 -12  -1    9.39    2.83
   3 -12   1    8.28    1.75
  -3  12  -1   17.49    4.12
   3  12   1   12.03    2.57
   3  12   1    8.30    2.90
   3  12   1    7.01    2.27
  -4 -12  -1    9.15    2.86
   4 -12   1    4.26    1.98
  -4  12  -1   11.00    4.33
   4 -13  -1    0.88    1.80
  -4 -13   1    5.18    2.85
  -4  13   1   10.77    4.55
   3 -13  -1    6.77    1.77
   3 -13  -1    5.44    1.65
  -3 -13   1   11.02    2.94
   3  13  -1    8.34    3.09
  -3  13   1   11.13    3.31
   3  13  -1    3.47    2.46
  -2 -13   1   11.36    2.69
   2 -13  -1   10.64    1.67
  -2 -13   1   11.41    1.39
   2  13  -1   11.08    2.86
   2  13  -1   11.89    3.23
   2  13  -1   12.96    2.14
  -2  13   1   12.09    2.95
  -1 -13   1   53.48    3.50
   1 -13  -1   57.37    2.96
   1 -13  -1   59.17    2.54
  -1 -13   1   54.39    2.23
   1  13  -1   54.80    2.66
  -1  13   1   60.07    2.81
   1  13  -1   60.15    7.28
   1  13  -1   54.02    4.72
  -1  13   1   56.69    3.95
   1 -13   1   54.52    2.88
  -1 -13  -1   55.26    2.28
  -1 -13  -1   53.19    3.55
   1 -13   1   55.61    2.52
   1  13   1   55.10    7.20
  -1  13  -1   52.37    4.68
  -1  13  -1   52.02    2.77
   1  13   1   51.56    4.32
   1  13   1   52.90    2.90
  -2 -13  -1    4.26    2.64
   2 -13   1    4.82    1.55
  -2 -13  -1    5.55    1.21
   2 -13   1    6.00    1.56
   2  13   1    4.10    2.33
   2  13   1    7.91    2.29
   2  13   1    9.66    3.26
  -2  13  -1    6.63    2.76
  -3 -13  -1    3.32    2.73
   3 -13   1    0.72    1.48
  -3  13  -1    8.44    3.98
   3  13   1    0.59    2.89
   3  13   1    0.06    2.21
   3  13   1    4.56    2.33
   4 -13   1    2.27    1.90
  -4 -13  -1    5.54    2.90
  -4  13  -1    8.68    4.11
  -4 -14   1    6.11    3.03
   4 -14  -1    1.48    1.81
  -4  14   1   11.23    4.58
   3 -14  -1   11.03    2.01
   3 -14  -1    7.57    1.76
  -3 -14   1   13.26    3.15
   3  14  -1    4.13    2.73
   3  14  -1    7.83    3.31
   2 -14  -1    4.39    1.52
  -2 -14   1    7.66    2.58
  -2 -14   1    5.20    1.29
   2  14  -1    4.30    2.72
   2  14  -1    7.82    3.27
  -2  14   1    7.30    2.78
   2  14  -1    8.41    1.92
   1 -14  -1    3.15    1.88
  -1 -14   1    4.72    1.36
   1 -14  -1    4.28    1.37
  -1 -14   1    3.99    2.46
   1  14  -1    5.25    1.68
  -1  14   1    4.78    1.87
   1  14  -1    5.76    3.00
  -1  14   1    3.79    2.28
   1  14  -1    5.55    4.31
   0 -14   1   21.36    2.79
   0 -14  -1   23.62    1.99
   0 -14   1   23.29    2.00
   0 -14  -1   23.20    2.90
   0  14  -1   28.30    6.41
   0  14  -1   22.20    2.08
   0  14   1   22.19    2.29
  -1 -14  -1    9.69    1.43
   1 -14   1   10.39    1.67
   1 -14   1    9.82    2.03
  -1 -14  -1    8.11    2.37
   1  14   1   11.45    4.52
   1  14   1   10.94    2.73
  -1  14  -1   12.48    3.04
  -1  14  -1   10.69    2.02
   1  14   1   13.34    2.16
  -2 -14  -1    7.58    2.77
   2 -14   1    3.78    1.47
   2 -14   1    3.35    1.58
  -2 -14  -1    2.54    1.14
   2  14   1    3.00    3.10
   2  14   1    0.52    2.47
   2  14   1    4.59    2.06
  -2  14  -1    5.37    2.78
  -3 -14  -1   12.95    3.25
   3 -14   1    8.45    1.92
   3 -14   1   12.31    2.15
  -3  14  -1   21.96    4.86
   3  14   1    8.31    3.38
   3  14   1   14.77    2.70
  -4 -14  -1    7.25    3.14
  -4  14  -1   11.08    4.55
   3 -15  -1    3.34    1.72
  -3 -15   1   10.66    3.23
   3 -15  -1    6.06    1.89
   3  15  -1    2.51    3.37
  -2 -15   1   26.98    3.77
   2 -15  -1   26.17    2.38
  -2 -15   1   22.41    1.92
   2  15  -1   18.12    3.75
   2  15  -1   25.89    2.46
   2  15  -1   19.49    3.57
  -1 -15   1   26.26    3.59
   1 -15  -1   24.91    2.25
  -1 -15   1   25.66    2.17
   1 -15  -1   24.03    2.86
   1  15  -1   25.33    5.49
   1  15  -1   24.34    2.42
  -1  15   1   23.66    2.62
  -1  15   1   26.89    3.89
   1  15  -1   27.18    4.45
   0 -15   1   15.34    2.59
   0 -15  -1   16.44    1.87
   0 -15  -1   14.88    2.65
   0 -15   1   14.45    2.03
   0  15   1   17.31    4.25
   0  15  -1   13.07    2.07
   0  15  -1   18.91    5.88
   0  15   1   16.46    2.25
   1 -15   1    9.82    2.11
   1 -15   1    6.17    1.45
  -1 -15  -1    8.92    2.80
  -1 -15  -1    5.83    1.40
  -1  15  -1    8.27    2.09
  -1  15  -1    8.27    3.15
   1  15   1    7.71    2.66
   1  15   1    5.91    4.62
   1  15   1    8.13    2.15
  -2 -15  -1    1.81    1.20
   2 -15   1    2.57    1.59
   2 -15   1    4.56    1.65
  -2 -15  -1    2.35    2.44
  -2  15  -1    5.23    2.85
   2  15   1    2.87    3.29
   2  15   1    4.70    2.05
   3 -15   1   -2.64    1.56
  -3 -15  -1    2.00    2.87
   3 -15   1    0.13    1.54
   3  15   1    2.60    2.38
  -3  15  -1   10.98    4.49
   3  15   1   -2.20    3.15
   3 -16  -1   -3.60    1.57
   3 -16  -1    1.00    1.57
  -3 -16   1    0.94    3.02
   3  16  -1   -4.36    3.29
  -3  16   1    7.57    3.25
  -2 -16   1   11.35    2.98
  -2 -16   1    5.89    1.52
   2 -16  -1    7.94    1.86
   2  16  -1    8.20    3.83
   2  16  -1   10.76    2.06
  -1 -16   1    0.78    1.37
   1 -16  -1    1.06    1.97
   1 -16  -1    1.47    1.43
  -1 -16   1    0.90    2.56
   1  16  -1    1.68    1.60
  -1  16   1    4.91    2.24
   1  16  -1    5.74    4.80
  -1  16   1    0.56    1.78
   1  16  -1   -1.13    2.76
   0 -16   1    3.11    1.44
   0 -16   1    5.41    2.32
   0 -16  -1    4.36    1.53
   0 -16  -1    4.37    2.36
   0  16   1   -2.13    4.11
   0  16   1    4.75    1.79
   0  16  -1    2.89    1.75
  -1 -16  -1    1.57    1.29
  -1 -16  -1    1.26    2.57
   1 -16   1    2.71    1.93
   1 -16   1    1.45    1.48
  -1  16  -1    6.32    3.00
  -1  16  -1    3.63    1.81
   1  16   1    2.68    1.84
   1  16   1    5.41    4.74
  -2 -16  -1    0.14    1.29
  -2 -16  -1    4.07    2.98
   2 -16   1    0.76    1.59
   2 -16   1    2.65    1.52
   2  16   1    4.58    1.98
   2  16   1    1.90    3.34
  -2  16  -1    6.98    3.30
  -3 -16  -1    1.23    3.11
   3 -16   1    1.05    1.63
   3  16   1   -5.33    3.44
   3 -17  -1   15.78    2.41
   3 -17  -1   17.25    2.49
  -3 -17   1   25.75    4.11
   2 -17  -1   -0.05    1.62
  -2 -17   1    2.57    2.84
  -2 -17   1   -0.42    1.35
   2  17  -1    3.20    3.94
  -2  17   1    7.57    2.96
   1 -17  -1   38.15    2.69
  -1 -17   1   34.53    2.56
   1 -17  -1   35.59    3.18
  -1 -17   1   35.78    3.89
  -1  17   1   36.76    3.04
   1  17  -1   46.26    8.40
   1  17  -1   38.05    2.77
   1  17  -1   27.14    4.96
   0 -17  -1   41.74    2.64
   0 -17   1   40.05    2.66
   0 -17  -1   43.99    3.83
   0 -17   1   43.58    3.75
   0  17  -1   43.27    2.78
   0  17   1   43.17    2.98
  -1 -17  -1   13.34    2.82
   1 -17   1   11.37    2.05
  -1 -17  -1   10.93    1.72
   1 -17   1   12.26    2.31
   1  17   1   12.39    5.03
  -1  17  -1   11.81    2.25
  -1  17  -1   23.07    5.10
   1  17   1   12.98    2.28
   2 -17   1   21.81    2.65
  -2 -17  -1   28.23    4.56
  -2 -17  -1   22.49    2.17
   2 -17   1   26.32    2.49
   2  17   1   29.39    2.92
   2  17   1   21.19    4.52
  -3 -17  -1    3.57    3.24
   3 -17   1    0.93    1.75
  -3 -18   1    5.73    3.49
  -3  18   1    7.93    3.35
  -2 -18   1    3.90    3.17
   2 -18  -1   -1.67    1.68
   2  18  -1    3.88    4.15
   1 -18  -1    6.63    1.86
  -1 -18   1    6.40    1.71
   1 -18  -1    8.73    2.39
  -1 -18   1   10.55    2.90
   1  18  -1    9.01    2.01
   1  18  -1   12.82    5.15
  -1  18   1    9.33    2.29
   0 -18   1   36.66    3.52
   0 -18  -1   33.52    2.79
   0 -18   1   32.16    2.70
   0 -18  -1   36.91    3.95
   0  18  -1   47.01    6.82
   0  18  -1   34.70    2.93
   0  18   1   33.94    2.92
  -1 -18  -1    2.08    1.50
   1 -18   1    4.15    2.16
  -1 -18  -1    3.03    2.88
   1 -18   1    0.69    1.70
   1  18   1    5.86    4.40
  -1  18  -1    8.44    3.08
  -1  18  -1    4.43    1.99
   1  18   1    5.25    1.99
  -2 -18  -1   23.56    3.80
   2 -18   1   18.13    2.39
   2 -18   1   17.05    2.39
   2  18   1   15.96    4.92
   2  18   1   23.50    2.97
  -3 -18  -1    3.65    3.49
  -2 -19   1   37.35    4.34
   2 -19  -1   29.44    3.07
   2 -19  -1   32.62    2.85
   2  19  -1   27.03    5.66
  -1 -19   1    8.88    2.92
  -1 -19   1    4.47    1.80
   1 -19  -1    5.21    1.90
   1 -19  -1   10.69    2.58
   1  19  -1   10.64    2.07
  -1  19   1   11.09    2.51
   0 -19  -1   10.52    2.01
   0 -19  -1   13.08    3.04
   0 -19   1   10.41    2.11
   0 -19   1   14.29    2.94
   0  19  -1   15.68    2.42
   0  19   1   14.40    2.43
   1 -19   1    6.15    2.30
  -1 -19  -1    2.20    1.72
   1 -19   1    2.22    1.86
  -1 -19  -1    5.30    2.92
  -1  19  -1    6.36    2.19
   1  19   1    7.33    2.24
   2 -19   1    0.60    1.91
   2 -19   1    3.89    1.75
  -2 -19  -1    6.17    3.11
   2  19   1    4.55    4.78
  -2 -20   1   18.37    3.88
   2 -20  -1    8.98    2.30
   2 -20  -1   12.73    2.38
   2  20  -1    8.78    5.19
   1 -20  -1   -0.72    1.78
  -1 -20   1    2.24    2.86
  -1 -20   1   -3.44    1.68
   1 -20  -1    1.18    2.32
   1  20  -1    3.51    1.80
  -1  20   1    1.87    2.16
   0 -20  -1    9.66    3.01
   0 -20   1    8.93    2.79
   0 -20   1    3.28    1.91
   0  20   1   10.00    2.34
   0  20  -1    7.89    2.18
  -1 -20  -1    2.49    3.12
   1  20   1    3.59    2.12
  -1  20  -1    4.16    2.15
  -2 -20  -1    7.83    3.48
   2 -20   1    5.26    1.99
   2  20   1    2.41    5.22
   1 -21  -1   -0.97    1.93
  -1 -21   1    4.29    3.10
  -1 -21   1   -3.71    1.82
  -1  21   1    4.75    2.38
   0 -21  -1   -0.12    1.87
   0 -21  -1    7.06    2.91
   0 -21   1   -0.13    1.88
   0 -21   1    2.95    2.76
   0  21  -1    6.03    2.22
   0  21   1    5.87    2.26
   1 -21   1   -4.15    1.86
  -1 -21  -1    1.35    3.06
  -1 -21  -1   -4.36    1.74
   1  21   1    4.49    2.07
  -1  21  -1    0.26    2.15
  -1 -22   1    4.10    3.10
  -1  22   1    2.26    2.41
   0 -22  -1   18.12    3.45
   0 -22   1   12.02    2.59
   0 -22   1   21.29    3.41
   0 -22  -1   12.97    2.49
   0  22   1   21.20    3.19
   0  22  -1   22.79    3.23
  -1 -22  -1   -0.26    3.20
   1 -22   1   -4.86    1.95
  -1 -22  -1   -4.65    1.87
  -1  22  -1    1.64    2.31
   1  22   1    3.73    2.19
  -5   0   2    0.78    3.68
   5   0  -2   -2.87    1.72
  -4   0   2   94.82    5.99
   4   0  -2   88.84    3.50
   4   0  -2   88.98    4.75
  -3   0   2   -0.50    1.45
  -3   0   2    0.53    1.02
   3   0  -2   -0.21    0.98
   3   0  -2   -0.07    0.97
   2   0  -2   33.84    0.79
   2   0  -2   32.76    1.42
   2   0  -2   32.66    1.94
  -2   0   2   33.65    2.47
  -2   0   2   31.20    1.47
  -1   0   2   -1.19    0.67
  -1   0   2   -0.85    0.39
   1   0  -2   -0.62    0.51
   1   0  -2   -0.34    0.44
  -1   0   2   -0.79    0.84
   0   0   2    4.28    0.38
   0   0   2    3.97    0.42
   0   0   2    3.58    0.39
   0   0  -2    4.11    0.69
   1   0   2   -0.30    0.50
   1   0   2    0.34    0.53
   1   0   2    0.50    0.73
  -1   0  -2    0.85    0.64
   2   0   2   10.73    1.45
  -2   0  -2   10.47    1.12
  -2   0  -2   11.16    1.90
   2   0   2   11.54    1.30
   2   0   2   11.97    0.85
   3   0   2    0.52    1.30
   3   0   2    0.28    0.93
  -3   0  -2    0.15    1.54
   3   0   2    0.54    0.63
  -3   0  -2   -0.39    0.94
   4   0   2   -0.07    1.85
  -4   0  -2    3.28    2.58
   4   0   2   -0.46    1.39
  -5   0  -2    0.22    3.47
   5   0   2   -2.68    1.73
   5  -1  -2    2.81    2.09
  -5  -1   2    9.80    4.48
   5  -1  -2    2.89    2.33
   5   1  -2    3.23    2.23
  -5   1   2    8.62    4.05
   4  -1  -2   68.11    3.12
   4  -1  -2   70.25    4.25
  -4  -1   2   72.17    5.45
   4   1  -2   68.49    4.27
  -4   1   2   70.17    5.50
   4   1  -2   65.52    3.22
  -3  -1   2    7.62    1.39
   3  -1  -2    6.27    1.42
   3  -1  -2    8.36    1.40
   3  -1  -2    5.63    0.77
  -3  -1   2    7.19    2.04
   3   1  -2    7.91    1.51
  -3   1   2    7.12    1.94
  -3   1   2    7.57    1.17
   3   1  -2    9.38    1.43
   2  -1  -2  144.56    3.32
   2  -1  -2  146.70    2.38
  -2  -1   2  143.54    5.03
  -2  -1   2  138.74    3.34
   2  -1  -2  144.22    4.38
   2   1  -2  144.53    4.39
  -2   1   2  141.04    5.00
  -2   1   2  139.87    3.12
   2   1  -2  144.08    3.21
   1  -1  -2  101.89    2.18
  -1  -1   2  101.99    3.30
  -1  -1   2   98.64    2.36
  -1  -1   2  104.60    1.63
  -1   1   2  103.49    2.23
  -1   1   2  103.84    1.80
  -1   1   2  101.11    3.30
   1   1  -2  103.33    2.03
   1   1  -2  103.63    2.87
   0  -1  -2    1.82    0.41
   0  -1   2    1.61    0.32
   0  -1   2    1.81    0.25
   0  -1   2    1.14    0.34
   0   1   2    1.28    0.34
   0   1   2    1.59    0.44
   0   1   2    1.01    0.53
   0   1  -2    0.95    0.52
   0   1   2    1.70    0.51
   0   1  -2    1.62    0.71
  -1  -1  -2   97.82    2.24
   1  -1   2   96.44    2.27
  -1  -1  -2   97.74    3.15
   1  -1   2   99.50    1.83
   1   1   2   99.50    1.73
  -1   1  -2   92.23    3.33
  -1   1  -2   96.91    1.87
   1   1   2   98.79    2.33
   1   1   2   98.56    2.73
  -2  -1  -2  198.49    4.14
   2  -1   2  200.37    3.30
   2  -1   2  201.12    4.43
   2  -1   2  196.76    5.45
  -2  -1  -2  202.50    6.21
  -2   1  -2  200.22    6.32
   2   1   2  198.66    5.43
  -2   1  -2  197.74    3.77
   2   1   2  202.40    4.44
   2   1   2  206.11    3.13
  -3  -1  -2    0.19    1.55
   3  -1   2    0.28    0.75
  -3  -1  -2    1.17    1.17
   3  -1   2    0.17    0.93
   3  -1   2    0.08    1.28
  -3   1  -2    0.99    0.83
   3   1   2    0.64    1.37
  -3   1  -2    0.14    1.58
   3   1   2    0.19    0.97
  -4  -1  -2   21.88    4.29
   4  -1   2   15.66    2.46
   4  -1   2   18.01    2.83
   4   1   2   18.05    3.03
   4   1   2   17.33    2.73
  -4   1  -2   20.96    4.36
   5  -1   2    3.03    2.09
   5  -1   2   -2.75    2.47
  -5  -1  -2    6.51    4.02
   5   1   2   -5.09    2.49
   5   1   2    0.82    2.16
  -5   1  -2    7.62    4.13
  -5  -2   2   -0.75    4.38
   5  -2  -2   -0.53    1.74
   5  -2  -2   -3.49    1.90
  -5   2   2    3.91    3.78
   5   2  -2   -2.81    1.98
   4  -2  -2    7.78    1.84
   4  -2  -2   10.98    1.96
  -4  -2   2   11.24    3.10
   4   2  -2    8.38    1.97
  -4   2   2    8.49    2.79
   4   2  -2    6.81    1.94
   3  -2  -2    0.69    0.89
   3  -2  -2    0.97    1.05
   3  -2  -2    1.14    0.64
  -3  -2   2    1.69    1.28
  -3  -2   2    0.81    1.55
   3   2  -2    1.04    1.16
  -3   2   2    1.62    0.91
   3   2  -2    1.07    1.20
  -3   2   2    0.30    1.46
   2  -2  -2  547.52    7.79
  -2  -2   2  524.81    9.75
  -2  -2   2  535.20   13.64
   2  -2  -2  552.89    9.57
   2   2  -2  538.72    9.30
  -2   2   2  540.80   13.64
   2   2  -2  535.10   12.07
  -2   2   2  534.54    9.37
  -1  -2   2    2.95    1.03
  -1  -2   2    3.22    0.40
  -1  -2   2    2.12    0.91
   1   2  -2    4.88    0.68
  -1   2   2    4.18    0.71
   1   2  -2    2.81    0.74
  -1   2   2    2.54    0.76
  -1   2   2    1.92    0.91
   0  -2   2  344.91    5.73
   0  -2  -2  357.41    5.98
   0  -2   2  348.43    6.17
   0  -2   2  363.25    4.97
   0   2   2  343.23    5.75
   0   2   2  345.40    4.97
   0   2   2  322.67    7.35
   0   2  -2  317.11    8.17
  -1  -2  -2   29.78    1.66
  -1  -2  -2   31.31    1.43
   1  -2   2   32.49    1.14
   1  -2   2   29.55    1.24
   1   2   2   33.44    1.47
   1   2   2   32.07    1.57
   1   2   2   30.15    0.96
  -1   2  -2   26.13    2.17
  -2  -2  -2    2.65    1.17
  -2  -2  -2    3.84    1.11
   2  -2   2    4.16    0.73
   2  -2   2    4.24    1.05
   2   2   2    3.03    0.97
  -2   2  -2    3.78    0.52
  -2   2  -2    2.81    1.39
   2   2   2    4.81    1.19
   2   2   2    3.57    0.50
   3  -2   2   -0.27    0.92
  -3  -2  -2   -1.30    1.43
   3  -2   2    0.12    0.82
   3  -2   2   -0.33    1.19
  -3  -2  -2    0.09    1.24
  -3   2  -2   -0.36    1.59
   3   2   2    0.27    1.11
   3   2   2    1.33    1.52
   4  -2   2  113.34    5.30
  -4  -2  -2  120.31    6.64
   4  -2   2  110.12    4.24
   4   2   2  110.57    4.29
  -4   2  -2  120.62    7.11
   4   2   2  110.74    5.43
   5  -2   2   -1.79    1.75
  -5  -2  -2   -0.47    3.25
  -5   2  -2    5.06    4.30
  -5  -3   2   11.10    5.62
   5  -3  -2    5.70    2.17
   5  -3  -2    3.70    2.20
   5   3  -2    2.83    2.47
  -5   3   2    7.86    4.23
  -4  -3   2   20.49    3.78
   4  -3  -2   15.24    2.47
  -4  -3   2   19.06    2.29
   4  -3  -2   16.12    2.11
  -4   3   2   19.37    4.19
   4   3  -2   18.97    2.42
   4   3  -2   12.62    2.35
  -3  -3   2    6.19    1.55
   3  -3  -2    4.07    1.19
   3  -3  -2    6.85    1.37
   3  -3  -2    5.27    0.81
  -3  -3   2    5.85    1.98
   3   3  -2    5.79    1.43
  -3   3   2    4.14    1.76
  -3   3   2    6.00    1.04
   3   3  -2    4.56    1.43
  -2  -3   2   37.51    2.65
   2  -3  -2   37.55    1.63
   2  -3  -2   36.66    1.22
  -2  -3   2   37.38    1.91
  -2   3   2   36.05    1.37
   2   3  -2   39.22    1.65
   2   3  -2   39.09    2.24
  -2   3   2   34.40    2.53
  -1  -3   2   40.14    1.65
   1  -3  -2   43.41    1.25
  -1  -3   2   45.72    1.03
   1   3  -2   39.28    2.10
  -1   3   2   39.80    2.08
   1   3  -2   45.68    1.35
   1   3  -2   46.83    2.05
  -1   3   2   42.75    1.58
  -1   3   2   44.85    1.48
   0  -3   2    3.34    0.56
   0  -3   2    2.14    0.67
   0  -3  -2    3.84    0.74
   0   3   2    2.57    0.88
   0   3   2    2.70    0.58
   0   3   2    3.17    1.51
   0   3  -2    2.24    1.48
   0   3  -2    4.54    1.48
   0   3  -2    2.40    0.48
  -1  -3  -2  200.42    5.08
   1  -3   2  193.78    3.28
   1  -3   2  190.84    3.84
  -1  -3  -2  189.60    4.01
  -1   3  -2  186.15    5.56
   1   3   2  190.55    3.92
   1   3   2  200.05    4.83
   1   3   2  197.01    3.07
   2  -3   2    8.94    1.21
  -2  -3  -2    9.50    1.78
   2  -3   2    9.24    1.05
  -2  -3  -2    9.31    1.56
   2   3   2    9.59    0.63
   2   3   2   10.69    1.49
  -2   3  -2    9.01    1.76
   2   3   2    9.95    1.62
  -3  -3  -2   27.24    2.26
   3  -3   2   28.09    2.06
   3  -3   2   27.75    1.51
  -3  -3  -2   26.53    3.06
   3  -3   2   25.28    2.26
   3   3   2   26.78    2.26
  -3   3  -2   26.46    3.17
   3   3   2   27.10    2.62
   4  -3   2    0.94    1.42
  -4  -3  -2    1.92    2.40
   4  -3   2    1.97    1.79
   4   3   2    0.46    1.76
   4   3   2   -0.56    1.97
  -4   3  -2    3.32    2.72
   5  -3   2   -0.13    1.88
  -5  -3  -2   -0.80    3.61
   5   3   2   -2.72    2.16
  -5   3  -2    5.19    4.37
  -5  -4   2   -4.05    5.04
   5  -4  -2    0.05    1.78
   5  -4  -2   -2.53    1.89
  -5   4   2    2.57    3.83
   5   4  -2   -2.04    1.95
  -4  -4   2   25.90    4.97
  -4  -4   2   27.31    2.50
   4  -4  -2   23.66    2.74
   4  -4  -2   24.72    2.30
   4   4  -2   24.17    3.42
  -4   4   2   29.71    4.54
   4   4  -2   19.51    2.49
  -3  -4   2    0.88    1.64
   3  -4  -2    0.90    1.05
  -3  -4   2    1.07    1.51
   3  -4  -2    0.19    0.77
  -3   4   2    1.63    0.96
   3   4  -2    1.70    1.36
   3   4  -2    2.04    1.40
  -3   4   2    0.18    1.55
  -2  -4   2    7.99    1.38
   2  -4  -2    7.03    0.91
   2  -4  -2    6.97    1.07
  -2  -4   2    7.01    1.56
   2   4  -2    7.89    1.26
  -2   4   2    5.77    1.01
   2   4  -2    6.79    1.33
  -2   4   2    6.37    1.46
   1  -4  -2   14.21    1.10
  -1  -4   2   13.41    1.55
  -1  -4   2   17.45    0.83
   1  -4  -2   14.52    1.00
   1   4  -2   14.69    1.70
   1   4  -2   19.83    1.88
   1   4  -2   18.17    1.21
  -1   4   2   14.01    1.14
  -1   4   2   12.98    1.66
   0  -4   2   18.49    0.98
   0  -4  -2   19.14    1.30
   0  -4   2   16.45    1.23
   0   4   2   14.63    1.36
   0   4  -2   13.46    2.46
   0   4   2   16.81    0.95
   0   4   2   12.89    2.25
   0   4  -2   17.15    0.89
   0   4   2   16.08    1.20
   1  -4   2   36.19    1.44
  -1  -4  -2   35.72    1.83
   1  -4   2   34.88    0.93
  -1  -4  -2   36.15    1.80
   1  -4   2   37.90    1.33
   1   4   2   38.83    2.14
   1   4   2   35.78    1.85
  -1   4  -2   30.79    2.50
   1   4   2   35.18    1.14
  -2  -4  -2   14.18    1.87
   2  -4   2   13.91    1.18
   2  -4   2   13.98    1.34
  -2  -4  -2   14.48    1.76
   2   4   2   13.44    0.71
   2   4   2   15.55    1.68
  -2   4  -2   12.44    2.02
   2   4   2   14.35    1.85
  -3  -4  -2   12.25    1.88
   3  -4   2   13.10    1.42
  -3  -4  -2   10.59    2.41
   3  -4   2   13.98    1.74
   3   4   2   13.93    2.40
  -3   4  -2   13.88    2.62
   3   4   2   14.20    2.13
  -4  -4  -2    1.07    2.23
   4  -4   2    0.45    1.33
   4  -4   2    0.93    1.65
   4   4   2    0.28    2.04
   4   4   2   -1.14    1.68
  -4   4  -2    1.98    2.82
  -5  -4  -2    0.61    4.42
   5  -4   2   -4.48    2.13
   5  -4   2    0.11    1.87
  -5   4  -2    5.73    4.23
   5  -5  -2    8.87    2.44
   5  -5  -2    8.42    2.44
  -5  -5   2   13.77    6.42
   5   5  -2    2.45    2.58
  -5   5   2   14.18    4.91
  -4  -5   2   49.43    5.68
   4  -5  -2   50.98    2.93
   4  -5  -2   49.27    3.70
  -4  -5   2   50.63    3.16
  -4   5   2   55.94    5.33
   4   5  -2   46.76    3.85
   4   5  -2   43.05    3.03
  -3  -5   2    4.65    2.07
  -3  -5   2    3.50    1.68
   3  -5  -2    4.18    1.33
   3  -5  -2    4.90    0.97
  -3   5   2    4.93    1.96
   3   5  -2    5.98    1.63
   3   5  -2    2.98    1.55
   2  -5  -2   24.08    1.41
  -2  -5   2   25.37    1.96
  -2  -5   2   23.49    0.75
   2  -5  -2   24.72    1.24
  -2  -5   2   24.64    2.38
  -2   5   2   23.66    2.30
   2   5  -2   23.64    2.08
   2   5  -2   27.10    1.69
   1  -5  -2  103.01    2.45
  -1  -5   2  106.60    2.00
   1  -5  -2  100.50    2.21
  -1  -5   2  102.13    2.94
  -1   5   2  101.23    2.70
  -1   5   2   99.69    3.52
   1   5  -2  103.48    3.68
   1   5  -2  101.57    2.40
   1   5  -2  105.72    3.62
   0  -5  -2   92.81    2.50
   0  -5   2   94.92    2.43
   0  -5   2   97.22    2.05
   0  -5  -2   94.79    1.98
   0   5   2   97.50    4.90
   0   5  -2   96.10    2.15
   0   5   2   95.88    2.50
   0   5   2   89.44    2.73
   0   5  -2   96.90    4.10
   1  -5   2  159.82    3.02
   1  -5   2  161.50    2.95
   1  -5   2  161.10    3.44
  -1  -5  -2  155.34    3.75
   1   5   2  157.74    4.55
   1   5   2  155.78    2.77
  -1   5  -2  159.11    5.08
   1   5   2  150.21    3.63
   2  -5   2  152.06    3.81
   2  -5   2  153.42    3.08
  -2  -5  -2  151.37    2.51
  -2  -5  -2  150.36    3.96
  -2  -5  -2  156.05    5.14
   2   5   2  154.83    4.91
  -2   5  -2  149.76    5.50
   2   5   2  151.81    3.84
   3  -5   2   16.55    1.71
  -3  -5  -2   16.92    2.83
   3  -5   2   16.92    1.56
  -3  -5  -2   15.28    2.43
   3   5   2   17.84    2.35
   3   5   2   16.76    2.63
  -3   5  -2   14.26    3.15
  -4  -5  -2   12.88    2.12
   4  -5   2    9.49    2.02
  -4  -5  -2   12.29    3.18
   4  -5   2    9.89    2.08
  -4   5  -2   15.32    3.76
   4   5   2    7.22    2.31
   4   5   2    8.68    2.47
   5  -5   2    1.99    1.96
   5  -5   2   -1.98    2.23
  -5  -5  -2    0.31    5.14
   5   5   2   -2.73    2.36
  -5   5  -2    9.28    4.65
   5  -6  -2    1.37    2.12
  -5  -6   2   -0.32    6.12
   5  -6  -2    3.89    2.08
   5   6  -2   -0.24    2.56
  -5   6   2    8.36    4.47
  -4  -6   2   23.39    2.64
   4  -6  -2   22.23    2.35
  -4  -6   2   25.42    5.78
   4   6  -2   17.40    2.86
  -4   6   2   26.68    4.75
   4   6  -2   20.53    3.53
   3  -6  -2    0.18    1.13
  -3  -6   2    0.64    1.73
  -3  -6   2    0.33    1.80
   3  -6  -2    0.28    0.93
   3   6  -2    1.19    1.65
  -3   6   2    0.21    1.73
   3   6  -2    1.88    1.55
  -2  -6   2  172.48    4.51
   2  -6  -2  176.84    3.45
   2  -6  -2  174.13    4.18
  -2  -6   2  171.11    2.80
   2  -6  -2  171.37    3.53
  -2   6   2  172.78    5.90
   2   6  -2  165.56    3.86
   2   6  -2  172.55    5.48
   2   6  -2  170.06    5.73
  -1  -6   2   18.90    0.97
  -1  -6   2   18.57    1.76
   1  -6  -2   19.82    1.24
   1  -6  -2   17.79    1.13
  -1   6   2   16.85    1.71
   1   6  -2   19.02    1.99
   1   6  -2   17.84    1.32
   1   6  -2   23.44    2.56
   0  -6  -2   60.63    1.65
   0  -6  -2   58.12    2.01
   0  -6   2   62.05    1.70
   0  -6   2   59.52    2.07
   0   6  -2   58.83    3.72
   0   6   2   56.95    2.05
   0   6  -2   48.99    4.25
   0   6   2   57.40    2.46
   0   6  -2   60.09    1.78
   0   6   2   62.00    4.75
   1  -6   2    3.44    0.86
  -1  -6  -2    3.11    0.60
  -1  -6  -2    3.80    1.15
   1  -6   2    3.14    0.80
   1  -6   2    3.28    0.74
  -1   6  -2    2.59    1.54
   1   6   2    3.31    1.41
   1   6   2    4.20    1.29
   1   6   2    2.74    0.82
   2  -6   2   15.05    1.43
   2  -6   2   15.39    1.29
  -2  -6  -2   16.85    2.01
  -2  -6  -2   15.02    0.79
  -2  -6  -2   15.31    1.98
   2   6   2   17.30    2.29
  -2   6  -2   13.60    2.43
   2   6   2   18.31    1.96
  -3  -6  -2    3.21    1.84
   3  -6   2    4.84    1.50
  -3  -6  -2    4.11    1.89
   3  -6   2    3.94    1.18
   3   6   2    6.63    2.11
  -3   6  -2    4.96    2.31
   3   6   2    4.89    1.71
  -4  -6  -2   42.75    5.35
   4  -6   2   41.10    3.04
  -4  -6  -2   43.28    3.00
   4  -6   2   39.34    3.23
   4   6   2   36.29    3.49
  -4   6  -2   46.19    5.52
   4   6   2   39.48    4.14
  -5  -6  -2   -3.41    5.05
   5  -6   2    0.74    1.82
   5  -6   2   -3.94    2.15
  -5   6  -2   10.71    4.98
   5  -7  -2    7.42    2.44
   5  -7  -2    8.07    2.36
   5   7  -2    2.72    2.79
  -5   7   2   16.80    5.21
   4  -7  -2    0.14    1.50
  -4  -7   2    1.70    1.87
  -4  -7   2    2.86    3.51
   4   7  -2   -1.85    2.13
  -4   7   2    1.26    2.90
   4   7  -2   -0.63    2.01
  -3  -7   2    1.88    1.90
   3  -7  -2    2.34    1.04
   3  -7  -2    2.21    1.28
   3   7  -2    2.80    1.78
   3   7  -2    3.75    1.85
  -3   7   2    1.10    1.87
   2  -7  -2    1.35    1.00
  -2  -7   2   -0.33    1.49
   2  -7  -2    0.75    0.82
   2  -7  -2   -0.03    0.76
  -2  -7   2   -0.15    0.60
  -2   7   2    0.54    1.34
   2   7  -2   -0.12    1.15
   2   7  -2    2.17    1.34
   2   7  -2    1.31    1.44
   1  -7  -2    0.61    0.88
  -1  -7   2   -0.10    1.16
  -1  -7   2    0.65    0.64
   1  -7  -2    0.28    0.65
   1   7  -2    2.62    1.63
  -1   7   2   -0.82    1.03
   1   7  -2    0.35    1.28
  -1   7   2   -0.21    1.02
   1   7  -2   -0.49    0.94
   0  -7  -2    0.00    0.65
   0  -7  -2    0.16    1.10
   0  -7   2    0.59    0.69
   0  -7   2    0.56    1.09
   0   7  -2   -0.78    0.73
   0   7  -2    1.48    1.88
   0   7   2   -0.13    1.07
   0   7   2   -0.18    1.13
   0   7   2   -1.07    2.40
   0   7  -2   -1.53    2.49
  -1  -7  -2   53.45    1.52
   1  -7   2   51.58    1.89
   1  -7   2   54.00    1.84
   1  -7   2   51.49    1.68
  -1  -7  -2   55.87    2.51
   1   7   2   53.41    2.36
   1   7   2   55.28    3.33
  -1   7  -2   49.19    3.18
   1   7   2   53.62    2.32
   2  -7   2    5.82    1.07
   2  -7   2    6.43    1.24
  -2  -7  -2    5.38    0.75
  -2  -7  -2    6.35    1.48
  -2  -7  -2    5.54    1.72
   2   7   2    6.61    1.70
   2   7   2    6.34    1.64
  -2   7  -2    5.20    1.91
  -3  -7  -2   21.33    2.73
  -3  -7  -2   21.84    3.03
   3  -7   2   20.95    1.96
   3  -7   2   20.59    2.07
   3   7   2   23.24    2.72
  -3   7  -2   21.28    3.95
   3   7   2   21.74    2.90
   4  -7   2    3.25    1.88
  -4  -7  -2    3.43    2.93
  -4  -7  -2    6.62    2.14
   4   7   2    3.27    2.58
   4   7   2    1.85    2.18
  -4   7  -2    4.62    3.27
  -5  -7  -2   -3.22    5.25
   5  -7   2   -0.17    2.27
   5  -7   2    3.49    1.99
   5   7   2   -3.82    2.65
  -5   7  -2   10.94    5.03
  -4  -8   2    8.45    2.25
   4  -8  -2    6.34    1.83
  -4   8   2    9.16    3.68
   4   8  -2    8.43    2.44
   4   8  -2    3.63    2.38
   3  -8  -2   10.58    1.39
  -3  -8   2   11.20    2.39
   3  -8  -2   11.88    1.81
  -3   8   2   10.84    2.58
   3   8  -2   12.63    2.36
   3   8  -2   15.70    2.32
   3   8  -2    9.71    2.24
  -2  -8   2   -0.06    0.66
   2  -8  -2    0.39    0.84
   2  -8  -2    0.20    0.90
  -2  -8   2   -0.74    1.68
   2  -8  -2   -0.18    0.84
   2   8  -2    1.80    1.71
   2   8  -2    0.72    1.47
   2   8  -2    0.36    1.29
  -2   8   2   -0.69    1.39
  -1  -8   2   33.55    2.28
   1  -8  -2   33.95    1.74
  -1  -8   2   34.19    1.40
   1  -8  -2   32.72    1.57
  -1   8   2   33.52    1.89
   1   8  -2   39.58    3.63
   1   8  -2   34.17    2.94
   1   8  -2   34.14    1.60
  -1   8   2   32.17    2.29
   0  -8   2    2.78    1.20
   0  -8  -2    1.97    0.73
   0  -8   2    2.79    0.80
   0  -8  -2    3.07    1.28
   0   8   2    2.92    1.29
   0   8  -2    3.88    2.04
   0   8   2    2.12    1.14
   0   8  -2    2.79    0.93
   0   8  -2    1.62    2.74
  -1  -8  -2    0.20    1.40
   1  -8   2    0.44    0.86
   1  -8   2    0.02    0.90
  -1  -8  -2   -0.36    0.60
  -1   8  -2   -1.60    1.71
   1   8   2    1.00    1.13
   1   8   2   -0.27    1.42
   1   8   2    2.95    1.78
   2  -8   2    3.88    1.08
  -2  -8  -2    3.39    0.68
  -2  -8  -2    3.65    1.86
   2  -8   2    2.44    1.11
   2   8   2    3.41    1.15
   2   8   2    5.31    1.85
   2   8   2    4.95    1.85
  -2   8  -2    2.13    1.94
   3  -8   2   29.97    2.17
  -3  -8  -2   25.58    3.30
  -3  -8  -2   27.67    3.01
   3  -8   2   30.80    2.06
   3   8   2   30.20    3.61
   3   8   2   29.25    2.97
  -3   8  -2   30.96    4.44
  -4  -8  -2   -0.59    2.69
  -4  -8  -2    1.92    2.07
   4  -8   2    0.84    1.69
  -4   8  -2    5.01    3.33
   4   8   2    1.66    2.56
   4   8   2    0.26    2.23
  -4  -9   2   12.14    2.50
   4  -9  -2   10.35    2.13
   4   9  -2   14.56    3.25
  -4   9   2   17.39    4.43
  -3  -9   2   43.59    3.42
   3  -9  -2   44.00    2.64
   3  -9  -2   45.76    2.27
   3   9  -2   46.72    3.25
   3   9  -2   45.29    3.75
   3   9  -2   46.99    4.27
  -3   9   2   44.52    4.19
   2  -9  -2    1.01    1.04
  -2  -9   2   -0.69    1.61
  -2  -9   2    0.16    0.75
   2  -9  -2   -0.27    0.90
   2   9  -2    0.62    1.53
   2   9  -2    2.52    1.84
  -2   9   2   -0.17    1.50
   2   9  -2    0.73    1.40
  -1  -9   2   44.43    2.59
   1  -9  -2   40.29    1.98
  -1  -9   2   44.18    1.58
   1   9  -2   44.79    3.31
  -1   9   2   41.82    2.63
   1   9  -2   48.82    4.12
   1   9  -2   43.46    1.86
   0  -9   2   61.37    2.44
   0  -9  -2   65.65    2.64
   0  -9  -2   66.61    2.02
   0  -9   2   63.72    2.03
   0   9  -2   70.96    4.16
   0   9   2   58.84    3.19
   0   9   2   61.99    2.39
   0   9  -2   62.95    2.15
   1  -9   2  250.13    4.75
   1  -9   2  254.57    5.05
  -1  -9  -2  252.41    5.90
  -1  -9  -2  252.06    4.46
   1   9   2  247.90    5.48
  -1   9  -2  256.28    5.46
   1   9   2  243.88    6.85
   1   9   2  240.07    7.46
  -1   9  -2  259.97    7.80
   2  -9   2   37.67    1.94
   2  -9   2   37.64    1.28
   2  -9   2   36.91    2.00
  -2  -9  -2   36.77    1.41
  -2  -9  -2   37.29    2.72
   2   9   2   40.88    3.83
   2   9   2   37.74    2.92
   2   9   2   36.65    2.55
  -2   9  -2   33.84    3.54
   3  -9   2   90.92    3.09
   3  -9   2  102.70    3.83
  -3  -9  -2   93.68    4.26
   3   9   2   96.60    5.33
   3   9   2   94.84    4.58
   3   9   2   92.38    4.23
  -3   9  -2  102.94    6.31
  -4  -9  -2    3.50    2.19
   4  -9   2   -1.83    1.62
   4   9   2   -1.19    2.55
   4   9   2   -1.86    2.34
  -4   9  -2    5.54    3.46
  -4 -10   2    6.80    2.49
   4 -10  -2    1.88    1.67
   4  10  -2   -0.24    2.46
   4  10  -2    4.51    2.57
  -4  10   2   10.10    4.15
   3 -10  -2   12.02    1.90
   3 -10  -2   10.81    1.55
  -3 -10   2   12.74    2.68
  -3  10   2   15.09    3.01
   3  10  -2   15.64    2.39
   3  10  -2    8.57    2.52
   3  10  -2   10.82    2.52
   2 -10  -2   16.45    1.72
  -2 -10   2   18.26    2.75
  -2 -10   2   16.02    1.31
   2 -10  -2   17.31    1.75
  -2  10   2   15.45    3.00
   2  10  -2   25.25    3.83
   2  10  -2   20.21    2.24
   2  10  -2   16.61    2.80
   1 -10  -2    6.02    1.37
  -1 -10   2    3.66    1.56
  -1 -10   2    4.20    0.94
   1 -10  -2    4.77    1.08
  -1  10   2    4.86    1.38
   1  10  -2    5.20    2.09
   1  10  -2    6.39    1.24
  -1  10   2    4.53    1.50
   1  10  -2    6.28    2.43
   0 -10   2    1.70    0.91
   0 -10   2    2.29    1.42
   0 -10  -2    1.73    0.89
   0 -10  -2    1.61    1.43
   0  10  -2    2.17    2.12
   0  10   2    2.01    1.57
   0  10  -2    1.12    1.02
   0  10   2    1.66    1.19
   1 -10   2   22.33    1.65
  -1 -10  -2   22.54    1.41
  -1 -10  -2   21.13    2.55
   1 -10   2   24.61    1.75
  -1  10  -2   22.84    1.77
   1  10   2   27.65    4.10
  -1  10  -2   23.39    3.26
   1  10   2   22.45    2.59
   1  10   2   21.72    2.02
  -2 -10  -2   24.68    1.37
  -2 -10  -2   27.42    3.01
   2 -10   2   27.20    1.91
   2 -10   2   27.81    1.85
   2  10   2   26.70    2.66
  -2  10  -2   26.44    3.58
   2  10   2   25.09    2.42
   2  10   2   33.34    4.04
  -3 -10  -2   -0.21    2.17
   3 -10   2   -1.20    1.29
   3 -10   2    0.84    1.44
   3  10   2    1.14    1.51
   3  10   2    1.23    2.37
   3  10   2    2.28    2.39
  -3  10  -2    0.96    2.80
  -4 -10  -2   27.95    3.45
   4 -10   2   20.12    2.70
   4  10   2   18.07    3.33
   4  10   2   15.23    3.39
   4 -11  -2    0.06    1.65
  -4 -11   2    3.74    2.61
  -4  11   2    7.02    4.05
   4  11  -2    3.46    2.80
   4  11  -2   -2.09    2.71
   3 -11  -2   25.44    2.31
  -3 -11   2   27.84    3.49
   3 -11  -2   24.92    2.04
   3  11  -2   25.32    4.48
   3  11  -2   20.77    3.54
   3  11  -2   29.20    2.88
  -3  11   2   29.96    4.33
   2 -11  -2   10.97    1.84
  -2 -11   2   10.35    1.39
  -2 -11   2   13.89    2.59
   2 -11  -2   11.44    1.47
  -2  11   2   11.46    1.85
   2  11  -2   12.30    2.59
  -2  11   2   11.67    2.44
   2  11  -2   11.35    2.47
   2  11  -2   13.59    2.16
   1 -11  -2   25.91    1.77
  -1 -11   2   25.51    1.55
   1 -11  -2   27.48    2.17
  -1 -11   2   22.04    2.33
   1  11  -2   28.50    3.78
  -1  11   2   24.82    2.07
   1  11  -2   23.35    1.79
  -1  11   2   25.05    2.64
   1  11  -2   32.31    5.10
   0 -11   2    7.33    1.64
   0 -11  -2    9.34    1.23
   0 -11  -2    8.87    1.79
   0 -11   2    7.97    1.16
   0  11  -2   10.27    2.76
   0  11   2    8.03    1.87
   0  11   2    6.82    1.54
   0  11  -2    8.28    1.39
   1 -11   2   -0.64    1.21
  -1 -11  -2    0.38    1.90
  -1 -11  -2   -0.72    0.80
   1 -11   2    0.63    1.02
   1  11   2    0.94    1.87
   1  11   2    3.07    2.82
  -1  11  -2   -0.10    1.26
   1  11   2    0.55    1.52
  -1  11  -2   -0.32    2.25
   2 -11   2    2.76    1.29
  -2 -11  -2    0.82    1.99
  -2 -11  -2    2.10    0.89
   2 -11   2    2.11    1.26
   2  11   2    2.34    2.00
  -2  11  -2    0.99    2.26
   2  11   2    5.27    2.60
   2  11   2    1.32    1.53
   3 -11   2    0.78    1.51
  -3 -11  -2    0.10    2.28
   3 -11   2   -1.42    1.29
   3  11   2    0.44    1.67
   3  11   2   -0.65    2.45
   3  11   2    1.89    2.39
  -3  11  -2    0.34    2.97
   4 -11   2   -0.62    1.71
  -4 -11  -2    3.27    2.51
   4  11   2   -5.84    2.73
   4  11   2   -4.50    2.69
  -4  11  -2    4.61    3.70
  -4 -12   2   12.42    3.02
   4 -12  -2    7.65    2.08
   4  12  -2    0.68    3.16
   4  12  -2    7.01    3.10
  -4  12   2   17.33    4.93
  -3 -12   2   21.09    3.56
   3 -12  -2   16.43    1.99
   3 -12  -2   19.99    2.20
   3  12  -2   15.89    3.30
  -3  12   2   23.44    4.62
   3  12  -2   16.37    3.53
  -2 -12   2   -1.12    2.03
  -2 -12   2    0.72    1.04
   2 -12  -2    1.50    1.23
   2 -12  -2    0.77    1.47
  -2  12   2    0.37    2.12
   2  12  -2    5.39    2.86
   2  12  -2    1.83    2.24
  -2  12   2   -0.38    1.48
   2  12  -2    1.32    1.59
   1 -12  -2  209.01    5.12
  -1 -12   2  206.41    5.69
  -1 -12   2  209.65    4.30
   1 -12  -2  215.66    4.61
  -1  12   2  204.45    5.26
   1  12  -2  200.56    4.66
  -1  12   2  208.35    6.72
   1  12  -2  194.73    7.54
   1  12  -2  198.72    8.66
   0 -12  -2    4.33    1.88
   0 -12   2    5.08    1.76
   0 -12   2    5.21    1.16
   0 -12  -2    3.76    1.12
   0  12   2    4.65    2.06
   0  12  -2    9.83    3.54
   0  12  -2    5.08    1.36
   0  12   2    4.68    1.56
   1 -12   2   36.03    2.32
  -1 -12  -2   39.41    3.25
   1 -12   2   41.41    2.25
  -1 -12  -2   40.72    1.94
   1  12   2   41.64    2.72
  -1  12  -2   34.13    4.70
   1  12   2   38.87    5.35
   1  12   2   40.85    3.67
  -1  12  -2   39.13    2.35
   2 -12   2    4.09    1.42
  -2 -12  -2    5.35    2.53
   2 -12   2    5.83    1.52
  -2 -12  -2    3.45    1.06
   2  12   2    5.57    2.31
   2  12   2    3.68    1.95
  -2  12  -2    4.58    2.72
   2  12   2    8.09    2.90
   3 -12   2   14.11    2.18
   3 -12   2   13.74    1.90
  -3 -12  -2   20.83    3.21
   3  12   2   12.64    2.45
   3  12   2   20.22    2.88
   3  12   2   10.74    2.96
   4 -12   2    4.57    2.09
  -4 -12  -2   11.96    3.09
  -4  12  -2   14.58    4.74
  -4 -13   2    7.22    2.94
   4 -13  -2    4.11    1.98
   4  13  -2   -1.22    2.66
  -4  13   2   10.66    4.62
   3 -13  -2   16.07    2.12
   3 -13  -2   18.54    2.24
  -3 -13   2   22.09    3.21
   3  13  -2   16.77    3.23
   3  13  -2   17.20    3.49
   2 -13  -2    0.47    1.25
  -2 -13   2   -0.35    1.08
  -2 -13   2   -0.73    2.36
   2 -13  -2   -0.22    1.52
   2  13  -2    0.69    1.63
  -2  13   2    0.04    1.69
   2  13  -2    3.95    3.00
  -2  13   2    1.40    2.33
   2  13  -2   -1.71    2.45
  -1 -13   2    5.14    1.27
  -1 -13   2    5.24    2.19
   1 -13  -2    5.87    1.82
   1 -13  -2    5.46    1.37
  -1  13   2    4.79    1.78
  -1  13   2    4.72    1.92
   1  13  -2    5.14    1.51
   1  13  -2    6.05    3.94
   1  13  -2    7.45    2.97
   0 -13  -2   21.56    1.66
   0 -13   2   18.18    2.72
   0 -13   2   19.68    1.83
   0 -13  -2   21.68    2.80
   0  13   2   21.54    2.25
   0  13  -2   20.56    1.98
   0  13   2   24.92    3.13
   1 -13   2   97.20    3.18
   1 -13   2   95.06    3.31
  -1 -13  -2   94.16    4.24
  -1 -13  -2   95.38    2.88
  -1  13  -2   93.77    3.50
   1  13   2   83.83    4.57
   1  13   2   89.92    3.47
  -1  13  -2   96.94    6.04
   1  13   2   96.34    7.76
  -2 -13  -2   11.19    2.88
  -2 -13  -2   11.39    1.48
   2 -13   2   11.58    1.80
   2 -13   2   12.34    1.81
   2  13   2   12.16    2.48
  -2  13  -2   13.95    3.33
   2  13   2   10.90    2.48
   2  13   2   11.81    3.32
   3 -13   2   47.68    2.94
  -3 -13  -2   51.33    4.49
   3 -13   2   52.72    3.16
   3  13   2   55.24    3.77
  -3  13  -2   66.13    6.37
   3  13   2   45.16    5.38
  -4 -13  -2    3.77    2.82
  -4  13  -2    8.74    4.38
  -4 -14   2    6.99    3.26
  -4  14   2    9.90    4.74
  -3 -14   2   17.23    3.27
   3 -14  -2   12.04    1.92
   3 -14  -2   15.04    2.23
   3  14  -2   10.58    3.27
   3  14  -2   10.59    3.44
  -2 -14   2   13.46    1.80
   2 -14  -2   18.14    2.16
  -2 -14   2   22.76    3.13
   2  14  -2   17.36    3.68
   2  14  -2   19.68    2.18
  -2  14   2   18.05    2.50
   2  14  -2   16.95    3.36
   1 -14  -2    0.80    1.87
  -1 -14   2    0.13    1.25
   1 -14  -2    0.73    1.27
  -1 -14   2    0.96    2.18
  -1  14   2    1.24    1.86
   1  14  -2   -0.26    1.47
  -1  14   2   -0.11    1.66
   1  14  -2    2.51    3.19
   1  14  -2    2.99    4.30
   0 -14   2   67.96    2.75
   0 -14  -2   67.82    2.67
   0 -14  -2   66.36    3.64
   0 -14   2   62.59    3.41
   0  14   2   68.18    3.33
   0  14   2   61.88    4.99
   0  14  -2   65.72    2.88
   1 -14   2    1.89    1.42
  -1 -14  -2    0.97    1.13
   1 -14   2    0.17    1.72
  -1 -14  -2    0.78    2.31
   1  14   2    1.41    2.29
  -1  14  -2    1.11    1.60
  -1  14  -2    1.01    3.00
   1  14   2    5.33    4.39
   1  14   2    0.62    1.92
  -2 -14  -2   -0.66    1.00
  -2 -14  -2    1.13    2.59
   2 -14   2    0.26    1.41
   2 -14   2    0.47    1.27
   2  14   2    0.18    2.76
   2  14   2    0.92    2.08
  -2  14  -2    2.09    2.87
   3 -14   2    1.83    1.51
  -3 -14  -2    4.62    3.00
  -3  14  -2   13.90    4.73
   3  14   2    0.32    2.98
   3  14   2    4.54    2.50
  -4 -14  -2   18.55    3.64
   4 -14   2   12.94    2.53
   3 -15  -2   19.30    2.24
   3 -15  -2   22.48    2.49
  -3 -15   2   24.82    4.26
   3  15  -2   14.47    3.76
   3  15  -2   15.09    3.78
   2 -15  -2   24.47    2.49
  -2 -15   2   28.64    3.76
  -2 -15   2   21.21    1.94
   2  15  -2   23.18    3.80
   2  15  -2   26.04    2.33
   2  15  -2   21.01    3.86
  -2  15   2   24.19    2.73
  -1 -15   2    9.42    1.58
  -1 -15   2    8.41    2.58
   1 -15  -2    9.43    2.25
   1 -15  -2    9.73    1.62
   1  15  -2    9.94    5.03
   1  15  -2   10.80    3.35
   1  15  -2   11.17    1.85
  -1  15   2   11.38    2.40
  -1  15   2    8.70    2.10
   0 -15  -2    4.18    2.36
   0 -15   2    4.89    2.28
   0 -15   2    4.50    1.47
   0 -15  -2    4.20    1.38
   0  15  -2   13.77    5.94
   0  15  -2    5.16    1.74
   0  15   2    4.60    1.95
   0  15   2    8.18    3.10
  -1 -15  -2    1.85    1.22
  -1 -15  -2    3.82    2.65
   1 -15   2    1.98    1.51
   1 -15   2    0.97    1.79
  -1  15  -2    0.24    3.39
   1  15   2    2.00    1.98
  -1  15  -2    1.71    1.61
   1  15   2    5.83    4.69
   2 -15   2   -0.34    1.28
  -2 -15  -2    1.30    2.38
   2 -15   2    0.16    1.50
  -2 -15  -2   -1.17    1.08
   2  15   2    4.22    3.40
  -2  15  -2    3.24    3.10
   2  15   2    1.13    2.05
   3 -15   2    2.55    1.71
  -3 -15  -2    4.81    3.19
   3 -15   2   -2.63    1.69
   3  15   2   -1.69    3.25
   3  15   2    6.08    2.51
   3 -16  -2   19.13    2.34
  -3 -16   2   29.86    4.57
   3 -16  -2   20.89    2.48
   3  16  -2   10.22    3.89
   2 -16  -2    1.46    1.51
  -2 -16   2    0.80    1.37
  -2 -16   2    4.19    2.64
  -2  16   2    7.14    2.72
  -2  16   2    3.01    2.05
   2  16  -2    4.68    3.65
   1 -16  -2   72.13    2.99
  -1 -16   2   78.49    4.33
  -1 -16   2   73.34    3.03
   1 -16  -2   75.21    3.77
  -1  16   2   84.14    4.45
   1  16  -2   60.39    5.67
   1  16  -2   77.44    8.93
  -1  16   2   74.68    3.66
   1  16  -2   74.43    3.15
   1 -16   2   15.93    2.03
  -1 -16  -2   18.72    2.91
   1 -16   2   16.18    2.26
  -1 -16  -2   15.29    1.95
  -1  16  -2   17.99    2.34
   1  16   2   16.47    2.58
   1  16   2   14.10    4.90
  -1  16  -2   24.50    4.30
  -2 -16  -2    2.11    1.29
   2 -16   2    3.09    1.53
  -2 -16  -2    4.48    2.92
   2 -16   2    2.22    1.73
  -2  16  -2    7.90    3.38
   2  16   2    3.98    2.09
   2  16   2    5.01    3.82
   3 -16   2    9.10    2.11
  -3 -16  -2   10.22    3.49
   3 -16   2    3.01    1.94
   3  16   2   10.20    2.73
   3 -17  -2    3.37    1.78
  -3 -17   2    5.77    3.23
   3 -17  -2   -0.84    1.73
   3  17  -2   -4.86    3.65
   2 -17  -2   -0.01    1.62
  -2 -17   2    2.48    2.76
  -2  17   2    1.79    2.06
  -2  17   2    6.20    2.72
   2  17  -2    4.10    3.99
  -1 -17   2    6.66    1.64
  -1 -17   2   10.07    2.72
   1 -17  -2    8.79    1.78
   1 -17  -2    8.66    2.39
  -1  17   2    9.19    2.32
   1  17  -2   10.82    1.93
   1  17  -2   12.63    4.98
   1  17  -2    2.77    3.19
   0 -17   2   14.83    2.00
   0 -17  -2   16.83    2.01
   0 -17   2   16.23    2.71
   0 -17  -2   16.64    2.84
   0  17  -2   16.46    2.20
   0  17   2   17.09    2.54
   0  17  -2   10.98    6.86
   1 -17   2   13.46    2.03
   1 -17   2   17.58    2.48
  -1 -17  -2   14.69    1.89
  -1 -17  -2   18.28    3.19
   1  17   2   19.12    5.27
   1  17   2   18.71    2.57
  -1  17  -2   18.21    2.50
  -1  17  -2   26.11    5.51
   2 -17   2   16.28    2.23
  -2 -17  -2   16.90    1.91
  -2 -17  -2   19.13    3.70
   2 -17   2   14.21    2.23
   2  17   2   15.89    4.56
   2  17   2   20.40    2.97
  -3 -17  -2    5.61    3.41
   3 -17   2    3.19    1.91
   3 -17   2   -1.86    1.88
   3 -18  -2    1.24    1.70
  -3 -18   2    5.87    3.51
  -2 -18   2   25.97    3.87
   2 -18  -2   20.61    2.49
  -2  18   2   21.07    3.06
   2  18  -2   19.14    4.56
   1 -18  -2    1.10    2.25
   1 -18  -2   -0.43    1.58
  -1 -18   2    2.93    2.61
  -1 -18   2   -2.51    1.42
   1  18  -2    5.17    4.87
   1  18  -2    1.90    1.60
  -1  18   2    1.36    1.96
   0 -18  -2   36.53    2.71
   0 -18   2   35.09    3.63
   0 -18  -2   34.23    4.03
   0 -18   2   30.92    2.69
   0  18  -2   40.35    7.45
   0  18  -2   32.14    2.62
   0  18   2   39.03    3.27
   1 -18   2    3.44    2.04
  -1 -18  -2   -0.02    1.39
   1 -18   2   -1.84    1.55
  -1 -18  -2    1.32    2.79
  -1  18  -2    1.38    1.82
   1  18   2    9.24    4.92
   1  18   2    2.19    2.07
  -1  18  -2    8.15    3.55
  -2 -18  -2    0.93    3.20
   2 -18   2    0.46    1.56
   2  18   2    0.60    4.25
   2  18   2    4.69    2.22
   3 -18   2    0.26    1.68
  -3 -18  -2    5.32    3.70
   2 -19  -2   -3.09    1.72
  -2 -19   2    5.88    3.25
   2  19  -2    2.26    4.70
   1 -19  -2   -1.37    1.58
   1 -19  -2    0.79    2.31
  -1 -19   2   -3.19    1.49
  -1 -19   2    1.19    2.73
  -1  19   2    1.13    2.21
   1  19  -2    0.51    1.66
   0 -19  -2   14.39    2.20
   0 -19   2   10.92    2.13
   0 -19   2   17.80    3.00
   0 -19  -2   17.99    3.17
   0  19  -2    3.06    7.16
   0  19  -2   17.55    2.61
   0  19   2   17.71    2.72
  -1 -19  -2    3.81    2.93
   1 -19   2    1.03    1.86
  -1 -19  -2    0.45    1.57
  -1  19  -2    4.43    2.06
  -1  19  -2   11.16    3.79
   1  19   2    6.82    2.20
   2 -19   2    9.57    2.15
  -2 -19  -2   14.68    3.82
   2  19   2   14.30    2.65
   2  19   2    3.02    4.77
   2 -20  -2    3.92    2.15
  -2 -20   2    7.71    3.46
   2  20  -2    5.42    5.05
  -1 -20   2    8.30    3.02
  -1 -20   2    1.59    1.80
   1 -20  -2    7.02    2.66
  -1  20   2    7.71    2.49
   0 -20  -2    4.54    1.92
   0 -20   2    1.27    1.94
   0 -20  -2    7.02    2.89
   0 -20   2    9.17    2.69
   0  20   2    6.96    2.25
   0  20  -2    6.37    2.03
  -1 -20  -2    2.85    3.06
  -1  20  -2    4.06    2.16
   1  20   2    7.72    2.45
  -2 -20  -2    1.87    3.40
   2  20   2   -0.55    5.03
   1 -21  -2   -2.08    1.88
  -1 -21   2    3.02    2.91
  -1  21   2    2.11    2.22
   0 -21  -2   11.87    3.29
   0 -21   2    6.40    2.21
   0 -21   2   14.91    2.94
   0 -21  -2    8.36    2.21
   0  21   2   14.85    2.71
   0  21  -2   14.17    2.49
   1 -21   2    0.89    2.05
  -1 -21  -2    9.90    3.55
  -1 -21  -2   -1.48    1.86
   1  21   2    6.88    2.38
   1 -22  -2   -3.93    2.01
  -1 -22   2    5.00    3.22
  -1  22   2    0.58    2.31
   0 -22   2    5.50    2.85
   0 -22  -2    1.97    2.98
   0 -22  -2   -2.18    1.91
   0  22   2    3.19    2.29
   0  22  -2    3.71    2.04
  -1 -22  -2   -3.67    1.92
   1 -22   2   -4.72    2.04
  -1 -22  -2    2.88    3.52
   1  22   2    5.23    2.37
   5   0  -3   -1.14    1.85
  -5   0   3    2.21    3.89
   4   0  -3   -1.39    1.42
   4   0  -3    0.38    1.41
  -4   0   3   -0.14    2.24
  -3   0   3   -0.77    1.51
   3   0  -3    0.16    0.95
   3   0  -3    0.25    0.98
  -3   0   3    0.35    1.07
   2   0  -3   -0.11    0.33
  -2   0   3   -0.71    0.80
   2   0  -3    0.43    0.67
  -2   0   3   -0.41    1.12
   2   0  -3   -0.17    0.75
  -1   0   3   10.40    0.74
  -1   0   3   12.46    1.45
  -1   0   3   10.41    1.03
   1   0  -3   11.84    0.67
   1   0  -3   11.23    1.05
   0   0   3   -0.09    0.46
   0   0   3    0.88    0.54
   0   0   3   -0.09    0.49
   0   0  -3    0.97    0.78
  -1   0  -3  154.00    3.00
   1   0   3  156.10    3.79
  -1   0  -3  151.61    4.48
   1   0   3  155.71    3.21
   1   0   3  154.00    2.62
  -2   0  -3   -0.89    0.79
   2   0   3   -0.40    0.69
   2   0   3    0.32    1.03
  -2   0  -3   -0.68    1.12
   2   0   3    0.18    0.64
  -3   0  -3   28.71    1.62
   3   0   3   29.78    1.28
   3   0   3   29.51    2.25
  -3   0  -3   27.20    3.08
   3   0   3   27.74    2.36
   4   0   3   -1.44    1.78
   4   0   3    0.48    1.43
  -4   0  -3    1.20    2.46
  -5   0  -3    2.13    4.06
  -5  -1   3   12.96    4.98
   5  -1  -3    7.70    2.42
   5  -1  -3    2.95    2.26
  -5   1   3   11.44    4.40
   5   1  -3    2.47    2.44
   5   1  -3    4.49    2.32
   4  -1  -3   46.15    3.59
  -4  -1   3   44.64    4.88
   4  -1  -3   44.65    2.59
   4   1  -3   45.02    2.74
  -4   1   3   47.10    4.81
   4   1  -3   47.06    3.71
  -3  -1   3   -0.60    1.41
   3  -1  -3   -0.70    0.50
  -3  -1   3    0.48    1.17
   3  -1  -3    0.11    0.96
   3  -1  -3   -0.29    0.84
  -3   1   3   -0.14    1.53
   3   1  -3   -0.07    0.89
   3   1  -3    0.96    1.05
  -3   1   3    0.30    1.00
   2  -1  -3  173.03    4.94
  -2  -1   3  170.45    5.69
   2  -1  -3  174.48    2.78
  -2  -1   3  163.84    3.83
   2  -1  -3  173.41    3.72
   2   1  -3  173.99    3.62
  -2   1   3  169.83    5.67
  -2   1   3  167.17    3.67
   2   1  -3  169.67    4.92
  -1  -1   3  117.97    3.76
  -1  -1   3  118.68    2.71
  -1  -1   3  118.44    1.98
  -1   1   3  113.66    2.44
   1   1  -3  121.69    2.22
  -1   1   3  117.40    2.59
   1   1  -3  118.24    3.16
  -1   1   3  117.95    2.11
  -1   1   3  117.29    3.66
   0  -1   3   77.65    1.49
   0  -1   3   79.16    1.48
   0  -1   3   78.29    1.71
   0  -1  -3   78.83    2.17
   0   1   3   76.59    1.75
   0   1  -3   73.46    2.74
   0   1   3   78.94    1.81
   0   1  -3   63.98    2.05
   0   1   3   80.89    1.52
  -1  -1  -3  683.53   15.79
  -1  -1  -3  677.88   12.32
   1  -1   3  705.13   10.20
   1   1   3  698.80   11.52
  -1   1  -3  694.36   16.03
   1   1   3  699.15   10.10
  -1   1  -3  701.84   11.87
   1   1   3  691.15   14.07
   2  -1   3   54.94    2.15
  -2  -1  -3   49.91    2.82
   2  -1   3   53.29    1.51
  -2  -1  -3   50.85    1.84
   2  -1   3   53.44    2.42
  -2   1  -3   52.63    1.53
   2   1   3   52.88    2.45
  -2   1  -3   51.31    3.01
   2   1   3   53.01    1.36
   2   1   3   52.32    2.14
  -3  -1  -3    4.02    1.29
   3  -1   3    5.46    1.58
   3  -1   3    3.57    0.89
   3  -1   3    1.73    1.05
  -3  -1  -3    1.60    1.70
   3   1   3    2.55    1.53
   3   1   3    2.39    1.15
  -3   1  -3    2.79    1.85
  -3   1  -3    4.41    0.93
   4  -1   3   39.77    3.42
   4  -1   3   36.54    3.04
  -4  -1  -3   47.54    5.32
  -4   1  -3   44.01    5.05
   4   1   3   41.55    3.65
   4   1   3   37.61    3.06
   5  -1   3   -0.84    2.58
  -5  -1  -3    8.92    3.94
   5  -1   3    3.54    2.23
  -5   1  -3   10.27    4.68
   5   1   3   -3.51    2.62
   5   1   3    2.59    2.38
  -5  -2   3    2.28    4.71
   5  -2  -3   -1.93    1.87
   5  -2  -3    0.83    1.89
   5   2  -3   -1.13    2.10
  -5   2   3    2.31    3.69
   4  -2  -3   -0.42    1.37
  -4  -2   3    0.63    2.54
   4  -2  -3    0.19    1.34
  -4  -2   3    1.79    1.42
   4   2  -3   -0.45    1.54
   4   2  -3   -0.83    1.48
  -4   2   3    0.29    2.26
   3  -2  -3   59.90    2.40
   3  -2  -3   58.45    3.18
  -3  -2   3   60.84    2.60
   3  -2  -3   60.92    1.56
  -3  -2   3   61.25    3.99
   3   2  -3   61.32    3.27
  -3   2   3   60.47    2.16
  -3   2   3   57.83    3.85
   3   2  -3   60.37    2.38
  -2  -2   3   12.70    1.98
  -2  -2   3   11.25    1.48
   2  -2  -3   12.81    1.06
   2  -2  -3   12.10    0.78
   2   2  -3   12.85    1.04
  -2   2   3   10.44    1.85
  -2   2   3   11.30    1.11
   2   2  -3   11.90    1.63
  -1  -2   3  609.00   10.78
  -1  -2   3  614.08    8.98
  -1   2   3  618.42   14.41
  -1   2   3  626.71   10.63
   1   2  -3  632.47   12.86
   1   2  -3  633.98   10.28
  -1   2   3  620.26    8.87
  -1   2   3  618.62   10.30
   0  -2  -3    0.85    0.36
   0  -2  -3   -0.40    0.63
   0  -2   3    0.26    0.31
   0  -2   3    0.47    0.47
   0  -2   3   -0.13    0.54
   0   2  -3    0.39    1.11
   0   2  -3    2.07    1.34
   0   2   3   -0.78    0.81
   0   2   3   -1.02    1.08
   0   2   3   -0.51    0.52
   1  -2   3  189.38    3.20
   1  -2   3  186.91    3.76
  -1  -2  -3  179.66    3.78
  -1  -2  -3  189.19    4.96
  -1   2  -3  195.20    3.28
   1   2   3  191.66    3.10
   1   2   3  189.59    4.57
  -1   2  -3  182.50    5.45
   2  -2   3    0.41    0.72
  -2  -2  -3   -0.49    1.01
   2  -2   3    0.46    0.89
  -2  -2  -3    0.08    0.98
   2   2   3    0.15    0.55
  -2   2  -3    0.30    0.48
  -2   2  -3   -0.48    1.31
   2   2   3    0.82    1.13
   2   2   3    0.46    0.77
   3  -2   3   39.96    2.36
  -3  -2  -3   39.34    2.18
   3  -2   3   38.40    2.65
  -3  -2  -3   37.79    3.26
   3  -2   3   39.90    1.62
   3   2   3   38.71    2.78
  -3   2  -3   36.50    3.51
   3   2   3   39.37    2.48
  -4  -2  -3    9.00    2.94
   4  -2   3    6.33    2.14
   4  -2   3    6.04    1.80
  -4   2  -3    9.10    3.36
   4   2   3    5.65    2.28
   4   2   3    5.58    1.96
   5  -2   3   11.13    2.93
   5  -2   3   14.28    2.85
   5   2   3    5.83    3.17
   5   2   3    9.35    2.78
  -5  -3   3    3.76    5.27
   5  -3  -3    2.35    1.98
   5  -3  -3    0.73    2.03
  -5   3   3    4.87    4.03
   5   3  -3    0.59    2.31
  -4  -3   3    9.74    3.18
   4  -3  -3    6.90    1.81
   4  -3  -3    7.62    1.80
  -4  -3   3    7.60    1.77
  -4   3   3    8.56    2.84
   4   3  -3    6.88    2.09
   4   3  -3    6.70    1.90
   3  -3  -3   26.94    2.34
   3  -3  -3   26.66    1.85
   3  -3  -3   26.31    1.25
  -3  -3   3   25.77    3.13
  -3  -3   3   24.73    2.08
  -3   3   3   25.27    1.62
   3   3  -3   27.70    2.64
   3   3  -3   26.43    1.90
  -3   3   3   23.90    2.94
  -2  -3   3    5.22    1.51
  -2  -3   3    4.93    1.22
   2  -3  -3    4.82    0.65
   2  -3  -3    5.66    0.97
   2   3  -3    6.51    0.96
  -2   3   3    4.61    1.37
  -2   3   3    5.51    0.89
   2   3  -3    4.77    1.18
  -1  -3   3    2.46    0.95
  -1  -3   3    4.58    0.57
   1   3  -3    3.20    1.05
  -1   3   3    4.17    0.74
   1   3  -3    3.63    0.90
  -1   3   3    2.75    0.98
  -1   3   3    3.33    0.90
  -1   3   3    4.79    0.95
   0  -3  -3   22.46    1.27
   0  -3   3   19.29    1.07
   0  -3   3   21.46    0.71
   0  -3   3   22.58    1.03
   0   3   3   18.94    2.69
   0   3   3   19.59    0.96
   0   3  -3   15.69    2.88
   0   3   3   18.54    1.41
   1  -3   3  108.93    2.57
   1  -3   3  111.50    2.01
  -1  -3  -3  108.11    2.74
   1  -3   3  113.40    2.30
  -1  -3  -3  109.04    3.23
   1   3   3  108.97    2.10
   1   3   3  104.62    2.79
  -1   3  -3  104.26    3.94
   1   3   3  111.87    3.27
  -2  -3  -3   -0.02    1.09
  -2  -3  -3    0.12    1.03
   2  -3   3    0.74    0.74
   2  -3   3    0.43    0.87
   2   3   3    0.43    0.52
   2   3   3    1.25    1.26
   2   3   3    0.74    0.89
  -2   3  -3   -0.89    1.31
   3  -3   3    5.78    1.08
  -3  -3  -3    6.14    1.64
  -3  -3  -3    5.36    1.86
   3  -3   3    5.98    1.47
   3  -3   3    4.55    1.20
   3   3   3    7.17    1.84
  -3   3  -3    4.04    2.01
   3   3   3    5.47    1.55
   4  -3   3    9.96    1.97
   4  -3   3   14.42    2.35
  -4  -3  -3   13.36    3.06
   4   3   3   10.27    2.36
   4   3   3   10.24    2.55
  -4   3  -3   16.45    3.77
  -5  -3  -3    3.13    3.71
   5  -3   3   -3.21    2.38
   5  -3   3   -0.19    1.86
  -5   3  -3    5.77    4.38
   5   3   3   -2.87    2.21
   5  -4  -3   -2.44    1.80
  -5  -4   3   -2.82    5.05
   5  -4  -3    0.85    1.83
   5   4  -3   -3.32    1.95
  -5   4   3    5.49    3.86
  -4  -4   3    9.84    1.97
   4  -4  -3    8.34    1.86
   4  -4  -3    9.70    1.83
  -4  -4   3   12.04    3.63
   4   4  -3    6.25    2.07
  -4   4   3   10.67    3.14
   4   4  -3    4.77    1.92
   3  -4  -3    0.63    0.76
  -3  -4   3    0.86    1.46
   3  -4  -3    1.42    1.08
  -3  -4   3    1.42    1.74
  -3   4   3   -0.29    1.49
  -3   4   3    1.02    0.99
   3   4  -3    1.22    1.23
   3   4  -3    1.06    1.26
   2  -4  -3   11.78    1.17
   2  -4  -3   11.99    0.94
  -2  -4   3   12.19    2.10
  -2  -4   3   11.31    1.61
  -2   4   3   11.48    1.20
  -2   4   3   11.62    1.92
   2   4  -3   13.54    1.88
   2   4  -3   14.49    1.23
  -1  -4   3    1.31    0.58
  -1  -4   3   -0.49    1.10
  -1   4   3   -0.33    0.84
  -1   4   3   -0.32    0.89
   1   4  -3    1.36    0.81
   1   4  -3    2.19    1.10
   1   4  -3    0.72    1.05
   0  -4  -3  283.50    5.42
   0  -4   3  285.55    4.48
   0  -4   3  277.52    5.25
   0   4   3  286.33    4.54
   0   4   3  299.10    7.56
   0   4   3  273.88    5.23
   0   4  -3  282.54    7.94
   0   4   3  280.08    6.31
  -1  -4  -3   32.99    1.66
   1  -4   3   32.96    0.95
   1  -4   3   33.69    1.43
   1  -4   3   32.63    1.39
  -1  -4  -3   32.67    1.77
   1   4   3   33.96    1.94
   1   4   3   31.79    1.18
   1   4   3   35.71    2.08
  -1   4  -3   29.26    2.61
  -2  -4  -3   46.89    2.27
   2  -4   3   46.48    2.04
  -2  -4  -3   48.62    2.70
   2  -4   3   46.91    1.64
   2   4   3   47.24    1.24
   2   4   3   47.61    2.26
   2   4   3   48.70    2.63
  -2   4  -3   45.37    3.16
   3  -4   3   45.74    1.90
  -3  -4  -3   43.32    3.36
  -3  -4  -3   43.75    2.62
   3  -4   3   45.40    2.51
  -3   4  -3   45.05    3.97
   3   4   3   46.61    2.81
   3   4   3   46.48    3.22
  -4  -4  -3    2.39    2.39
   4  -4   3    2.04    1.42
   4  -4   3    3.58    1.95
   4   4   3    0.28    1.83
  -4   4  -3    4.05    3.04
   4   4   3    0.91    2.21
  -5  -4  -3    0.65    3.98
   5  -4   3   -0.58    1.78
   5  -4   3   -4.59    2.30
  -5   4  -3    6.75    4.51
   5  -5  -3   11.56    2.44
   5  -5  -3   12.64    2.68
  -5  -5   3   20.69    6.58
  -5   5   3   21.32    5.18
   5   5  -3    7.81    2.86
   4  -5  -3   66.87    3.27
   4  -5  -3   64.42    4.12
  -4  -5   3   65.04    6.23
  -4  -5   3   61.20    3.32
  -4   5   3   70.81    6.02
   4   5  -3   59.07    3.29
   4   5  -3   63.48    4.49
   3  -5  -3   31.22    1.53
   3  -5  -3   33.41    2.04
  -3  -5   3   31.51    3.53
  -3  -5   3   31.03    2.60
   3   5  -3   34.07    2.23
  -3   5   3   28.79    3.17
   3   5  -3   33.72    3.02
   2  -5  -3   89.26    2.14
   2  -5  -3   85.29    2.61
  -2  -5   3   82.06    1.56
  -2  -5   3   83.24    2.95
   2   5  -3   83.46    3.78
  -2   5   3   83.81    3.77
   2   5  -3   85.65    2.40
  -2   5   3   88.53    2.42
   2   5  -3   87.41    3.62
  -1  -5   3   30.25    1.10
   1  -5  -3   27.63    1.43
  -1  -5   3   27.59    1.83
   1  -5  -3   27.90    1.24
  -1   5   3   27.44    1.54
  -1   5   3   27.44    1.86
   1   5  -3   27.07    1.27
   1   5  -3   32.42    2.40
   1   5  -3   29.79    2.26
   0  -5   3    8.02    1.23
   0  -5  -3   10.77    1.36
   0  -5   3   10.76    0.94
   0   5  -3    6.44    2.36
   0   5   3    8.74    1.07
   0   5   3    7.28    0.79
   0   5   3    7.54    1.25
   0   5  -3    9.54    0.89
   0   5   3    7.24    2.32
   1  -5   3  256.22    4.31
  -1  -5  -3  246.77    5.23
   1  -5   3  259.09    4.95
  -1  -5  -3  251.97    6.25
   1  -5   3  259.18    4.45
  -1   5  -3  253.04    7.19
   1   5   3  241.58    6.21
   1   5   3  249.74    4.10
   1   5   3  239.52    5.11
  -2  -5  -3  137.03    3.76
   2  -5   3  137.77    3.61
  -2  -5  -3  141.78    4.77
   2  -5   3  141.12    2.97
   2   5   3  139.72    4.61
   2   5   3  134.95    3.80
  -2   5  -3  136.83    5.35
   2   5   3  136.87    2.49
   3  -5   3   28.25    1.81
  -3  -5  -3   27.52    2.89
   3  -5   3   26.33    2.11
  -3  -5  -3   25.80    2.56
  -3   5  -3   26.39    3.71
   3   5   3   27.99    2.63
   3   5   3   27.73    2.91
  -4  -5  -3   39.44    4.53
   4  -5   3   37.46    2.96
   4  -5   3   42.11    3.49
   4   5   3   39.20    4.04
   4   5   3   42.87    3.61
  -4   5  -3   49.50    5.95
   5  -5   3    1.77    1.94
   5  -5   3   -1.21    2.33
  -5  -5  -3    2.37    4.69
  -5   5  -3    9.50    5.15
   5   5   3   -2.87    2.32
  -5  -6   3   13.50    6.79
   5  -6  -3   12.95    2.66
   5  -6  -3   11.28    2.57
   5   6  -3    6.73    2.97
  -5   6   3   20.56    5.19
  -4  -6   3    4.46    2.03
   4  -6  -3    2.23    1.53
   4  -6  -3    2.34    1.39
  -4  -6   3    0.82    3.39
   4   6  -3   -0.04    1.74
   4   6  -3   -1.14    2.00
  -4   6   3    2.55    2.79
   3  -6  -3   12.43    1.59
  -3  -6   3   13.44    2.67
  -3  -6   3   14.26    2.15
   3  -6  -3   11.52    1.31
   3   6  -3   13.94    2.15
   3   6  -3   13.97    2.72
  -3   6   3   12.33    2.39
   2  -6  -3    8.54    0.99
   2  -6  -3    9.16    1.22
   2  -6  -3   10.02    1.19
  -2  -6   3    7.87    1.47
  -2  -6   3    7.13    0.79
   2   6  -3    8.40    1.94
  -2   6   3    9.13    1.89
   2   6  -3    9.99    1.93
   2   6  -3    9.88    1.55
  -1  -6   3  427.87    8.19
  -1  -6   3  439.78    6.48
   1  -6  -3  436.31    7.83
   1  -6  -3  425.00    6.74
   1   6  -3  415.04    9.83
  -1   6   3  428.18    7.88
  -1   6   3  426.65   10.48
   1   6  -3  430.60    7.22
   1   6  -3  425.66   11.00
   0  -6  -3    6.29    1.18
   0  -6   3    5.52    1.14
   0  -6   3    7.31    0.94
   0   6  -3   10.27    2.34
   0   6  -3    3.95    2.53
   0   6   3    6.22    1.37
   0   6  -3    7.28    0.93
   0   6   3    5.93    0.86
   0   6   3    5.22    2.52
   0   6   3    5.99    0.89
   1  -6   3  188.60    3.99
   1  -6   3  191.56    3.55
  -1  -6  -3  179.68    4.26
   1  -6   3  189.13    3.56
   1   6   3  185.92    3.33
   1   6   3  179.66    4.33
   1   6   3  181.77    4.82
   1   6   3  178.92    5.20
  -1   6  -3  186.93    5.95
  -2  -6  -3   22.02    2.13
   2  -6   3   21.23    1.60
  -2  -6  -3   21.44    2.10
   2  -6   3   20.72    1.40
  -2   6  -3   17.84    2.71
   2   6   3   22.12    2.37
   2   6   3   22.29    2.16
   3  -6   3    4.20    1.56
  -3  -6  -3    4.95    1.90
  -3  -6  -3    4.89    1.94
   3  -6   3    4.83    1.30
  -3   6  -3    3.09    2.27
   3   6   3    4.57    1.73
   3   6   3    7.60    2.21
  -4  -6  -3   18.01    3.50
   4  -6   3   14.09    2.61
  -4  -6  -3   19.85    2.66
   4  -6   3   14.14    2.42
   4   6   3   11.81    2.62
  -4   6  -3   19.16    3.97
   4   6   3   14.10    2.90
   5  -6   3   18.06    3.64
   5  -6   3   14.79    3.02
  -5  -6  -3   24.11    6.53
   5  -7  -3   -0.11    2.03
   5  -7  -3    3.29    2.07
  -5   7   3    4.88    4.42
  -4  -7   3    2.47    2.06
   4  -7  -3    0.18    1.42
   4   7  -3    0.32    2.06
  -4   7   3    1.42    2.80
  -3  -7   3   26.08    2.83
   3  -7  -3   27.81    2.04
   3  -7  -3   28.77    1.77
   3   7  -3   30.55    2.54
  -3   7   3   27.81    3.49
   3   7  -3   29.24    3.08
   3   7  -3   28.32    3.35
  -2  -7   3   -0.52    0.61
   2  -7  -3    0.07    0.74
   2  -7  -3   -0.31    0.83
  -2  -7   3   -0.94    1.53
   2   7  -3    1.62    1.26
   2   7  -3   -0.03    1.22
   2   7  -3    1.74    1.32
  -2   7   3   -0.64    1.23
   1  -7  -3   28.10    1.40
  -1  -7   3   29.23    1.28
   1  -7  -3   28.51    1.60
  -1  -7   3   26.16    2.07
   1   7  -3   28.75    2.67
  -1   7   3   27.22    1.59
  -1   7   3   25.93    1.95
   1   7  -3   31.89    3.06
   1   7  -3   26.65    1.30
   0  -7   3   15.11    1.16
   0  -7   3   12.50    1.45
   0  -7  -3   12.96    1.09
   0  -7  -3   12.75    1.55
   0   7  -3   16.12    3.10
   0   7   3   13.19    1.56
   0   7  -3   11.55    2.65
   0   7   3   13.18    1.34
   0   7  -3   13.61    1.12
  -1  -7  -3   12.76    1.90
   1  -7   3   11.32    1.12
   1  -7   3   12.58    1.11
   1  -7   3   11.69    1.15
   1   7   3   15.23    2.76
  -1   7  -3   11.42    2.62
   1   7   3   12.01    1.34
   1   7   3   13.27    1.79
  -2  -7  -3    8.03    0.81
   2  -7   3    7.47    1.19
  -2  -7  -3    8.31    1.55
  -2  -7  -3    8.65    1.82
   2  -7   3    8.76    1.18
   2   7   3    8.16    1.73
   2   7   3    8.87    1.91
  -2   7  -3    8.64    2.16
   3  -7   3    6.26    1.38
   3  -7   3    8.19    1.71
  -3  -7  -3    6.73    2.04
  -3  -7  -3    7.11    2.27
  -3   7  -3    5.42    2.55
   3   7   3    9.01    2.41
   3   7   3    5.58    1.84
  -4  -7  -3   12.13    2.34
   4  -7   3    8.01    2.12
  -4  -7  -3    8.51    3.10
  -4   7  -3   10.66    3.67
   4   7   3    4.53    2.29
   4   7   3    6.16    2.70
   4  -8  -3   -0.55    1.42
  -4  -8   3    2.64    2.04
   4   8  -3   -1.35    2.14
  -4   8   3    2.27    2.98
   4   8  -3    2.65    2.44
   3  -8  -3    1.91    1.32
   3  -8  -3    1.54    1.09
  -3  -8   3    0.19    2.07
   3   8  -3    2.69    1.89
   3   8  -3    2.62    1.96
  -3   8   3    1.67    1.97
   3   8  -3    2.30    1.83
   2  -8  -3   48.37    1.95
  -2  -8   3   46.09    1.51
  -2  -8   3   44.78    2.85
   2  -8  -3   46.77    1.95
   2   8  -3   49.27    3.36
   2   8  -3   47.84    3.21
   2   8  -3   47.68    2.25
  -2   8   3   45.65    3.10
   1  -8  -3    3.26    0.89
  -1  -8   3    4.06    0.85
   1  -8  -3    3.96    1.14
  -1  -8   3    3.36    1.45
   1   8  -3    4.57    1.79
   1   8  -3    4.77    1.95
   1   8  -3    3.36    0.90
  -1   8   3    2.64    1.15
  -1   8   3    2.55    1.23
   0  -8  -3  127.08    3.47
   0  -8   3  125.81    3.32
   0  -8   3  131.46    2.85
   0  -8  -3  129.16    2.82
   0   8  -3  129.19    2.99
   0   8  -3  119.32    5.12
   0   8   3  127.03    3.38
   0   8   3  124.77    3.67
  -1  -8  -3    9.76    1.69
   1  -8   3   10.81    1.22
  -1  -8  -3    8.32    1.00
   1  -8   3    8.82    1.09
   1  -8   3    8.69    1.16
   1   8   3    9.43    1.61
  -1   8  -3    7.78    2.12
   1   8   3   10.31    2.04
   1   8   3   11.50    1.76
   2  -8   3    0.43    1.05
  -2  -8  -3    0.58    1.67
  -2  -8  -3   -0.02    0.59
   2  -8   3   -0.21    0.98
  -2   8  -3   -0.64    1.86
   2   8   3    2.55    1.76
   2   8   3    0.97    1.88
   2   8   3    0.09    0.89
   3  -8   3   31.71    2.14
   3  -8   3   33.91    2.47
  -3  -8  -3   31.55    3.28
  -3  -8  -3   30.60    3.38
  -3   8  -3   33.15    4.70
   3   8   3   32.13    3.70
   3   8   3   34.66    3.18
  -4  -8  -3    6.81    2.37
  -4  -8  -3    3.80    2.80
   4  -8   3    5.72    2.04
   4   8   3    1.74    2.64
  -4   8  -3    7.08    3.57
  -4  -9   3   36.78    3.44
   4  -9  -3   31.11    2.68
   4   9  -3   24.84    4.34
   4   9  -3   36.19    4.69
  -4   9   3   39.19    5.42
   3  -9  -3   75.21    2.70
  -3  -9   3   76.15    3.96
   3  -9  -3   75.32    3.19
   3   9  -3   74.89    3.40
   3   9  -3   75.23    4.85
   3   9  -3   78.12    4.86
  -3   9   3   75.43    5.04
   2  -9  -3    0.94    1.13
   2  -9  -3    0.56    0.94
  -2  -9   3   -0.45    1.87
  -2  -9   3    0.14    0.80
   2   9  -3    2.71    1.39
   2   9  -3    3.73    2.09
  -2   9   3    0.42    1.47
   2   9  -3    0.40    1.47
  -2   9   3    0.44    1.34
  -1  -9   3   21.14    1.97
   1  -9  -3   21.22    1.76
   1  -9  -3   20.98    1.46
  -1  -9   3   22.36    1.35
  -1   9   3   21.07    1.78
   1   9  -3   22.68    3.35
   1   9  -3   23.09    3.09
   1   9  -3   21.24    1.41
  -1   9   3   19.53    1.95
   0  -9  -3  113.41    3.42
   0  -9  -3  116.01    2.75
   0  -9   3  117.92    2.78
   0  -9   3  113.43    3.23
   0   9  -3  114.02    2.87
   0   9   3  107.62    3.57
   0   9   3  111.45    3.25
   0   9  -3  107.73    5.06
  -1  -9  -3   54.37    2.77
   1  -9   3   55.04    1.97
  -1  -9  -3   56.46    1.82
   1  -9   3   56.31    2.07
   1  -9   3   56.52    2.11
   1   9   3   54.98    2.69
   1   9   3   56.55    2.73
   1   9   3   57.30    4.07
  -1   9  -3   53.96    3.84
  -2  -9  -3   87.80    2.18
   2  -9   3   91.76    2.83
  -2  -9  -3   85.67    3.58
   2  -9   3   89.66    3.11
   2   9   3   92.34    4.72
   2   9   3   88.93    3.65
   2   9   3   90.52    3.65
  -2   9  -3   91.27    5.02
   3  -9   3   69.59    3.13
   3  -9   3   67.89    2.73
  -3  -9  -3   68.23    3.91
  -3   9  -3   76.18    5.92
   3   9   3   67.27    3.74
   3   9   3   71.03    4.80
  -4  -9  -3    8.66    2.53
   4  -9   3    5.48    2.00
  -4  -9  -3    2.13    2.87
   4   9   3    2.67    2.53
  -4   9  -3    9.29    3.84
   4   9   3    3.44    2.75
   4 -10  -3    0.59    1.61
  -4 -10   3    6.31    2.49
  -4  10   3    6.94    3.87
   4  10  -3    1.81    2.69
   4  10  -3   -0.76    2.42
   3 -10  -3    3.92    1.28
   3 -10  -3    7.55    1.71
  -3 -10   3    8.04    2.41
   3  10  -3    4.47    2.28
   3  10  -3    5.62    2.33
   3  10  -3    6.90    2.07
  -3  10   3    6.84    2.45
  -2 -10   3   -1.31    1.77
   2 -10  -3    0.50    1.23
   2 -10  -3    0.40    1.05
  -2 -10   3   -0.82    0.86
  -2  10   3   -0.50    1.54
   2  10  -3    0.79    1.41
   2  10  -3    2.15    2.01
   2  10  -3   -0.13    1.73
  -2  10   3    0.72    1.48
  -1 -10   3  151.66    3.21
  -1 -10   3  149.77    4.29
   1 -10  -3  151.28    3.95
   1 -10  -3  152.51    3.52
  -1  10   3  148.31    4.08
   1  10  -3  147.64    6.26
   1  10  -3  149.54    3.45
  -1  10   3  152.42    4.98
   1  10  -3  145.64    5.96
   0 -10  -3    3.29    1.49
   0 -10   3    3.96    1.41
   0 -10  -3    3.40    0.90
   0 -10   3    4.02    1.00
   0  10   3    5.41    1.31
   0  10  -3    4.58    2.41
   0  10   3    4.37    1.43
   0  10  -3    3.91    1.08
   1 -10   3  139.42    3.41
   1 -10   3  139.52    3.61
  -1 -10  -3  139.65    3.06
   1 -10   3  140.56    3.37
  -1 -10  -3  137.87    4.16
   1  10   3  135.37    3.99
   1  10   3  129.91    5.63
   1  10   3  127.12    4.53
  -1  10  -3  142.30    5.90
   2 -10   3   35.49    2.06
   2 -10   3   35.84    2.25
  -2 -10  -3   39.90    3.27
  -2 -10  -3   36.09    1.55
   2  10   3   40.73    4.24
   2  10   3   35.97    2.96
  -2  10  -3   32.12    4.03
   2  10   3   34.45    2.59
  -3 -10  -3    6.18    2.50
   3 -10   3    3.41    1.52
   3 -10   3    6.03    1.69
  -3  10  -3    6.21    3.30
   3  10   3    5.87    2.57
   3  10   3    3.71    2.48
   3  10   3    5.67    1.70
   4 -10   3    4.29    2.00
  -4 -10  -3    7.86    2.57
  -4  10  -3   12.09    4.30
   4  10   3    0.52    2.74
   4  10   3    0.38    2.71
   4 -11  -3    1.63    1.64
  -4 -11   3    5.19    2.60
  -4  11   3   10.48    4.44
   4  11  -3    2.01    2.86
   4  11  -3   -1.68    2.70
   3 -11  -3    2.64    1.49
   3 -11  -3   -0.08    1.21
  -3 -11   3    2.66    2.26
   3  11  -3    0.23    2.09
   3  11  -3    1.18    2.49
  -3  11   3    3.72    2.34
   2 -11  -3    6.89    1.54
  -2 -11   3    5.16    2.15
  -2 -11   3    6.74    1.12
   2 -11  -3    6.40    1.35
   2  11  -3    7.19    2.39
  -2  11   3    6.50    1.77
   2  11  -3    9.55    1.68
  -2  11   3    5.71    2.01
   2  11  -3    8.88    2.67
   1 -11  -3   13.39    1.93
  -1 -11   3   11.12    1.36
  -1 -11   3   11.98    2.20
   1 -11  -3   11.93    1.55
  -1  11   3   12.66    1.89
  -1  11   3   12.12    2.22
   1  11  -3   12.80    3.19
   1  11  -3   13.58    2.79
   1  11  -3   10.45    1.41
   0 -11  -3    0.79    1.56
   0 -11   3   -0.49    1.37
   0 -11   3    1.05    1.02
   0 -11  -3    0.04    0.81
   0  11  -3    2.75    2.51
   0  11   3    0.37    1.29
   0  11   3   -0.80    1.31
   0  11  -3    0.81    1.00
  -1 -11  -3   12.67    1.41
  -1 -11  -3   14.55    2.39
   1 -11   3   11.20    1.76
   1 -11   3   13.02    1.70
   1  11   3   14.43    2.04
  -1  11  -3   13.19    3.05
   1  11   3   16.67    3.21
   1  11   3   14.33    2.69
   2 -11   3   10.54    1.65
   2 -11   3    9.36    1.55
  -2 -11  -3    6.84    2.42
  -2 -11  -3    8.88    1.11
   2  11   3    7.98    2.30
   2  11   3   12.93    2.85
  -2  11  -3    8.96    2.85
   2  11   3    8.33    1.81
  -3 -11  -3    1.18    2.41
   3 -11   3    0.69    1.46
   3 -11   3   -1.05    1.37
   3  11   3    0.70    2.52
   3  11   3    0.08    1.56
  -3  11  -3    3.67    3.57
   3  11   3    2.49    2.47
  -4 -11  -3   13.79    3.06
   4 -11   3   12.16    2.53
  -4 -12   3    8.34    2.78
   4 -12  -3    4.17    1.86
  -4  12   3    9.88    4.41
   4  12  -3    1.12    2.89
   3 -12  -3    2.00    1.39
  -3 -12   3    3.58    2.45
   3 -12  -3    3.22    1.46
   3  12  -3    1.47    2.77
  -3  12   3    4.11    2.40
   3  12  -3    0.75    2.35
   2 -12  -3   48.24    2.59
  -2 -12   3   50.22    2.03
   2 -12  -3   47.76    2.42
  -2 -12   3   49.83    3.78
  -2  12   3   48.30    2.96
   2  12  -3   50.19    2.58
   2  12  -3   48.12    4.50
   2  12  -3   58.52    5.45
  -2  12   3   49.61    4.22
   1 -12  -3    4.30    1.25
   1 -12  -3    3.75    1.73
  -1 -12   3    3.36    2.07
  -1 -12   3    4.68    1.17
   1  12  -3    6.52    2.87
   1  12  -3    3.87    1.29
  -1  12   3    4.94    1.63
  -1  12   3    4.52    1.77
   1  12  -3    7.85    3.40
   0 -12   3   11.17    1.93
   0 -12  -3   11.79    2.12
   0 -12  -3   10.44    1.42
   0 -12   3   10.62    1.42
   0  12   3   11.70    1.91
   0  12   3    9.46    1.78
   0  12  -3   10.06    1.51
   0  12  -3   11.81    3.29
  -1 -12  -3   24.13    1.64
   1 -12   3   24.58    2.01
  -1 -12  -3   25.50    2.80
   1 -12   3   24.06    2.05
   1  12   3   29.26    5.23
   1  12   3   22.64    2.65
   1  12   3   25.70    3.18
  -1  12  -3   28.31    3.92
   2 -12   3   20.72    1.97
  -2 -12  -3   18.22    1.56
  -2 -12  -3   20.86    3.12
   2 -12   3   21.22    2.17
   2  12   3   25.57    5.03
  -2  12  -3   21.03    3.70
   2  12   3   19.23    2.96
   2  12   3   15.91    2.84
   3 -12   3    1.94    1.62
   3 -12   3    5.88    1.84
  -3 -12  -3    9.15    2.93
  -3  12  -3    9.13    4.12
   3  12   3    6.64    2.67
   3  12   3    2.13    2.65
  -4 -12  -3   20.36    3.34
   4 -12   3   16.99    2.73
  -4  12  -3   27.18    5.96
   4 -13  -3   15.94    2.55
  -4 -13   3   24.35    4.07
   4  13  -3   14.30    3.87
  -4  13   3   26.95    5.53
   3 -13  -3   27.85    2.45
  -3 -13   3   27.75    3.75
   3 -13  -3   22.13    2.20
  -3  13   3   32.88    4.71
   3  13  -3   18.08    4.13
   3  13  -3   24.91    4.96
   2 -13  -3   13.44    2.31
  -2 -13   3   15.73    2.91
   2 -13  -3   15.10    2.01
  -2 -13   3   14.12    1.53
   2  13  -3   11.62    3.05
  -2  13   3   13.39    2.13
   2  13  -3   14.36    3.25
   2  13  -3   17.10    2.06
  -2  13   3   18.65    2.98
   1 -13  -3    8.49    2.00
   1 -13  -3    8.46    1.50
  -1 -13   3    8.10    2.41
  -1 -13   3    6.71    1.30
  -1  13   3    8.87    1.87
  -1  13   3    7.08    1.83
   1  13  -3    7.29    3.86
   1  13  -3    8.71    1.54
   1  13  -3   10.71    3.29
   0 -13  -3   27.66    2.80
   0 -13   3   28.68    2.05
   0 -13   3   25.20    2.71
   0 -13  -3   27.48    1.95
   0  13  -3   26.29    2.04
   0  13   3   21.91    3.35
   0  13   3   25.72    2.41
   1 -13   3    0.80    1.51
  -1 -13  -3    0.69    1.07
   1 -13   3    1.13    1.35
  -1 -13  -3    0.08    2.06
   1  13   3    0.84    1.96
   1  13   3    1.11    1.78
   1  13   3    3.29    3.79
  -1  13  -3   -1.19    3.26
  -2 -13  -3   46.46    2.10
   2 -13   3   49.09    2.67
  -2 -13  -3   46.30    4.01
   2 -13   3   47.41    2.67
   2  13   3   43.89    5.67
  -2  13  -3   50.91    5.76
   2  13   3   45.94    3.58
  -3 -13  -3   18.08    3.30
   3 -13   3   13.80    2.04
   3 -13   3   16.03    2.31
   3  13   3   18.61    2.97
   3  13   3   12.21    3.05
  -4 -13  -3    4.92    2.97
   4 -13   3    0.20    1.89
  -4  13  -3    9.32    4.55
  -4 -14   3    5.81    3.02
  -4  14   3   10.60    4.70
  -3 -14   3   14.86    3.11
   3 -14  -3   13.36    2.16
   3 -14  -3   13.43    1.96
   3  14  -3    8.73    3.26
  -3  14   3   22.64    4.55
   3  14  -3    8.67    3.34
   2 -14  -3    0.54    1.32
   2 -14  -3    1.34    1.72
  -2 -14   3    2.37    2.52
  -2 -14   3   -0.54    1.18
   2  14  -3    2.55    3.09
  -2  14   3    2.27    2.16
   2  14  -3   -0.58    2.73
  -2  14   3    1.06    1.79
   2  14  -3    2.17    1.49
   1 -14  -3   24.20    2.65
  -1 -14   3   21.82    2.05
  -1 -14   3   21.72    2.85
   1 -14  -3   23.29    1.94
   1  14  -3   29.64    5.30
   1  14  -3   21.77    2.01
  -1  14   3   26.74    3.01
  -1  14   3   22.08    2.48
   1  14  -3   22.94    5.10
   0 -14   3    3.30    1.93
   0 -14  -3    4.71    2.24
   0 -14  -3    2.81    1.29
   0 -14   3    2.86    1.36
   0  14   3    3.89    1.89
   0  14   3    5.39    2.14
   0  14  -3    3.22    1.45
   1 -14   3    3.74    1.75
  -1 -14  -3    3.86    1.25
  -1 -14  -3    4.89    2.53
   1 -14   3    4.41    1.46
   1  14   3    3.57    2.08
  -1  14  -3    3.37    3.94
   1  14   3    5.42    4.47
  -2 -14  -3   11.70    1.47
   2 -14   3   12.78    1.89
  -2 -14  -3   14.82    2.77
   2 -14   3   12.48    1.90
   2  14   3   10.50    3.26
   2  14   3   15.92    2.62
  -2  14  -3   18.78    3.91
  -3 -14  -3   -0.20    2.83
   3 -14   3    0.84    1.57
   3 -14   3   -1.96    1.58
   3  14   3   -2.36    2.93
   3  14   3    2.80    2.38
   4 -14   3    2.19    2.10
  -4 -14  -3    7.17    3.27
  -4  14  -3   11.62    4.87
   3 -15  -3   11.87    2.06
   3 -15  -3   13.36    2.16
  -3 -15   3   17.07    3.36
   3  15  -3    6.24    3.50
   3  15  -3    7.07    3.62
  -3  15   3   23.29    4.65
  -2 -15   3    3.29    2.57
  -2 -15   3   -0.05    1.26
   2 -15  -3    2.16    1.49
  -2  15   3    3.45    1.85
   2  15  -3    3.84    3.34
   2  15  -3   -1.18    2.97
  -2  15   3    6.36    2.48
  -1 -15   3   35.32    3.59
   1 -15  -3   38.36    2.46
   1 -15  -3   35.97    2.93
  -1 -15   3   34.90    2.36
  -1  15   3   35.66    2.88
   1  15  -3   35.55    2.32
  -1  15   3   38.14    3.32
   1  15  -3   32.44    5.47
   1  15  -3   34.45    5.57
   0 -15   3   12.23    2.47
   0 -15   3   12.10    1.73
   0 -15  -3   12.62    1.76
   0 -15  -3   13.03    2.68
   0  15   3   12.83    2.34
   0  15  -3   12.84    1.96
   1 -15   3    5.92    1.59
  -1 -15  -3    4.77    1.38
  -1 -15  -3    5.99    2.62
   1 -15   3    7.29    1.93
   1  15   3    8.26    4.88
   1  15   3    5.89    2.15
  -1  15  -3    5.37    4.37
   2 -15   3   -0.95    1.55
  -2 -15  -3   -1.23    2.32
   2 -15   3    0.12    1.34
  -2 -15  -3   -0.96    1.09
   2  15   3    1.91    2.19
  -2  15  -3    3.03    3.26
   2  15   3    1.94    3.32
   3 -15   3    7.81    2.07
   3 -15   3    9.97    2.17
  -3 -15  -3   14.38    3.52
   3  15   3   14.99    2.93
   3  15   3    4.22    3.57
   3 -16  -3    0.36    1.64
  -3 -16   3    3.68    2.82
   3 -16  -3    0.11    1.55
   3  16  -3   -5.20    3.26
   2 -16  -3   24.58    2.50
  -2 -16   3   21.96    2.26
  -2 -16   3   32.81    4.15
  -2  16   3   26.57    2.94
   2  16  -3   23.73    4.43
   2  16  -3   16.83    4.15
   1 -16  -3   14.95    2.15
   1 -16  -3   17.97    2.56
  -1 -16   3   14.93    2.79
  -1 -16   3   15.36    1.88
   1  16  -3   16.26    1.95
   1  16  -3   11.84    4.52
  -1  16   3   22.99    2.99
  -1  16   3   19.52    2.67
   1  16  -3   15.65    3.60
   0 -16  -3   47.02    4.01
   0 -16   3   47.72    3.39
   0 -16  -3   47.19    2.62
   0 -16   3   45.45    2.66
   0  16   3   49.26    3.21
   0  16  -3   46.69    2.76
   1 -16   3    9.28    2.07
  -1 -16  -3    7.10    1.50
   1 -16   3    7.04    1.70
  -1 -16  -3   10.60    2.85
   1  16   3   11.59    4.96
  -1  16  -3   15.54    4.47
   1  16   3    9.93    2.35
   2 -16   3    2.45    1.49
   2 -16   3    0.80    1.65
  -2 -16  -3    1.44    2.61
  -2 -16  -3    0.24    1.25
  -2  16  -3    7.06    3.50
   2  16   3    2.37    2.12
   2  16   3    3.86    3.77
  -3 -16  -3    0.97    3.24
   3 -16   3    0.07    1.61
  -3  16  -3   16.51    5.50
   3  16   3    4.86    2.54
  -3 -17   3    8.12    3.29
   3 -17  -3    4.04    1.86
   3 -17  -3   -0.36    1.81
  -2 -17   3   27.12    2.33
   2 -17  -3   32.00    2.80
  -2 -17   3   40.23    4.51
   2  17  -3   38.68    6.87
  -2  17   3   34.10    3.19
  -1 -17   3   -1.14    1.40
   1 -17  -3    0.39    2.18
  -1 -17   3    1.15    2.34
   1 -17  -3    1.03    1.51
  -1  17   3    1.40    1.95
   1  17  -3   -2.10    3.09
   1  17  -3    2.82    4.52
   1  17  -3    1.79    1.45
   0 -17   3    0.59    2.18
   0 -17   3   -0.35    1.51
   0 -17  -3    0.41    2.35
   0 -17  -3    0.57    1.42
   0  17   3    1.89    2.02
   0  17  -3    1.48    1.53
   0  17  -3   -4.26    6.74
  -1 -17  -3    1.39    1.41
   1 -17   3   -1.52    1.40
  -1 -17  -3    1.61    2.79
   1 -17   3    2.39    1.85
  -1  17  -3    6.69    3.93
   1  17   3    3.37    2.07
   1  17   3    4.41    4.77
  -2 -17  -3   15.45    3.51
   2 -17   3   14.36    2.17
  -2 -17  -3   14.10    1.81
   2 -17   3   12.41    2.14
   2  17   3   20.70    3.05
   2  17   3   13.11    4.44
  -3 -17  -3    5.20    3.44
   3 -17   3    1.63    1.78
   3  17   3    5.45    2.67
   3 -18  -3    1.79    2.04
  -3 -18   3   13.74    3.47
   3 -18  -3    4.76    1.99
   3  18  -3   -4.89    4.25
  -2 -18   3    3.66    3.06
   2 -18  -3   -1.56    1.59
  -2  18   3    1.31    2.04
   2  18  -3    0.80    4.08
   1 -18  -3   -1.70    2.11
   1 -18  -3    0.52    1.60
  -1 -18   3   -1.36    1.52
  -1 -18   3    2.02    2.56
   1  18  -3    1.22    1.56
  -1  18   3   -0.30    1.97
   1  18  -3    5.89    4.72
   1  18  -3    2.01    3.42
   0 -18  -3   -0.60    1.42
   0 -18   3   -1.36    1.53
   0 -18  -3   -0.31    2.53
   0 -18   3    0.38    2.16
   0  18  -3    1.35    1.57
   0  18   3    1.22    2.00
  -1 -18  -3    4.34    3.01
  -1 -18  -3    2.48    1.51
   1 -18   3    0.76    1.73
   1 -18   3    7.29    2.15
   1  18   3    6.36    2.18
   1  18   3   10.76    4.94
  -1  18  -3   15.28    4.63
  -2 -18  -3    1.84    1.63
  -2 -18  -3    5.08    3.30
   2 -18   3    4.24    1.75
   2 -18   3    0.20    1.89
   2  18   3    3.92    4.34
   2  18   3    6.86    2.25
   2 -19  -3   -1.89    1.75
  -2 -19   3    3.24    3.12
   2  19  -3   -0.33    4.60
  -2  19   3    1.07    2.10
   1 -19  -3    3.04    1.81
  -1 -19   3   -2.54    1.68
  -1 -19   3    3.79    2.66
   1 -19  -3    2.47    2.43
  -1  19   3    2.87    2.19
   0 -19   3    7.50    2.52
   0 -19  -3    6.53    1.93
   0 -19   3    4.34    1.91
   0 -19  -3    7.63    2.98
   0  19   3    7.14    2.29
   0  19  -3    6.50    1.96
  -1 -19  -3    7.95    3.21
  -1 -19  -3    4.78    1.71
   1  19   3   11.48    2.57
  -1  19  -3   19.54    4.70
   2 -19   3   -0.52    1.89
   2 -19   3    3.78    1.73
  -2 -19  -3    3.87    3.52
   2  19   3    3.55    4.97
   2  19   3    7.81    2.47
  -2 -20   3   19.65    3.85
  -2  20   3   16.21    3.04
   2  20  -3    8.40    5.24
   1 -20  -3    4.01    2.65
   1 -20  -3    1.42    1.88
  -1 -20   3    9.10    3.05
  -1  20   3    7.06    2.50
   0 -20   3   46.04    3.80
   0 -20  -3   37.00    3.01
   0 -20  -3   40.62    4.25
   0 -20   3   35.64    3.11
   0  20   3   42.42    3.57
   0  20  -3   43.27    3.07
  -1 -20  -3    2.15    3.18
   1  20   3    2.96    2.22
   2 -20   3    9.34    2.13
  -2 -20  -3   10.85    3.89
   2  20   3   13.85    2.85
   2  20   3    4.55    5.40
  -1 -21   3    3.44    2.93
   1 -21  -3   -2.78    1.83
   1 -21  -3    0.61    2.63
  -1  21   3    1.92    2.38
   0 -21  -3   -1.33    1.77
   0 -21  -3    1.94    2.96
   0 -21   3    6.43    2.64
   0 -21   3   -2.06    1.88
   0  21  -3    2.46    1.89
   0  21   3    2.20    2.24
   1 -21   3    1.88    1.62
  -1 -21  -3   -2.11    1.77
  -1 -21  -3    3.21    3.31
   1 -21   3   -1.41    1.98
   1  21   3    8.59    2.66
  -1 -22   3    9.38    3.30
   1 -22  -3   -2.25    2.02
  -1  22   3    1.93    2.55
   0 -22   3    7.14    2.76
   0 -22  -3   -0.84    1.92
   0 -22  -3    4.93    3.19
   0  22   3    3.54    2.51
   0  22  -3    5.09    2.09
  -1 -22  -3    5.91    3.57
  -1 -22  -3    0.17    1.96
   1 -22   3    3.44    1.91
   1  22   3    9.48    2.78
   5   0  -4   -0.73    1.80
  -5   0   4   -1.10    3.87
   4   0  -4   34.62    2.30
  -4   0   4   38.15    4.58
   4   0  -4   33.85    3.09
   3   0  -4   -0.24    0.97
   3   0  -4    0.13    0.95
  -3   0   4    0.16    1.57
  -3   0   4    0.27    1.15
  -2   0   4  354.79    9.79
  -2   0   4  346.77    6.81
   2   0  -4  359.05    6.48
  -2   0   4  359.67    5.25
   2   0  -4  361.53    8.59
  -1   0   4    0.00    0.81
  -1   0   4   -0.32    0.58
  -1   0   4   -0.46    0.52
   1   0  -4   -0.43    0.53
  -1   0   4   -0.17    0.89
   0   0  -4  176.40    5.07
   0   0   4  202.82    3.18
   0   0   4  197.74    3.49
   0   0   4  201.70    3.77
   1   0   4    0.39    0.69
   1   0   4    0.23    0.51
  -1   0  -4    0.42    0.67
   1   0   4    1.54    0.91
   2   0   4   30.30    1.91
   2   0   4   32.49    1.88
  -2   0  -4   31.41    2.48
  -2   0  -4   30.17    1.43
   2   0   4   31.94    1.30
   3   0   4    0.28    1.48
   3   0   4    0.31    0.79
  -3   0  -4   -0.93    1.57
  -3   0  -4    0.64    1.07
   3   0   4   -0.02    0.97
   4   0   4   95.03    4.89
  -4   0  -4  105.55    6.47
   4   0   4   92.61    4.11
  -5   0  -4    4.03    3.93
   5   0   4   -1.78    1.99
   5  -1  -4   -2.12    1.85
  -5  -1   4    3.61    4.46
   5  -1  -4   -0.03    1.87
  -5   1   4    2.76    3.86
   5   1  -4   -1.46    1.95
   4  -1  -4   35.55    3.33
  -4  -1   4   36.40    4.77
   4  -1  -4   34.76    2.32
  -4   1   4   39.22    4.69
   4   1  -4   35.30    3.40
   4   1  -4   32.73    2.41
   3  -1  -4   66.45    2.44
   3  -1  -4   64.88    3.37
  -3  -1   4   61.20    4.01
  -3  -1   4   61.41    2.54
   3  -1  -4   62.77    1.46
   3   1  -4   61.69    3.33
   3   1  -4   64.05    2.36
  -3   1   4   63.40    4.04
  -3   1   4   60.91    2.30
   2  -1  -4   57.42    2.59
   2  -1  -4   60.61    1.88
  -2  -1   4   56.09    2.15
  -2  -1   4   59.74    1.24
  -2  -1   4   59.80    3.21
  -2   1   4   58.01    3.12
  -2   1   4   57.02    1.97
   2   1  -4   59.06    2.63
   2   1  -4   60.00    1.77
  -1  -1   4   46.65    1.25
  -1  -1   4   45.34    1.71
  -1  -1   4   47.60    2.36
  -1   1   4   45.30    1.63
  -1   1   4   48.32    2.25
  -1   1   4   47.29    1.43
   1   1  -4   47.04    1.79
  -1   1   4   48.19    1.34
   1   1  -4   47.52    1.10
   0  -1   4   65.03    1.43
   0  -1  -4   63.89    2.21
   0  -1   4   65.42    1.50
   0  -1   4   66.35    1.71
   0   1   4   65.42    1.88
   0   1   4   64.26    1.55
   0   1  -4   63.34    2.99
   0   1   4   62.83    1.75
   1  -1   4  129.10    2.85
   1  -1   4  126.92    2.44
  -1  -1  -4  126.65    2.79
  -1  -1  -4  124.62    3.82
  -1   1  -4  120.47    4.12
   1   1   4  130.84    3.28
  -1   1  -4  128.60    2.57
   1   1   4  122.54    2.87
   1   1   4  127.96    2.38
   2  -1   4   73.04    2.51
   2  -1   4   73.09    1.84
  -2  -1  -4   71.30    2.18
   2  -1   4   70.45    2.81
  -2  -1  -4   70.03    3.37
   2   1   4   72.66    2.85
  -2   1  -4   70.65    1.83
   2   1   4   70.61    1.72
  -2   1  -4   69.38    3.47
   2   1   4   72.36    2.56
  -3  -1  -4   26.50    3.29
   3  -1   4   29.48    1.51
   3  -1   4   30.19    2.45
   3  -1   4   30.01    2.32
  -3  -1  -4   28.93    1.92
  -3   1  -4   28.19    3.24
   3   1   4   29.97    1.32
   3   1   4   28.42    2.44
   3   1   4   31.86    2.42
  -4  -1  -4    1.98    2.59
   4  -1   4    1.11    1.99
   4  -1   4    0.68    1.43
  -4   1  -4    4.50    3.11
   4   1   4   -1.11    1.99
   4   1   4    0.17    1.52
   5  -1   4    6.82    2.47
   5  -1   4    1.11    2.81
   5   1   4    4.56    2.55
   5  -2  -4   -2.80    1.78
   5  -2  -4    0.71    1.91
  -5  -2   4   -1.10    4.36
  -5   2   4    0.51    3.63
   5   2  -4   -1.55    2.05
  -4  -2   4   22.14    4.72
   4  -2  -4   23.16    2.12
  -4  -2   4   24.83    2.30
   4  -2  -4   23.14    2.92
   4   2  -4   21.82    2.23
   4   2  -4   23.50    3.18
  -4   2   4   26.79    4.35
   3  -2  -4    5.43    1.21
  -3  -2   4    5.02    1.96
   3  -2  -4    5.14    0.72
  -3  -2   4    3.90    1.43
   3  -2  -4    3.27    1.10
  -3   2   4    3.88    1.79
   3   2  -4    5.12    1.20
  -3   2   4    5.71    1.20
   3   2  -4    4.96    1.46
  -2  -2   4   26.49    0.79
   2  -2  -4   25.89    1.00
  -2  -2   4   26.96    2.42
  -2  -2   4   25.52    1.64
   2  -2  -4   25.81    1.35
  -2   2   4   24.96    1.41
   2   2  -4   25.73    1.21
   2   2  -4   26.39    1.97
  -2   2   4   24.75    2.24
  -1  -2   4   32.02    1.60
  -1  -2   4   32.45    1.06
   1   2  -4   34.81    1.66
   1   2  -4   30.30    1.99
  -1   2   4   30.57    1.90
  -1   2   4   30.56    1.29
   1   2  -4   34.81    0.82
  -1   2   4   31.06    1.23
  -1   2   4   33.00    1.51
   0  -2   4  192.11    3.64
   0  -2   4  188.56    3.12
   0  -2  -4  192.38    4.47
   0  -2   4  194.63    3.24
   0   2  -4  182.43    5.63
   0   2   4  189.35    3.19
   0   2   4  176.99    3.66
   0   2  -4  172.97    4.62
   1  -2   4   90.97    2.00
   1  -2   4   89.59    1.95
   1  -2   4   89.42    2.29
  -1  -2  -4   86.62    2.36
  -1  -2  -4   86.42    2.89
   1   2   4   90.56    2.69
   1   2   4   86.20    2.40
  -1   2  -4   83.45    3.48
   1   2   4   88.40    1.94
  -2  -2  -4   32.81    2.32
   2  -2   4   34.64    1.43
   2  -2   4   35.42    1.82
  -2  -2  -4   32.26    1.74
   2   2   4   33.93    1.85
   2   2   4   34.39    1.26
   2   2   4   34.17    2.06
  -2   2  -4   33.92    1.10
  -2   2  -4   32.29    2.70
   3  -2   4   10.88    1.19
   3  -2   4   13.67    1.99
  -3  -2  -4   11.26    1.82
  -3  -2  -4   12.30    2.30
   3  -2   4   10.44    1.87
  -3   2  -4    9.61    2.38
   3   2   4   10.27    2.01
   3   2   4   14.11    2.23
  -4  -2  -4    1.38    2.46
   4  -2   4    0.26    1.41
   4  -2   4    0.85    1.94
  -4   2  -4    2.36    2.96
   4   2   4    0.41    1.60
   4   2   4   -0.18    2.19
  -5  -2  -4    1.00    3.37
   5  -2   4   -2.02    1.75
  -5   2  -4    4.83    4.38
   5   2   4   -3.54    2.00
   5  -3  -4    0.68    1.88
  -5  -3   4   -1.64    4.76
   5  -3  -4   -1.59    1.83
  -5   3   4    0.49    3.78
   5   3  -4   -3.69    2.06
   4  -3  -4   50.95    3.75
  -4  -3   4   49.92    5.53
  -4  -3   4   50.36    2.99
   4  -3  -4   51.07    2.78
   4   3  -4   50.62    4.06
  -4   3   4   51.75    5.08
   4   3  -4   45.37    2.71
  -3  -3   4   78.91    4.55
   3  -3  -4   77.89    2.74
  -3  -3   4   74.84    3.09
   3  -3  -4   75.64    3.63
   3  -3  -4   78.75    1.95
  -3   3   4   77.54    2.52
  -3   3   4   76.53    4.37
   3   3  -4   79.74    3.94
   3   3  -4   77.22    2.57
  -2  -3   4    6.12    0.61
   2  -3  -4    5.49    0.79
   2  -3  -4    6.54    0.96
  -2  -3   4    6.44    1.65
  -2  -3   4    6.94    1.32
  -2   3   4    6.61    1.15
   2   3  -4    6.14    1.24
   2   3  -4    6.69    0.97
  -2   3   4    5.72    1.47
  -1  -3   4  317.21    4.82
  -1  -3   4  318.62    6.21
   1   3  -4  332.80    7.35
   1   3  -4  325.61    8.42
  -1   3   4  327.24    6.13
  -1   3   4  312.09    5.84
   1   3  -4  321.19    5.20
  -1   3   4  321.67    8.07
  -1   3   4  326.71    5.10
   0  -3   4  114.39    2.14
   0  -3   4  112.67    2.26
   0  -3   4  109.75    2.59
   0  -3  -4  113.36    2.72
   0  -3  -4  120.01    2.68
   0   3  -4  101.41    4.16
   0   3  -4  120.15    4.73
   0   3   4  108.43    2.79
   1  -3   4   36.00    1.11
  -1  -3  -4   34.89    1.71
   1  -3   4   37.39    1.49
  -1  -3  -4   35.38    1.68
   1  -3   4   35.78    1.46
   1   3   4   40.42    1.98
  -1   3  -4   32.95    2.74
   1   3   4   35.14    1.31
   1   3   4   36.96    1.98
   2  -3   4   94.24    2.28
  -2  -3  -4   96.56    3.75
   2  -3   4   94.45    2.90
  -2  -3  -4   95.09    2.81
   2   3   4   97.50    2.01
  -2   3  -4   93.95    4.25
   2   3   4   99.09    3.59
   2   3   4   96.13    3.05
   3  -3   4   33.90    2.36
  -3  -3  -4   32.28    3.12
  -3  -3  -4   33.88    2.40
   3  -3   4   35.62    1.83
   3  -3   4   35.23    2.56
   3   3   4   36.54    2.65
   3   3   4   35.45    2.84
  -3   3  -4   36.10    3.75
  -4  -3  -4    1.15    2.45
   4  -3   4    0.21    1.86
   4  -3   4    1.70    1.44
   4   3   4    0.38    1.73
  -4   3  -4    3.94    3.06
   4   3   4   -1.26    2.18
   5  -3   4   13.53    3.07
  -5  -3  -4   22.11    4.70
   5  -3   4   14.68    2.77
   5   3   4    9.51    2.99
   5   3   4    5.04    3.45
   5  -4  -4    0.38    1.89
   5  -4  -4   -1.52    1.73
  -5  -4   4   -2.29    5.05
   5   4  -4   -3.76    2.05
  -5   4   4    3.85    4.10
  -4  -4   4   23.56    5.24
  -4  -4   4   25.56    2.61
   4  -4  -4   21.28    2.22
   4  -4  -4   26.45    3.03
   4   4  -4   16.80    2.27
   4   4  -4   22.00    3.39
  -4   4   4   27.20    4.84
  -3  -4   4   23.14    3.24
   3  -4  -4   21.49    1.70
  -3  -4   4   19.96    2.38
   3  -4  -4   20.50    1.29
  -3   4   4   21.92    1.67
   3   4  -4   22.87    1.83
   3   4  -4   23.66    2.73
  -3   4   4   20.52    2.86
  -2  -4   4   85.08    1.60
  -2  -4   4   84.56    2.86
   2  -4  -4   87.49    2.05
   2  -4  -4   89.91    2.56
   2   4  -4   85.28    2.20
  -2   4   4   83.68    3.72
   2   4  -4   87.79    3.52
  -2   4   4   86.20    2.48
  -1  -4   4   36.09    1.72
  -1  -4   4   38.90    1.27
  -1   4   4   37.92    1.42
  -1   4   4   36.41    1.61
  -1   4   4   39.04    2.04
   1   4  -4   39.73    2.36
   1   4  -4   37.85    1.11
  -1   4   4   38.47    1.80
   1   4  -4   43.95    2.28
   0  -4   4    1.29    0.77
   0  -4   4    0.27    0.42
   0  -4   4   -0.38    0.81
   0  -4  -4    1.60    1.01
   0   4  -4   -0.75    2.01
   0   4   4   -0.99    1.15
   0   4   4   -0.32    0.68
   1  -4   4    0.19    0.65
  -1  -4  -4    0.14    0.68
   1  -4   4    0.34    0.54
  -1  -4  -4    1.39    1.04
   1  -4   4    1.32    0.79
   1   4   4   -0.44    0.66
   1   4   4    1.57    1.22
   1   4   4    1.71    0.96
  -1   4  -4   -0.27    1.42
  -2  -4  -4  167.98    4.17
   2  -4   4  172.05    4.20
   2  -4   4  170.17    3.40
  -2  -4  -4  174.47    5.47
  -2   4  -4  172.02    6.12
   2   4   4  172.66    4.29
   2   4   4  176.84    5.19
   2   4   4  173.71    3.05
   3  -4   4    2.73    1.14
   3  -4   4    3.13    1.46
  -3  -4  -4    1.83    1.66
  -3  -4  -4    2.14    1.65
   3   4   4    1.49    1.33
  -3   4  -4    2.96    2.14
   3   4   4    5.35    2.05
   4  -4   4   53.44    3.82
   4  -4   4   53.27    3.32
  -4  -4  -4   53.74    4.67
   4   4   4   49.66    3.59
   4   4   4   50.93    4.20
  -4   4  -4   64.91    6.32
   5  -4   4   -5.19    2.31
   5  -4   4   -0.03    1.78
  -5  -4  -4    0.38    3.51
  -5   4  -4    5.98    4.91
   5  -5  -4    0.73    1.96
   5  -5  -4    1.88    1.90
  -5  -5   4    0.08    5.63
  -5   5   4    4.57    4.18
   5   5  -4   -0.87    2.31
  -4  -5   4   18.34    4.31
   4  -5  -4   12.63    1.96
   4  -5  -4   16.69    2.68
  -4  -5   4   19.01    2.64
  -4   5   4   20.10    3.87
   4   5  -4   11.27    2.48
   4   5  -4   12.28    2.23
   3  -5  -4   30.98    1.94
  -3  -5   4   30.10    2.69
  -3  -5   4   32.95    3.67
   3  -5  -4   32.47    1.54
  -3   5   4   28.95    3.17
   3   5  -4   30.56    2.99
  -3   5   4   30.72    1.93
   3   5  -4   31.05    2.09
   2  -5  -4    1.57    0.69
  -2  -5   4    1.25    1.19
  -2  -5   4    2.71    0.54
   2  -5  -4    2.58    0.90
   2   5  -4    1.74    1.19
  -2   5   4    1.80    1.24
  -2   5   4    1.66    1.03
   2   5  -4    3.41    1.02
   2   5  -4    2.00    1.14
  -1  -5   4   36.17    1.80
   1  -5  -4   37.19    1.71
  -1  -5   4   38.49    1.28
  -1   5   4   37.25    2.00
   1   5  -4   38.04    2.63
  -1   5   4   38.32    1.52
  -1   5   4   38.07    1.72
   1   5  -4   36.59    1.12
   1   5  -4   42.68    2.53
   0  -5   4   10.45    1.14
   0  -5   4    9.67    1.17
   0  -5   4    8.57    0.68
   0  -5  -4   11.24    1.44
   0   5   4   10.60    1.48
   0   5  -4    8.37    2.38
   0   5   4    8.16    1.17
   1  -5   4    2.17    0.85
  -1  -5  -4    2.18    1.05
  -1  -5  -4    1.43    0.70
   1  -5   4    0.45    0.59
   1  -5   4    1.86    0.78
   1   5   4    1.78    0.72
   1   5   4    3.30    1.45
   1   5   4    2.64    1.18
  -1   5  -4    0.89    1.60
  -2  -5  -4    2.01    1.13
  -2  -5  -4    3.93    1.50
   2  -5   4    3.51    0.97
   2  -5   4    2.61    1.03
   2   5   4    2.89    0.68
   2   5   4    6.20    1.72
  -2   5  -4    2.47    1.71
   2   5   4    2.78    1.17
   3  -5   4    0.01    1.34
  -3  -5  -4    1.15    1.75
  -3  -5  -4    0.93    1.60
   3  -5   4    1.41    1.20
  -3   5  -4    0.11    2.12
   3   5   4    3.85    2.11
   3   5   4    1.48    1.46
  -4  -5  -4    1.41    2.21
   4  -5   4    0.56    1.79
   4  -5   4    1.02    1.36
   4   5   4   -0.38    1.83
  -4   5  -4    4.87    3.16
   4   5   4   -0.64    2.29
  -5  -5  -4    1.20    4.59
   5  -5   4    0.29    1.85
   5  -5   4   -1.79    2.51
  -5   5  -4    7.97    5.19
   5  -6  -4    3.75    2.11
   5  -6  -4    0.93    1.96
  -5   6   4    6.60    4.36
   5   6  -4   -1.64    2.48
  -4  -6   4   10.52    2.24
   4  -6  -4    7.12    1.83
   4  -6  -4    9.16    1.88
  -4   6   4    8.98    3.27
   4   6  -4    5.44    2.21
  -3  -6   4    3.23    1.84
   3  -6  -4    4.12    1.02
   3  -6  -4    4.12    1.26
  -3   6   4    2.72    1.80
   3   6  -4    5.13    1.65
   3   6  -4    4.07    1.72
   3   6  -4    2.54    1.60
   2  -6  -4   59.07    1.88
  -2  -6   4   58.52    2.71
  -2  -6   4   57.19    1.45
  -2   6   4   58.37    3.16
   2   6  -4   58.51    2.05
   2   6  -4   58.97    3.40
   2   6  -4   60.32    3.26
   1  -6  -4    3.18    0.77
  -1  -6   4    3.05    1.15
  -1  -6   4    4.18    0.78
   1  -6  -4    4.30    1.04
   1   6  -4    4.96    1.48
  -1   6   4    3.65    0.99
   1   6  -4    4.12    0.70
   1   6  -4    4.30    1.59
  -1   6   4    2.76    1.11
   0  -6   4  124.58    2.63
   0  -6  -4  123.32    3.20
   0  -6   4  119.22    3.03
   0   6  -4  122.12    2.63
   0   6  -4  110.67    5.35
   0   6   4  120.12    2.65
   0   6   4  122.33    3.19
   0   6  -4  118.04    5.19
   0   6   4  123.68    3.03
   1  -6   4  126.61    2.62
  -1  -6  -4  123.72    3.45
   1  -6   4  124.89    3.00
   1  -6   4  122.29    2.69
   1   6   4  123.25    2.60
   1   6   4  118.21    3.48
   1   6   4  119.58    4.06
   1   6   4  118.82    3.37
  -1   6  -4  127.59    4.91
   2  -6   4    4.73    1.19
   2  -6   4    5.28    1.07
  -2  -6  -4    4.61    1.68
  -2  -6  -4    4.56    1.25
   2   6   4    6.54    1.85
  -2   6  -4    3.75    1.95
   2   6   4    4.44    0.77
   2   6   4    4.69    1.42
  -3  -6  -4   25.49    2.85
   3  -6   4   27.25    1.96
  -3  -6  -4   24.90    2.99
   3  -6   4   27.79    2.23
   3   6   4   29.50    3.15
  -3   6  -4   25.09    3.94
   3   6   4   26.94    3.06
   4  -6   4    1.50    1.37
   4  -6   4    2.12    1.80
  -4  -6  -4    2.13    2.35
  -4  -6  -4    4.86    2.01
   4   6   4   -0.39    2.01
  -4   6  -4    3.86    3.22
   4   6   4    1.52    2.58
  -5  -6  -4   -4.36    4.63
   5  -6   4   -5.00    2.23
   5  -6   4    0.48    1.88
  -5   6  -4    6.94    5.29
   5  -7  -4    6.26    2.24
   5  -7  -4    4.50    2.14
  -5   7   4   10.67    4.91
   4  -7  -4   13.41    2.12
  -4  -7   4   17.09    2.70
  -4   7   4   18.57    3.94
   4   7  -4   24.01    4.32
   3  -7  -4    1.23    0.97
   3  -7  -4    1.45    1.20
  -3  -7   4    0.47    1.89
  -3   7   4    1.52    1.89
   3   7  -4    1.62    1.73
   3   7  -4    3.55    1.73
   3   7  -4    2.29    1.74
   2  -7  -4   16.02    1.45
   2  -7  -4   17.06    1.29
  -2  -7   4   15.82    2.19
  -2  -7   4   15.11    1.06
   2   7  -4   16.19    2.28
   2   7  -4   17.59    1.66
  -2   7   4   15.42    2.11
   2   7  -4   18.87    2.65
  -2   7   4   15.99    1.73
  -1  -7   4  134.12    2.71
   1  -7  -4  130.35    3.29
   1  -7  -4  126.19    2.85
  -1  -7   4  130.44    3.65
  -1   7   4  122.11    3.27
   1   7  -4  125.75    5.01
   1   7  -4  124.06    4.63
  -1   7   4  125.76    4.09
   1   7  -4  128.86    2.65
   0  -7   4  186.65    3.51
   0  -7  -4  185.69    4.29
   0  -7   4  182.82    4.04
   0   7   4  180.00    4.17
   0   7  -4  168.46    6.27
   0   7  -4  173.02    6.65
   0   7  -4  182.90    3.66
   0   7   4  186.28    4.45
   0   7   4  182.11    3.56
   1  -7   4  226.99    4.33
  -1  -7  -4  221.86    5.18
   1  -7   4  228.37    4.71
   1  -7   4  225.49    4.24
   1   7   4  213.93    6.20
  -1   7  -4  229.27    7.21
   1   7   4  216.38    5.07
   1   7   4  221.34    5.60
   1   7   4  227.56    4.05
  -2  -7  -4   23.09    2.46
   2  -7   4   21.70    1.70
  -2  -7  -4   23.07    2.13
   2  -7   4   23.06    1.64
  -2   7  -4   21.59    3.21
   2   7   4   24.79    2.75
   2   7   4   24.60    2.48
   2   7   4   22.99    1.25
   3  -7   4    1.58    1.47
  -3  -7  -4    3.53    2.08
  -3  -7  -4    1.26    1.69
   3  -7   4    0.65    1.29
   3   7   4    5.23    2.42
   3   7   4    1.30    1.76
  -3   7  -4    0.99    2.32
  -4  -7  -4    7.49    2.95
   4  -7   4    8.14    2.16
  -4  -7  -4    9.05    2.26
  -4   7  -4   10.23    3.71
   4   7   4    5.78    2.75
   4  -8  -4   20.03    2.29
  -4  -8   4   21.65    3.15
   4   8  -4   15.42    3.05
   4   8  -4   28.03    4.93
  -4   8   4   25.41    4.92
  -3  -8   4   12.03    2.38
   3  -8  -4   10.55    1.37
   3  -8  -4   10.44    1.67
   3   8  -4   10.92    2.43
   3   8  -4   10.77    2.34
  -3   8   4   10.13    2.53
   3   8  -4   14.44    2.34
  -2  -8   4    4.77    0.86
  -2  -8   4    5.15    1.84
   2  -8  -4    4.79    1.17
   2  -8  -4    4.22    1.02
   2   8  -4    5.12    1.31
   2   8  -4    6.85    1.99
  -2   8   4    4.47    1.56
  -2   8   4    4.53    1.34
   2   8  -4    4.97    1.72
   1  -8  -4  130.85    3.03
  -1  -8   4  141.17    2.88
   1  -8  -4  137.02    3.50
  -1  -8   4  135.18    3.75
   1   8  -4  134.63    2.85
  -1   8   4  127.40    3.49
   1   8  -4  131.91    5.32
   1   8  -4  133.95    5.26
  -1   8   4  136.70    4.30
   0  -8   4  115.58    2.66
   0  -8   4  113.15    3.11
   0  -8  -4  109.68    3.21
   0  -8  -4  116.60    2.69
   0   8   4  112.36    3.28
   0   8   4  112.82    3.20
   0   8  -4  112.14    5.50
   0   8  -4  115.49    2.75
  -1  -8  -4   29.77    2.27
   1  -8   4   30.18    1.67
   1  -8   4   29.74    1.53
   1  -8   4   30.54    1.46
   1   8   4   29.93    1.46
   1   8   4   29.93    2.33
   1   8   4   33.16    3.27
  -1   8  -4   30.59    3.49
   1   8   4   28.92    1.80
   2  -8   4  196.46    4.86
  -2  -8  -4  197.02    5.32
  -2  -8  -4  187.43    3.52
   2  -8   4  192.53    4.16
   2   8   4  187.61    6.20
  -2   8  -4  198.76    7.27
   2   8   4  182.34    5.06
  -3  -8  -4   -0.96    1.57
   3  -8   4    0.33    1.47
  -3  -8  -4    0.52    2.17
   3  -8   4   -0.47    1.31
   3   8   4    0.96    1.87
   3   8   4    4.57    2.39
  -3   8  -4    0.41    2.70
   4  -8   4   16.67    2.63
  -4  -8  -4   21.46    3.68
  -4  -8  -4   23.85    3.17
   4   8   4   22.12    3.28
   4   8   4   15.49    2.99
   4  -9  -4    4.76    1.75
  -4  -9   4    9.12    2.49
  -4   9   4    8.97    3.75
   4   9  -4    1.78    2.40
   4   9  -4    6.61    2.97
  -3  -9   4   43.88    3.42
   3  -9  -4   43.48    2.20
   3  -9  -4   41.65    2.49
   3   9  -4   46.51    4.30
  -3   9   4   45.67    4.27
   3   9  -4   43.38    4.22
   2  -9  -4    0.19    1.18
   2  -9  -4    1.18    0.96
  -2  -9   4   -0.23    1.60
  -2  -9   4    0.01    0.84
   2   9  -4    1.55    1.26
   2   9  -4    1.10    1.70
   2   9  -4    2.40    2.00
  -2   9   4   -0.15    1.29
  -2   9   4    0.55    1.31
   1  -9  -4   91.75    2.93
  -1  -9   4   92.55    2.39
  -1  -9   4   90.32    3.34
   1  -9  -4   93.26    2.51
  -1   9   4   91.42    3.04
   1   9  -4   92.68    4.90
  -1   9   4   91.12    3.47
   1   9  -4   88.07    4.57
   1   9  -4   90.63    2.32
   0  -9   4   22.34    1.93
   0  -9  -4   23.37    2.05
   0  -9  -4   22.54    1.42
   0  -9   4   24.18    1.57
   0   9   4   22.25    1.57
   0   9  -4   24.82    3.81
   0   9   4   20.92    1.90
   0   9  -4   22.77    1.41
   1  -9   4   17.40    1.32
   1  -9   4   16.26    1.58
  -1  -9  -4   16.34    2.00
  -1  -9  -4   17.54    1.28
   1  -9   4   16.26    1.39
   1   9   4   16.78    1.84
   1   9   4   23.01    3.61
  -1   9  -4   17.98    3.69
   1   9   4   17.59    2.16
   2  -9   4    2.41    1.23
  -2  -9  -4    1.33    0.72
   2  -9   4    2.92    1.23
  -2  -9  -4    2.47    2.11
  -2   9  -4    1.42    2.34
   2   9   4    4.65    2.08
   2   9   4    3.91    2.11
   2   9   4    1.81    1.06
  -3  -9  -4    1.36    2.27
   3  -9   4    3.36    1.60
   3  -9   4    2.74    1.49
   3   9   4    2.66    2.21
  -3   9  -4    1.95    3.03
   3   9   4    5.18    2.49
  -4  -9  -4    1.67    2.33
  -4  -9  -4   -2.12    2.42
   4  -9   4   -0.67    1.71
  -4   9  -4    5.32    3.85
   4   9   4   -2.26    2.37
   4   9   4   -1.63    2.74
  -4 -10   4    2.66    2.35
   4 -10  -4    1.02    1.58
   4  10  -4   -3.65    2.39
  -4  10   4    2.50    3.38
   4  10  -4    0.60    2.63
   3 -10  -4   11.16    1.80
   3 -10  -4   12.33    1.67
  -3 -10   4   12.29    2.58
  -3  10   4   13.42    2.83
   3  10  -4   12.29    2.87
   3  10  -4   11.52    2.71
   2 -10  -4   27.56    1.87
  -2 -10   4   28.08    2.95
   2 -10  -4   31.21    2.11
  -2 -10   4   29.11    1.63
   2  10  -4   39.55    4.20
  -2  10   4   29.51    2.41
  -2  10   4   29.12    2.93
   2  10  -4   30.99    3.56
   2  10  -4   29.63    1.91
  -1 -10   4   68.97    3.14
   1 -10  -4   71.05    2.69
   1 -10  -4   70.40    2.36
  -1 -10   4   70.95    2.17
  -1  10   4   69.71    2.83
   1  10  -4   70.24    5.03
  -1  10   4   70.42    3.16
   1  10  -4   70.26    2.15
   1  10  -4   70.10    4.65
   0 -10   4   58.26    2.12
   0 -10  -4   58.72    2.07
   0 -10  -4   57.98    2.77
   0 -10   4   57.79    2.59
   0  10   4   55.95    2.55
   0  10  -4   56.78    4.52
   0  10  -4   58.80    2.10
   0  10   4   55.31    2.34
  -1 -10  -4    2.27    0.86
   1 -10   4    2.01    1.10
   1 -10   4    1.65    1.13
   1 -10   4    2.03    0.95
  -1 -10  -4    2.21    1.79
  -1  10  -4    2.16    2.53
   1  10   4    5.43    2.50
   1  10   4    1.73    1.45
   1  10   4    2.55    1.72
   2 -10   4    9.58    1.52
   2 -10   4   10.11    1.53
  -2 -10  -4    9.29    2.24
  -2 -10  -4    9.00    1.17
   2  10   4   12.14    2.50
   2  10   4    9.11    1.57
  -2  10  -4    8.53    2.76
   3 -10   4   20.38    2.30
   3 -10   4   15.11    2.18
  -3 -10  -4   20.82    3.26
  -3  10  -4   23.31    5.28
   3  10   4   20.01    2.51
   3  10   4   16.29    2.89
   3  10   4   21.72    3.49
  -4 -10  -4    3.47    2.55
   4 -10   4   -0.35    1.76
  -4  10  -4    5.98    4.02
   4  10   4   -1.88    2.72
   4  10   4   -2.89    2.60
  -4 -11   4    5.80    2.61
   4 -11  -4    2.45    1.66
   4  11  -4   -1.71    2.85
   4  11  -4   -2.37    2.83
  -4  11   4    5.14    3.70
   3 -11  -4    5.57    1.61
  -3 -11   4    6.65    2.53
   3 -11  -4    3.24    1.32
   3  11  -4    4.17    2.63
  -3  11   4    7.56    2.52
   3  11  -4    3.05    2.32
  -2 -11   4   21.67    1.63
  -2 -11   4   20.77    3.01
   2 -11  -4   23.47    1.92
   2 -11  -4   22.83    2.14
  -2  11   4   24.51    2.79
   2  11  -4   28.87    4.70
   2  11  -4   23.13    1.90
   2  11  -4   23.43    3.56
  -2  11   4   23.01    2.45
  -1 -11   4   23.87    1.62
  -1 -11   4   24.27    2.65
   1 -11  -4   24.98    2.14
   1  11  -4   26.74    5.25
   1  11  -4   28.26    4.04
  -1  11   4   22.34    2.16
  -1  11   4   23.24    2.31
   1  11  -4   22.67    1.55
   0 -11  -4   45.80    1.91
   0 -11  -4   49.85    2.82
   0 -11   4   46.80    2.10
   0 -11   4   49.19    2.50
   0  11  -4   48.35    4.94
   0  11  -4   47.01    1.99
   0  11   4   47.61    2.36
   0  11   4   46.29    2.59
  -1 -11  -4  141.33    4.65
   1 -11   4  139.51    3.77
   1 -11   4  142.32    3.65
   1 -11   4  143.87    3.64
  -1 -11  -4  141.88    3.28
   1  11   4  125.93    4.62
   1  11   4  134.27    4.19
   1  11   4  138.44    6.92
  -1  11  -4  145.61    7.00
  -2 -11  -4   -0.44    0.83
  -2 -11  -4    0.79    2.14
   2 -11   4    0.64    1.32
   2 -11   4    0.40    1.16
  -2  11  -4   -1.34    2.60
   2  11   4   -0.82    1.30
   2  11   4    4.53    2.54
   2  11   4    1.63    2.20
   3 -11   4   14.71    1.95
   3 -11   4   17.07    2.24
  -3 -11  -4   18.95    3.00
   3  11   4   20.73    3.07
   3  11   4   16.31    3.14
  -3  11  -4   25.09    4.70
  -4 -11  -4   14.03    3.05
   4 -11   4   11.18    2.45
   4  11   4    7.06    3.28
  -4 -12   4   11.19    2.92
   4 -12  -4    8.26    2.05
  -4  12   4   17.18    4.90
   4  12  -4    4.63    3.12
   3 -12  -4    0.34    1.35
  -3 -12   4    1.28    2.41
   3 -12  -4   -0.76    1.21
   3  12  -4   -0.28    2.63
   3  12  -4   -1.27    2.34
  -3  12   4    3.33    2.36
  -2 -12   4    5.32    2.23
   2 -12  -4    8.16    1.52
   2 -12  -4    6.41    1.77
  -2 -12   4    7.04    1.25
  -2  12   4    8.16    2.13
  -2  12   4    7.23    1.87
   2  12  -4    6.83    2.80
   2  12  -4    8.88    1.54
   2  12  -4    8.42    3.03
   1 -12  -4   27.02    2.42
  -1 -12   4   27.14    2.58
   1 -12  -4   28.77    2.01
  -1 -12   4   25.71    1.79
   1  12  -4   30.25    6.10
   1  12  -4   27.10    1.77
  -1  12   4   28.35    2.57
   1  12  -4   35.29    4.87
  -1  12   4   25.04    2.36
   0 -12   4   11.99    1.68
   0 -12  -4   12.95    1.56
   0 -12  -4   16.62    2.32
   0 -12   4   12.64    1.96
   0  12  -4   11.85    1.59
   0  12  -4   12.77    3.25
   0  12   4   13.33    1.99
   0  12   4   15.92    2.14
  -1 -12  -4   50.15    3.48
  -1 -12  -4   50.58    2.14
   1 -12   4   50.46    2.30
   1 -12   4   47.37    2.26
   1 -12   4   48.92    2.44
   1  12   4   55.89    6.48
   1  12   4   48.46    2.96
  -1  12  -4   39.99    5.92
   1  12   4   42.71    3.05
   2 -12   4   41.54    2.53
  -2 -12  -4   39.45    1.90
   2 -12   4   41.63    2.47
  -2 -12  -4   40.12    3.74
   2  12   4   46.88    5.29
   2  12   4   37.64    3.32
  -2  12  -4   40.13    5.37
   3 -12   4    1.46    1.61
   3 -12   4   -1.62    1.44
  -3 -12  -4    2.59    2.70
   3  12   4    1.10    2.64
  -3  12  -4    6.79    4.05
   3  12   4    4.64    2.55
  -4 -12  -4   25.51    4.18
   4 -12   4   16.69    2.74
   4 -13  -4   16.73    2.62
  -4 -13   4   20.95    3.46
   4  13  -4   11.37    3.86
  -3 -13   4   30.85    3.96
   3 -13  -4   25.68    2.28
   3 -13  -4   24.73    2.36
   3  13  -4   23.52    3.90
   3  13  -4   25.25    4.40
  -3  13   4   33.80    4.24
   2 -13  -4   38.65    2.40
  -2 -13   4   37.98    3.69
   2 -13  -4   36.77    2.70
  -2 -13   4   36.44    2.04
   2  13  -4   44.51    5.58
   2  13  -4   39.25    4.88
  -2  13   4   42.84    3.82
   2  13  -4   41.79    2.29
  -2  13   4   35.50    2.90
  -1 -13   4   17.79    1.93
  -1 -13   4   20.44    2.93
   1 -13  -4   19.95    1.97
   1 -13  -4   21.32    2.70
  -1  13   4   21.90    2.58
   1  13  -4   25.65    4.67
   1  13  -4   19.74    4.42
   1  13  -4   17.51    1.67
  -1  13   4   17.88    2.33
   0 -13  -4    1.86    2.05
   0 -13   4    0.40    1.77
   0 -13  -4    1.73    1.15
   0 -13   4    1.34    1.16
   0  13   4    1.14    1.74
   0  13  -4    0.71    1.26
   0  13   4    1.66    1.37
   1 -13   4   10.32    1.46
  -1 -13  -4   10.71    1.42
   1 -13   4   10.82    1.76
  -1 -13  -4   12.00    2.54
   1 -13   4   12.89    1.72
   1  13   4   10.77    2.29
  -1  13  -4   11.19    4.19
   1  13   4    9.50    4.00
   2 -13   4   27.79    2.42
  -2 -13  -4   24.15    1.71
  -2 -13  -4   26.92    3.66
   2 -13   4   26.78    2.18
  -2  13  -4   29.15    5.49
   2  13   4   28.95    5.39
   2  13   4   26.55    3.16
   3 -13   4    6.14    1.91
  -3 -13  -4   14.37    3.28
   3 -13   4   10.77    2.16
  -3  13  -4   17.49    5.17
   3  13   4   11.24    2.73
   3  13   4    6.11    3.01
   4 -13   4    6.02    2.25
  -4 -13  -4    9.61    3.23
  -4  13  -4   16.74    5.27
  -4 -14   4   14.72    3.38
   4 -14  -4    2.44    2.07
   4 -14  -4    5.20    1.99
   4  14  -4   -1.56    3.31
   3 -14  -4   27.41    2.52
   3 -14  -4   28.33    2.43
  -3 -14   4   32.88    4.11
   3  14  -4   22.90    4.82
   3  14  -4   24.43    4.58
  -2 -14   4   -1.74    1.18
   2 -14  -4    0.04    1.29
  -2 -14   4    1.65    2.44
   2 -14  -4   -0.58    1.70
   2  14  -4    1.28    2.99
  -2  14   4    0.31    1.80
   2  14  -4    0.43    2.97
  -2  14   4    2.81    2.01
  -1 -14   4   47.75    2.51
   1 -14  -4   49.99    2.61
   1 -14  -4   48.24    3.33
  -1 -14   4   45.66    3.26
  -1  14   4   45.46    3.01
  -1  14   4   48.71    3.31
   1  14  -4   45.00    2.28
   1  14  -4   42.27    7.85
   1  14  -4   44.99    5.58
   0 -14  -4   21.07    3.10
   0 -14   4   20.13    2.62
   0 -14   4   20.07    2.09
   0 -14  -4   22.21    2.03
   0  14   4   18.64    2.49
   0  14  -4   23.35    2.06
  -1 -14  -4    0.69    1.13
   1 -14   4    1.99    1.23
   1 -14   4   -0.01    1.41
   1 -14   4   -0.24    1.63
  -1 -14  -4    2.24    2.62
  -1  14  -4    0.87    4.11
   1  14   4    1.26    2.07
   1  14   4    2.43    4.48
  -2 -14  -4   11.84    2.74
   2 -14   4   10.94    1.94
   2 -14   4   14.35    2.08
  -2 -14  -4   10.69    1.42
  -2  14  -4   17.76    4.03
   2  14   4   15.39    2.60
   2  14   4    9.17    3.06
   3 -14   4   21.71    2.64
  -3 -14  -4   30.65    4.60
   3 -14   4   27.55    2.72
   3  14   4   32.28    3.61
   3  14   4   17.93    3.78
  -4 -14  -4    5.26    3.41
   4 -14   4    1.70    2.08
  -4  14  -4   11.08    5.09
   3 -15  -4   -0.82    1.42
  -3 -15   4    1.02    2.78
   3 -15  -4   -1.48    1.44
  -3  15   4    4.12    2.62
   3  15  -4   -2.11    3.22
  -2 -15   4    6.64    1.51
   2 -15  -4    7.63    1.66
  -2 -15   4   11.14    2.92
   2  15  -4    7.78    3.59
  -2  15   4   10.62    2.33
   2  15  -4    3.89    3.40
   1 -15  -4   17.87    2.82
  -1 -15   4   16.18    2.03
   1 -15  -4   17.80    2.18
  -1 -15   4   21.74    3.05
   1  15  -4   19.01    4.11
  -1  15   4   17.09    2.59
  -1  15   4   22.80    2.87
   1  15  -4   18.73    1.87
   1  15  -4   14.44    4.98
   0 -15  -4    0.78    2.39
   1 -15   4   31.39    2.15
   1 -15   4   32.42    2.55
   1 -15   4   34.30    2.63
  -1 -15  -4   31.21    2.16
  -1 -15  -4   34.24    3.96
   1  15   4   42.00    8.40
   1  15   4   32.92    3.15
  -1  15  -4   43.90    6.08
  -2 -15  -4   -0.48    1.12
  -2 -15  -4    2.05    2.82
   2 -15   4    0.95    1.42
   2 -15   4   -0.73    1.59
   2  15   4    2.82    2.21
  -2  15  -4    7.11    3.67
   2  15   4    2.55    3.36
   3 -15   4    3.16    1.80
  -3 -15  -4    3.10    3.35
   3 -15   4   -2.81    1.79
   3  15   4    4.19    2.62
   3  15   4   -4.00    3.31
  -3 -16   4    7.51    3.15
   3 -16  -4    0.03    1.59
   3 -16  -4    3.48    1.78
  -3  16   4    7.71    3.00
   2 -16  -4    5.05    1.69
  -2 -16   4    6.10    2.77
  -2 -16   4    0.74    1.47
   2  16  -4    6.39    3.76
  -2  16   4    5.81    2.21
   2  16  -4   -1.51    3.51
   1 -16  -4    4.93    1.52
  -1 -16   4    4.91    1.63
   1 -16  -4    6.86    2.21
  -1 -16   4    6.93    2.54
   1  16  -4    3.60    3.41
   1  16  -4   11.36    4.98
  -1  16   4    8.69    2.23
   1  16  -4    6.87    1.57
   0 -16   4    3.81    2.20
   0 -16  -4    3.87    1.52
   0 -16  -4    4.20    2.48
   0 -16   4    2.92    1.59
   0  16  -4    2.22    1.54
   0  16   4    4.15    2.08
  -1 -16  -4    6.59    2.89
   1 -16   4    4.92    1.69
   1 -16   4    4.26    1.47
  -1 -16  -4    4.89    1.47
   1 -16   4    7.25    1.94
  -1  16  -4   10.81    5.00
   1  16   4    4.89    2.27
   1  16   4   13.15    4.95
   2 -16   4    2.98    1.77
   2 -16   4    5.22    1.69
  -2 -16  -4    5.60    3.14
  -2 -16  -4    3.80    1.37
  -2  16  -4   10.89    4.31
   2  16   4    6.65    2.38
   2  16   4    7.44    4.01
   3 -16   4    0.79    1.70
  -3 -16  -4    0.55    3.41
   3  16   4    3.51    2.54
   3 -17  -4    9.90    2.22
  -3 -17   4   14.28    3.50
   3 -17  -4    5.31    1.91
  -2 -17   4   39.21    4.47
  -2 -17   4   25.87    2.38
   2 -17  -4   31.88    2.83
   2  17  -4   36.40    6.72
   2  17  -4   20.11    4.90
  -2  17   4   35.13    3.30
  -1 -17   4    1.67    2.40
  -1 -17   4   -1.30    1.48
   1 -17  -4    0.03    1.43
   1 -17  -4   -0.20    2.12
   1  17  -4   -0.65    3.18
   1  17  -4    2.76    4.65
   1  17  -4    1.13    1.37
  -1  17   4   -1.50    1.89
   0 -17  -4   18.00    3.03
   0 -17   4   19.76    3.19
   0 -17  -4   16.22    2.25
   0 -17   4   16.30    2.12
   0  17  -4   17.05    2.19
   0  17   4   19.03    2.87
  -1 -17  -4    4.93    1.51
   1 -17   4    5.24    1.83
  -1 -17  -4    5.60    2.87
   1 -17   4    5.61    1.57
   1 -17   4    8.30    1.99
  -1  17  -4   12.26    5.48
   1  17   4    7.35    2.48
   1  17   4    7.56    4.85
  -2 -17  -4    7.51    1.62
  -2 -17  -4    8.57    3.32
   2 -17   4   10.41    2.00
   2 -17   4    7.42    2.11
   2  17   4   11.72    2.62
   2  17   4    9.37    4.36
   3 -17   4    5.40    2.11
  -3 -17  -4    8.23    3.84
   3  17   4    8.21    2.68
  -3 -18   4   28.52    4.88
   3 -18  -4   16.91    2.59
   3 -18  -4   13.88    2.44
   2 -18  -4    3.44    1.77
  -2 -18   4    8.88    3.11
   2  18  -4    3.79    4.42
  -2  18   4    8.04    2.49
   1 -18  -4    0.40    2.32
  -1 -18   4    2.30    2.58
   1 -18  -4    0.59    1.61
  -1 -18   4   -1.43    1.62
  -1  18   4    4.04    2.22
   1  18  -4   -4.95    3.49
   1  18  -4    8.72    4.75
   0 -18   4   -0.17    1.64
   0 -18  -4   -1.03    1.48
   0 -18   4    3.37    2.22
   0 -18  -4    1.20    2.55
   0  18  -4   -6.44    7.99
   0  18   4    2.92    2.13
   0  18  -4    1.73    1.63
   1 -18   4   16.79    2.02
  -1 -18  -4   19.24    3.50
  -1 -18  -4   17.55    2.11
   1 -18   4   15.03    2.25
   1  18   4   23.25    3.30
  -2 -18  -4    6.87    1.82
  -2 -18  -4   11.78    3.68
   2 -18   4    6.77    2.09
   2 -18   4   11.41    2.12
   2  18   4   13.46    2.67
   2  18   4    7.03    4.57
   3 -18   4   11.84    2.57
   3 -18   4   17.70    2.73
  -3 -18  -4   29.03    4.72
  -2 -19   4    8.72    3.21
   2 -19  -4    3.04    1.87
  -2  19   4    5.41    2.42
   2  19  -4    3.91    4.62
  -1 -19   4   16.41    3.21
   1 -19  -4   12.03    2.09
   1 -19  -4   14.57    2.94
  -1 -19   4    9.90    2.13
   1  19  -4   10.20    3.98
  -1  19   4   17.58    2.88
   0 -19   4    3.52    1.88
   0 -19   4    8.51    2.60
   0 -19  -4    5.79    2.95
   0 -19  -4    6.12    1.90
   0  19   4    9.37    2.50
   0  19  -4    7.88    1.91
  -1 -19  -4    8.34    3.19
   1 -19   4    1.58    1.81
  -1 -19  -4    2.90    1.70
   1 -19   4    4.94    1.74
   1  19   4    8.44    2.54
   2 -19   4    1.01    1.97
  -2 -19  -4    6.43    3.74
   2 -19   4    4.65    1.82
   2  19   4    1.85    4.94
   2  19   4    7.40    2.42
   2 -20  -4   -1.17    1.81
  -2 -20   4    4.13    3.20
   2  20  -4   -0.71    5.14
  -2  20   4    3.28    2.32
  -1 -20   4    2.86    1.99
   1 -20  -4    5.92    1.97
  -1 -20   4   15.21    3.12
   1 -20  -4   10.13    2.89
  -1  20   4   10.30    2.73
   0 -20  -4    1.06    2.83
   0 -20   4   -3.74    1.77
   0 -20   4    3.91    2.45
   0 -20  -4   -2.65    1.55
   0  20  -4    3.60    1.75
   0  20   4    2.21    2.28
  -1 -20  -4    4.28    3.18
  -1 -20  -4    3.25    1.78
   1 -20   4    0.08    2.02
   1 -20   4    4.32    1.73
   1  20   4    6.02    2.56
  -1  20  -4   12.69    5.06
  -2 -20  -4    0.50    3.51
   2 -20   4    1.00    1.63
   2  20   4   -3.04    5.25
   2  20   4    3.79    2.49
   1 -21  -4   -0.22    2.65
   1 -21  -4   -2.39    1.79
  -1 -21   4    5.24    2.94
  -1  21   4    4.41    2.52
   0 -21   4   15.09    2.91
   0 -21  -4   13.30    3.43
   0 -21  -4   10.86    2.27
   0  21   4   11.88    2.80
   0  21  -4   14.66    2.43
  -1 -21  -4    5.92    3.41
   1 -21   4    3.00    1.64
   1 -21   4   -0.87    2.05
   1  21   4    6.05    2.55
  -1 -22   4    5.48    3.10
   1 -22  -4   -2.62    1.97
  -1  22   4    2.27    2.57
   0 -22  -4    3.11    3.29
   0 -22  -4   -1.43    1.94
   0 -22   4    5.96    2.80
   0  22   4    4.39    2.52
  -5   0   5   22.43    5.49
   5   0  -5   11.55    2.75
   4   0  -5   -0.36    1.38
   4   0  -5   -1.16    1.29
  -4   0   5   -0.49    2.33
   3   0  -5  369.82    9.69
   3   0  -5  371.21    7.20
  -3   0   5  365.09    7.47
  -3   0   5  362.46   11.08
   2   0  -5   -0.23    0.68
  -2   0   5   -0.20    1.09
  -2   0   5   -1.10    0.91
  -2   0   5   -0.19    0.53
   2   0  -5    0.05    0.57
  -1   0   5  167.21    2.96
  -1   0   5  171.05    5.01
  -1   0   5  163.44    3.61
  -1   0   5  167.01    3.12
   1   0  -5  171.89    4.14
   0   0   5    0.07    0.74
   0   0   5    1.80    0.88
   0   0   5    0.59    0.87
  -1   0  -5   85.37    3.39
   1   0   5   90.90    2.04
   1   0   5   89.98    2.54
  -1   0  -5   88.61    2.22
   1   0   5   92.78    2.48
  -2   0  -5   -0.20    1.23
  -2   0  -5   -0.04    0.86
   2   0   5   -0.13    0.66
   2   0   5    1.18    1.18
   2   0   5    0.37    0.74
  -3   0  -5  220.32    4.69
   3   0   5  223.69    6.73
  -3   0  -5  225.78    7.88
   3   0   5  224.23    4.00
   3   0   5  227.77    5.70
   4   0   5   -2.55    2.00
   4   0   5   -0.45    1.33
  -4   0  -5    0.46    2.95
   5   0   5   17.41    3.07
   5   0   5   17.11    3.48
  -5  -1   5   17.21    5.54
   5  -1  -5    9.52    2.38
   5  -1  -5    7.06    2.32
  -5   1   5   17.94    5.15
   5   1  -5    7.79    2.56
  -4  -1   5   11.83    1.83
   4  -1  -5   12.57    1.88
  -4  -1   5    9.85    3.10
   4  -1  -5    9.36    1.95
  -4   1   5   12.25    3.10
   4   1  -5   12.33    1.88
   4   1  -5    9.14    2.07
  -3  -1   5   11.73    2.70
   3  -1  -5   11.33    1.95
   3  -1  -5   11.93    0.86
   3  -1  -5   11.97    1.36
  -3  -1   5   12.07    1.68
   3   1  -5   12.50    2.05
  -3   1   5   11.94    2.63
  -3   1   5   11.93    1.54
   3   1  -5   13.01    1.39
   2  -1  -5    0.09    0.67
  -2  -1   5    0.09    0.50
  -2  -1   5    0.04    1.20
  -2  -1   5    0.34    0.94
   2  -1  -5    0.47    0.61
   2   1  -5    0.72    0.59
   2   1  -5    0.42    0.77
  -2   1   5    0.26    1.13
  -2   1   5    0.53    0.58
  -2   1   5   -0.03    0.88
  -1  -1   5   86.01    1.89
  -1  -1   5   85.65    2.37
   1   1  -5   85.06    3.24
   1   1  -5   88.96    2.61
  -1   1   5   83.88    2.00
  -1   1   5   85.64    2.39
  -1   1   5   87.75    1.93
  -1   1   5   87.53    3.15
   0  -1   5   89.80    1.95
   0  -1   5   89.86    2.28
   0  -1  -5   93.02    3.09
   0  -1   5   86.27    1.98
   0   1  -5   91.71    3.97
   0   1   5   92.29    2.40
   0   1   5   89.00    2.36
   0   1   5   88.23    1.97
   1  -1   5    1.80    0.85
   1  -1   5    0.36    0.78
  -1  -1  -5    0.46    0.84
  -1  -1  -5   -1.12    1.05
   1   1   5    0.07    0.74
  -1   1  -5   -1.45    1.33
   1   1   5    2.61    1.17
  -1   1  -5   -0.63    0.66
   1   1   5    1.13    0.56
   2  -1   5  112.27    3.23
   2  -1   5  109.69    3.64
   2  -1   5  107.23    2.42
  -2  -1  -5  106.64    2.80
  -2  -1  -5  111.30    4.29
   2   1   5  109.64    3.63
   2   1   5  112.62    2.34
  -2   1  -5  108.64    4.44
   2   1   5  108.38    3.21
  -2   1  -5  105.55    2.48
   3  -1   5    3.93    1.25
   3  -1   5    5.95    1.09
   3  -1   5    5.28    1.64
  -3  -1  -5    5.97    2.01
  -3  -1  -5    6.93    1.42
   3   1   5    7.02    0.99
   3   1   5    4.76    1.32
  -3   1  -5    3.92    2.00
   3   1   5    9.17    1.97
  -4  -1  -5    4.56    2.74
   4  -1   5    1.95    1.54
   4  -1   5    1.78    2.05
   4   1   5    2.37    1.59
   4   1   5    0.48    2.26
  -4   1  -5    6.16    3.45
   5  -1   5    3.45    2.92
   5  -1   5    8.13    2.55
   5   1   5    5.45    2.63
   5   1   5    2.61    3.09
   5  -2  -5    7.34    2.31
   5  -2  -5    6.21    2.16
  -5  -2   5   12.75    5.32
   5   2  -5    5.84    2.63
  -5   2   5   15.89    4.86
   4  -2  -5    3.24    1.44
  -4  -2   5    3.06    1.60
  -4  -2   5    2.21    2.74
   4  -2  -5    3.26    1.56
   4   2  -5    2.48    1.67
  -4   2   5    1.41    2.42
   4   2  -5    1.24    1.50
  -3  -2   5    0.32    1.38
   3  -2  -5    0.22    0.60
   3  -2  -5    0.45    0.90
   3  -2  -5    0.04    0.93
  -3  -2   5    0.18    1.71
   3   2  -5    0.80    1.19
   3   2  -5    0.94    1.02
  -3   2   5    0.58    1.09
  -3   2   5    0.02    1.53
  -2  -2   5    0.10    1.02
  -2  -2   5    0.26    1.26
  -2  -2   5    1.11    0.53
   2  -2  -5    0.53    0.66
  -2   2   5    0.05    1.09
  -2   2   5    0.80    0.89
   2   2  -5    0.51    0.83
   2   2  -5    0.87    0.60
  -2   2   5    0.71    0.63
  -1  -2   5   -0.55    0.99
  -1  -2   5   -0.21    0.64
   1   2  -5    0.09    1.01
  -1   2   5    0.24    0.88
   1   2  -5    0.59    0.29
   1   2  -5    1.17    0.72
  -1   2   5    0.05    0.89
  -1   2   5   -0.06    0.75
  -1   2   5   -0.28    0.70
   0  -2  -5  157.63    4.02
   0  -2   5  153.81    2.79
   0  -2   5  151.76    3.23
   0  -2   5  148.03    2.78
   0   2   5  153.43    2.89
   0   2   5  145.19    3.33
   0   2  -5  148.43    5.36
   0   2   5  154.48    3.55
  -1  -2  -5    7.02    1.09
  -1  -2  -5    4.59    1.08
   1  -2   5    6.61    0.89
   1  -2   5    5.82    0.92
   1  -2   5    7.10    1.09
   1   2   5    6.17    0.90
   1   2   5    7.40    1.18
   1   2   5    9.76    1.56
  -1   2  -5    4.41    1.62
  -2  -2  -5   72.81    3.32
   2  -2   5   66.73    2.42
   2  -2   5   68.33    2.00
  -2  -2  -5   67.96    2.33
   2   2   5   71.47    2.91
   2   2   5   71.34    1.82
   2   2   5   72.49    2.67
  -2   2  -5   68.49    3.63
  -2   2  -5   65.86    1.69
  -3  -2  -5    0.29    1.39
   3  -2   5    0.58    1.46
   3  -2   5    0.77    1.04
  -3  -2  -5   -0.04    1.65
   3  -2   5    0.23    0.97
   3   2   5    1.15    1.79
   3   2   5   -0.36    1.07
  -3   2  -5    0.04    1.92
   4  -2   5   -0.33    1.32
   4  -2   5   -2.69    1.79
  -4  -2  -5    0.94    2.60
   4   2   5   -0.52    1.57
   4   2   5   -2.30    2.17
  -4   2  -5    2.25    3.11
   5  -2   5   -1.87    2.73
  -5  -2  -5    3.46    3.70
   5  -2   5    0.02    1.94
   5   2   5   -1.88    2.23
  -5   2  -5   10.46    5.00
   5  -3  -5   16.08    2.87
   5  -3  -5   18.90    2.66
  -5  -3   5   26.12    6.54
  -5   3   5   27.09    5.57
   5   3  -5   10.55    2.84
   4  -3  -5   31.66    3.20
  -4  -3   5   31.49    2.65
   4  -3  -5   28.23    2.28
  -4  -3   5   31.34    5.16
  -4   3   5   33.52    4.71
   4   3  -5   24.78    2.38
   4   3  -5   28.29    3.43
  -3  -3   5   -0.28    1.43
   3  -3  -5    0.38    0.66
  -3  -3   5    0.02    1.69
   3  -3  -5    0.33    0.96
   3  -3  -5   -0.11    0.95
   3   3  -5   -0.21    1.21
   3   3  -5    0.29    1.05
  -3   3   5    0.10    1.11
  -3   3   5   -0.44    1.53
  -2  -3   5   29.86    2.64
  -2  -3   5   29.66    1.02
   2  -3  -5   30.97    1.45
  -2  -3   5   30.17    1.89
   2   3  -5   32.43    2.22
   2   3  -5   31.06    1.25
  -2   3   5   30.09    2.39
  -2   3   5   31.78    1.63
  -1  -3   5  268.82    5.53
  -1  -3   5  267.81    4.30
   1   3  -5  271.47    7.52
  -1   3   5  272.31    5.15
  -1   3   5  276.34    4.57
   1   3  -5  286.00    6.48
  -1   3   5  277.54    5.52
  -1   3   5  280.63    7.12
   0  -3   5   62.27    1.91
   0  -3   5   63.81    1.75
   0  -3  -5   69.93    2.00
   0  -3   5   64.50    1.46
   0  -3  -5   60.38    2.13
   0   3   5   62.47    1.80
   0   3  -5   58.81    3.47
   0   3   5   58.71    2.19
   0   3  -5   71.59    4.09
   1  -3   5   85.12    2.29
   1  -3   5   86.59    2.12
  -1  -3  -5   82.72    2.45
  -1  -3  -5   83.12    2.74
   1  -3   5   85.73    1.98
  -1   3  -5   84.82    3.75
   1   3   5   82.68    2.02
   1   3   5   84.31    2.69
   1   3   5   83.75    2.71
  -2  -3  -5  115.51    4.23
   2  -3   5  108.20    3.16
   2  -3   5  111.60    2.62
  -2  -3  -5  113.36    3.20
   2   3   5  115.31    3.48
  -2   3  -5  111.41    4.75
   2   3   5  116.72    2.41
   2   3   5  119.28    3.91
   3  -3   5   -0.45    0.91
   3  -3   5    0.44    1.09
  -3  -3  -5   -1.14    1.51
   3  -3   5    2.11    1.51
  -3  -3  -5    1.41    1.56
   3   3   5    0.67    1.84
  -3   3  -5   -1.41    2.00
   3   3   5    0.22    1.21
  -4  -3  -5    8.58    2.93
   4  -3   5    6.84    1.84
   4  -3   5    6.52    2.30
  -4   3  -5   12.30    3.84
   4   3   5    5.08    2.01
   4   3   5    5.82    2.42
  -5  -3  -5   19.64    4.59
   5  -3   5   14.28    2.84
   5  -3   5   12.78    3.17
   5   3   5    3.42    3.47
   5   3   5    8.75    3.00
   5  -4  -5    2.86    1.99
  -5  -4   5   -0.39    5.43
   5  -4  -5    0.93    1.83
  -5   4   5    6.74    4.30
   5   4  -5   -1.35    2.27
   4  -4  -5    1.63    1.38
  -4  -4   5    0.69    1.71
   4  -4  -5    0.78    1.38
  -4  -4   5    0.28    2.97
   4   4  -5    0.99    1.63
  -4   4   5    2.63    2.62
   3  -4  -5  220.02    3.99
  -3  -4   5  210.00    5.41
   3  -4  -5  209.53    5.09
  -3  -4   5  215.09    8.00
   3   4  -5  221.19    6.97
   3   4  -5  213.11    4.70
  -3   4   5  210.18    7.62
  -3   4   5  208.01    4.86
  -2  -4   5    3.33    0.58
  -2  -4   5    2.57    1.30
   2  -4  -5    2.57    0.68
   2  -4  -5    3.43    0.87
  -2   4   5    2.05    1.20
   2   4  -5    1.20    1.12
   2   4  -5    3.30    0.83
  -2   4   5    3.65    1.09
   2   4  -5    2.49    1.11
  -1  -4   5  305.88    6.15
  -1  -4   5  311.62    4.83
   1   4  -5  313.67    7.23
   1   4  -5  309.08    8.44
  -1   4   5  305.32    5.09
  -1   4   5  311.61    6.13
  -1   4   5  308.56    7.81
  -1   4   5  301.20    5.80
   0  -4  -5    1.85    1.08
   0  -4   5    2.33    0.84
   0  -4   5    1.35    0.47
   0  -4   5    0.79    0.90
   0   4   5    1.05    0.85
   0   4  -5   -0.25    1.88
   0   4  -5    4.82    2.23
   0   4   5   -0.07    1.33
  -1  -4  -5   13.98    1.48
   1  -4   5   14.58    1.28
  -1  -4  -5   13.32    1.18
   1  -4   5   14.60    1.10
   1  -4   5   14.79    0.93
   1   4   5   15.12    1.85
   1   4   5   16.93    1.80
   1   4   5   14.31    1.09
  -1   4  -5   13.99    2.59
  -2  -4  -5   11.41    1.59
  -2  -4  -5    9.21    1.65
   2  -4   5   10.52    1.24
   2  -4   5   10.60    1.37
   2   4   5   12.15    1.78
   2   4   5   10.57    1.08
   2   4   5   13.24    1.99
  -2   4  -5   10.14    2.10
  -3  -4  -5   97.10    4.69
  -3  -4  -5   95.31    3.54
   3  -4   5  101.62    2.79
   3  -4   5  100.79    3.65
   3   4   5  102.26    4.46
   3   4   5   99.33    3.90
  -3   4  -5  100.74    5.62
  -4  -4  -5    3.93    2.36
   4  -4   5    4.20    1.62
   4  -4   5    3.70    2.11
  -4   4  -5    5.28    3.28
   4   4   5    2.69    2.43
   4   4   5    2.55    1.97
   5  -4   5   21.72    3.65
   5  -4   5   22.54    3.81
  -5  -4  -5   27.39    6.00
   5   4   5   11.21    3.71
   5   4   5   14.58    3.45
   5  -5  -5    5.99    2.25
   5  -5  -5    5.18    2.08
  -5  -5   5   -0.26    5.92
  -5   5   5    6.69    4.41
   5   5  -5    0.89    2.42
   4  -5  -5    1.74    1.40
  -4  -5   5    0.94    3.31
   4  -5  -5    1.91    1.40
  -4  -5   5    2.16    1.78
  -4   5   5    2.97    2.71
   4   5  -5    0.39    1.78
   3  -5  -5   35.29    1.61
   3  -5  -5   33.77    1.98
  -3  -5   5   32.93    2.58
   3   5  -5   35.78    2.93
  -3   5   5   31.34    3.32
  -3   5   5   30.88    2.08
   3   5  -5   32.32    2.06
  -2  -5   5   26.04    1.04
   2  -5  -5   27.04    1.26
  -2  -5   5   22.79    1.99
  -2   5   5   25.96    1.77
   2   5  -5   27.52    1.41
   2   5  -5   27.30    2.36
   2   5  -5   25.32    2.43
  -2   5   5   26.07    2.26
  -2   5   5   26.29    1.74
  -1  -5   5    7.48    1.30
   1  -5  -5    7.47    1.17
  -1  -5   5    8.60    1.02
  -1   5   5    7.02    1.25
   1   5  -5   10.73    2.15
  -1   5   5    7.66    1.16
   1   5  -5    7.23    0.52
   1   5  -5   11.62    2.03
  -1   5   5    7.69    0.95
   0  -5   5   65.35    1.88
   0  -5   5   60.61    2.02
   0  -5   5   60.97    1.53
   0  -5  -5   64.33    2.29
   0   5  -5   61.53    4.29
   0   5   5   57.06    2.30
   0   5  -5   64.82    4.44
   0   5   5   61.09    1.80
   1  -5   5   14.05    1.30
   1  -5   5   13.36    1.08
  -1  -5  -5   13.28    1.63
  -1  -5  -5   12.59    1.10
   1  -5   5   14.22    0.97
   1   5   5   12.15    1.73
   1   5   5   12.13    1.11
   1   5   5   15.85    1.96
  -1   5  -5   14.17    2.81
   2  -5   5    9.29    1.18
  -2  -5  -5   11.57    1.68
  -2  -5  -5    9.02    1.68
   2  -5   5   10.01    1.39
   2   5   5    9.06    1.85
   2   5   5   13.27    2.15
   2   5   5    9.64    1.10
  -2   5  -5    9.50    2.24
  -3  -5  -5   10.68    2.01
   3  -5   5   10.23    1.47
  -3  -5  -5    9.35    2.11
   3  -5   5   11.32    1.92
   3   5   5    7.83    1.81
  -3   5  -5   11.15    2.86
   3   5   5   11.08    2.36
   4  -5   5   -1.80    1.71
  -4  -5  -5    0.77    2.10
   4  -5   5    1.31    1.38
   4   5   5   -1.81    1.82
  -4   5  -5    2.94    3.22
   4   5   5    0.47    2.43
  -5  -5  -5    1.05    3.67
   5  -5   5   -5.07    2.51
   5  -5   5    0.16    1.86
  -5   5  -5   12.03    5.68
   5  -6  -5    6.77    2.18
   5  -6  -5    6.82    2.30
  -5   6   5   10.48    4.74
   5   6  -5    1.59    2.63
   4  -6  -5    1.12    1.41
   4  -6  -5    1.81    1.36
  -4  -6   5    1.29    1.88
  -4   6   5    2.01    2.82
   4   6  -5   -1.20    1.83
   3  -6  -5    0.94    1.12
  -3  -6   5   -0.48    1.74
   3  -6  -5    1.22    0.92
  -3   6   5    0.15    1.34
   3   6  -5    3.40    1.54
  -3   6   5   -0.19    1.65
   3   6  -5    0.60    1.61
   3   6  -5    1.73    1.64
  -2  -6   5   53.88    2.68
   2  -6  -5   53.59    1.79
  -2  -6   5   52.08    1.46
  -2   6   5   53.51    2.22
   2   6  -5   55.14    3.17
  -2   6   5   51.98    2.30
  -2   6   5   53.00    3.02
   2   6  -5   52.96    3.28
   2   6  -5   52.19    1.84
   1  -6  -5    0.70    1.04
  -1  -6   5    2.02    0.77
  -1  -6   5    0.63    1.11
   1   6  -5    3.14    1.68
  -1   6   5    0.55    0.87
   1   6  -5    1.49    0.51
  -1   6   5    1.24    0.85
  -1   6   5    1.31    1.11
   1   6  -5    3.47    1.41
   0  -6   5   71.48    2.01
   0  -6  -5   75.05    2.52
   0  -6   5   69.89    1.75
   0  -6   5   70.02    2.21
   0   6   5   67.73    2.37
   0   6   5   72.69    2.00
   0   6  -5   75.01    4.51
   0   6  -5   71.60    4.41
   1  -6   5    3.04    0.76
   1  -6   5    3.52    1.01
  -1  -6  -5    3.14    1.31
   1  -6   5    2.88    0.84
   1   6   5    1.59    0.84
   1   6   5    3.49    1.38
  -1   6  -5    4.45    2.07
   1   6   5    2.08    1.50
   2  -6   5   13.95    1.48
  -2  -6  -5   16.11    2.22
  -2  -6  -5   15.19    1.83
   2  -6   5   13.49    1.38
  -2   6  -5   12.96    2.47
   2   6   5   15.61    2.27
   2   6   5   16.49    2.42
   2   6   5   13.44    1.17
  -3  -6  -5    0.59    1.55
  -3  -6  -5   -0.42    1.83
   3  -6   5    0.18    1.39
   3  -6   5   -0.32    1.23
   3   6   5   -0.06    1.56
   3   6   5    0.43    2.25
  -3   6  -5   -1.00    2.19
   4  -6   5    4.26    1.60
   4  -6   5    3.24    2.05
  -4  -6  -5    2.43    2.33
   4   6   5    3.88    2.66
   4   6   5    0.86    2.07
  -4   6  -5    7.37    3.67
   5  -7  -5   10.64    2.42
   5  -7  -5   11.19    2.58
   5   7  -5    4.76    3.09
  -5   7   5   20.98    5.41
   4  -7  -5   22.46    2.26
  -4  -7   5   25.73    3.07
  -4   7   5   28.64    5.41
   4   7  -5   27.63    4.54
   4   7  -5   20.29    3.81
  -3  -7   5   11.03    2.30
   3  -7  -5    9.72    1.61
   3  -7  -5   11.93    1.75
   3  -7  -5    8.87    1.22
   3   7  -5    9.23    2.31
   3   7  -5    8.56    2.16
   3   7  -5   11.19    1.86
  -3   7   5    8.32    2.22
  -2  -7   5    8.77    1.07
   2  -7  -5    8.79    1.33
   2  -7  -5    7.67    1.04
  -2  -7   5    8.44    1.79
  -2   7   5    7.86    1.51
   2   7  -5    9.59    1.82
  -2   7   5    8.20    1.64
   2   7  -5   10.14    1.39
   2   7  -5    9.26    1.98
   1  -7  -5   39.33    1.91
  -1  -7   5   41.16    1.60
  -1  -7   5   38.25    2.07
   1   7  -5   40.32    3.32
   1   7  -5   43.16    3.26
  -1   7   5   38.34    2.04
  -1   7   5   38.78    2.02
   1   7  -5   40.04    1.24
   0  -7   5  200.05    3.81
   0  -7  -5  198.20    4.62
   0  -7   5  197.31    4.35
   0  -7   5  199.71    3.83
   0   7   5  204.86    4.63
   0   7   5  199.76    3.87
   0   7   5  197.58    4.56
   0   7  -5  182.82    6.91
   1  -7   5  172.30    3.51
  -1  -7  -5  165.76    4.30
   1  -7   5  167.19    3.53
   1  -7   5  169.88    3.81
   1   7   5  173.41    3.41
  -1   7  -5  158.25    6.23
   1   7   5  161.23    4.20
   1   7   5  167.33    4.25
   1   7   5  161.50    5.16
   2  -7   5   79.72    2.58
  -2  -7  -5   80.89    3.34
  -2  -7  -5   81.47    3.39
   2  -7   5   78.18    2.85
  -2   7  -5   80.53    4.70
   2   7   5   81.83    3.86
   2   7   5   80.47    2.18
   2   7   5   83.06    3.49
  -3  -7  -5   24.89    3.05
  -3  -7  -5   21.96    3.05
   3  -7   5   23.98    2.13
   3  -7   5   23.54    2.24
   3   7   5   25.77    3.29
   3   7   5   24.57    3.37
  -3   7  -5   20.47    4.61
  -4  -7  -5   -0.30    2.19
  -4  -7  -5    3.79    2.12
   4  -7   5   -1.28    1.77
   4   7   5   -1.91    2.05
   4   7   5    0.46    2.65
  -4   7  -5    5.01    3.57
  -4  -8   5    8.97    2.41
   4  -8  -5    4.95    1.67
   4   8  -5    9.00    3.19
  -4   8   5   11.35    3.78
   3  -8  -5   51.21    2.58
  -3  -8   5   50.18    3.39
   3  -8  -5   52.15    2.20
   3   8  -5   56.61    4.27
   3   8  -5   50.01    4.17
  -3   8   5   51.48    4.17
   2  -8  -5   -0.55    1.10
  -2  -8   5    0.64    0.82
  -2  -8   5   -0.92    1.71
   2  -8  -5    0.03    0.84
   2   8  -5    1.30    1.80
  -2   8   5   -0.15    1.22
  -2   8   5    0.14    1.32
   2   8  -5    1.00    1.65
   2   8  -5    1.36    1.08
   1  -8  -5  226.24    4.34
  -1  -8   5  226.02    4.10
  -1  -8   5  214.62    5.20
   1  -8  -5  227.26    5.04
  -1   8   5  219.47    5.04
  -1   8   5  225.18    6.15
   1   8  -5  220.47    4.08
   1   8  -5  216.06    6.66
   1   8  -5  214.73    7.34
   0  -8  -5   19.05    1.95
   0  -8   5   20.64    1.49
   0  -8   5   20.50    1.68
   0   8  -5   26.38    4.06
   0   8   5   16.24    1.47
   0   8   5   17.82    1.89
   0   8   5   20.11    1.08
   1  -8   5   49.34    1.79
  -1  -8  -5   53.47    2.72
   1  -8   5   51.63    2.04
   1  -8   5   50.44    1.93
   1   8   5   50.85    1.83
  -1   8  -5   50.77    4.18
   1   8   5   46.23    2.68
   1   8   5   47.77    2.02
   1   8   5   51.71    3.59
   2  -8   5   12.20    1.69
   2  -8   5    9.48    1.49
  -2  -8  -5    9.76    2.09
   2   8   5   10.20    1.31
  -2   8  -5    9.47    2.63
   2   8   5   15.07    2.51
   2   8   5   14.15    2.88
   3  -8   5   18.32    2.19
  -3  -8  -5   17.34    2.67
  -3  -8  -5   15.48    2.74
   3  -8   5   16.29    2.14
  -3   8  -5   21.24    3.90
   3   8   5   19.73    3.21
   3   8   5   16.82    3.38
  -4  -8  -5    5.57    2.36
  -4  -8  -5    1.91    2.39
   4  -8   5    2.35    1.91
   4   8   5   -0.13    2.75
  -4   8  -5    8.77    4.11
   4   8   5   -0.91    2.19
   4  -9  -5   12.73    2.13
  -4  -9   5   12.54    2.76
  -4   9   5   15.36    4.26
   4   9  -5    6.40    2.83
   4   9  -5   10.92    3.41
   3  -9  -5   15.14    1.71
   3  -9  -5   15.28    1.85
  -3  -9   5   16.88    2.64
   3   9  -5   14.81    2.89
   3   9  -5   14.33    2.69
  -3   9   5   16.83    3.52
   2  -9  -5   28.61    2.07
  -2  -9   5   27.84    2.81
   2  -9  -5   28.76    1.77
  -2  -9   5   26.88    1.51
   2   9  -5   34.65    3.82
   2   9  -5   26.67    3.21
  -2   9   5   27.45    2.64
   2   9  -5   29.30    1.63
  -2   9   5   27.53    2.27
   1  -9  -5    9.03    1.17
  -1  -9   5    9.40    1.13
   1  -9  -5    8.51    1.46
  -1  -9   5    7.56    1.63
  -1   9   5    7.69    1.52
  -1   9   5    7.91    1.49
   1   9  -5   10.22    2.35
   1   9  -5    8.38    1.01
   1   9  -5   10.49    2.52
   0  -9   5   21.69    1.57
   0  -9   5   21.07    1.88
   0  -9  -5   23.01    2.06
   0   9   5   22.85    1.27
   0   9   5   21.12    1.82
   0   9  -5   21.39    1.33
   0   9  -5   24.71    4.09
   1  -9   5    2.38    0.92
  -1  -9  -5    1.89    1.61
   1  -9   5    2.30    0.98
   1  -9   5    1.59    1.07
  -1   9  -5    1.97    2.40
   1   9   5    2.68    1.77
   1   9   5    1.15    0.92
   1   9   5    1.03    1.09
   1   9   5    2.65    2.05
  -2  -9  -5    2.79    2.03
   2  -9   5    2.86    1.27
   2  -9   5    3.50    1.18
   2   9   5    3.02    1.06
  -2   9  -5    2.83    2.61
   2   9   5    6.77    2.34
   2   9   5    5.73    2.12
  -3  -9  -5    1.38    1.73
   3  -9   5    1.48    1.46
   3  -9   5    1.54    1.55
  -3  -9  -5    2.13    2.22
   3   9   5    1.74    2.49
   3   9   5    1.32    2.18
  -3   9  -5    4.05    3.17
   4  -9   5    1.12    2.00
  -4  -9  -5    6.25    2.54
   4   9   5   -1.71    2.48
   4   9   5    1.39    2.80
   4 -10  -5   18.98    2.40
  -4 -10   5   22.92    3.95
   4  10  -5   23.35    4.32
  -4  10   5   27.11    5.54
  -3 -10   5    4.50    2.31
   3 -10  -5    3.53    1.23
   3 -10  -5    4.05    1.42
   3  10  -5    2.75    2.28
  -3  10   5    5.89    2.40
   3  10  -5    2.85    2.24
  -2 -10   5   93.98    4.04
   2 -10  -5   97.58    3.23
   2 -10  -5   97.01    3.00
  -2 -10   5   93.64    2.51
   2  10  -5   93.80    2.62
  -2  10   5   91.89    3.43
   2  10  -5   96.76    5.28
   2  10  -5   89.37    5.10
  -2  10   5   95.95    4.31
   1 -10  -5    0.95    0.87
   1 -10  -5    1.41    1.34
  -1 -10   5   -0.46    1.57
  -1 -10   5    0.64    1.02
   1  10  -5    1.61    2.34
   1  10  -5    0.54    0.79
  -1  10   5    0.39    1.40
  -1  10   5    0.64    1.02
   1  10  -5    0.76    2.42
   0 -10   5   11.48    1.59
   0 -10  -5   10.32    1.33
   0 -10   5   12.02    1.51
   0 -10  -5   11.81    1.85
   0  10   5   11.97    1.23
   0  10  -5   10.80    1.24
   0  10   5   11.90    1.86
   0  10  -5   11.76    3.00
   1 -10   5    0.00    1.04
   1 -10   5    0.40    0.88
  -1 -10  -5    0.32    0.79
  -1 -10  -5    1.20    1.58
   1 -10   5    0.93    1.12
   1  10   5    0.35    1.30
   1  10   5   -1.29    1.69
   1  10   5    3.54    2.53
  -1  10  -5    0.02    2.71
  -2 -10  -5   71.92    2.18
   2 -10   5   73.26    2.84
   2 -10   5   74.45    2.97
  -2 -10  -5   70.44    3.93
   2  10   5   69.73    3.14
   2  10   5   71.66    4.79
   2  10   5   68.81    3.65
  -2  10  -5   72.16    5.32
   3 -10   5   -0.53    1.46
   3 -10   5    0.77    1.51
  -3 -10  -5    1.13    2.41
   3  10   5    3.03    2.55
  -3  10  -5    2.10    3.11
   3  10   5    2.03    2.30
  -4 -10  -5   25.20    3.89
   4 -10   5   21.88    3.04
   4  10   5   18.08    3.45
  -4  10  -5   34.27    6.31
   4 -11  -5   14.82    2.32
  -4 -11   5   18.40    3.20
  -4  11   5   21.47    4.84
   4  11  -5    7.76    3.16
   4  11  -5   13.63    3.80
   3 -11  -5   20.82    2.11
   3 -11  -5   20.35    1.91
  -3 -11   5   20.13    2.92
  -3  11   5   21.59    3.87
   3  11  -5   16.99    3.15
   3  11  -5   19.08    4.11
  -2 -11   5   90.89    4.12
  -2 -11   5   91.52    2.56
   2 -11  -5   89.63    3.21
   2 -11  -5   91.58    3.01
   2  11  -5   88.89    5.73
  -2  11   5   91.29    4.36
   2  11  -5   87.37    5.50
  -2  11   5   88.77    3.65
   2  11  -5   86.76    2.60
  -1 -11   5    0.74    1.04
   1 -11  -5    0.73    1.49
  -1 -11   5    0.64    1.61
   1 -11  -5    0.51    0.93
   1  11  -5    0.17    0.88
  -1  11   5    0.57    1.49
   1  11  -5    3.77    2.89
  -1  11   5    0.90    1.12
   1  11  -5    3.76    2.93
   0 -11  -5  281.56    6.55
   0 -11   5  282.41    5.39
   0 -11   5  284.29    6.30
   0 -11  -5  286.42    5.40
   0  11  -5  264.35    9.54
   0  11   5  284.09    6.94
   0  11   5  270.83    6.31
   0  11  -5  280.30    5.67
  -1 -11  -5   55.52    2.08
   1 -11   5   57.85    2.50
   1 -11   5   56.71    2.38
  -1 -11  -5   58.29    3.39
   1 -11   5   57.16    2.33
   1  11   5   57.48    5.66
   1  11   5   50.02    2.71
   1  11   5   54.99    3.02
  -1  11  -5   53.44    5.74
   2 -11   5   24.09    2.02
  -2 -11  -5   26.07    3.58
  -2 -11  -5   22.73    1.62
   2 -11   5   24.02    2.21
  -2  11  -5   24.48    3.99
   2  11   5   26.24    3.17
   2  11   5   32.30    4.74
  -3 -11  -5   13.24    2.82
   3 -11   5   13.46    2.20
   3 -11   5    9.34    1.82
   3  11   5   11.80    2.80
   3  11   5    8.14    2.80
  -3  11  -5   17.68    4.42
   4 -11   5    3.69    2.04
  -4 -11  -5    9.72    2.93
   4  11   5    0.96    3.15
   4 -12  -5    1.47    1.63
  -4 -12   5    3.01    2.63
  -4  12   5    4.96    3.82
   4  12  -5   -2.60    2.86
   3 -12  -5   19.64    2.03
  -3 -12   5   22.63    3.58
   3 -12  -5   19.46    2.16
   3  12  -5   14.46    3.23
  -3  12   5   23.29    4.30
   3  12  -5   19.06    3.55
  -2 -12   5   -1.56    2.16
   2 -12  -5    0.93    1.66
   2 -12  -5   -0.10    1.25
  -2 -12   5    0.07    1.13
   2  12  -5    0.55    2.73
   2  12  -5    4.37    2.87
  -2  12   5    0.60    1.60
  -2  12   5    0.15    1.53
  -1 -12   5   32.14    1.93
   1 -12  -5   35.50    2.79
  -1 -12   5   30.69    2.90
   1 -12  -5   35.23    2.11
   1  12  -5   41.04    6.30
   1  12  -5   31.23    1.71
  -1  12   5   31.61    2.52
   1  12  -5   39.17    4.91
  -1  12   5   34.75    2.57
   0 -12  -5    8.08    2.12
   0 -12   5    5.76    1.74
   0 -12  -5    5.13    1.19
   0 -12   5    7.70    1.44
   0  12  -5    8.32    3.24
   0  12  -5    8.06    1.36
   0  12   5    7.39    2.02
   0  12   5    7.51    1.55
   1 -12   5    1.56    1.36
   1 -12   5    1.02    1.00
   1 -12   5    2.85    1.43
  -1 -12  -5    1.92    2.20
  -1 -12  -5    2.24    1.04
   1  12   5    1.01    2.01
  -1  12  -5    0.01    3.55
   1  12   5    4.08    3.37
   2 -12   5    0.69    1.27
  -2 -12  -5    1.05    0.94
   2 -12   5   -0.13    1.42
  -2 -12  -5    1.86    2.62
   2  12   5    1.65    2.38
  -2  12  -5   -1.63    3.10
   2  12   5    4.29    2.81
  -3 -12  -5   15.44    3.12
   3 -12   5   13.67    2.22
   3 -12   5   11.31    1.95
   3  12   5    9.55    2.96
  -3  12  -5   23.26    5.18
   3  12   5   17.21    3.01
  -4 -12  -5    4.01    2.91
   4 -12   5    0.82    2.07
  -4  12  -5    8.14    4.71
   4 -13  -5    6.98    2.04
  -4 -13   5   11.06    3.16
   4  13  -5    0.35    3.40
  -4  13   5   15.61    4.61
   3 -13  -5    1.83    1.40
   3 -13  -5    4.07    1.63
  -3 -13   5    4.68    2.74
   3  13  -5    1.27    2.93
   3  13  -5   -1.28    2.86
  -3  13   5    6.11    2.59
  -2 -13   5    2.91    1.23
   2 -13  -5    3.11    1.40
  -2 -13   5    3.53    2.31
   2 -13  -5    4.08    1.80
   2  13  -5    4.64    3.15
  -2  13   5    4.20    1.82
   2  13  -5    5.24    2.85
  -2  13   5    5.23    1.85
  -1 -13   5    4.30    1.33
   1 -13  -5    5.02    1.97
  -1 -13   5    2.56    2.19
   1 -13  -5    4.42    1.33
  -1  13   5    4.86    1.53
  -1  13   5    3.06    1.81
   1  13  -5    7.53    3.56
   1  13  -5    6.59    3.95
   1  13  -5    5.61    1.27
   0 -13   5    0.91    1.78
   0 -13   5    2.23    1.34
   0 -13  -5    2.11    2.08
   0 -13  -5    1.56    1.15
   0  13   5    2.04    1.89
   0  13  -5    3.40    3.34
   0  13  -5    2.18    1.23
   1 -13   5    0.40    1.04
   1 -13   5    0.45    1.39
   1 -13   5   -0.13    1.47
  -1 -13  -5    2.08    2.35
  -1 -13  -5    0.45    1.03
  -1  13  -5   -0.68    4.23
   1  13   5    4.67    4.06
   1  13   5    1.70    2.11
   2 -13   5   11.21    1.83
  -2 -13  -5    8.24    1.30
  -2 -13  -5    7.95    2.73
   2 -13   5    8.29    1.76
  -2  13  -5    9.25    3.72
   2  13   5    9.43    3.22
   2  13   5   10.81    2.60
   3 -13   5    2.14    1.81
   3 -13   5    7.59    1.97
  -3 -13  -5    6.61    3.04
   3  13   5    4.67    3.06
   3  13   5    8.54    2.68
  -3  13  -5   16.59    5.20
  -4 -13  -5    7.85    3.27
   4 -13   5   -2.92    2.18
   4 -13   5    3.29    2.23
   4  13   5   -3.70    3.15
  -4 -14   5   29.40    4.84
   4 -14  -5   20.15    2.66
  -4  14   5   28.05    5.38
   4  14  -5   12.53    4.30
   3 -14  -5    3.69    1.60
   3 -14  -5    4.51    1.59
  -3 -14   5    7.93    2.92
   3  14  -5    1.66    3.27
  -3  14   5    8.44    2.87
   3  14  -5    1.59    3.19
   2 -14  -5   44.36    3.05
  -2 -14   5   41.31    2.25
  -2 -14   5   46.06    3.75
   2 -14  -5   47.29    2.70
   2  14  -5   47.95    5.74
   2  14  -5   42.84    5.41
  -2  14   5   47.86    3.23
  -2  14   5   52.33    3.88
  -1 -14   5    2.50    1.41
   1 -14  -5    2.84    2.16
   1 -14  -5    1.84    1.29
  -1 -14   5    0.89    2.03
  -1  14   5    3.25    1.53
   1  14  -5    3.21    1.30
  -1  14   5    1.56    1.86
   1  14  -5    6.23    4.56
   1  14  -5    4.13    3.83
   0 -14   5    2.62    1.90
   0 -14   5    3.93    1.56
   0 -14  -5    2.79    1.29
   0 -14  -5    6.35    2.44
   0  14   5    3.53    2.03
   0  14  -5    4.04    1.42
   0  14  -5   13.11    4.90
  -1 -14  -5    7.11    2.74
   1 -14   5    5.78    1.71
   1 -14   5    5.69    1.37
  -1 -14  -5    5.61    1.35
   1 -14   5    5.55    1.75
   1  14   5    7.70    2.37
  -1  14  -5    9.36    5.14
   1  14   5    5.97    4.39
  -2 -14  -5   50.16    2.27
  -2 -14  -5   52.79    4.32
   2 -14   5   52.24    2.92
   2 -14   5   46.20    2.82
  -2  14  -5   61.28    6.59
   2  14   5   51.66    5.86
   2  14   5   49.67    3.52
   3 -14   5   -1.15    1.74
   3 -14   5    0.77    1.55
  -3 -14  -5    4.14    3.14
  -3  14  -5   13.64    5.46
   3  14   5    2.39    2.57
   3  14   5   -3.21    3.02
  -3 -15   5    3.66    2.92
   3 -15  -5   -2.53    1.45
   3 -15  -5   -0.85    1.44
  -3  15   5    3.06    2.47
   3  15  -5   -3.75    3.12
  -2 -15   5   12.10    2.73
   2 -15  -5   10.65    1.84
  -2 -15   5    8.91    1.61
   2 -15  -5   10.60    2.20
   2  15  -5    8.03    3.46
   2  15  -5    7.39    3.65
  -2  15   5   15.07    3.15
  -2  15   5   12.34    2.48
   1 -15  -5   10.38    1.72
  -1 -15   5   10.23    1.66
  -1 -15   5    9.84    2.53
   1 -15  -5   12.39    2.49
   1  15  -5   11.85    3.90
  -1  15   5   13.53    2.38
   1  15  -5   11.44    4.42
   1  15  -5   11.38    1.71
   0 -15   5   61.40    2.91
   0 -15   5   60.28    3.58
   0 -15  -5   58.57    3.95
   0 -15  -5   61.16    2.86
   0  15   5   55.67    3.45
   0  15  -5   58.24    2.70
   1 -15   5   32.84    2.61
  -1 -15  -5   32.90    2.20
   1 -15   5   32.79    2.53
  -1 -15  -5   34.81    3.98
   1 -15   5   33.76    2.25
   1  15   5   42.98    8.29
   1  15   5   34.00    3.11
   2 -15   5   18.06    2.15
  -2 -15  -5   15.04    1.79
  -2 -15  -5   21.34    3.48
   2 -15   5   19.91    2.33
   2  15   5   21.12    3.34
   2  15   5   19.97    4.03
   3 -15   5    1.87    1.80
  -3 -15  -5    3.57    3.16
   3  15   5    5.51    2.65
  -3 -16   5   16.79    3.53
   3 -16  -5   17.07    2.55
   3 -16  -5   13.21    2.19
   2 -16  -5    0.53    1.52
  -2 -16   5    2.97    2.59
  -2 -16   5   -2.16    1.31
   2  16  -5   -4.87    3.57
  -2  16   5    0.23    2.04
  -2  16   5    3.08    1.84
   2  16  -5    0.66    3.65
  -1 -16   5    1.98    1.51
  -1 -16   5    3.45    2.46
   1 -16  -5    3.37    2.29
   1 -16  -5    3.36    1.55
   1  16  -5    4.61    4.50
  -1  16   5    2.27    1.98
   1  16  -5    4.86    1.43
   1  16  -5    2.45    3.50
   0 -16   5   -0.42    1.47
   0 -16   5    0.02    1.96
   0 -16  -5   -0.29    1.33
   0 -16  -5    0.03    2.34
   0  16   5   -0.86    1.97
   0  16  -5    0.70    1.37
   1 -16   5   20.29    2.25
  -1 -16  -5   24.27    4.05
   1 -16   5   25.15    2.50
   1 -16   5   23.95    2.00
  -1 -16  -5   21.73    2.14
   1  16   5   27.52    5.27
   1  16   5   25.50    3.21
  -2 -16  -5    1.88    2.98
   2 -16   5    0.83    1.42
  -2 -16  -5   -1.55    1.19
   2 -16   5   -0.72    1.68
   2  16   5    0.44    2.23
  -2  16  -5    8.19    4.36
   2  16   5    3.66    3.85
   3 -16   5   13.72    2.54
  -3 -16  -5   19.21    4.00
   3  16   5   17.49    3.14
   3 -17  -5    5.82    1.97
  -3 -17   5    7.38    3.34
   3 -17  -5    1.68    1.76
  -3  17   5   11.35    3.15
  -2 -17   5   -3.28    1.41
   2 -17  -5    0.47    1.60
  -2 -17   5    0.80    2.65
  -2  17   5    1.62    2.19
   2  17  -5    3.38    3.99
  -1 -17   5   -1.67    1.43
   1 -17  -5   -1.00    2.15
  -1 -17   5    0.65    2.34
   1 -17  -5    0.88    1.51
   1  17  -5   -1.81    3.36
   1  17  -5    4.67    4.27
  -1  17   5    0.46    1.91
   0 -17   5    3.89    1.74
   0 -17   5    8.20    2.39
   0 -17  -5    6.79    2.66
   0 -17  -5    5.83    1.59
   0  17  -5    8.44    1.77
   0  17   5    7.93    2.38
  -1 -17  -5    2.99    2.63
   1 -17   5    0.81    1.73
   1 -17   5    3.80    1.90
   1 -17   5    1.16    1.30
  -1 -17  -5    0.28    1.39
   1  17   5    4.52    2.38
  -1  17  -5    7.02    5.78
   1  17   5    5.57    4.62
  -2 -17  -5    0.66    1.36
   2 -17   5   -0.99    1.72
   2 -17   5    2.54    1.58
  -2 -17  -5    0.96    3.20
   2  17   5    5.05    2.37
   2  17   5    5.24    4.28
  -2  17  -5   12.53    4.73
  -3 -17  -5    9.11    3.89
   3 -17   5    1.15    2.11
   3 -17   5    5.38    2.15
   3  17   5    9.40    2.83
   3 -18  -5    3.25    1.89
  -3 -18   5    6.18    3.38
   3 -18  -5   -0.51    1.86
  -2 -18   5   31.56    4.29
   2 -18  -5   21.55    2.75
   2  18  -5   20.03    4.88
  -2  18   5   22.18    3.20
  -1 -18   5   -2.11    1.64
  -1 -18   5    1.33    2.56
   1 -18  -5    0.84    2.37
   1 -18  -5    0.59    1.54
  -1  18   5    0.94    2.09
   1  18  -5    7.41    4.66
   0 -18   5    8.94    2.50
   0 -18   5    3.26    1.84
   0 -18  -5    4.52    1.74
   0 -18  -5    5.34    2.90
   0  18   5    9.59    2.52
   0  18  -5    7.74    1.79
  -1 -18  -5    0.26    1.52
   1 -18   5    1.35    1.82
  -1 -18  -5   -0.58    2.89
   1 -18   5    1.75    1.43
   1  18   5    2.01    2.37
  -1  18  -5    8.76    6.11
  -2 -18  -5    8.77    1.74
   2 -18   5    4.66    2.09
  -2 -18  -5    8.95    3.57
   2 -18   5   12.17    2.25
   2  18   5   12.20    2.72
   2  18   5    7.11    4.65
   2 -19  -5    3.78    1.91
  -2 -19   5    9.73    3.11
   2  19  -5    2.13    4.83
  -2  19   5    4.88    2.50
   1 -19  -5   15.12    3.03
  -1 -19   5    9.36    2.08
   1 -19  -5   14.19    2.25
  -1 -19   5   17.45    3.16
  -1  19   5   19.81    3.07
   1  19  -5    7.05    4.03
   0 -19  -5    1.22    1.65
   0 -19  -5    3.03    2.86
   0 -19   5    3.67    2.30
   0 -19   5    1.04    1.86
   0  19  -5    5.26    1.74
   0  19   5    5.88    2.45
  -1 -19  -5   18.64    2.26
  -1 -19  -5   20.09    3.83
   1 -19   5   13.27    2.33
   1 -19   5   15.53    2.03
  -1  19  -5   31.99    6.97
   1  19   5   19.27    3.19
  -2 -19  -5   15.33    4.00
   2 -19   5   12.83    2.33
   2  19   5    6.83    5.32
   2  19   5   15.98    2.83
  -2 -20   5    4.29    3.21
   2 -20  -5   -2.18    1.84
  -2  20   5    0.62    2.23
   2  20  -5   -0.06    5.06
  -1 -20   5    3.13    2.65
   1 -20  -5   -0.61    2.65
  -1 -20   5   -4.19    1.79
   1 -20  -5   -0.74    1.73
  -1  20   5    2.85    2.37
   0 -20  -5   -1.30    1.65
   0 -20   5   -1.99    1.82
   0 -20   5    3.44    2.31
   0 -20  -5    0.84    2.99
   0  20  -5    2.53    1.71
   0  20   5    2.90    2.30
   1 -20   5   -3.28    1.91
  -1 -20  -5   -0.78    1.67
   1 -20   5    1.94    1.49
  -1 -20  -5   -0.49    3.18
   1  20   5    3.69    2.56
  -1  20  -5   13.21    5.89
   2 -20   5   -3.09    2.04
   2 -20   5    0.29    1.60
  -2 -20  -5    1.41    3.81
   2  20   5    3.75    2.57
   2  20   5   -2.97    5.27
   1 -21  -5   11.21    2.33
  -1 -21   5   11.63    2.39
   1 -21  -5   15.53    3.28
  -1  21   5   19.65    3.23
   0 -21  -5   -1.48    1.74
   0 -21  -5   -0.34    3.11
   0 -21   5    5.26    2.51
   0 -21   5   -2.40    1.91
   0  21   5    2.43    2.39
  -1 -21  -5   10.08    2.27
   1 -21   5   11.88    2.13
  -1 -21  -5   11.45    3.69
   1 -21   5    6.57    2.39
   1  21   5   19.93    3.29
   0 -22   5   17.39    3.19
   0 -22  -5   14.68    3.69
   0  22   5   15.07    3.14
  -5   0   6   -0.88    4.00
   5   0  -6   -1.47    1.78
   4   0  -6    0.44    1.40
   4   0  -6   -0.48    1.28
  -4   0   6    0.84    2.52
   3   0  -6    0.23    0.48
   3   0  -6   -0.40    0.95
  -3   0   6   -0.19    1.22
  -3   0   6   -0.16    1.53
   3   0  -6    0.13    0.85
  -2   0   6   46.57    1.39
  -2   0   6   44.13    1.94
   2   0  -6   45.44    2.29
  -2   0   6   44.59    2.89
   2   0  -6   44.65    1.48
  -1   0   6   -0.14    0.88
  -1   0   6   -0.81    0.71
   1   0  -6    0.17    0.56
  -1   0   6   -0.62    0.55
   0   0  -6  236.35    6.81
   0   0   6  254.83    4.61
   0   0   6  256.64    4.99
   0   0   6  259.52    4.22
  -1   0  -6   -0.16    0.79
   1   0   6    0.70    1.07
   1   0   6    0.25    0.46
   1   0   6   -0.25    0.84
  -1   0  -6   -1.06    1.30
  -2   0  -6   10.06    2.07
   2   0   6   11.66    1.27
  -2   0  -6   12.50    1.27
   2   0   6   13.13    1.69
   2   0   6   11.00    1.35
   3   0   6   -0.33    0.99
   3   0   6    0.10    0.97
  -3   0  -6    0.59    1.26
  -3   0  -6   -0.02    1.77
   3   0   6    1.04    1.71
   4   0   6    9.04    2.00
   4   0   6   10.12    2.55
  -4   0  -6   16.41    4.11
  -5   0  -6    4.42    4.17
   5   0   6   -3.05    1.94
   5  -1  -6   12.60    2.73
   5   1  -6   13.85    2.93
  -5   1   6   23.02    5.55
  -4  -1   6   22.84    2.31
   4  -1  -6   23.83    2.96
  -4  -1   6   21.76    4.73
   4  -1  -6   24.83    2.08
  -4   1   6   23.18    4.42
   4   1  -6   23.84    3.06
   4   1  -6   21.88    2.10
   3  -1  -6   46.60    2.96
   3  -1  -6   49.16    1.39
   3  -1  -6   51.22    2.08
  -3  -1   6   48.83    2.43
  -3  -1   6   51.36    3.87
  -3   1   6   47.64    2.39
   3   1  -6   52.15    3.10
  -3   1   6   49.38    3.75
   3   1  -6   51.01    2.03
  -2  -1   6    4.89    1.17
  -2  -1   6    5.90    0.73
   2  -1  -6    6.06    0.84
   2  -1  -6    4.02    0.92
  -2  -1   6    5.07    1.51
  -2   1   6    5.06    1.11
   2   1  -6    4.18    0.96
  -2   1   6    6.14    0.78
  -2   1   6    4.46    1.42
   2   1  -6    4.76    0.71
  -1  -1   6    1.51    0.93
  -1  -1   6    1.97    0.76
  -1  -1   6    2.41    0.53
   1   1  -6    2.11    0.67
  -1   1   6    2.38    1.02
  -1   1   6    1.84    0.74
   1   1  -6    1.49    1.09
  -1   1   6    3.02    1.11
  -1   1   6    1.52    0.81
   0  -1  -6  160.23    4.73
   0  -1   6  158.99    3.09
   0  -1   6  165.56    3.55
   0  -1   6  159.53    3.00
   0   1  -6  146.98    5.30
   0   1   6  167.34    3.70
   0   1   6  160.43    3.40
   0   1   6  163.76    3.06
   1  -1   6  135.18    3.10
   1  -1   6  133.26    2.72
  -1  -1  -6  127.97    4.11
  -1  -1  -6  133.76    3.13
   1   1   6  130.81    3.25
   1   1   6  134.13    2.69
   1   1   6  133.29    3.38
  -1   1  -6  131.84    4.49
   2  -1   6   69.99    2.05
   2  -1   6   69.61    2.78
   2  -1   6   69.82    2.56
  -2  -1  -6   69.55    2.29
  -2  -1  -6   69.38    3.44
   2   1   6   71.51    1.96
   2   1   6   72.35    2.78
   2   1   6   71.85    2.85
  -2   1  -6   72.60    3.68
  -2   1  -6   67.86    1.97
  -3  -1  -6   86.51    4.83
   3  -1   6   85.31    3.48
   3  -1   6   86.25    2.44
   3  -1   6   87.36    3.84
  -3  -1  -6   80.30    2.84
   3   1   6   83.53    2.31
   3   1   6   84.05    3.60
  -3   1  -6   85.88    4.99
   3   1   6   81.97    3.87
   4  -1   6   -0.45    2.04
  -4  -1  -6    1.38    2.92
   4  -1   6    0.16    1.37
   4   1   6    0.19    2.17
  -4   1  -6    3.72    3.38
   4   1   6    0.02    1.49
   5  -1   6    6.27    2.47
   5  -1   6    3.61    3.22
   5   1   6    1.69    3.17
   5   1   6    5.24    2.70
   5  -2  -6    1.71    2.04
  -5  -2   6    6.76    5.12
   5  -2  -6    3.36    2.12
  -5   2   6    9.27    4.52
   5   2  -6    1.71    2.28
  -4  -2   6    4.92    1.70
   4  -2  -6    2.03    1.45
  -4  -2   6    2.92    2.81
   4  -2  -6    3.49    1.42
   4   2  -6    2.15    1.64
   4   2  -6    1.91    1.56
  -4   2   6    2.06    2.40
  -3  -2   6   28.08    2.33
   3  -2  -6   28.59    1.21
   3  -2  -6   26.19    2.36
   3  -2  -6   27.48    1.70
  -3  -2   6   28.43    3.30
  -3   2   6   27.05    1.99
   3   2  -6   27.64    1.62
   3   2  -6   27.14    2.60
  -3   2   6   25.90    3.03
  -2  -2   6    2.62    0.63
  -2  -2   6    2.43    1.15
  -2  -2   6    2.04    1.39
   2  -2  -6    2.25    0.73
   2   2  -6    2.05    0.60
  -2   2   6    1.86    0.69
   2   2  -6    2.64    0.96
  -2   2   6    2.08    1.23
  -2   2   6    1.89    1.02
  -1  -2   6   14.16    1.47
  -1  -2   6   15.99    1.12
   1   2  -6   16.32    0.51
  -1   2   6   16.76    1.18
   1   2  -6   19.07    1.46
  -1   2   6   17.26    1.44
  -1   2   6   17.16    1.18
  -1   2   6   18.39    1.63
   1   2  -6   16.77    1.96
   0  -2   6   16.27    1.29
   0  -2   6   19.28    0.97
   0   2   6   15.41    1.32
   0   2   6   17.61    1.64
   0   2   6   15.47    1.60
  -1  -2  -6    2.91    1.05
   1  -2   6    6.69    1.06
   1  -2   6    6.11    0.93
  -1  -2  -6    5.09    1.07
   1  -2   6    4.99    0.94
   1   2   6    5.37    1.07
   1   2   6    3.76    0.90
  -1   2  -6    4.17    1.67
   1   2   6    6.95    1.43
   2  -2   6  138.73    2.99
  -2  -2  -6  135.01    3.51
  -2  -2  -6  142.68    4.93
   2  -2   6  140.84    3.78
  -2   2  -6  135.80    2.88
  -2   2  -6  142.42    5.37
   2   2   6  140.46    3.90
   2   2   6  141.98    4.31
   2   2   6  141.17    2.88
   3  -2   6   16.53    2.28
  -3  -2  -6   12.70    2.78
   3  -2   6   14.89    2.03
  -3  -2  -6   14.42    2.02
   3  -2   6   17.58    1.68
   3   2   6   14.27    2.18
  -3   2  -6   15.36    3.50
   3   2   6   17.16    1.43
   3   2   6   18.29    2.56
   4  -2   6    9.51    2.47
   4  -2   6    7.57    1.89
  -4  -2  -6   14.37    3.39
   4   2   6    6.57    2.08
   4   2   6    7.62    2.52
  -5  -2  -6    2.24    3.80
  -5   2  -6    5.35    4.50
   5  -3  -6   29.77    2.92
   5  -3  -6   35.05    4.20
  -5  -3   6   33.90    7.12
  -5   3   6   41.25    6.59
   5   3  -6   27.56    4.34
  -4  -3   6   12.43    2.09
   4  -3  -6   12.33    1.87
  -4  -3   6   12.53    3.67
   4  -3  -6    9.29    1.92
  -4   3   6   11.29    3.13
   4   3  -6    9.45    2.23
  -3  -3   6   21.36    3.29
   3  -3  -6   20.34    2.18
   3  -3  -6   20.62    1.55
   3  -3  -6   21.36    1.22
  -3  -3   6   20.04    2.33
   3   3  -6   20.90    2.55
   3   3  -6   19.83    1.54
  -3   3   6   20.94    2.92
  -3   3   6   22.75    1.91
   2  -3  -6    2.84    0.78
  -2  -3   6    1.74    1.18
  -2  -3   6    2.51    0.63
  -2   3   6    2.10    0.78
  -2   3   6    2.32    1.27
   2   3  -6    2.40    1.00
  -2   3   6    2.78    1.04
   2   3  -6    2.56    0.67
   2   3  -6    1.54    1.21
  -1  -3   6   79.21    1.87
  -1  -3   6   76.32    2.50
  -1   3   6   79.47    2.05
  -1   3   6   79.26    2.51
  -1   3   6   78.96    2.98
  -1   3   6   79.89    2.23
   1   3  -6   81.44    3.52
   1   3  -6   82.82    2.74
   0  -3   6   88.71    2.42
   0  -3  -6   96.12    2.79
   0  -3   6   88.67    2.18
   0  -3   6   89.83    1.95
   0   3  -6   88.17    4.75
   0   3   6   84.62    2.67
   0   3   6   89.04    2.26
   1  -3   6   73.29    1.94
   1  -3   6   74.25    2.18
  -1  -3  -6   74.20    2.56
  -1  -3  -6   74.81    2.38
   1  -3   6   74.81    2.04
   1   3   6   73.35    2.01
   1   3   6   73.46    2.59
   1   3   6   75.00    2.55
  -1   3  -6   73.27    3.68
  -2  -3  -6   44.98    2.66
   2  -3   6   46.08    2.18
  -2  -3  -6   45.99    2.21
   2  -3   6   44.73    1.82
   2   3   6   46.33    2.41
  -2   3  -6   45.14    3.30
  -2   3  -6   43.73    1.31
   2   3   6   42.57    2.44
   2   3   6   45.91    1.64
   3  -3   6   17.19    2.07
   3  -3   6   15.61    1.77
  -3  -3  -6   13.77    2.65
  -3  -3  -6   15.54    2.14
   3  -3   6   15.68    2.15
   3   3   6   15.69    2.34
   3   3   6   18.50    2.72
  -3   3  -6   19.65    3.29
   4  -3   6    4.23    2.17
  -4  -3  -6    6.84    2.82
   4  -3   6    4.90    1.67
  -4   3  -6   12.52    3.97
   4   3   6    2.39    2.48
   4   3   6    2.35    1.87
  -5  -3  -6    3.26    3.39
   5  -3   6   -0.95    1.85
  -5   3  -6   11.25    5.95
   5  -4  -6   -0.92    1.68
   5  -4  -6    0.00    1.81
  -5  -4   6   -4.88    5.25
   5   4  -6   -3.45    2.04
  -5   4   6    1.00    4.09
   4  -4  -6   11.88    1.89
  -4  -4   6   13.10    3.88
  -4  -4   6   13.76    2.20
   4  -4  -6    8.14    1.78
  -4   4   6   12.78    3.41
   4   4  -6    9.40    2.29
  -3  -4   6   -0.13    1.52
   3  -4  -6    0.45    0.73
   3  -4  -6    0.13    0.91
  -3  -4   6    2.18    2.14
  -3   4   6   -0.77    1.53
  -3   4   6    0.79    1.24
   3   4  -6   -0.27    1.14
   3   4  -6    0.31    1.34
  -2  -4   6  207.81    5.03
  -2  -4   6  209.54    3.51
  -2   4   6  217.10    3.99
  -2   4   6  215.71    4.83
   2   4  -6  210.69    6.88
  -2   4   6  213.76    6.68
  -2   4   6  210.65    4.68
   2   4  -6  210.28    3.91
   2   4  -6  225.28    6.15
  -1  -4   6   60.95    1.68
  -1  -4   6   60.96    2.19
   1   4  -6   63.01    2.66
   1   4  -6   63.37    3.32
  -1   4   6   60.03    1.87
  -1   4   6   60.47    2.06
  -1   4   6   62.19    2.55
  -1   4   6   61.03    2.30
   0  -4   6  132.45    2.76
   0  -4   6  131.32    2.58
   0  -4   6  129.63    3.10
   0  -4  -6  139.12    3.35
   0   4   6  123.87    3.33
   0   4  -6  125.31    5.72
   0   4   6  130.44    2.78
   1  -4   6   86.52    2.37
  -1  -4  -6   83.54    2.66
   1  -4   6   86.97    2.27
  -1  -4  -6   85.26    2.67
   1  -4   6   86.06    2.11
  -1   4  -6   86.00    4.12
   1   4   6   83.28    2.97
   1   4   6   84.28    2.87
   1   4   6   87.31    2.21
   2  -4   6   18.64    1.57
  -2  -4  -6   17.35    1.88
  -2  -4  -6   17.74    1.97
   2  -4   6   17.57    1.59
   2   4   6   18.19    2.04
  -2   4  -6   14.94    2.84
   2   4   6   17.85    1.26
   2   4   6   18.96    1.96
   3  -4   6    1.57    1.54
  -3  -4  -6    0.59    1.75
  -3  -4  -6    1.16    1.67
   3  -4   6    1.38    1.22
  -3   4  -6    0.74    2.28
   3   4   6    3.34    2.16
   3   4   6    1.33    1.37
   4  -4   6   15.26    2.59
   4  -4   6   16.35    2.74
  -4  -4  -6   18.19    3.84
   4   4   6   17.02    3.03
   4   4   6   14.49    2.63
  -4   4  -6   24.37    5.09
  -5  -4  -6    3.71    3.45
   5  -4   6    1.91    1.99
  -5   4  -6    9.75    5.75
   5  -5  -6   -0.58    1.71
   5  -5  -6   -2.50    1.63
   5   5  -6   -3.97    2.18
  -5   5   6    2.67    4.13
   4  -5  -6    3.93    1.48
  -4  -5   6    5.02    1.95
   4  -5  -6    3.47    1.53
  -4   5   6    4.69    2.86
   4   5  -6    3.87    2.08
   3  -5  -6   47.07    2.31
   3  -5  -6   47.43    1.81
  -3  -5   6   44.25    2.90
  -3   5   6   45.35    3.64
   3   5  -6   47.02    2.18
  -3   5   6   44.88    2.39
   3   5  -6   47.53    3.26
   3   5  -6   45.39    3.67
  -2  -5   6   24.00    2.04
  -2  -5   6   24.22    1.13
  -2   5   6   24.54    1.70
   2   5  -6   25.00    2.34
   2   5  -6   26.45    1.26
   2   5  -6   24.60    2.54
  -2   5   6   26.37    1.86
  -2   5   6   25.68    2.27
  -1  -5   6   64.08    1.79
  -1  -5   6   62.16    2.42
  -1   5   6   62.23    2.23
   1   5  -6   63.91    3.53
  -1   5   6   63.58    1.99
  -1   5   6   62.31    2.56
   1   5  -6   65.09    2.91
   0  -5   6  216.94    3.89
   0  -5   6  218.55    4.53
   0  -5   6  217.00    3.90
   0  -5  -6  216.33    4.76
   0   5   6  208.30    4.63
   0   5  -6  196.60    7.30
   0   5   6  214.14    3.93
  -1  -5  -6    1.31    0.63
  -1  -5  -6    2.83    1.27
   1  -5   6    1.24    0.92
   1  -5   6    1.38    0.75
   1  -5   6    2.02    0.81
   1   5   6    0.64    0.85
   1   5   6    2.70    1.23
  -1   5  -6    1.40    1.99
   1   5   6    2.31    1.47
   2  -5   6   13.91    1.48
  -2  -5  -6   15.18    1.99
  -2  -5  -6   14.77    1.80
   2  -5   6   15.26    1.53
  -2   5  -6   14.47    2.60
   2   5   6   14.97    2.04
   2   5   6   17.28    2.33
   2   5   6   14.62    1.27
  -3  -5  -6   62.18    3.14
   3  -5   6   66.90    2.52
  -3  -5  -6   62.18    3.89
   3  -5   6   66.96    3.12
   3   5   6   66.21    3.63
   3   5   6   70.70    4.03
  -3   5  -6   69.01    5.28
   4  -5   6   17.09    2.75
   4  -5   6   14.42    2.63
  -4  -5  -6   15.40    3.40
   4   5   6   11.95    2.58
   4   5   6   13.86    2.95
  -4   5  -6   24.18    5.31
   5  -6  -6   -0.18    1.83
   5  -6  -6    2.16    1.95
  -5   6   6    1.92    4.44
   4  -6  -6    8.42    1.85
   4  -6  -6   11.13    1.90
  -4  -6   6   13.03    2.40
   4   6  -6   14.09    3.20
  -4   6   6   14.54    3.69
   4   6  -6    6.74    2.37
   3  -6  -6   63.51    2.66
   3  -6  -6   65.43    2.17
  -3  -6   6   62.87    3.31
   3   6  -6   64.16    2.57
  -3   6   6   64.04    4.26
   3   6  -6   64.05    4.35
  -3   6   6   63.31    2.82
   3   6  -6   66.57    4.07
   2  -6  -6    8.46    1.04
  -2  -6   6    9.24    1.78
  -2  -6   6    9.03    1.05
   2   6  -6   11.10    1.19
  -2   6   6   10.02    1.53
  -2   6   6    8.51    1.46
  -2   6   6    8.47    1.90
   2   6  -6    7.82    1.56
   2   6  -6    9.05    1.96
  -1  -6   6   50.45    2.33
  -1  -6   6   52.91    1.74
   1  -6  -6   51.64    2.23
   1   6  -6   53.94    3.59
  -1   6   6   50.94    2.18
  -1   6   6   51.65    1.92
   1   6  -6   53.26    3.02
  -1   6   6   51.13    2.31
   0  -6   6  244.97    4.33
   0  -6  -6  241.64    5.23
   0  -6   6  237.73    4.31
   0  -6   6  233.80    4.91
   0   6   6  228.79    5.07
   0   6  -6  221.76    7.77
   0   6   6  237.24    4.32
   1  -6   6    2.00    0.81
   1  -6   6    2.18    0.83
   1  -6   6    2.83    1.06
  -1  -6  -6    2.14    1.29
  -1  -6  -6    1.29    0.61
   1   6   6    2.73    1.33
   1   6   6    2.62    1.73
  -1   6  -6   -0.52    2.13
   1   6   6    1.40    0.89
   2  -6   6  129.69    3.22
   2  -6   6  126.05    3.65
  -2  -6  -6  126.97    3.96
  -2  -6  -6  127.35    4.37
   2   6   6  126.83    2.80
   2   6   6  125.03    4.14
  -2   6  -6  132.13    5.84
   2   6   6  123.00    4.48
   3  -6   6   23.28    2.12
  -3  -6  -6   21.68    2.91
   3  -6   6   21.90    2.16
  -3  -6  -6   23.03    2.77
  -3   6  -6   23.72    4.73
   3   6   6   24.07    3.06
   3   6   6   24.11    3.41
  -4  -6  -6    1.25    2.14
   4  -6   6   -2.03    1.86
   4  -6   6    1.54    1.35
  -4   6  -6    5.30    3.73
   4   6   6   -1.30    2.62
   4   6   6   -2.00    1.89
   5  -7  -6   18.48    3.71
   5  -7  -6   15.64    2.67
  -5   7   6   26.23    6.06
   4  -7  -6    8.21    1.82
  -4  -7   6    8.26    2.28
  -4   7   6    9.82    3.38
   4   7  -6   10.36    3.33
   4   7  -6    4.76    2.30
   3  -7  -6    5.67    1.43
  -3  -7   6    4.90    2.09
   3  -7  -6    6.09    1.17
  -3   7   6    3.40    1.99
   3   7  -6    5.01    2.03
   3   7  -6    6.08    2.23
   2  -7  -6   11.82    1.25
  -2  -7   6   13.04    2.03
   2  -7  -6   11.22    1.60
  -2  -7   6   12.91    1.18
   2   7  -6   10.63    2.45
  -2   7   6   11.74    1.91
   2   7  -6   15.57    2.67
   2   7  -6   15.06    1.23
  -2   7   6   13.19    1.73
  -1  -7   6   22.01    1.34
   1  -7  -6   23.26    1.74
  -1  -7   6   22.43    1.96
  -1   7   6   19.55    1.60
   1   7  -6   22.66    0.85
   1   7  -6   23.43    3.05
   1   7  -6   28.73    3.27
  -1   7   6   22.27    1.64
  -1   7   6   22.18    1.56
   0  -7   6   61.35    2.23
   0  -7   6   65.30    2.10
   0  -7   6   63.71    1.71
   0  -7  -6   59.95    2.41
   0   7   6   59.83    2.55
   0   7   6   61.43    2.11
   0   7  -6   67.92    5.02
   1  -7   6   47.56    1.82
   1  -7   6   47.68    1.69
   1  -7   6   49.22    2.01
  -1  -7  -6   46.13    2.50
   1   7   6   44.04    1.59
   1   7   6   46.33    1.87
  -1   7  -6   48.62    4.07
   1   7   6   46.06    2.66
   1   7   6   47.98    3.12
   2  -7   6    1.50    1.10
   2  -7   6    2.25    1.23
  -2  -7  -6    1.41    1.11
  -2  -7  -6    1.69    1.84
  -2   7  -6    1.15    2.33
   2   7   6    1.80    0.89
   2   7   6    4.20    2.16
   2   7   6    2.22    1.53
  -3  -7  -6    2.41    1.64
   3  -7   6    3.90    1.65
  -3  -7  -6    1.81    2.15
   3  -7   6    3.20    1.45
   3   7   6    2.18    1.86
   3   7   6    4.28    2.58
  -3   7  -6    2.20    2.90
  -4  -7  -6    8.18    2.31
   4  -7   6    7.21    1.77
   4  -7   6    5.09    2.20
  -4  -7  -6    5.09    2.50
   4   7   6    1.56    2.31
  -4   7  -6   12.19    4.46
   4   7   6    3.73    2.86
  -4  -8   6   37.90    3.55
   4  -8  -6   32.87    2.55
   4   8  -6   33.63    5.09
   4   8  -6   24.79    4.17
  -4   8   6   34.29    5.19
   3  -8  -6    3.20    1.12
   3  -8  -6    1.86    1.22
  -3  -8   6    1.30    2.03
   3   8  -6    3.39    2.05
  -3   8   6    3.08    1.95
   3   8  -6    2.86    2.15
   2  -8  -6  238.67    4.72
  -2  -8   6  235.16    4.17
   2  -8  -6  244.81    5.45
  -2  -8   6  239.29    6.03
  -2   8   6  238.71    7.38
   2   8  -6  233.28    8.04
  -2   8   6  234.26    5.61
   2   8  -6  231.81    4.36
   2   8  -6  230.89    7.26
   1  -8  -6   34.21    2.11
  -1  -8   6   32.25    1.58
  -1  -8   6   31.52    2.25
  -1   8   6   32.98    1.92
   1   8  -6   32.25    1.12
  -1   8   6   34.75    1.83
   1   8  -6   36.20    3.58
  -1   8   6   32.18    1.92
   1   8  -6   33.19    3.50
   0  -8   6   63.20    2.16
   0  -8   6   62.59    1.77
   0  -8   6   58.66    2.30
   0  -8  -6   62.67    2.67
   0   8   6   61.98    2.67
   0   8   6   61.33    2.18
   0   8  -6   62.50    4.81
   1  -8   6   46.46    1.75
   1  -8   6   43.28    2.00
   1  -8   6   46.06    1.84
  -1  -8  -6   44.94    2.68
   1   8   6   40.94    1.71
   1   8   6   43.40    2.80
   1   8   6   44.53    3.67
   1   8   6   44.16    1.90
  -1   8  -6   44.71    4.30
  -2  -8  -6   19.27    1.97
  -2  -8  -6   19.71    2.77
   2  -8   6   20.29    1.74
   2  -8   6   21.47    1.90
   2   8   6   23.43    3.34
   2   8   6   21.34    1.57
  -2   8  -6   17.49    3.92
   2   8   6   22.79    2.99
  -3  -8  -6    8.37    2.39
   3  -8   6    5.52    1.59
  -3  -8  -6    7.97    2.01
   3  -8   6    6.24    1.74
  -3   8  -6    9.38    3.41
   3   8   6    6.44    2.15
   3   8   6    9.06    2.76
  -4  -8  -6   19.90    3.39
   4  -8   6   17.22    2.78
  -4  -8  -6   24.85    3.31
   4   8   6   22.25    3.54
   4   8   6   13.65    3.04
  -4  -9   6    3.63    2.36
   4  -9  -6    0.28    1.43
  -4   9   6    1.41    3.38
   4   9  -6   -1.00    2.28
   4   9  -6    0.41    2.79
   3  -9  -6   13.11    1.59
   3  -9  -6   14.65    1.83
  -3  -9   6   17.13    2.62
   3   9  -6   13.54    2.70
  -3   9   6   15.30    3.26
   3   9  -6   14.75    3.10
  -2  -9   6   44.66    1.81
   2  -9  -6   45.31    2.41
   2  -9  -6   46.20    2.14
  -2  -9   6   42.98    3.08
  -2   9   6   45.77    3.09
   2   9  -6   45.04    4.05
   2   9  -6   48.90    4.12
  -2   9   6   44.47    2.61
   2   9  -6   46.61    1.65
   1  -9  -6   50.10    2.52
   1  -9  -6   48.84    1.99
  -1  -9   6   50.90    1.99
  -1  -9   6   48.22    2.66
   1   9  -6   52.13    4.29
  -1   9   6   49.07    2.49
   1   9  -6   49.52    1.51
   1   9  -6   47.07    4.16
  -1   9   6   49.29    2.37
   0  -9   6   35.78    2.02
   0  -9   6   36.58    1.42
   0  -9   6   37.13    1.87
   0  -9  -6   36.59    2.41
   0   9  -6   39.78    4.76
   0   9   6   36.22    1.90
   0   9   6   37.48    1.30
   0   9   6   33.65    2.13
   1  -9   6   18.68    1.46
   1  -9   6   17.92    1.72
   1  -9   6   17.79    1.39
  -1  -9  -6   18.04    2.46
   1   9   6   18.84    2.47
   1   9   6   24.30    3.73
  -1   9  -6   20.86    4.28
   1   9   6   17.55    1.63
  -2  -9  -6    3.59    1.95
   2  -9   6    2.87    1.39
   2  -9   6    3.57    1.31
   2   9   6    4.64    2.28
   2   9   6    3.76    1.11
   2   9   6    3.65    1.01
   2   9   6    4.37    2.11
  -2   9  -6    1.15    2.58
   3  -9   6   14.81    2.23
  -3  -9  -6   13.58    2.60
   3  -9   6   11.09    1.79
  -3  -9  -6   10.84    2.21
   3   9   6    9.88    2.51
   3   9   6   12.97    2.92
  -3   9  -6   18.02    4.02
  -4  -9  -6   16.69    2.91
   4  -9   6   15.06    2.74
   4   9   6   10.92    3.33
  -4 -10   6    6.93    2.70
   4 -10  -6    2.61    1.64
  -4  10   6    7.29    3.66
   4  10  -6    3.83    3.38
   4  10  -6    0.30    2.69
   3 -10  -6    8.08    1.45
   3 -10  -6    8.98    1.75
  -3 -10   6   12.36    2.64
   3  10  -6    8.53    2.71
   3  10  -6    8.94    2.73
  -3  10   6   10.17    2.60
   2 -10  -6    7.23    1.64
  -2 -10   6    4.91    2.15
   2 -10  -6    4.37    1.20
  -2 -10   6    6.74    1.17
   2  10  -6    8.84    2.52
   2  10  -6    6.44    2.56
  -2  10   6    6.55    1.84
  -2  10   6    6.34    1.65
   2  10  -6    7.33    1.16
  -1 -10   6   50.85    2.02
   1 -10  -6   47.34    2.00
  -1 -10   6   46.10    2.82
   1 -10  -6   47.59    2.56
   1  10  -6   50.03    4.62
   1  10  -6   58.11    5.15
  -1  10   6   47.30    2.43
  -1  10   6   47.71    2.65
   1  10  -6   47.36    1.62
   0 -10   6  103.02    2.93
   0 -10   6  100.35    2.59
   0 -10  -6  104.24    3.62
   0 -10   6   96.72    3.27
   0  10  -6  101.37    6.35
   0  10   6  102.51    2.78
   0  10   6   96.10    3.32
   1 -10   6    9.71    1.23
   1 -10   6   12.85    1.63
   1 -10   6    8.59    1.47
  -1 -10  -6   12.43    2.18
   1  10   6   11.29    1.38
   1  10   6   12.64    2.25
   1  10   6   12.24    2.86
  -1  10  -6   12.61    3.25
   2 -10   6   60.01    2.82
   2 -10   6   62.46    2.77
  -2 -10  -6   61.32    3.88
   2  10   6   63.17    3.68
  -2  10  -6   64.44    5.55
   2  10   6   63.02    4.66
  -3 -10  -6    3.88    2.55
   3 -10   6    2.97    1.65
   3 -10   6    4.08    1.66
   3  10   6    3.01    2.42
  -3  10  -6    7.38    3.58
   3  10   6    6.29    2.71
   4 -10   6   -1.14    1.96
  -4 -10  -6    0.27    2.42
  -4  10  -6    7.56    4.60
   4  10   6   -4.17    2.95
   4 -11  -6   20.10    2.43
  -4 -11   6   29.10    3.98
  -4  11   6   29.30    5.65
   4  11  -6   21.77    4.28
   3 -11  -6   36.82    2.52
  -3 -11   6   35.77    3.66
   3 -11  -6   33.30    2.17
   3  11  -6   31.15    4.64
  -3  11   6   40.90    4.46
   3  11  -6   32.13    4.37
   2 -11  -6    1.18    1.15
  -2 -11   6    2.13    2.25
  -2 -11   6    1.97    1.19
   2 -11  -6    0.47    1.61
   2  11  -6    4.12    2.77
   2  11  -6    3.81    2.67
  -2  11   6    0.84    1.71
  -2  11   6    2.14    1.45
  -1 -11   6   13.38    2.16
   1 -11  -6   15.22    1.70
  -1 -11   6   12.93    1.62
   1 -11  -6   16.47    2.27
   1  11  -6   14.64    3.40
  -1  11   6   14.62    2.24
   1  11  -6   14.67    1.25
   1  11  -6   16.56    3.53
  -1  11   6   13.85    1.74
   0 -11   6   56.90    2.28
   0 -11   6   56.73    2.68
   0 -11  -6   58.23    3.11
   0 -11  -6   55.30    2.27
   0  11  -6   59.96    5.83
   0  11   6   56.99    2.01
   0  11   6   52.60    2.92
   1 -11   6   15.92    1.42
   1 -11   6   17.55    2.01
  -1 -11  -6   15.69    1.58
   1 -11   6   15.18    1.75
  -1 -11  -6   16.89    2.57
   1  11   6   16.57    3.32
   1  11   6   19.49    2.51
  -1  11  -6   18.09    3.98
  -2 -11  -6   24.25    1.61
   2 -11   6   23.78    2.06
   2 -11   6   22.35    2.23
  -2 -11  -6   21.23    3.12
  -2  11  -6   23.67    5.36
   2  11   6   30.24    4.67
   2  11   6   20.99    3.23
  -3 -11  -6   10.07    2.79
   3 -11   6    6.35    1.82
   3 -11   6    8.56    1.96
  -3  11  -6   13.49    4.39
   3  11   6   11.60    2.93
   3  11   6    4.39    2.74
  -4 -11  -6    6.01    2.77
   4 -11   6    1.11    2.06
  -4  11  -6   15.53    5.81
   4  11   6   -2.65    3.14
  -4 -12   6    9.26    2.95
   4 -12  -6    5.40    1.89
  -4  12   6   14.15    4.38
   4  12  -6    2.09    3.42
  -3 -12   6    6.33    2.38
   3 -12  -6    6.72    1.75
   3 -12  -6    4.98    1.46
   3  12  -6    3.46    2.60
  -3  12   6    9.13    2.72
   3  12  -6    4.09    2.86
  -2 -12   6   42.22    2.17
   2 -12  -6   41.96    2.78
  -2 -12   6   41.58    3.57
   2 -12  -6   43.26    2.41
   2  12  -6   48.79    5.49
  -2  12   6   42.18    3.19
   2  12  -6   42.34    4.87
  -2  12   6   41.04    2.93
   1 -12  -6   14.15    1.77
  -1 -12   6   15.92    2.39
  -1 -12   6   15.28    1.86
   1 -12  -6   14.98    2.56
   1  12  -6   15.69    3.99
  -1  12   6   15.46    1.94
   1  12  -6   14.06    1.37
   1  12  -6   17.02    3.83
  -1  12   6   16.60    2.30
   0 -12  -6   43.83    3.10
   0 -12  -6   39.96    2.14
   0 -12   6   41.20    2.61
   0 -12   6   42.24    2.28
   0  12   6   39.73    2.81
   0  12  -6   44.25    5.98
   1 -12   6    0.28    1.26
   1 -12   6    1.14    1.00
  -1 -12  -6    1.15    2.01
   1 -12   6    1.09    1.32
  -1 -12  -6    0.79    1.02
   1  12   6    2.95    3.45
  -1  12  -6   -0.02    3.73
   1  12   6    1.95    2.00
  -2 -12  -6    1.51    2.69
   2 -12   6    2.79    1.42
  -2 -12  -6    3.26    1.05
   2 -12   6    1.56    1.57
   2  12   6    3.09    2.42
   2  12   6    5.91    2.91
  -2  12  -6    0.24    3.52
   3 -12   6   14.16    2.31
  -3 -12  -6   20.83    3.43
   3 -12   6   13.84    2.12
   3  12   6   20.01    3.13
   3  12   6   13.01    3.18
   4 -12   6    5.05    2.31
  -4 -12  -6    8.17    3.20
  -4  12  -6   19.04    6.33
   4  12   6   -2.04    3.23
   4 -13  -6    5.89    2.01
  -4 -13   6    9.88    3.21
  -4  13   6   14.18    4.49
   4  13  -6    2.74    3.61
  -3 -13   6    4.57    2.60
   3 -13  -6    0.94    1.47
   3 -13  -6   -0.46    1.30
   3  13  -6   -1.93    2.89
  -3  13   6    3.32    2.37
   3  13  -6    0.22    2.81
  -2 -13   6    4.96    1.39
   2 -13  -6    6.32    1.56
   2 -13  -6    5.34    1.91
  -2 -13   6    5.16    2.46
  -2  13   6    7.11    2.09
  -2  13   6    5.71    1.75
   2  13  -6    7.40    3.20
   2  13  -6    5.73    3.19
   1 -13  -6   17.06    2.43
   1 -13  -6   16.10    1.75
  -1 -13   6   17.47    2.57
  -1 -13   6   15.92    1.89
   1  13  -6   15.27    4.32
  -1  13   6   15.67    2.02
  -1  13   6   16.76    2.37
   1  13  -6   18.10    4.13
   1  13  -6   14.34    1.51
   0 -13  -6    4.44    2.18
   0 -13   6    4.70    1.88
   0 -13   6    4.00    1.43
   0 -13  -6    3.51    1.23
   0  13  -6    6.60    3.51
   0  13   6    4.05    1.89
  -1 -13  -6    0.16    1.08
   1 -13   6    0.38    1.01
  -1 -13  -6   -0.10    2.15
   1 -13   6    0.28    1.44
   1 -13   6    1.28    1.38
   1  13   6    1.52    2.11
   1  13   6   -0.62    3.96
  -1  13  -6   -3.00    4.40
  -2 -13  -6   13.30    1.66
   2 -13   6   13.36    1.93
   2 -13   6   13.52    1.94
  -2 -13  -6   17.27    3.18
   2  13   6   15.39    2.76
   2  13   6   10.71    3.22
  -2  13  -6   17.83    4.31
  -3 -13  -6    7.42    3.11
   3 -13   6    2.91    1.87
   3 -13   6    8.12    2.06
  -3  13  -6   18.36    5.57
   3  13   6   10.58    2.86
   3  13   6    4.62    3.11
   4 -13   6    2.18    2.22
  -4 -13  -6    6.66    3.41
  -4 -14   6    5.46    3.08
   4 -14  -6    2.10    1.75
  -4  14   6    7.79    4.22
  -3 -14   6    8.33    2.83
   3 -14  -6    5.92    1.80
   3 -14  -6    3.91    1.56
   3  14  -6    0.75    3.23
   3  14  -6    3.53    3.13
  -2 -14   6   -1.45    1.22
   2 -14  -6   -0.38    1.28
   2 -14  -6   -1.41    1.80
  -2 -14   6    2.24    2.38
   2  14  -6    1.57    3.18
   2  14  -6   -2.15    3.09
  -2  14   6    0.85    1.50
  -2  14   6    0.83    1.91
   1 -14  -6   34.85    2.43
   1 -14  -6   34.37    3.12
  -1 -14   6   32.66    2.94
  -1 -14   6   35.62    2.32
   1  14  -6   34.09    5.38
   1  14  -6   37.48    6.10
  -1  14   6   32.25    2.89
   1  14  -6   34.82    1.93
   0 -14   6    1.33    1.91
   0 -14  -6    1.60    2.31
   0 -14  -6    2.86    1.33
   0 -14   6    4.86    1.56
   0  14  -6    5.67    4.55
   0  14   6    2.43    2.04
  -1 -14  -6    9.54    2.80
  -1 -14  -6    7.72    1.46
   1 -14   6    8.45    1.53
   1 -14   6    6.19    1.67
   1 -14   6    9.53    1.81
   1  14   6    6.90    2.43
   1  14   6   10.08    4.80
  -1  14  -6    8.94    5.35
   2 -14   6   -0.40    1.57
  -2 -14  -6   -0.52    1.03
  -2 -14  -6    1.09    2.74
   2 -14   6    0.21    1.35
  -2  14  -6    4.12    3.96
   2  14   6    1.42    2.32
   2  14   6    2.04    3.08
  -3 -14  -6    5.47    3.22
   3 -14   6   -0.43    1.86
   3 -14   6    3.07    1.84
   3  14   6   -3.56    3.18
   3  14   6    4.76    2.67
   3 -15  -6   19.14    2.44
  -3 -15   6   28.64    4.26
   3 -15  -6   20.01    2.47
   3  15  -6   12.78    4.35
   3  15  -6   11.32    3.81
  -2 -15   6    6.01    1.56
   2 -15  -6    9.07    1.83
   2 -15  -6    8.16    2.28
  -2 -15   6    9.84    2.77
  -2  15   6   13.38    2.66
   2  15  -6    7.08    3.48
   2  15  -6    5.84    3.81
  -2  15   6   11.80    2.46
  -1 -15   6    0.58    1.47
   1 -15  -6    0.22    2.09
   1 -15  -6   -0.59    1.39
  -1 -15   6    0.48    2.11
   1  15  -6    2.46    3.87
  -1  15   6    1.73    2.00
   1  15  -6    2.72    4.41
   0 -15  -6    9.93    2.69
   0 -15  -6    9.08    1.60
   0 -15   6   12.15    2.31
   0 -15   6    9.81    1.83
   0  15   6   10.13    2.38
  -1 -15  -6   35.42    3.96
  -1 -15  -6   32.06    2.23
   1 -15   6   31.81    2.20
   1 -15   6   30.29    2.35
   1 -15   6   32.96    2.60
   1  15   6   42.12    8.35
   1  15   6   32.36    3.17
   2 -15   6   39.52    2.67
  -2 -15  -6   40.35    4.50
   2 -15   6   34.26    2.90
  -2 -15  -6   35.59    2.19
   2  15   6   40.15    3.46
   2  15   6   39.59    6.25
   3 -15   6    0.73    2.02
   3 -15   6    7.40    2.10
  -3 -15  -6    7.61    3.42
   3  15   6    9.09    2.93
   3 -16  -6    3.16    1.76
  -3 -16   6    9.46    2.93
   3 -16  -6    8.02    2.18
  -2 -16   6   -1.35    1.44
   2 -16  -6    1.66    1.57
  -2 -16   6    3.42    2.69
  -2  16   6    2.29    2.09
   2  16  -6    2.85    3.61
   2  16  -6   -5.09    3.71
  -1 -16   6    5.05    2.29
   1 -16  -6    3.15    1.58
  -1 -16   6    2.94    1.59
   1 -16  -6    3.62    2.28
   1  16  -6    5.43    4.54
   1  16  -6    5.36    3.76
  -1  16   6    4.92    2.24
   0 -16  -6   13.98    1.91
   0 -16   6   13.68    2.00
   0 -16   6   14.50    2.44
   0 -16  -6   14.25    3.00
   0  16   6   17.70    2.75
   1 -16   6    6.35    1.78
  -1 -16  -6    8.85    1.61
   1 -16   6    9.75    1.91
  -1 -16  -6    8.67    2.75
   1 -16   6    9.82    1.69
   1  16   6   14.58    4.97
  -1  16  -6   10.45    6.29
   1  16   6   10.90    2.51
   2 -16   6   16.25    2.31
  -2 -16  -6   17.70    3.38
  -2 -16  -6   15.34    1.98
   2 -16   6   17.55    2.19
   2  16   6   15.57    4.22
   2  16   6   20.68    3.01
   3 -16   6    4.95    2.00
  -3 -16  -6    7.37    3.60
   3  16   6   10.57    2.92
  -3 -17   6    6.70    3.09
   3 -17  -6    3.79    1.97
   3 -17  -6    0.31    1.68
   2 -17  -6    0.21    1.50
  -2 -17   6    1.86    2.67
  -2 -17   6   -3.35    1.43
   2  17  -6    0.79    3.85
  -2  17   6    0.30    2.10
   1 -17  -6    5.59    2.60
  -1 -17   6    8.64    2.58
  -1 -17   6    5.60    1.77
   1 -17  -6    7.89    1.86
  -1  17   6    7.30    2.36
   1  17  -6    3.82    3.81
   1  17  -6   11.43    4.82
   1 -17   6    0.70    1.31
  -1 -17  -6   -0.86    2.93
   1 -17   6   -1.98    1.62
  -1 -17  -6   -1.30    1.29
   1  17   6    7.75    4.53
   1  17   6    1.88    2.23
  -1  17  -6   -2.05    6.20
   2 -17   6    3.41    2.03
  -2 -17  -6   10.24    3.56
  -2 -17  -6    7.99    1.63
   2 -17   6    7.54    1.91
   2  17   6    7.37    4.40
   2  17   6    9.40    2.67
   3 -17   6   12.72    2.50
  -3 -17  -6   12.79    4.08
   3  17   6   14.86    3.20
   3 -18  -6   15.50    2.53
   3 -18  -6   15.43    2.49
  -3 -18   6   23.27    3.92
  -2 -18   6    5.36    2.96
   2 -18  -6   -0.87    1.61
   2  18  -6    1.26    4.34
  -2  18   6    0.48    2.24
  -1 -18   6   19.30    2.70
   1 -18  -6   23.62    3.69
  -1 -18   6   26.18    3.54
   1 -18  -6   24.81    2.68
  -1  18   6   27.17    3.21
   1  18  -6   16.57    4.46
   1 -18   6   -0.58    1.73
   1 -18   6    0.35    1.32
  -1 -18  -6   -1.75    1.44
  -1 -18  -6    0.72    2.83
  -1  18  -6    3.91    6.18
   1  18   6    3.94    2.43
   2 -18   6    0.85    1.60
   2 -18   6   -3.77    1.94
  -2 -18  -6   -0.09    1.44
  -2 -18  -6    1.85    3.44
  -2  18  -6   10.69    5.04
   2  18   6   -1.75    4.55
   2  18   6    5.17    2.55
  -2 -19   6    6.90    3.06
   2 -19  -6    4.37    1.99
   2  19  -6    1.52    4.71
  -2  19   6    9.40    2.73
   1 -19  -6   15.12    3.14
   1 -19  -6   13.93    2.18
  -1 -19   6   11.95    2.16
  -1 -19   6   19.52    3.23
  -1  19   6   19.22    3.08
   0 -19  -6   -0.72    1.60
   0 -19   6    2.20    2.31
   0 -19   6   -0.62    1.76
   0 -19  -6   -0.34    2.91
   0  19  -6   -8.46    9.38
   0  19   6    1.93    2.39
   1 -19   6   24.32    2.25
   1 -19   6   24.03    2.73
  -1 -19  -6   30.21    4.19
  -1 -19  -6   21.55    2.54
   1  19   6   31.11    3.69
  -1  19  -6   38.63    8.46
   2 -19   6    1.32    1.68
  -2 -19  -6    1.95    3.48
   2  19   6    5.67    2.54
   2  19   6   -1.93    5.01
   2 -20  -6   -2.97    1.84
  -2 -20   6    3.76    3.12
  -2  20   6    1.60    2.45
   2  20  -6   -1.05    5.33
  -1 -20   6    4.06    2.04
   1 -20  -6    8.24    2.19
  -1 -20   6   14.57    3.14
   1 -20  -6   10.29    3.13
  -1  20   6   10.92    2.81
   0 -20  -6   -0.46    2.97
   0 -20  -6   -1.08    1.65
   0 -20   6    4.84    2.48
   0 -20   6   -3.30    1.80
   0  20   6    4.14    2.63
   1 -20   6   21.30    2.85
  -1 -20  -6   20.95    2.62
  -1 -20  -6   28.03    4.12
   1 -20   6   25.58    2.46
   1  20   6   28.99    3.61
  -2 -20  -6    2.21    3.90
   2 -20   6    2.28    1.80
   2  20   6   -1.85    5.67
   2  20   6    6.08    2.73
   1 -21  -6    2.45    2.89
  -1 -21   6   -0.91    2.01
  -1 -21   6    7.82    3.03
   1 -21  -6    1.68    1.95
  -1  21   6   10.05    2.91
   0 -21   6    4.94    2.54
   0 -21   6   -3.40    1.96
   0 -21  -6    0.96    1.79
   0 -21  -6    0.36    3.12
   0  21   6    4.34    2.55
  -1 -21  -6    2.18    3.58
   1 -21   6    1.03    1.54
   1  21   6    4.45    2.79
   0 -22   6    6.17    2.74
   0 -22  -6   -0.05    3.31
   0 -22  -6   -3.11    1.93
   0 -22   6   -4.20    2.14
   0  22   6    3.28    2.73
   5   0  -7   -1.48    1.85
  -5   0   7   -1.27    4.18
   4   0  -7   -0.67    1.30
   4   0  -7   -0.74    1.16
  -4   0   7    0.19    1.46
  -4   0   7   -0.33    2.53
   3   0  -7   32.29    1.67
   3   0  -7   31.91    2.54
  -3   0   7   28.17    2.17
  -3   0   7   31.56    3.38
  -2   0   7    0.21    1.26
   2   0  -7   -0.29    0.69
   2   0  -7   -0.06    0.51
  -2   0   7   -0.04    0.98
  -2   0   7    0.37    0.68
   1   0  -7  105.47    3.76
  -1   0   7  106.06    2.26
  -1   0   7  102.77    2.91
  -1   0   7  102.17    2.33
   1   0  -7  107.15    2.94
   0   0   7    1.38    1.07
   0   0  -7    4.36    1.90
   0   0   7    0.46    0.95
   0   0   7   -0.70    0.85
   1   0   7    0.14    0.87
  -1   0  -7   -0.51    1.34
  -1   0  -7   -0.67    0.82
   1   0   7   -0.08    0.43
   1   0   7    1.66    1.13
  -2   0  -7   -0.34    1.42
   2   0   7    0.75    1.29
   2   0   7   -0.01    0.67
  -2   0  -7    0.00    0.94
   2   0   7   -0.05    0.89
   3   0   7   -0.66    1.02
  -3   0  -7   -0.42    1.85
   3   0   7    1.04    1.74
   3   0   7    0.27    1.07
  -4   0  -7    3.77    3.36
   4   0   7   -1.79    2.24
   4   0   7   -0.79    1.44
  -5   0  -7    9.69    4.79
  -5  -1   7   20.71    5.85
   5  -1  -7   13.26    2.82
   5   1  -7   11.44    2.74
   4  -1  -7    0.35    1.36
   4  -1  -7    0.42    1.23
  -4  -1   7    2.13    1.52
  -4  -1   7    0.85    2.73
  -4   1   7   -0.52    2.47
   4   1  -7   -1.43    1.25
   4   1  -7    0.07    1.44
  -3  -1   7   18.14    3.11
   3  -1  -7   18.14    1.02
  -3  -1   7   18.02    2.08
   3  -1  -7   18.26    2.10
   3  -1  -7   17.29    1.37
  -3   1   7   17.07    1.88
  -3   1   7   17.86    2.95
   3   1  -7   17.19    1.33
   3   1  -7   17.56    2.19
   2  -1  -7   27.08    1.25
  -2  -1   7   27.20    2.59
  -2  -1   7   26.02    1.78
  -2  -1   7   28.89    1.29
   2  -1  -7   26.44    1.87
  -2   1   7   28.97    1.31
   2   1  -7   27.40    1.10
  -2   1   7   26.39    2.43
   2   1  -7   28.00    1.89
  -2   1   7   27.70    1.74
  -1  -1   7  370.85    7.20
  -1  -1   7  366.08    5.83
   1  -1  -7  378.04    9.44
  -1  -1   7  368.84    6.13
  -1   1   7  374.03    6.47
  -1   1   7  367.02    5.92
   1   1  -7  376.95    8.05
   1   1  -7  367.98    9.62
  -1   1   7  373.77    7.22
   0  -1   7   17.91    1.35
   0  -1  -7   23.20    2.57
   0  -1   7   17.72    1.47
   0  -1   7   20.43    1.27
   0   1   7   17.55    1.66
   0   1  -7   23.79    3.19
   0   1   7   18.28    1.58
   0   1   7   16.20    1.37
   1  -1   7   98.08    2.65
   1  -1   7   96.88    2.36
   1  -1   7   95.68    2.66
  -1  -1  -7   95.20    2.62
   1  -1   7   92.38    2.57
  -1  -1  -7   93.55    3.54
  -1   1  -7   94.76    3.83
   1   1   7   96.57    2.32
   1   1   7   96.78    2.81
   1   1   7   96.68    2.67
  -2  -1  -7    0.29    1.05
   2  -1   7    0.68    0.94
  -2  -1  -7    0.05    1.28
   2  -1   7    0.57    0.68
   2  -1   7    1.82    1.30
   2   1   7    0.58    0.85
  -2   1  -7    0.49    0.88
   2   1   7    1.37    1.37
  -2   1  -7    0.24    1.50
   2   1   7    0.40    0.73
  -3  -1  -7   12.15    1.92
   3  -1   7   14.28    2.21
   3  -1   7   13.20    1.99
   3  -1   7   13.91    1.76
  -3  -1  -7   11.67    2.47
  -3   1  -7   16.89    2.97
   3   1   7   16.79    2.49
   3   1   7   13.84    1.60
   3   1   7   12.32    2.03
   4  -1   7    1.85    2.22
   4  -1   7    2.38    1.60
  -4  -1  -7    7.68    3.41
  -4   1  -7    6.39    3.56
   4   1   7    2.21    2.46
   4   1   7    1.99    1.68
   5  -1   7    6.37    3.31
   5  -1   7   13.00    2.88
   5   1   7   12.80    3.12
   5   1   7    6.81    3.54
   5  -2  -7   44.48    4.45
  -5  -2   7   44.03    8.00
   5   2  -7   42.35    4.68
  -5   2   7   46.97    7.00
  -4  -2   7    0.05    2.75
   4  -2  -7    0.54    1.34
  -4  -2   7    0.97    1.59
   4  -2  -7    0.06    1.20
  -4   2   7    1.71    2.53
   4   2  -7    0.09    1.49
   3  -2  -7  166.12    4.08
  -3  -2   7  161.43    4.63
   3  -2  -7  163.72    3.12
   3  -2  -7  163.27    5.59
  -3  -2   7  165.37    6.86
   3   2  -7  162.10    3.76
   3   2  -7  167.90    5.74
  -3   2   7  158.61    6.54
  -3   2   7  158.63    4.29
  -2  -2   7    0.91    1.12
  -2  -2   7    0.85    0.67
   2  -2  -7    1.30    0.67
  -2   2   7    0.41    1.07
  -2   2   7    1.76    1.25
   2   2  -7    1.65    0.90
  -2   2   7    0.54    0.74
   2   2  -7    1.21    0.53
  -1  -2   7    2.98    0.40
  -1  -2   7    2.86    1.12
  -1  -2   7    2.78    0.81
  -1   2   7    3.20    0.88
  -1   2   7    1.59    0.83
  -1   2   7    2.73    1.06
  -1   2   7    3.26    1.09
   1   2  -7    2.47    0.77
   1   2  -7    3.48    1.36
   0  -2   7    2.82    0.79
   0  -2   7    0.27    0.96
   0  -2   7    1.02    0.90
   0   2  -7    5.08    2.29
   0   2   7    0.36    0.94
   0   2   7    0.75    1.32
   0   2   7    0.89    1.22
  -1  -2  -7  616.56   10.99
  -1  -2  -7  611.24   14.19
   1  -2   7  633.21   10.64
   1  -2   7  601.76   10.68
   1  -2   7  613.70    9.21
   1   2   7  579.76   10.62
   1   2   7  622.11    9.23
  -1   2  -7  606.82   14.89
   1   2   7  613.45   12.55
   2  -2   7   15.67    1.51
   2  -2   7   16.63    1.75
   2  -2   7   14.65    1.48
  -2  -2  -7   14.64    2.14
  -2  -2  -7   14.36    1.75
   2   2   7   17.00    2.12
  -2   2  -7   13.68    2.63
   2   2   7   14.22    1.65
   2   2   7   15.49    1.42
  -2   2  -7   16.11    1.17
  -3  -2  -7  191.50    7.15
   3  -2   7  195.35    5.46
  -3  -2  -7  183.07    4.70
   3  -2   7  197.22    6.21
   3  -2   7  191.52    4.04
   3   2   7  191.60    5.50
  -3   2  -7  199.10    7.87
   3   2   7  191.52    3.82
   3   2   7  186.25    6.14
  -4  -2  -7    1.54    2.57
   4  -2   7   -1.90    2.04
   4  -2   7   -0.42    1.42
   4   2   7   -1.90    2.34
  -4   2  -7    3.40    3.41
  -5  -2  -7    4.39    3.91
  -5   2  -7   12.69    5.53
  -5  -3   7   23.98    6.39
   5  -3  -7   13.40    2.69
  -5   3   7   19.05    5.28
   5   3  -7   10.68    2.87
   4  -3  -7    5.29    1.67
  -4  -3   7    7.16    3.38
   4  -3  -7    8.70    1.64
  -4  -3   7    8.86    2.02
   4   3  -7    5.67    2.02
  -4   3   7   10.07    3.18
   3  -3  -7    7.06    1.42
  -3  -3   7    8.50    2.43
   3  -3  -7    8.49    1.29
  -3  -3   7    9.25    1.83
   3  -3  -7    7.39    1.02
   3   3  -7    7.82    1.25
  -3   3   7    8.02    2.08
   3   3  -7    7.67    1.70
  -3   3   7    8.19    1.57
  -2  -3   7   85.15    2.99
  -2  -3   7   85.95    1.99
  -2   3   7   88.31    3.90
   2   3  -7   92.29    3.49
  -2   3   7   87.54    2.80
  -2   3   7   88.09    2.26
   2   3  -7   84.01    3.98
   2   3  -7   87.77    1.95
  -2   3   7   90.04    2.64
  -1  -3   7   10.19    1.13
  -1  -3   7    8.46    1.43
   1   3  -7   11.31    2.06
  -1   3   7   10.00    1.16
   1   3  -7   12.55    1.53
  -1   3   7    9.76    1.51
  -1   3   7    9.67    1.21
  -1   3   7    9.51    1.48
   0  -3  -7   69.84    2.66
   0  -3   7   59.72    2.07
   0  -3   7   62.53    1.64
   0  -3   7   61.66    1.93
   0   3   7   63.35    2.00
   0   3   7   59.95    2.40
   0   3  -7   62.40    4.52
   1  -3   7   46.15    1.80
  -1  -3  -7   43.77    2.00
   1  -3   7   47.21    1.81
  -1  -3  -7   43.15    2.06
   1  -3   7   46.76    1.67
   1   3   7   42.42    2.11
   1   3   7   44.04    1.78
   1   3   7   45.06    2.00
  -1   3  -7   44.15    3.42
   2  -3   7   11.52    1.60
   2  -3   7   10.56    1.37
  -2  -3  -7   11.18    1.82
  -2  -3  -7    8.99    1.81
  -2   3  -7   10.56    2.28
   2   3   7   12.33    1.83
   2   3   7   12.15    1.71
   2   3   7   10.67    1.32
  -2   3  -7   10.30    0.97
   3  -3   7    2.56    1.31
  -3  -3  -7    3.52    1.71
   3  -3   7    2.82    1.77
   3  -3   7    2.61    1.15
  -3  -3  -7    3.58    1.91
   3   3   7    2.41    1.40
   3   3   7    4.23    2.28
  -3   3  -7    3.07    2.53
   4  -3   7   14.25    2.77
   4  -3   7   13.90    2.69
  -4  -3  -7   17.36    3.46
  -4   3  -7   22.43    4.53
   4   3   7   10.75    2.38
   4   3   7   12.29    2.98
   5  -4  -7    2.13    1.84
   5  -4  -7    1.74    1.94
   5   4  -7   -2.83    2.18
  -5   4   7    1.32    3.96
   4  -4  -7   -0.07    1.27
  -4  -4   7    3.00    1.87
   4  -4  -7    0.51    1.29
  -4   4   7    1.22    2.53
   4   4  -7    0.23    1.74
   3  -4  -7   10.21    1.36
  -3  -4   7   12.83    2.07
   3  -4  -7   10.07    1.17
   3   4  -7    9.85    2.20
   3   4  -7   11.25    1.98
  -3   4   7   11.36    2.41
   3   4  -7    9.24    1.47
  -3   4   7   11.11    1.66
  -2  -4   7    8.12    1.54
  -2  -4   7    7.84    0.84
   2   4  -7    6.52    1.29
  -2   4   7    9.45    1.61
   2   4  -7    7.05    0.84
  -2   4   7    8.35    1.27
  -2   4   7    8.26    1.04
   2   4  -7    8.72    1.82
  -2   4   7    8.39    1.89
  -1  -4   7   32.23    1.91
  -1  -4   7   32.69    1.43
   1   4  -7   34.35    2.19
   1   4  -7   35.33    2.82
  -1   4   7   32.99    1.97
  -1   4   7   31.56    1.93
  -1   4   7   31.77    1.66
  -1   4   7   30.85    1.55
   0  -4  -7   45.64    2.09
   0  -4   7   49.48    1.80
   0  -4   7   47.24    1.97
   0  -4   7   47.89    1.38
   0  -4  -7   52.94    2.01
   0   4   7   48.30    1.83
   0   4  -7   48.66    4.08
   0   4   7   43.72    2.23
  -1  -4  -7   20.89    1.42
   1  -4   7   23.50    1.58
  -1  -4  -7   22.29    1.73
   1  -4   7   21.77    1.31
   1  -4   7   23.18    1.37
   1   4   7   21.51    1.41
   1   4   7   22.70    1.91
  -1   4  -7   23.93    3.18
   1   4   7   22.20    1.92
   2  -4   7   -0.21    1.05
  -2  -4  -7   -0.59    0.99
  -2  -4  -7    0.79    1.42
   2  -4   7   -0.27    1.08
  -2   4  -7   -0.45    0.60
   2   4   7    0.61    1.03
   2   4   7   -0.01    0.82
  -2   4  -7   -0.82    1.88
   2   4   7    2.10    1.84
   3  -4   7    1.85    1.06
   3  -4   7    1.74    1.66
  -3  -4  -7    1.77    1.80
  -3  -4  -7    3.06    1.78
   3  -4   7    1.98    1.37
   3   4   7    4.28    2.28
  -3   4  -7    0.24    2.48
   3   4   7    1.58    1.46
  -4  -4  -7    3.44    2.42
   4  -4   7    2.65    1.54
   4  -4   7    0.76    2.16
   4   4   7    0.23    2.57
  -4   4  -7    7.46    3.80
   4   4   7    0.19    1.87
   5  -5  -7    5.50    2.05
   5  -5  -7    6.41    2.30
  -5   5   7   12.13    5.06
   4  -5  -7    8.17    1.70
  -4  -5   7   11.22    2.26
   4  -5  -7    6.39    1.77
   4   5  -7   10.06    2.84
  -4   5   7    8.34    3.28
   4   5  -7    5.55    2.23
   3  -5  -7    5.80    1.31
  -3  -5   7    4.18    1.91
   3  -5  -7    5.37    0.98
   3   5  -7    5.24    1.46
   3   5  -7    4.75    1.65
   3   5  -7    5.81    2.11
  -3   5   7    5.68    1.60
  -3   5   7    4.85    1.97
  -2  -5   7   47.14    2.52
  -2  -5   7   45.09    1.49
   2   5  -7   45.56    1.38
   2   5  -7   42.57    3.16
  -2   5   7   45.41    2.23
  -2   5   7   43.29    2.83
  -2   5   7   43.11    2.14
   2   5  -7   45.07    2.81
  -2   5   7   43.33    1.85
  -1  -5   7  120.66    2.62
  -1  -5   7  120.51    3.45
  -1   5   7  125.06    3.54
  -1   5   7  122.49    2.88
  -1   5   7  122.52    3.90
   1   5  -7  122.73    5.05
  -1   5   7  122.39    3.25
   1   5  -7  119.87    4.03
   0  -5   7   96.05    2.12
   0  -5   7   96.30    2.73
   0  -5  -7   97.51    2.98
   0  -5   7   97.59    2.45
   0   5   7   93.96    3.00
   0   5  -7   93.65    5.43
   0   5   7   97.22    2.52
  -1  -5  -7   55.10    2.42
   1  -5   7   57.10    1.83
   1  -5   7   57.21    2.07
   1  -5   7   57.10    1.95
  -1  -5  -7   57.72    1.98
   1   5   7   56.63    2.75
  -1   5  -7   52.72    4.07
   1   5   7   57.71    2.81
   1   5   7   56.54    1.92
  -2  -5  -7    6.26    1.72
   2  -5   7    5.26    1.31
   2  -5   7    4.00    1.17
  -2  -5  -7    4.84    1.25
   2   5   7    5.62    1.03
  -2   5  -7    4.54    0.64
  -2   5  -7    3.04    2.34
   2   5   7    4.90    1.35
   2   5   7    6.00    2.00
   3  -5   7   12.62    1.65
  -3  -5  -7    9.69    2.11
   3  -5   7   11.71    1.99
  -3  -5  -7   10.71    2.20
   3   5   7    9.22    1.89
   3   5   7   16.27    2.77
  -3   5  -7   12.27    3.27
   4  -5   7    7.80    2.38
   4  -5   7    8.37    1.92
  -4  -5  -7    8.83    2.60
   4   5   7    8.33    2.97
  -4   5  -7   15.01    4.39
   4   5   7    4.71    2.18
   5  -6  -7   12.18    2.42
   5  -6  -7    8.88    2.43
   5   6  -7    4.63    2.84
  -5   6   7   19.86    5.52
   4  -6  -7    1.12    1.28
   4  -6  -7    0.36    1.35
  -4  -6   7    2.39    2.02
  -4   6   7    0.84    2.80
   4   6  -7   -1.16    1.85
   4   6  -7    2.73    2.76
  -3  -6   7   45.92    3.17
   3  -6  -7   47.13    2.32
   3  -6  -7   47.25    1.98
  -3   6   7   48.13    3.87
   3   6  -7   50.77    3.74
  -3   6   7   48.48    2.66
   3   6  -7   48.81    4.02
  -2  -6   7    8.11    1.70
  -2  -6   7    7.76    0.95
   2   6  -7    7.01    1.89
  -2   6   7   10.29    1.64
   2   6  -7    8.65    1.68
   2   6  -7   11.22    0.93
  -2   6   7    8.80    1.50
  -2   6   7    6.92    1.56
  -1  -6   7   11.39    1.68
   1  -6  -7   12.58    1.60
  -1  -6   7   12.85    1.31
  -1   6   7   12.07    1.39
  -1   6   7   12.64    1.42
   1   6  -7   17.13    2.95
  -1   6   7   10.13    1.54
   1   6  -7   17.70    2.66
   0  -6   7    4.55    1.04
   0  -6   7    3.78    1.12
   0  -6  -7    6.90    1.45
   0  -6   7    5.26    0.69
   0   6   7    5.80    1.14
   0   6   7    5.41    1.57
   0   6  -7    7.96    2.90
  -1  -6  -7   41.85    2.35
  -1  -6  -7   41.67    1.53
   1  -6   7   40.46    1.69
   1  -6   7   42.88    1.93
   1  -6   7   41.92    1.61
   1   6   7   42.27    1.84
   1   6   7   41.35    2.64
  -1   6  -7   40.00    3.68
   1   6   7   42.89    2.83
   2  -6   7    6.08    1.30
   2  -6   7    5.71    1.32
  -2  -6  -7    5.94    1.29
  -2  -6  -7    5.02    1.78
  -2   6  -7    4.56    2.49
   2   6   7    5.64    1.52
   2   6   7    5.12    1.03
   2   6   7    8.77    2.24
   3  -6   7   53.59    2.62
  -3  -6  -7   52.05    3.36
  -3  -6  -7   51.50    3.57
   3  -6   7   52.38    2.93
   3   6   7   53.04    3.71
  -3   6  -7   53.00    5.64
   3   6   7   52.16    3.72
   4  -6   7   -2.07    1.82
   4  -6   7    1.52    1.41
  -4  -6  -7    1.74    2.10
  -4   6  -7    6.47    4.08
   4   6   7   -2.63    1.96
   4   6   7    0.54    2.71
   4  -7  -7   19.27    2.26
  -4  -7   7   23.38    3.19
  -4   7   7   24.75    4.47
   4   7  -7   22.89    5.11
   3  -7  -7   41.11    2.01
   3  -7  -7   40.68    2.28
  -3  -7   7   38.33    3.14
  -3   7   7   40.41    3.71
   3   7  -7   42.02    4.13
   3   7  -7   44.84    3.84
  -3   7   7   41.08    2.61
  -2  -7   7   99.96    3.70
  -2  -7   7   98.81    2.39
   2  -7  -7  104.00    2.73
   2  -7  -7  104.16    3.28
   2   7  -7  102.66    2.07
   2   7  -7  100.16    4.92
  -2   7   7  100.04    4.25
   2   7  -7  101.33    4.44
  -2   7   7  100.89    3.34
  -1  -7   7   13.58    1.40
   1  -7  -7   13.44    1.70
  -1  -7   7   14.49    1.83
  -1  -7   7   13.39    0.51
  -1   7   7   15.58    1.70
  -1   7   7   14.07    1.48
   1   7  -7   17.03    2.87
  -1   7   7   13.56    1.40
   1   7  -7   16.61    3.13
   0  -7  -7   13.60    1.82
   0  -7   7   11.99    0.84
   0  -7   7   13.68    1.48
   0  -7   7   10.31    1.44
   0   7   7   12.19    1.48
   0   7   7   12.56    1.94
   0   7  -7   13.08    3.08
   1  -7   7   10.52    1.32
   1  -7   7    8.89    1.18
   1  -7   7    8.52    1.06
  -1  -7  -7    8.19    1.60
   1   7   7    8.67    1.79
  -1   7  -7   12.32    2.83
   1   7   7    9.46    1.18
   1   7   7    8.31    1.77
   2  -7   7    1.84    1.24
  -2  -7  -7    2.24    1.85
   2  -7   7    1.76    1.19
  -2  -7  -7    2.09    1.11
   2   7   7    5.05    2.31
   2   7   7    2.31    1.64
  -2   7  -7    0.88    2.60
   2   7   7    2.25    0.97
  -3  -7  -7    2.12    1.60
   3  -7   7    1.04    1.44
   3  -7   7    3.79    1.69
  -3  -7  -7    2.51    2.08
   3   7   7    3.40    2.57
   3   7   7    1.10    1.80
  -3   7  -7    1.47    2.98
   4  -7   7    4.53    2.21
  -4  -7  -7    6.92    2.56
   4  -7   7    6.83    1.78
  -4   7  -7   16.82    4.93
   4   7   7    2.65    2.34
   4   7   7    2.81    2.84
   4  -8  -7   19.93    2.21
  -4  -8   7   22.53    3.33
   4   8  -7   15.47    3.12
   4   8  -7   22.48    4.28
  -4   8   7   23.27    4.92
   3  -8  -7   -0.28    1.15
   3  -8  -7    1.21    1.40
   3  -8  -7    0.08    1.00
  -3  -8   7   -0.22    1.95
   3   8  -7    2.37    2.05
  -3   8   7   -0.28    1.79
   3   8  -7   -0.30    2.11
  -2  -8   7   20.66    2.52
  -2  -8   7   22.54    1.51
   2  -8  -7   24.14    1.73
   2  -8  -7   24.11    2.21
  -2   8   7   23.30    2.14
   2   8  -7   25.10    3.32
   2   8  -7   27.91    3.56
  -2   8   7   23.62    2.40
   2   8  -7   24.59    1.04
   1  -8  -7   13.99    1.79
  -1  -8   7   15.02    1.38
  -1  -8   7   11.80    1.94
  -1   8   7   13.41    1.44
  -1   8   7   12.44    1.78
  -1   8   7   13.93    1.58
   1   8  -7   13.38    2.66
   1   8  -7   13.14    2.36
   0  -8  -7    1.92    1.30
   0  -8   7    1.66    1.13
   0  -8   7    2.55    0.99
   0  -8   7    1.30    0.60
   0   8  -7    3.42    2.76
   0   8   7    1.98    1.08
   0   8   7    2.32    1.57
   1  -8   7    8.74    1.11
   1  -8   7    8.64    1.26
   1  -8   7    9.67    1.40
  -1  -8  -7    9.96    1.88
  -1   8  -7   14.58    3.11
   1   8   7   10.18    1.26
   1   8   7   10.55    2.12
   1   8   7    9.79    2.13
   2  -8   7   26.94    1.95
   2  -8   7   27.37    2.09
  -2  -8  -7   28.09    2.97
  -2  -8  -7   26.30    2.11
   2   8   7   29.62    3.18
   2   8   7   26.88    1.70
  -2   8  -7   26.62    4.34
   2   8   7   32.55    3.32
  -3  -8  -7    0.12    1.55
  -3  -8  -7    2.17    2.26
   3  -8   7    1.21    1.44
   3  -8   7   -0.13    1.48
   3   8   7    0.42    1.91
   3   8   7    4.30    2.71
  -3   8  -7    1.55    3.05
  -4  -8  -7    5.93    2.45
   4  -8   7    1.94    2.14
   4   8   7    1.73    3.00
  -4   8  -7    8.10    4.64
   4   8   7   -1.90    2.29
   4  -9  -7   12.93    2.08
   4   9  -7   10.70    2.95
   4   9  -7   17.79    4.13
   3  -9  -7   -0.16    1.21
  -3  -9   7    1.07    2.09
   3  -9  -7    0.07    1.02
  -3   9   7    0.67    1.85
   3   9  -7   -0.23    2.14
   3   9  -7    0.42    2.25
  -2  -9   7  161.34    5.03
   2  -9  -7  166.64    4.45
  -2  -9   7  163.54    3.40
   2  -9  -7  162.40    3.87
  -2   9   7  157.84    5.67
  -2   9   7  161.42    4.65
   2   9  -7  162.39    6.98
   2   9  -7  158.14    6.17
  -1  -9   7   10.89    1.43
   1  -9  -7   11.73    1.87
  -1  -9   7   14.75    2.00
   1   9  -7   11.39    0.85
   1   9  -7   12.19    2.59
  -1   9   7   10.78    1.68
  -1   9   7   10.89    1.41
   1   9  -7   12.97    2.87
  -1   9   7   11.42    1.47
   0  -9  -7  250.82    5.94
   0  -9   7  250.77    4.85
   0  -9   7  260.67    4.92
   0  -9   7  257.08    5.58
   0   9  -7  228.38    8.90
   0   9   7  254.84    4.98
   0   9   7  251.43    5.83
  -1  -9  -7   16.06    2.56
   1  -9   7   15.83    1.48
   1  -9   7   15.59    1.39
   1  -9   7   17.11    1.83
   1   9   7   14.94    2.24
   1   9   7   20.15    3.93
   1   9   7   15.96    1.72
  -1   9  -7   18.29    3.41
  -2  -9  -7    2.53    2.25
   2  -9   7    1.86    1.45
   2  -9   7    2.03    1.23
   2   9   7    2.50    0.95
   2   9   7    4.70    2.08
   2   9   7    1.80    1.11
   2   9   7    2.05    2.33
  -2   9  -7   -1.12    2.81
  -3  -9  -7   -1.02    2.19
   3  -9   7   -0.85    1.46
   3  -9   7   -0.10    1.46
   3   9   7   -0.27    2.12
   3   9   7    1.55    2.64
  -3   9  -7    1.60    3.28
  -4  -9  -7   30.58    3.54
   4  -9   7   25.45    3.06
   4   9   7   25.92    3.83
   4   9   7   18.65    3.50
   4 -10  -7    2.50    1.57
  -4 -10   7    6.17    2.64
   4  10  -7    2.47    3.25
  -4  10   7    6.85    3.60
   4  10  -7   -0.94    2.60
  -3 -10   7    5.23    2.37
   3 -10  -7    6.75    1.37
   3 -10  -7    6.53    1.59
   3  10  -7    6.78    2.88
   3  10  -7    5.45    2.61
  -3  10   7    7.75    2.34
   2 -10  -7   25.61    1.87
  -2 -10   7   25.40    1.71
   2 -10  -7   26.35    2.36
  -2 -10   7   23.17    2.63
   2  10  -7   28.75    4.07
  -2  10   7   24.18    2.45
  -2  10   7   23.57    2.59
   2  10  -7   34.24    4.31
   1 -10  -7    7.58    1.73
   1 -10  -7    5.44    1.21
  -1 -10   7    6.09    1.86
  -1 -10   7    5.21    1.25
   1  10  -7    6.55    3.07
   1  10  -7    5.65    0.91
   1  10  -7    5.93    2.76
  -1  10   7    5.88    1.82
  -1  10   7    5.06    1.13
   0 -10   7    7.64    1.32
   0 -10   7    7.49    1.53
   0 -10  -7   11.74    2.04
   0 -10   7    7.48    0.90
   0  10   7    8.39    1.95
   0  10  -7   10.91    3.46
   0  10   7    7.84    1.37
   1 -10   7    6.79    1.48
   1 -10   7    5.56    1.27
  -1 -10  -7    6.33    1.92
   1 -10   7    5.90    1.14
   1  10   7    6.02    1.30
   1  10   7    6.37    2.06
   1  10   7    5.68    2.86
  -1  10  -7    7.92    3.43
   2 -10   7    1.60    1.45
   2 -10   7    1.26    1.22
  -2 -10  -7    1.50    2.40
   2  10   7    2.70    2.51
  -2  10  -7    0.04    3.00
   2  10   7    2.13    1.20
   2  10   7    4.76    2.40
   3 -10   7   12.58    2.12
   3 -10   7    9.52    1.88
  -3 -10  -7   13.22    2.86
   3  10   7   14.67    3.01
  -3  10  -7   18.56    4.41
   3  10   7    9.70    2.74
  -4 -10  -7    0.95    2.68
   4 -10   7   -0.97    1.93
  -4  10  -7   11.89    5.61
   4  10   7   -1.73    2.92
  -4 -11   7   17.85    3.17
   4 -11  -7   13.15    2.25
   4  11  -7    9.50    3.73
   3 -11  -7    3.20    1.30
  -3 -11   7    4.19    2.37
   3 -11  -7    3.20    1.54
   3  11  -7    3.21    2.75
   3  11  -7    2.39    2.68
  -3  11   7    4.00    2.17
  -2 -11   7    3.04    1.25
   2 -11  -7    3.31    1.78
   2 -11  -7    2.86    1.24
  -2 -11   7    1.89    2.13
  -2  11   7    2.34    1.92
   2  11  -7    3.26    2.82
  -2  11   7    3.53    1.56
   2  11  -7    5.61    2.79
  -1 -11   7    0.86    1.21
  -1 -11   7    0.06    1.60
   1 -11  -7    1.18    1.68
   1 -11  -7    0.20    1.08
  -1  11   7   -0.12    1.73
   1  11  -7    0.10    0.78
   1  11  -7    3.17    3.22
  -1  11   7    0.38    0.90
   1  11  -7    3.28    3.22
   0 -11  -7    5.51    1.75
   0 -11   7    6.79    1.44
   0 -11   7    6.90    0.98
   0 -11   7    6.09    1.70
   0  11   7    6.71    1.99
   0  11  -7   10.35    3.67
   1 -11   7    0.27    0.90
  -1 -11  -7    1.73    2.11
   1 -11   7    0.99    1.17
   1 -11   7    0.75    1.24
  -1  11  -7   -2.81    3.61
   1  11   7    5.97    3.17
   1  11   7    0.82    1.26
   1  11   7   -0.24    2.02
   2 -11   7    1.07    1.26
  -2 -11  -7   -0.39    2.39
   2 -11   7    1.84    1.58
   2  11   7    4.00    2.49
   2  11   7    3.13    2.61
  -2  11  -7   -1.51    3.32
  -3 -11  -7    1.45    2.57
   3 -11   7    0.94    1.56
   3 -11   7   -0.59    1.62
   3  11   7   -1.64    2.40
   3  11   7    2.57    2.76
  -3  11  -7    4.67    4.07
  -4 -11  -7    2.48    2.81
   4 -11   7   -0.36    2.06
  -4  11  -7   14.50    5.94
  -4 -12   7   39.17    4.44
   4 -12  -7   31.96    2.83
   4  12  -7   34.50    5.29
  -4  12   7   39.78    5.46
   3 -12  -7    0.66    1.30
  -3 -12   7    4.01    2.51
   3 -12  -7    2.00    1.49
  -3  12   7    2.15    2.06
   3  12  -7    0.30    2.65
   3  12  -7   -0.79    2.75
   2 -12  -7   11.17    2.06
  -2 -12   7   10.04    2.49
  -2 -12   7   10.64    1.46
   2 -12  -7   10.37    1.63
   2  12  -7   11.79    3.52
  -2  12   7   12.29    2.38
  -2  12   7    9.98    2.30
   2  12  -7   13.38    3.21
   1 -12  -7   14.27    1.80
  -1 -12   7   13.47    1.79
  -1 -12   7   14.32    2.32
   1 -12  -7   16.07    2.55
   1  12  -7   17.30    4.22
   1  12  -7   18.01    4.03
  -1  12   7   15.31    1.76
   1  12  -7   14.35    1.29
  -1  12   7   17.61    2.44
   0 -12   7   54.37    2.80
   0 -12   7   58.24    2.58
   0 -12  -7   57.80    2.47
   0 -12   7   58.00    2.04
   0 -12  -7   56.58    3.17
   0  12  -7   61.51    6.42
   0  12   7   51.74    3.10
   1 -12   7    2.22    1.42
  -1 -12  -7    2.09    2.21
   1 -12   7    2.11    1.07
   1 -12   7    2.45    1.39
  -1 -12  -7    1.78    1.06
   1  12   7    3.41    3.54
  -1  12  -7    3.40    3.99
   1  12   7    0.05    1.91
  -2 -12  -7  142.05    5.54
   2 -12   7  142.83    4.41
  -2 -12  -7  142.53    3.53
   2 -12   7  137.68    4.10
  -2  12  -7  155.34    8.46
   2  12   7  130.47    6.71
   2  12   7  137.68    5.07
   3 -12   7    0.85    1.64
   3 -12   7   -3.43    1.59
  -3 -12  -7   -0.24    2.73
  -3  12  -7    5.37    4.80
   3  12   7   -1.53    2.67
   3  12   7    3.52    2.73
  -4 -12  -7   14.38    3.55
   4 -12   7    8.11    2.54
   4  12   7    2.57    3.42
   4 -13  -7    3.06    1.79
  -4 -13   7    8.43    3.09
   4  13  -7   -1.21    3.55
  -4  13   7    8.71    4.20
   3 -13  -7    2.22    1.61
  -3 -13   7    6.00    2.62
   3 -13  -7    1.51    1.46
   3  13  -7    1.41    3.28
  -3  13   7    4.79    2.33
   3  13  -7    0.11    2.82
   2 -13  -7   90.99    3.33
   2 -13  -7   88.86    3.73
  -2 -13   7   92.50    4.41
  -2 -13   7   88.73    2.95
   2  13  -7   82.77    6.18
   2  13  -7   81.74    6.21
  -2  13   7   92.38    4.41
  -2  13   7   90.78    4.03
  -1 -13   7   26.66    2.12
   1 -13  -7   30.41    2.22
   1 -13  -7   30.42    2.97
  -1 -13   7   25.39    3.05
   1  13  -7   25.94    1.61
   1  13  -7   28.85    4.97
  -1  13   7   29.01    2.86
  -1  13   7   29.98    2.46
   1  13  -7   34.25    5.97
   0 -13   7   96.35    3.26
   0 -13  -7   95.55    4.24
   0 -13   7   94.22    2.78
   0 -13   7   93.60    3.62
   0 -13  -7   97.44    3.20
   0  13  -7   93.31    6.98
   0  13   7   90.31    3.77
   1 -13   7    8.54    1.46
   1 -13   7    8.20    1.74
   1 -13   7    8.35    1.68
  -1 -13  -7    7.13    2.48
  -1 -13  -7    7.50    1.41
  -1  13  -7    7.35    4.83
   1  13   7    7.42    2.43
   1  13   7    8.23    4.36
   2 -13   7    1.54    1.58
   2 -13   7    2.18    1.42
  -2 -13  -7    2.37    2.76
  -2 -13  -7    2.06    1.12
   2  13   7    5.04    2.51
  -2  13  -7    4.80    3.96
   2  13   7    3.72    2.91
   3 -13   7    1.45    1.70
   3 -13   7   -0.74    1.88
  -3 -13  -7    3.50    3.00
  -3  13  -7   11.67    5.44
   3  13   7   -4.20    2.93
   3  13   7    6.14    2.86
   4 -13   7   16.55    2.95
  -4 -13  -7   19.92    3.92
   4  13   7   11.69    3.66
  -4 -14   7    9.05    3.26
   4 -14  -7    0.50    1.65
  -4  14   7    5.35    4.05
   3 -14  -7   15.39    2.21
   3 -14  -7   14.96    2.24
  -3 -14   7   19.40    3.25
   3  14  -7   11.81    4.11
  -3  14   7   19.90    3.94
   2 -14  -7    5.37    1.55
  -2 -14   7    8.00    2.41
   2 -14  -7    5.55    2.03
  -2 -14   7    3.57    1.39
   2  14  -7    4.72    3.30
  -2  14   7    7.45    2.32
   2  14  -7    4.63    3.61
  -2  14   7    6.39    1.76
   1 -14  -7    4.79    2.35
  -1 -14   7    4.37    1.57
   1 -14  -7    4.67    1.47
  -1 -14   7    6.73    2.33
   1  14  -7    7.45    4.47
   1  14  -7    8.38    4.21
  -1  14   7    5.51    1.99
   0 -14  -7    8.55    2.59
   0 -14   7    8.16    1.24
   0 -14   7    9.82    1.78
   0 -14  -7    8.15    1.58
   0 -14   7    8.97    2.15
   0  14   7    9.27    2.28
   0  14  -7   12.13    4.23
   1 -14   7   28.19    2.28
   1 -14   7   25.88    2.51
  -1 -14  -7   28.47    2.12
  -1 -14  -7   26.76    3.39
   1 -14   7   29.07    2.01
  -1  14  -7   30.40    6.79
   1  14   7   27.20    3.22
   1  14   7   32.62    5.46
   2 -14   7    0.00    1.64
   2 -14   7   -0.02    1.35
  -2 -14  -7    0.94    1.10
  -2 -14  -7    0.02    2.93
   2  14   7    1.49    3.17
  -2  14  -7    4.48    4.27
   2  14   7    2.49    2.47
  -3 -14  -7   17.02    3.73
   3 -14   7   15.28    2.44
   3 -14   7    9.99    2.20
   3  14   7   19.52    3.26
   3 -15  -7   -0.52    1.51
  -3 -15   7    4.01    2.81
   3 -15  -7   -0.24    1.52
   3  15  -7   -5.29    3.29
  -3  15   7    3.38    2.24
   2 -15  -7    4.72    1.66
   2 -15  -7    2.70    2.09
  -2 -15   7    1.62    1.45
  -2 -15   7    6.26    2.68
  -2  15   7    4.23    2.16
   2  15  -7    5.71    3.47
   2  15  -7    1.83    3.81
   1 -15  -7    1.00    1.43
  -1 -15   7    3.09    2.30
  -1 -15   7   -0.18    1.48
   1 -15  -7    0.54    2.13
   1  15  -7    2.65    3.91
  -1  15   7    1.12    1.93
   1  15  -7    1.79    4.27
   1 -15   7    0.05    1.11
  -1 -15  -7    0.96    2.54
   1 -15   7    1.59    1.55
  -1 -15  -7    0.39    1.26
   1 -15   7    0.63    1.61
   1  15   7    0.73    2.14
  -1  15  -7   -2.55    5.52
   1  15   7    4.52    4.45
  -2 -15  -7   -0.46    1.14
  -2 -15  -7   -1.91    2.96
   2 -15   7   -0.61    1.67
   2 -15   7   -0.32    1.34
   2  15   7    2.29    2.36
  -2  15  -7    4.11    4.85
   2  15   7    2.33    3.50
  -3 -15  -7    2.57    3.34
   3 -15   7    0.29    1.73
   3  15   7    3.34    2.81
   3 -16  -7    0.80    1.59
   3 -16  -7   -1.85    1.49
  -3 -16   7    3.34    2.93
   2 -16  -7    6.86    1.77
  -2 -16   7    4.62    1.65
   2 -16  -7    5.79    2.31
  -2 -16   7    9.47    2.88
   2  16  -7   -0.57    4.15
  -2  16   7    7.68    2.39
   2  16  -7    6.91    3.95
   1 -16  -7    3.05    2.42
  -1 -16   7    3.33    2.33
   1 -16  -7    2.79    1.53
  -1 -16   7    2.97    1.59
  -1  16   7    5.25    2.28
   1  16  -7    4.39    3.75
   1  16  -7    8.59    4.52
   0 -16   7   25.98    2.83
   0 -16   7   20.10    2.49
   0 -16   7   24.36    1.73
   0 -16  -7   22.99    3.68
   0 -16  -7   26.10    2.40
   0  16   7   24.31    3.08
   1 -16   7   12.34    1.81
  -1 -16  -7    7.91    2.98
   1 -16   7   14.13    2.19
   1 -16   7    7.02    1.79
  -1 -16  -7    8.80    1.68
   1  16   7   15.27    4.77
  -1  16  -7   17.62    6.95
   1  16   7   13.22    2.61
   2 -16   7   48.94    2.98
   2 -16   7   44.45    3.17
  -2 -16  -7   47.03    2.54
  -2 -16  -7   50.23    5.14
   2  16   7   50.29    3.79
   2  16   7   45.53    7.13
  -3 -16  -7    1.99    3.56
   3  16   7    3.45    2.75
   3 -17  -7    5.70    1.94
   3 -17  -7    2.48    1.91
  -3 -17   7   13.16    3.51
   2 -17  -7    0.59    1.63
  -2 -17   7    0.75    2.66
  -2  17   7    1.91    2.22
   2  17  -7    4.13    4.10
   1 -17  -7   20.47    3.01
  -1 -17   7   23.13    3.44
   1 -17  -7   19.11    2.22
  -1 -17   7   17.51    2.20
   1  17  -7   18.93    4.40
   1  17  -7   20.17    5.09
  -1  17   7   19.43    3.02
   0 -17   7    7.96    1.96
   0 -17  -7   11.98    1.94
   0 -17   7   12.98    2.42
   0 -17   7    9.90    1.48
   0 -17  -7   11.74    3.11
   0  17   7   15.73    2.87
   1 -17   7   -0.50    1.69
   1 -17   7    1.71    1.28
  -1 -17  -7    0.03    1.38
  -1 -17  -7   -0.32    2.99
  -1  17  -7    0.86    7.08
   1  17   7    2.24    2.28
  -2 -17  -7    2.67    1.43
  -2 -17  -7    1.53    3.24
   2 -17   7    0.42    1.96
   2 -17   7    4.20    1.69
  -2  17  -7   15.01    5.77
   2  17   7    2.74    4.39
   2  17   7    6.93    2.65
   3 -17   7    3.01    1.99
  -3 -17  -7    2.94    3.88
   3  17   7    4.13    2.72
   3 -18  -7    0.98    1.87
   3 -18  -7    3.07    2.01
  -2 -18   7    4.52    2.93
   2 -18  -7    0.29    1.61
  -2  18   7    1.40    2.29
   2  18  -7   -0.02    4.46
   1 -18  -7    2.45    1.65
  -1 -18   7    1.47    1.83
   1 -18  -7    4.34    2.79
  -1 -18   7    5.19    2.62
  -1  18   7    6.94    2.45
   1  18  -7   -2.16    3.81
   0 -18   7    9.53    2.08
   0 -18  -7    8.29    3.03
   0 -18  -7   10.59    2.01
   0 -18   7   15.38    2.62
   0  18   7   14.50    2.78
  -1 -18  -7   21.57    3.59
   1 -18   7   18.22    2.48
   1 -18   7   19.97    2.12
  -1 -18  -7   20.68    2.57
   1  18   7   24.25    3.35
  -2 -18  -7    4.88    1.68
   2 -18   7    5.89    1.87
  -2 -18  -7    7.49    3.71
   2 -18   7    0.57    2.07
   2  18   7    9.50    2.84
   2  18   7    1.49    4.78
  -2 -19   7    2.85    2.85
   2 -19  -7   -1.83    1.73
  -2  19   7    1.57    2.29
   2  19  -7    0.90    5.00
   1 -19  -7   12.35    2.19
  -1 -19   7    6.65    2.08
  -1 -19   7   16.80    3.13
   1 -19  -7    9.60    2.99
  -1  19   7   14.99    2.93
   0 -19   7    3.70    2.19
   0 -19  -7   -1.76    2.84
   0 -19   7   -3.61    1.76
   0 -19  -7    0.13    1.65
   0  19  -7    4.59    9.47
   0  19   7    2.11    2.39
  -1 -19  -7    1.48    1.64
   1 -19   7   -2.78    1.88
  -1 -19  -7    0.85    3.41
   1 -19   7    2.84    1.43
  -1  19  -7    6.86    7.13
   1  19   7    6.92    2.66
  -2 -19  -7    1.47    3.82
   2 -19   7   -4.82    2.03
   2 -19   7   -0.16    1.64
   2  19   7    4.18    2.56
   2  19   7   -6.47    4.95
   2 -20  -7    2.78    2.04
  -2 -20   7    8.71    3.29
   2  20  -7    0.53    5.34
  -2  20   7    6.76    2.78
   1 -20  -7   -1.32    2.79
   1 -20  -7   -1.96    1.72
  -1 -20   7    2.45    2.65
  -1  20   7    2.75    2.42
   1  20  -7   -6.22    4.19
   0 -20  -7   -1.31    1.69
   0 -20   7   -2.33    1.92
   0 -20  -7   -1.42    3.08
   0 -20   7    5.19    2.37
   0  20   7    0.73    2.47
   0  20  -7   -8.51   10.60
  -1 -20  -7    3.93    1.94
  -1 -20  -7    3.79    3.42
   1 -20   7    0.86    2.14
   1 -20   7    4.86    1.70
  -1  20  -7   22.12    8.25
   1  20   7    9.39    2.87
   1 -21  -7    3.08    3.23
  -1 -21   7   10.75    3.20
  -1  21   7   11.24    2.94
   0 -21   7    7.00    2.50
   0 -21  -7    0.50    1.83
   0 -21  -7    0.79    3.25
   0 -21   7   -2.23    2.07
   0  21   7    6.28    2.80
  -1 -21  -7   -1.76    1.66
   1 -21   7    0.81    1.45
  -1 -21  -7    1.03    3.68
  -1  21  -7   18.96    8.27
   1  21   7    3.29    2.71
  -5   0   8   -1.66    4.46
   5   0  -8   -2.02    1.81
   4   0  -8    2.12    1.58
  -4   0   8    4.77    3.03
   4   0  -8    1.75    1.26
  -4   0   8    3.00    1.58
   3   0  -8    0.39    0.99
   3   0  -8    0.44    0.83
  -3   0   8   -0.49    1.30
  -3   0   8   -0.80    1.74
  -2   0   8   16.89    1.26
   2   0  -8   16.16    0.95
  -2   0   8   16.73    1.66
   2   0  -8   16.07    1.54
  -2   0   8   15.48    2.33
  -1   0   8   -0.37    0.92
  -1   0   8   -0.50    0.64
   1   0  -8    0.03    0.50
   1   0  -8    0.43    1.05
  -1   0   8   -0.76    0.78
   0   0   8    0.05    0.97
   0   0   8    0.17    0.88
   0   0   8    1.60    1.10
   0   0  -8    3.27    1.92
   1   0   8    0.01    0.45
  -1   0  -8    0.74    1.53
   1   0   8    0.68    0.95
  -1   0  -8   -0.83    0.88
   1   0   8    1.29    1.07
   2   0   8    2.24    0.79
   2   0   8    2.17    1.03
  -2   0  -8    1.64    1.56
  -2   0  -8    2.45    1.11
   2   0   8    3.43    1.52
  -3   0  -8   -0.63    2.11
   3   0   8    0.00    1.86
   3   0   8   -0.21    0.99
   3   0   8    1.10    1.20
   4   0   8    1.31    1.58
   4   0   8    0.12    2.39
  -4   0  -8    5.20    3.58
   5  -1  -8    9.48    2.54
  -5  -1   8   22.00    5.88
   5   1  -8    9.64    2.75
  -4  -1   8    5.81    1.74
   4  -1  -8    6.56    1.51
  -4  -1   8    6.01    3.16
   4  -1  -8    4.67    1.64
  -4   1   8    5.63    1.79
  -4   1   8    6.22    3.10
   4   1  -8    4.48    1.77
  -3  -1   8    1.47    1.89
  -3  -1   8    4.08    1.56
   3  -1  -8    2.96    1.20
   3  -1  -8    3.35    0.99
  -3   1   8    2.80    1.91
   3   1  -8    3.54    1.28
   3   1  -8    3.46    0.95
  -3   1   8    3.76    0.90
  -3   1   8    2.77    1.45
   2  -1  -8   26.49    1.81
  -2  -1   8   25.88    1.35
  -2  -1   8   27.40    1.89
   2  -1  -8   26.62    1.21
   2   1  -8   25.93    1.05
   2   1  -8   27.42    1.94
  -2   1   8   26.15    1.82
  -2   1   8   26.50    1.43
  -2   1   8   25.24    2.49
   1  -1  -8  218.19    6.26
  -1  -1   8  219.15    3.97
  -1  -1   8  222.48    3.90
  -1  -1   8  214.40    4.84
   1  -1  -8  224.01    5.14
  -1   1   8  216.75    4.02
  -1   1   8  217.81    4.22
  -1   1   8  219.90    4.93
   1   1  -8  218.99    6.54
   1   1  -8  224.82    5.18
   0  -1   8   10.19    1.34
   0  -1   8   14.60    1.37
   0  -1   8   10.94    1.41
   0   1  -8   19.03    3.55
   0   1   8   12.02    1.36
   0   1   8   13.79    1.67
   0   1   8   12.62    1.64
   1  -1   8  285.81    5.70
  -1  -1  -8  283.48    5.82
   1  -1   8  289.61    6.28
   1  -1   8  293.36    5.03
   1  -1   8  283.74    5.77
  -1  -1  -8  286.56    7.61
   1   1   8  277.02    5.74
  -1   1  -8  283.35    8.12
   1   1   8  289.64    6.29
   1   1   8  291.42    5.00
   2  -1   8   -0.02    1.02
   2  -1   8    1.34    1.38
  -2  -1  -8   -0.95    1.06
   2  -1   8    0.25    0.67
  -2  -1  -8   -0.39    1.36
  -2   1  -8    0.08    0.94
   2   1   8    0.27    0.71
   2   1   8    1.14    1.39
   2   1   8    0.10    0.91
  -2   1  -8   -0.93    1.64
  -3  -1  -8   25.88    3.70
   3  -1   8   28.01    2.05
  -3  -1  -8   28.54    2.27
   3  -1   8   27.16    2.37
   3  -1   8   27.58    2.74
  -3   1  -8   29.39    4.68
   3   1   8   30.43    2.94
   3   1   8   29.40    1.95
   3   1   8   29.24    2.48
   4  -1   8    3.76    2.40
   4  -1   8    5.70    1.80
  -4  -1  -8   11.80    3.61
   4   1   8    3.48    1.81
   4   1   8    4.40    2.62
  -5  -2   8   -4.02    4.49
   5  -2  -8   -0.12    1.76
  -5   2   8   -3.36    3.92
   4  -2  -8   50.61    2.53
  -4  -2   8   51.17    3.05
  -4  -2   8   52.22    5.93
   4  -2  -8   51.63    3.74
  -4   2   8   49.51    5.50
   4   2  -8   50.61    3.88
  -3  -2   8    0.27    1.50
   3  -2  -8   -0.39    0.90
   3  -2  -8    0.06    0.81
  -3  -2   8    0.96    2.01
   3   2  -8   -0.34    0.84
  -3   2   8    0.28    1.71
   3   2  -8    0.92    1.20
  -3   2   8    0.22    1.35
  -2  -2   8  119.90    2.58
   2  -2  -8  122.93    3.99
  -2  -2   8  120.57    3.59
  -2   2   8  121.08    4.79
  -2   2   8  123.75    2.76
   2   2  -8  129.92    4.17
  -2   2   8  119.00    3.03
   2   2  -8  123.68    2.53
   2   2  -8  120.86    4.87
  -2   2   8  121.21    3.49
  -1  -2   8    5.34    1.12
  -1  -2   8    7.16    0.96
  -1  -2   8    5.80    0.55
   1  -2  -8    5.26    1.17
   1   2  -8    7.44    1.65
  -1   2   8    7.03    1.35
  -1   2   8    6.48    1.02
   1   2  -8    7.72    1.27
  -1   2   8    4.70    1.01
   0  -2   8    0.87    0.94
   0  -2  -8    4.22    1.58
   0  -2   8    0.69    0.99
   0  -2   8    1.72    0.83
   0   2   8    0.30    1.23
   0   2  -8    5.37    2.38
   0   2   8    1.53    1.29
   0   2   8    0.62    0.93
   1  -2   8   37.51    1.77
   1  -2   8   38.73    1.76
  -1  -2  -8   38.32    1.91
   1  -2   8   40.02    1.82
  -1  -2  -8   37.43    2.34
   1   2   8   38.46    1.80
   1   2   8   41.32    2.24
   1   2   8   39.77    1.78
  -1   2  -8   40.05    3.37
  -2  -2  -8    5.56    1.57
  -2  -2  -8    8.29    1.47
   2  -2   8    6.97    1.24
   2  -2   8    8.67    1.57
   2  -2   8    6.74    1.23
   2   2   8    8.63    1.74
   2   2   8    8.26    1.16
  -2   2  -8    7.15    1.05
  -2   2  -8    4.67    2.09
   2   2   8    5.36    1.09
   3  -2   8    0.93    1.77
   3  -2   8    0.85    1.30
   3  -2   8    0.20    0.96
  -3  -2  -8    0.58    1.64
  -3  -2  -8   -0.55    1.70
   3   2   8   -0.06    1.19
   3   2   8    2.26    2.12
   3   2   8    1.02    1.14
  -3   2  -8   -0.09    2.57
   4  -2   8   14.56    2.81
   4  -2   8   15.14    2.93
  -4  -2  -8   23.16    4.13
   4   2   8   12.71    2.42
   4   2   8   17.11    3.05
   5  -3  -8    2.56    1.96
  -5   3   8    6.64    4.73
   5   3  -8   -0.99    2.13
   4  -3  -8    5.50    1.66
  -4  -3   8    8.70    2.05
   4  -3  -8    7.53    1.57
  -4  -3   8    4.72    3.41
   4   3  -8    3.67    1.87
  -4   3   8    7.46    3.20
  -3  -3   8    6.46    1.84
   3  -3  -8    4.17    1.21
   3  -3  -8    5.55    0.89
   3  -3  -8    5.60    1.16
   3   3  -8    5.74    1.14
  -3   3   8    5.08    1.56
  -3   3   8    5.47    2.08
   3   3  -8    4.31    1.51
  -2  -3   8   40.83    2.31
  -2  -3   8   40.97    1.53
   2   3  -8   43.84    2.48
  -2   3   8   40.52    1.85
   2   3  -8   40.04    2.81
  -2   3   8   41.25    2.80
  -2   3   8   43.20    1.74
  -2   3   8   42.69    2.13
   2   3  -8   41.22    1.18
  -1  -3   8    0.34    1.02
  -1  -3   8    1.06    0.80
  -1   3   8    0.34    0.91
   1   3  -8    0.49    1.42
   1   3  -8    0.82    0.88
  -1   3   8   -0.06    0.87
  -1   3   8    0.21    1.21
   0  -3   8  122.87    2.62
   0  -3   8  128.15    3.20
   0  -3   8  121.32    2.77
   0  -3  -8  128.67    4.05
   0   3   8  126.32    3.55
   0   3   8  122.31    3.30
   0   3   8  129.29    2.91
   0   3  -8  111.30    5.56
   1  -3   8   70.62    2.23
  -1  -3  -8   67.85    2.51
   1  -3   8   66.66    2.13
  -1  -3  -8   67.72    2.68
   1  -3   8   69.02    2.27
  -1   3  -8   68.34    4.20
   1   3   8   63.97    2.72
   1   3   8   67.23    2.15
   1   3   8   67.44    2.49
  -2  -3  -8    5.59    1.46
  -2  -3  -8    6.77    1.56
   2  -3   8    5.79    1.25
   2  -3   8    6.12    1.49
   2   3   8    5.30    1.09
   2   3   8    6.36    1.73
  -2   3  -8    5.49    2.19
   2   3   8    4.29    1.11
  -2   3  -8    5.83    0.95
  -3  -3  -8   37.49    2.78
   3  -3   8   39.86    2.81
  -3  -3  -8   39.65    3.63
   3  -3   8   41.78    2.94
   3  -3   8   39.29    2.33
   3   3   8   36.20    3.04
   3   3   8   36.39    1.89
   3   3   8   40.41    3.26
  -3   3  -8   38.76    4.98
  -4  -3  -8    4.50    2.70
   4  -3   8    1.19    2.03
   4  -3   8    1.80    1.52
   4   3   8    0.81    1.85
  -4   3  -8    5.18    3.75
   4   3   8    0.44    2.60
  -5   4   8    3.76    4.56
   4  -4  -8    0.18    1.28
  -4  -4   8    1.82    1.90
   4  -4  -8   -0.80    1.14
   4   4  -8   -0.54    1.68
  -4   4   8    1.36    2.76
   4   4  -8    1.10    2.02
   3  -4  -8   75.83    2.74
   3  -4  -8   79.08    2.24
  -3  -4   8   78.99    3.50
  -3   4   8   76.29    3.08
  -3   4   8   78.48    4.53
   3   4  -8   78.64    4.05
   3   4  -8   79.27    4.69
  -2  -4   8    0.06    0.74
  -2  -4   8    0.32    1.20
   2   4  -8   -0.38    1.28
  -2   4   8   -0.21    0.87
   2   4  -8   -0.47    0.56
  -2   4   8   -0.51    0.95
  -2   4   8   -0.55    1.13
   2   4  -8    0.58    1.04
  -2   4   8    0.52    1.22
  -1  -4   8   19.07    1.38
  -1  -4   8   17.45    1.76
   1   4  -8   22.81    1.99
   1   4  -8   21.68    2.79
  -1   4   8   19.81    1.86
  -1   4   8   19.13    1.48
  -1   4   8   19.17    1.53
  -1   4   8   19.31    1.70
   0  -4   8   15.65    0.99
   0  -4   8   15.88    1.45
   0  -4   8   13.64    1.43
   0  -4  -8   13.46    1.60
   0   4   8   15.58    1.46
   0   4   8   13.95    1.85
   0   4  -8   21.71    4.26
  -1  -4  -8   43.01    2.21
   1  -4   8   46.29    1.84
   1  -4   8   46.52    1.97
  -1  -4  -8   43.64    1.96
   1  -4   8   45.05    1.75
   1   4   8   44.03    1.83
   1   4   8   42.70    2.26
  -1   4  -8   42.71    4.08
   1   4   8   42.38    2.52
  -2  -4  -8    1.28    1.18
   2  -4   8    0.83    1.20
  -2  -4  -8    2.68    1.48
   2  -4   8    1.54    1.13
  -2   4  -8    0.97    0.77
   2   4   8    1.61    1.11
   2   4   8    0.87    0.97
   2   4   8    2.57    1.84
  -2   4  -8   -0.25    2.15
  -3  -4  -8   20.18    2.97
  -3  -4  -8   20.02    2.77
   3  -4   8   21.16    2.18
   3  -4   8   21.38    2.28
   3  -4   8   21.95    2.17
  -3   4  -8   21.42    4.91
   3   4   8   18.67    2.79
   3   4   8   22.89    3.17
   4  -4   8    1.74    1.47
  -4  -4  -8    3.42    2.46
   4  -4   8    0.23    2.18
   4   4   8    0.13    2.67
   4   4   8   -2.08    1.73
  -4   4  -8    5.56    3.87
   5  -5  -8    9.71    2.50
   5  -5  -8   11.42    2.30
   5   5  -8    4.37    2.75
  -5   5   8   19.13    5.56
  -4  -5   8    5.95    2.14
   4  -5  -8    4.70    1.50
   4  -5  -8    4.30    1.62
  -4   5   8    6.06    3.11
   4   5  -8    1.73    1.99
   4   5  -8    4.85    2.76
   3  -5  -8    3.86    0.93
  -3  -5   8    3.85    1.94
   3  -5  -8    4.02    1.22
  -3   5   8    3.65    1.93
  -3   5   8    3.64    1.67
   3   5  -8    2.86    1.99
   3   5  -8    2.85    1.61
  -2  -5   8   64.27    2.91
  -2  -5   8   61.56    1.86
  -2   5   8   64.84    2.25
   2   5  -8   65.34    3.24
  -2   5   8   61.06    3.35
  -2   5   8   60.62    2.42
   2   5  -8   62.00    3.83
  -2   5   8   63.82    2.69
  -1  -5   8  196.20    3.71
  -1  -5   8  197.44    4.75
  -1   5   8  198.24    4.47
   1   5  -8  191.11    5.39
  -1   5   8  201.33    4.89
  -1   5   8  197.52    5.57
   1   5  -8  197.04    6.89
  -1   5   8  196.67    3.98
   0  -5   8   82.77    2.61
   0  -5   8   82.70    2.39
   0  -5  -8   81.57    2.88
   0  -5   8   84.13    2.00
   0  -5  -8   85.62    2.71
   0   5  -8   81.25    5.53
   0   5   8   79.15    2.89
   0   5   8   82.70    2.36
   1  -5   8   86.40    2.54
   1  -5   8   89.38    2.43
   1  -5   8   86.26    2.51
  -1  -5  -8   87.32    2.61
  -1  -5  -8   84.00    2.99
   1   5   8   81.93    3.19
   1   5   8   84.07    3.24
   1   5   8   87.04    2.44
  -1   5  -8   83.56    5.09
  -2  -5  -8    4.38    1.71
   2  -5   8    5.30    1.33
  -2  -5  -8    3.41    1.22
   2  -5   8    3.61    1.22
   2   5   8    5.45    2.12
   2   5   8    3.58    1.30
  -2   5  -8    4.88    0.81
  -2   5  -8    2.76    2.49
   2   5   8    4.38    1.10
   3  -5   8   -0.44    1.36
  -3  -5  -8    0.39    1.57
   3  -5   8    0.45    1.67
  -3  -5  -8   -1.01    1.87
   3   5   8    2.22    2.44
  -3   5  -8   -0.65    2.74
   3   5   8    0.73    1.53
   4  -5   8   14.66    2.78
   4  -5   8   17.55    2.79
  -4  -5  -8   16.55    3.62
   4   5   8   14.84    3.19
  -4  -6   8  104.08    4.55
   4  -6  -8  102.59    3.83
   4  -6  -8   98.22    4.99
  -4   6   8  103.32    6.86
   4   6  -8   94.39    5.48
   4   6  -8  107.32    6.85
   3  -6  -8    0.47    1.06
   3  -6  -8    0.73    0.91
  -3  -6   8    0.30    1.87
   3   6  -8    0.61    1.62
  -3   6   8    0.71    1.67
   3   6  -8    0.50    1.91
  -3   6   8   -0.22    1.55
  -2  -6   8  183.60    3.54
  -2  -6   8  187.87    5.10
  -2   6   8  192.48    4.89
  -2   6   8  191.43    4.10
  -2   6   8  192.60    4.75
   2   6  -8  192.20    5.96
  -2   6   8  187.00    6.20
   2   6  -8  187.06    6.94
   1  -6  -8   23.50    1.85
  -1  -6   8   26.11    1.83
  -1  -6   8   29.11    1.62
   1   6  -8   27.71    3.35
  -1   6   8   26.65    1.73
  -1   6   8   26.36    1.76
   1   6  -8   30.11    2.85
  -1   6   8   24.64    1.84
   0  -6   8    4.59    0.72
   0  -6   8    5.31    1.08
   0  -6   8    4.52    1.16
   0  -6  -8    5.28    1.49
   0   6   8    4.22    1.44
   0   6  -8    7.73    2.99
   0   6   8    5.68    1.16
   1  -6   8   41.07    1.78
   1  -6   8   42.82    2.00
  -1  -6  -8   41.68    1.51
   1  -6   8   41.11    1.71
  -1  -6  -8   40.52    2.39
   1   6   8   39.38    2.81
   1   6   8   42.76    1.96
   1   6   8   39.81    2.74
  -1   6  -8   45.26    4.77
   2  -6   8  156.20    4.25
  -2  -6  -8  157.46    4.99
   2  -6   8  154.74    3.80
  -2  -6  -8  155.51    4.65
  -2   6  -8  163.12    7.03
   2   6   8  150.10    5.08
   2   6   8  151.63    4.82
   2   6   8  158.17    3.49
  -3  -6  -8    1.60    2.07
  -3  -6  -8    0.92    1.56
   3  -6   8    1.23    1.69
   3  -6   8    0.33    1.47
  -3   6  -8    0.75    2.83
   3   6   8    1.40    1.75
   3   6   8    2.46    2.54
  -4  -6  -8   35.32    3.99
   4  -6   8   41.06    3.42
   4  -6   8   33.81    3.32
   4   6   8   28.88    4.23
   4   6   8   31.32    3.87
  -4  -7   8    3.00    2.30
   4  -7  -8    0.32    1.38
   4   7  -8    0.78    2.93
  -4   7   8    2.25    3.12
   4   7  -8   -1.71    2.10
  -3  -7   8    0.70    1.99
   3  -7  -8    1.75    1.21
   3  -7  -8    1.81    1.02
  -3   7   8    2.24    1.66
   3   7  -8    2.29    2.29
  -3   7   8    1.39    1.87
   3   7  -8    2.16    1.87
  -2  -7   8   64.13    2.02
  -2  -7   8   62.25    3.15
  -2   7   8   65.70    2.44
   2   7  -8   68.32    3.98
   2   7  -8   66.90    4.33
  -2   7   8   63.71    3.33
  -2   7   8   65.69    2.79
   1  -7  -8   13.14    1.76
  -1  -7   8   10.00    1.59
  -1  -7   8   14.06    1.48
  -1   7   8   12.51    1.55
   1   7  -8   16.53    3.38
  -1   7   8   13.03    1.40
  -1   7   8   14.88    1.78
   1   7  -8   19.07    3.26
   0  -7   8  101.86    2.36
   0  -7  -8  104.94    3.42
   0  -7   8  100.12    3.05
   0  -7   8  103.79    2.77
   0   7  -8   94.81    6.03
   0   7   8  103.22    2.82
   0   7   8   96.89    3.31
  -1  -7  -8    6.89    1.58
   1  -7   8    7.29    1.11
   1  -7   8    7.26    1.10
   1  -7   8    6.03    1.17
   1   7   8    7.18    1.76
   1   7   8    9.49    2.11
  -1   7  -8    9.12    2.85
   1   7   8    6.65    1.18
   2  -7   8    1.66    1.31
  -2  -7  -8    0.80    1.86
   2  -7   8    1.42    1.16
  -2  -7  -8    0.87    1.01
   2   7   8    0.45    1.04
   2   7   8    0.96    1.59
  -2   7  -8   -0.37    2.67
   2   7   8    2.29    2.30
   3  -7   8   11.76    1.78
   3  -7   8   10.72    2.03
  -3  -7  -8   10.29    2.05
  -3  -7  -8   13.33    2.54
  -3   7  -8   15.23    3.82
   3   7   8   12.52    2.92
   3   7   8    8.21    2.17
   4  -7   8    6.74    2.41
   4  -7   8    7.96    1.87
   4   7   8    5.74    3.05
   4   7   8    3.53    2.42
   4  -8  -8    1.35    1.38
  -4  -8   8    3.88    2.34
   4   8  -8    0.00    2.88
  -4   8   8    1.20    2.99
   4   8  -8   -1.07    2.28
  -3  -8   8   77.34    3.97
   3  -8  -8   76.30    3.13
   3  -8  -8   78.10    2.66
   3  -8  -8   81.14    3.13
   3   8  -8   78.05    5.56
   3   8  -8   75.08    4.79
  -3   8   8   76.97    4.79
  -2  -8   8   13.86    1.49
   2  -8  -8   13.71    1.48
  -2  -8   8   12.94    2.19
   2  -8  -8   13.87    1.93
  -2   8   8   13.92    1.97
  -2   8   8   14.11    2.10
   2   8  -8   19.52    3.28
   2   8  -8   14.66    3.21
   1  -8  -8   41.98    2.41
  -1  -8   8   42.55    1.02
  -1  -8   8   41.31    2.31
  -1  -8   8   44.07    1.90
  -1   8   8   43.54    1.99
  -1   8   8   43.01    2.14
   1   8  -8   48.28    4.00
   1   8  -8   44.77    4.31
  -1   8   8   41.85    2.38
   0  -8   8   78.46    2.05
   0  -8   8   78.83    2.53
   0  -8   8   80.06    2.81
   0  -8  -8   79.57    3.12
   0   8  -8   75.11    5.58
   0   8   8   83.09    2.63
   0   8   8   74.86    3.06
  -1  -8  -8   20.00    2.39
   1  -8   8   19.59    1.43
   1  -8   8   19.45    1.54
   1  -8   8   19.30    1.83
   1   8   8   22.06    3.29
   1   8   8   19.47    2.70
  -1   8  -8   22.35    3.72
   1   8   8   19.24    1.76
  -2  -8  -8    7.77    1.36
  -2  -8  -8    9.39    2.29
   2  -8   8    9.13    1.54
   2  -8   8    9.02    1.57
   2   8   8    7.95    2.11
   2   8   8    9.20    1.34
  -2   8  -8    6.45    2.93
   2   8   8   10.24    2.63
   3  -8   8   24.31    2.24
  -3  -8  -8   25.52    3.48
   3  -8   8   23.37    2.45
  -3   8  -8   31.21    5.70
   3   8   8   22.91    3.78
   3   8   8   22.58    3.52
   4  -8   8    4.06    2.36
   4   8   8    4.35    3.04
   4   8   8   -0.94    2.43
  -4  -9   8    2.57    2.51
   4  -9  -8    1.15    1.42
   4   9  -8    0.31    3.11
  -4   9   8    2.75    3.38
   4   9  -8   -2.74    2.34
   3  -9  -8    2.94    1.56
   3  -9  -8    2.77    1.17
   3  -9  -8    2.65    1.34
  -3  -9   8    0.63    2.13
   3   9  -8    3.27    2.57
  -3   9   8    3.32    1.97
   3   9  -8    1.40    2.18
   2  -9  -8   47.89    2.72
  -2  -9   8   46.02    3.15
   2  -9  -8   48.22    2.20
  -2  -9   8   46.47    2.04
  -2   9   8   44.27    2.96
  -2   9   8   46.99    2.76
   2   9  -8   53.73    4.25
   2   9  -8   51.67    4.72
  -1  -9   8   38.24    1.07
   1  -9  -8   39.55    2.52
  -1  -9   8   37.39    2.54
  -1  -9   8   41.48    2.06
  -1   9   8   37.09    2.30
  -1   9   8   38.52    2.02
  -1   9   8   38.64    2.06
   1   9  -8   40.63    4.49
   1   9  -8   45.02    4.80
   0  -9  -8  133.67    4.19
   0  -9   8  134.66    3.73
   0  -9   8  134.35    3.36
   0  -9   8  135.64    3.02
   0   9   8  129.23    3.98
   0   9  -8  128.40    7.16
   0   9   8  137.46    3.50
   1  -9   8    9.12    1.55
   1  -9   8    8.94    1.25
  -1  -9  -8    6.99    1.87
   1  -9   8   10.59    1.38
   1   9   8   11.35    2.30
  -1   9  -8   12.58    3.84
   1   9   8   11.13    2.58
   1   9   8    8.54    1.39
   2  -9   8    9.28    1.70
  -2  -9  -8    9.72    2.55
   2  -9   8    9.94    1.62
  -2   9  -8    6.84    3.14
   2   9   8    9.75    2.65
   2   9   8   10.71    2.37
   2   9   8    9.59    1.42
   3  -9   8    0.55    1.57
  -3  -9  -8   -0.03    2.33
   3  -9   8   -0.18    1.56
   3   9   8    0.01    2.09
   3   9   8    2.35    2.62
  -3   9  -8    3.57    3.58
  -4  -9  -8   11.02    2.86
   4  -9   8    8.33    2.46
   4   9   8    5.61    3.19
   4 -10  -8   49.57    3.08
  -4 -10   8   62.21    4.45
   4  10  -8   49.02    6.26
  -4  10   8   60.59    6.26
   3 -10  -8    1.12    1.14
  -3 -10   8    1.96    2.23
   3 -10  -8    1.93    1.34
   3  10  -8    1.85    2.74
   3  10  -8    0.54    2.34
  -3  10   8    1.43    1.90
   2 -10  -8  125.38    3.48
  -2 -10   8  124.37    3.13
   2 -10  -8  126.66    4.13
  -2 -10   8  122.88    4.61
  -2  10   8  121.44    4.88
   2  10  -8  126.07    6.62
  -2  10   8  122.55    4.21
   2  10  -8  122.76    5.88
   1 -10  -8    1.88    1.62
  -1 -10   8    2.29    0.53
  -1 -10   8    1.07    1.73
  -1 -10   8    3.43    1.23
  -1  10   8    1.14    0.87
  -1  10   8    2.65    1.69
  -1  10   8    3.67    1.42
   1  10  -8    5.34    2.97
   1  10  -8    5.35    3.28
   0 -10  -8   -0.16    1.72
   0 -10   8    1.27    1.23
   0 -10   8    0.10    1.38
   0 -10   8   -0.28    0.61
   0  10  -8    5.09    3.50
   0  10   8    0.56    1.21
   0  10   8   -1.39    1.54
   1 -10   8    3.64    1.08
  -1 -10  -8    4.36    1.94
   1 -10   8    3.70    1.35
   1 -10   8    3.97    1.29
   1  10   8    4.24    2.87
   1  10   8    2.68    1.24
   1  10   8    3.98    2.17
  -1  10  -8    5.00    3.90
   2 -10   8   91.65    3.30
  -2 -10  -8   94.22    4.56
   2 -10   8   92.63    3.39
  -2  10  -8   92.74    6.79
   2  10   8   88.38    5.45
   2  10   8   89.51    4.42
   2  10   8   96.41    3.00
  -3 -10  -8   -0.39    2.55
   3 -10   8   -0.72    1.50
   3 -10   8   -1.57    1.51
   3  10   8   -1.19    2.29
   3  10   8    1.30    2.64
  -3  10  -8    3.27    3.98
   4 -10   8   21.24    3.06
  -4 -10  -8   24.02    3.55
   4  10   8   16.05    3.59
   4 -11  -8    1.61    1.57
  -4 -11   8    6.98    2.79
  -4  11   8    6.00    3.70
   4  11  -8   -1.24    3.29
   3 -11  -8    3.18    1.50
   3 -11  -8    1.54    1.24
  -3 -11   8    4.29    2.50
   3  11  -8    2.00    2.96
  -3  11   8    4.16    2.13
   3  11  -8    2.72    2.68
   2 -11  -8    1.16    1.25
   2 -11  -8    1.90    1.77
  -2 -11   8    1.85    2.22
  -2 -11   8    0.31    1.24
   2  11  -8    5.46    2.77
  -2  11   8    1.55    1.67
   2  11  -8    2.49    2.99
  -2  11   8    2.02    1.39
   1 -11  -8    6.61    1.97
   1 -11  -8    2.76    1.20
  -1 -11   8    4.46    0.70
  -1 -11   8    4.23    1.31
  -1 -11   8    3.16    1.90
  -1  11   8    4.90    1.09
   1  11  -8    7.70    3.65
   1  11  -8    6.99    3.39
  -1  11   8    4.12    1.89
   0 -11   8    5.78    1.63
   0 -11  -8    5.85    1.85
   0 -11   8    6.23    0.98
   0 -11   8    5.68    1.36
   0  11   8    6.63    1.52
   0  11   8    7.44    2.19
   0  11  -8   10.14    3.89
   1 -11   8    8.96    1.37
   1 -11   8    9.30    1.53
   1 -11   8    8.53    1.63
  -1 -11  -8   11.09    2.47
   1  11   8    8.95    1.54
   1  11   8   10.36    3.41
   1  11   8    8.40    2.39
  -1  11  -8   12.43    4.31
  -2 -11  -8   13.98    2.98
   2 -11   8   10.75    1.88
   2 -11   8   11.49    1.81
   2  11   8   13.18    2.92
   2  11   8   10.67    1.56
   2  11   8   12.76    2.94
  -2  11  -8   11.61    3.90
  -3 -11  -8    0.91    2.67
   3 -11   8    0.52    1.61
   3 -11   8   -1.50    1.66
   3  11   8   -2.84    2.42
  -3  11  -8    5.05    4.60
   3  11   8    0.98    2.63
   4 -11   8    5.85    2.54
  -4 -11  -8    9.34    3.16
   4  11   8   -1.10    3.20
  -4 -12   8    7.13    2.90
   4 -12  -8    3.44    1.74
   4  12  -8    0.68    3.39
  -4  12   8    8.45    3.64
  -3 -12   8   21.37    3.22
   3 -12  -8   15.49    1.90
   3  12  -8    9.04    3.13
   3  12  -8   13.11    3.79
  -3  12   8   18.94    3.68
   2 -12  -8   18.06    2.38
   2 -12  -8   18.49    2.03
  -2 -12   8   18.00    2.85
  -2 -12   8   16.53    1.96
  -2  12   8   17.45    2.57
  -2  12   8   19.32    2.38
   2  12  -8   16.48    3.32
   2  12  -8   17.39    3.90
   1 -12  -8   -0.39    1.08
  -1 -12   8   -0.67    1.93
  -1 -12   8    2.11    1.42
   1 -12  -8    2.18    2.01
   1  12  -8    3.24    3.87
   1  12  -8    5.14    3.79
  -1  12   8    1.36    0.96
  -1  12   8    0.61    1.93
   0 -12   8   14.56    2.09
   0 -12   8   15.22    2.07
   0 -12   8   12.56    1.20
   0 -12  -8   17.30    2.60
   0  12  -8   15.83    4.16
   0  12   8   14.54    2.25
  -1 -12  -8   14.33    2.74
   1 -12   8   13.72    1.47
   1 -12   8   14.16    1.99
   1 -12   8   12.98    1.97
  -1  12  -8   20.93    4.92
   1  12   8   13.80    2.62
   1  12   8   11.22    4.04
  -2 -12  -8    0.80    1.00
   2 -12   8    0.70    1.27
  -2 -12  -8    1.77    2.64
   2 -12   8    0.47    1.65
   2  12   8    1.04    2.73
  -2  12  -8    1.73    3.69
   2  12   8    2.99    2.57
   3 -12   8    1.42    1.71
   3 -12   8    1.36    1.79
  -3 -12  -8    1.91    2.89
   3  12   8    4.78    2.84
   3  12   8   -1.24    2.85
  -3  12  -8   10.21    5.16
  -4 -12  -8   10.75    3.62
   4  12   8    0.45    3.41
  -4 -13   8    7.89    3.08
   4 -13  -8    3.08    1.79
   4  13  -8    0.44    3.69
  -4  13   8    8.65    3.93
   3 -13  -8   -0.60    1.36
  -3 -13   8    3.73    2.57
  -3  13   8    0.91    1.94
   3  13  -8   -1.41    2.82
   3  13  -8   -2.35    3.28
  -2 -13   8    3.00    2.10
  -2 -13   8    0.95    1.33
   2 -13  -8    3.43    1.38
   2 -13  -8    2.34    1.91
   2  13  -8    4.25    3.04
  -2  13   8    3.65    2.02
   2  13  -8    0.74    3.26
  -2  13   8    2.90    1.45
   1 -13  -8   36.63    2.35
  -1 -13   8   31.97    3.11
   1 -13  -8   33.76    3.14
  -1 -13   8   34.83    2.32
  -1  13   8   31.06    3.03
   1  13  -8   44.65    6.53
   1  13  -8   39.46    8.07
   0 -13   8   51.37    2.73
   0 -13  -8   51.90    3.71
   0 -13  -8   49.38    2.40
   0 -13   8   48.19    3.04
   0 -13   8   48.99    2.00
   0  13  -8   50.55    6.62
   0  13   8   47.67    3.32
   1 -13   8   22.32    2.22
   1 -13   8   20.65    2.43
   1 -13   8   20.04    1.76
  -1 -13  -8   25.79    3.70
  -1 -13  -8   19.19    2.01
   1  13   8   22.72    5.00
   1  13   8   21.51    3.09
  -1  13  -8   26.74    5.69
  -2 -13  -8   23.45    4.04
  -2 -13  -8   22.48    1.82
   2 -13   8   22.20    2.12
   2 -13   8   19.58    2.48
  -2  13  -8   30.11    6.79
   2  13   8   25.32    5.15
   2  13   8   25.32    3.61
   3 -13   8    2.31    1.75
   3 -13   8    0.29    1.83
  -3 -13  -8    2.22    3.17
  -3  13  -8   15.21    5.95
   3  13   8    4.59    2.77
   3 -14  -8    1.04    1.52
  -3 -14   8    3.74    2.71
   3  14  -8   -3.16    3.55
  -3  14   8    4.30    2.22
   3  14  -8   -1.70    3.24
   2 -14  -8   11.05    2.35
  -2 -14   8   11.42    1.69
  -2 -14   8   11.23    2.73
   2 -14  -8   10.28    1.75
   2  14  -8    9.09    3.98
   2  14  -8   11.14    3.49
  -2  14   8   15.87    2.68
  -1 -14   8    1.27    2.12
   1 -14  -8    1.75    1.37
  -1 -14   8    1.11    1.52
   1 -14  -8    0.77    2.25
   1  14  -8    5.13    4.21
  -1  14   8    2.15    1.92
   1  14  -8    5.17    4.37
   0 -14   8    6.99    1.82
   0 -14  -8    7.35    2.55
   0 -14  -8    9.11    1.66
   0 -14   8    8.92    1.26
   0 -14   8    8.92    2.06
   0  14  -8    9.45    4.19
   0  14   8    8.56    2.56
   1 -14   8    4.35    1.61
   1 -14   8    4.54    1.30
  -1 -14  -8    3.83    2.59
  -1 -14  -8    3.44    1.30
   1 -14   8    2.47    1.65
   1  14   8    6.36    2.51
  -1  14  -8   -1.61    5.36
   1  14   8    6.72    4.47
  -2 -14  -8    5.90    1.37
  -2 -14  -8    7.75    3.22
   2 -14   8    6.53    1.88
   2 -14   8    6.46    1.69
  -2  14  -8   15.69    5.31
   2  14   8    7.55    2.68
   2  14   8    8.58    3.43
   3 -14   8   -0.06    1.73
  -3 -14  -8   -0.64    3.11
  -3  14  -8   16.46    6.37
   3  14   8    3.23    2.79
   3 -15  -8   -0.95    1.53
  -3 -15   8    4.66    2.80
   3  15  -8   -5.65    3.88
  -3  15   8    3.02    2.35
  -2 -15   8   14.86    1.85
  -2 -15   8   21.05    3.09
   2 -15  -8   13.85    2.01
   2 -15  -8   18.72    2.65
   2  15  -8   12.95    4.51
  -2  15   8   20.24    2.87
   2  15  -8   14.03    3.79
  -1 -15   8    2.26    2.13
  -1 -15   8    0.98    1.48
   1 -15  -8    1.20    1.36
   1 -15  -8    2.74    2.26
  -1  15   8    2.51    2.09
   1  15  -8    3.09    4.08
   1  15  -8    4.52    4.45
   0 -15  -8   29.08    2.20
   0 -15   8   25.25    2.54
   0 -15   8   25.83    1.72
   0 -15   8   27.84    2.70
   0 -15  -8   28.40    3.69
   0  15   8   26.90    3.11
  -1 -15  -8   11.33    3.04
   1 -15   8   13.13    1.95
  -1 -15  -8   10.99    1.71
   1 -15   8   10.98    1.65
   1 -15   8   10.49    2.00
   1  15   8   15.78    4.79
   1  15   8   11.78    2.57
  -1  15  -8   12.71    6.36
  -2 -15  -8   18.77    3.82
   2 -15   8   12.71    2.20
  -2 -15  -8   15.24    1.92
   2 -15   8   16.36    2.28
  -2  15  -8   29.74    6.40
   2  15   8   14.03    4.03
   2  15   8   19.38    3.06
   3 -15   8    1.50    2.06
   3 -15   8    4.90    2.03
  -3 -15  -8    4.56    3.53
   3  15   8    7.96    2.96
   3 -16  -8   14.32    2.22
   3  16  -8   -1.05    4.69
  -2 -16   8    4.61    2.71
  -2 -16   8    0.36    1.59
   2 -16  -8    3.44    1.68
   2 -16  -8    2.90    2.27
   2  16  -8    4.26    3.81
   2  16  -8   -0.72    4.17
  -2  16   8    6.42    2.48
  -1 -16   8   -1.42    1.49
   1 -16  -8   -0.72    1.45
   1 -16  -8   -0.92    2.27
  -1 -16   8    1.16    2.25
   1  16  -8    5.93    4.55
  -1  16   8    1.65    2.09
   1  16  -8    0.06    3.83
   1 -16   8   18.32    1.91
  -1 -16  -8   15.84    2.11
   1 -16   8   15.11    2.17
  -1 -16  -8   17.16    3.46
  -1  16  -8   27.94    7.55
   1  16   8   17.49    2.82
   1  16   8   24.14    5.19
  -2 -16  -8    1.05    1.29
   2 -16   8   -0.56    1.83
   2 -16   8   -0.34    1.51
  -2 -16  -8    0.66    3.37
   2  16   8    3.31    4.06
   2  16   8    4.67    2.52
  -2  16  -8   10.65    5.88
   3 -16   8   11.91    2.49
  -3 -16  -8   15.53    4.03
   3 -16   8    6.39    2.40
   3  16   8   14.22    3.24
   3 -17  -8   -1.32    1.71
  -3 -17   8    5.46    3.09
  -2 -17   8    2.06    2.70
   2 -17  -8   -0.96    1.63
  -2  17   8    0.64    2.27
   2  17  -8    3.58    4.24
  -1 -17   8   41.48    2.80
  -1 -17   8   51.32    3.84
   1 -17  -8   44.66    4.17
   1 -17  -8   50.37    3.09
   1  17  -8   40.87    7.20
   1  17  -8   59.38    7.81
  -1  17   8   48.64    3.65
   0 -17  -8   12.42    1.97
   0 -17  -8    9.67    3.02
   0 -17   8   10.09    2.06
   0 -17   8   14.96    2.44
   0  17   8   14.32    2.72
  -1 -17  -8   26.46    3.94
   1 -17   8   20.35    2.52
  -1 -17  -8   21.07    2.34
   1 -17   8   21.09    2.05
  -1  17  -8   40.47    9.18
   1  17   8   25.30    3.24
  -2 -17  -8   10.71    1.75
   2 -17   8    6.33    2.15
   2 -17   8   13.54    2.27
  -2 -17  -8   14.88    3.95
   2  17   8   16.41    3.11
   2  17   8    3.07    4.56
  -3 -17  -8    0.19    3.78
   3  17   8    2.08    2.71
   2 -18  -8   -0.92    1.68
  -2 -18   8    2.51    2.82
  -2  18   8    1.62    2.27
   2  18  -8   -3.24    4.41
   1 -18  -8    1.72    2.67
   1 -18  -8    2.18    1.70
  -1 -18   8    6.77    2.62
  -1 -18   8   -0.27    1.84
   1  18  -8   -4.24    4.11
  -1  18   8    5.24    2.48
   1 -18   8    4.50    2.08
   1 -18   8    6.70    1.63
  -1 -18  -8    7.09    1.78
  -1 -18  -8    6.99    3.47
  -1  18  -8   14.60    7.78
   1  18   8    7.89    2.65
   2 -18   8   -0.55    1.52
  -2 -18  -8   -0.52    1.46
  -2 -18  -8    1.17    3.58
   2  18   8    3.41    2.58
   2  18   8   -3.89    4.89
   2 -19  -8    2.26    1.95
  -2 -19   8   12.63    3.23
  -2  19   8    4.89    2.66
   2  19  -8    0.26    5.12
   1 -19  -8    0.86    2.82
  -1 -19   8    5.34    2.65
  -1 -19   8   -1.68    1.93
   1 -19  -8    2.74    1.81
  -1  19   8    5.78    2.53
   0 -19  -8    4.73    1.86
   0 -19  -8    4.25    3.04
   0 -19   8    7.38    2.36
   0  19   8    9.64    2.77
  -1 -19  -8    0.33    1.59
   1 -19   8    2.67    1.47
   1 -19   8   -2.51    1.99
  -1 -19  -8    2.23    3.37
   1  19   8    5.02    2.73
  -1  19  -8    2.75    7.81
  -2 -19  -8    3.44    3.87
   2 -19   8   -3.70    2.10
   2 -19   8    1.29    1.76
   2  19   8    3.00    2.67
   2  19   8   -4.60    5.47
  -2 -20   8    6.26    3.15
   2 -20  -8   -2.98    1.82
  -2  20   8    0.66    2.48
   2  20  -8   -3.10    5.30
   1 -20  -8    3.12    3.06
   1 -20  -8    6.94    2.15
  -1 -20   8   10.81    2.95
  -1 -20   8    0.49    2.11
  -1  20   8   10.25    2.89
   1  20  -8   -3.49    4.52
   0 -20  -8   -1.94    3.10
   0 -20   8   -4.60    1.88
   0 -20  -8    0.05    1.72
   0 -20   8    3.65    2.16
   0  20   8    3.57    2.68
  -1 -20  -8    9.05    2.12
   1 -20   8   11.84    2.09
  -1 -20  -8   14.94    4.14
   1 -20   8    6.11    2.45
   1  20   8   17.40    3.29
  -1  20  -8   29.65    9.12
  -1 -21   8   23.31    3.98
   1 -21  -8   13.08    2.53
   1 -21  -8   12.02    3.58
  -1 -21   8    5.61    2.43
  -1  21   8   19.09    3.41
   1  21  -8   17.13    5.64
   0 -21  -8    4.31    3.45
   0 -21   8   -3.08    2.18
   0 -21   8    7.09    2.40
   0 -21  -8    2.74    2.04
   0  21   8    6.78    2.90
   1 -21   8    1.75    2.36
  -1 -21  -8   10.56    4.11
  -1 -21  -8    8.02    2.19
   1  21   8   16.53    3.36
  -1  21  -8   29.55    9.62
   5   0  -9   16.62    3.01
  -4   0   9   -1.18    2.88
  -4   0   9   -0.52    1.50
   4   0  -9    0.69    1.42
   3   0  -9   18.77    2.17
  -3   0   9   17.53    3.37
   3   0  -9   18.17    1.33
  -3   0   9   17.11    2.05
  -2   0   9   -0.49    0.80
  -2   0   9    0.02    1.16
   2   0  -9   -0.04    0.66
   2   0  -9   -0.06    0.50
  -1   0   9  226.63    4.27
  -1   0   9  228.40    5.20
   1   0  -9  228.56    5.26
  -1   0   9  223.96    4.20
   1   0  -9  229.53    6.74
   0   0   9    1.10    1.12
   0   0   9   -0.24    0.86
   0   0   9   -0.28    0.97
   0   0  -9    2.89    2.04
   1   0   9  736.96   14.53
   1   0   9  715.45   12.54
   1   0   9  738.12   10.96
  -1   0  -9  702.13   17.18
   2   0   9    0.30    1.09
   2   0   9   -0.12    0.68
   2   0   9    1.56    1.57
  -2   0  -9   -0.69    1.10
  -2   0  -9   -0.84    1.65
   3   0   9   47.31    3.01
  -3   0  -9   47.49    4.60
   3   0   9   49.85    2.34
   3   0   9   48.58    3.33
  -4   0  -9    1.79    3.12
   4   0   9   -2.33    2.36
   4   0   9   -1.44    1.36
  -5  -1   9   16.93    5.63
   5  -1  -9    8.69    2.52
  -5   1   9   19.10    5.69
   5   1  -9    6.28    2.53
   4  -1  -9   10.26    1.57
  -4  -1   9   12.78    2.05
  -4  -1   9   15.31    3.97
   4  -1  -9   10.34    2.03
  -4   1   9   13.83    2.08
  -4   1   9   13.70    3.77
   4   1  -9   10.85    2.20
  -3  -1   9    3.92    1.66
   3  -1  -9    4.62    1.05
   3  -1  -9    3.57    1.24
  -3  -1   9    5.55    2.33
  -3   1   9    2.99    1.56
   3   1  -9    5.00    1.00
   3   1  -9    4.49    1.35
  -3   1   9    4.78    2.13
  -3   1   9    4.31    1.00
  -2  -1   9    2.03    1.22
   2  -1  -9    3.02    0.87
  -2  -1   9    3.05    0.93
   2   1  -9    4.20    0.63
  -2   1   9    3.88    1.33
  -2   1   9    2.65    1.53
   2   1  -9    2.99    0.94
   2   1  -9    2.21    1.31
  -2   1   9    3.22    0.94
   1  -1  -9   91.31    3.59
  -1  -1   9   89.75    2.41
  -1  -1   9   89.67    2.05
  -1  -1   9   89.63    2.94
   1  -1  -9   92.69    2.65
  -1   1   9   89.46    2.44
   1   1  -9   91.22    3.91
   1   1  -9   92.66    2.73
  -1   1   9   90.47    2.35
  -1   1   9   89.11    2.87
   0  -1  -9   18.31    3.00
   0  -1   9   13.30    1.28
   0  -1   9   12.93    1.51
   0  -1   9   13.37    1.37
   0   1  -9   20.42    3.76
   0   1   9   11.74    1.41
   0   1   9   13.14    1.69
   0   1   9   12.03    1.49
   1  -1   9   59.31    1.89
   1  -1   9   61.48    2.34
  -1  -1  -9   55.80    2.22
  -1  -1  -9   57.51    3.19
   1  -1   9   61.55    2.13
   1  -1   9   61.30    2.28
   1   1   9   59.15    2.10
  -1   1  -9   58.21    3.89
   1   1   9   57.62    1.98
   1   1   9   57.82    2.43
  -2  -1  -9   41.07    3.16
  -2  -1  -9   42.52    2.14
   2  -1   9   44.81    2.48
   2  -1   9   43.34    1.98
   2  -1   9   43.18    2.18
  -2   1  -9   41.46    1.97
  -2   1  -9   42.53    3.50
   2   1   9   42.61    2.46
   2   1   9   43.50    2.01
   2   1   9   40.96    2.19
  -3  -1  -9   23.23    3.88
   3  -1   9   20.56    2.67
   3  -1   9   21.43    2.33
   3  -1   9   21.37    2.08
   3   1   9   21.48    2.30
   3   1   9   22.25    2.02
  -3   1  -9   18.93    4.32
   3   1   9   24.62    3.05
   4  -1   9    4.27    1.78
   4  -1   9    5.56    2.71
   4   1   9    3.62    1.82
   4   1   9    6.03    2.71
   5  -2  -9    2.47    2.01
  -5   2   9    2.54    4.91
   5   2  -9   -1.59    2.14
   4  -2  -9    1.13    1.16
  -4  -2   9    1.31    1.71
   4  -2  -9    0.45    1.30
  -4  -2   9    0.36    3.06
   4   2  -9   -1.08    1.51
  -4   2   9   -1.06    2.76
   3  -2  -9  128.81    3.43
   3  -2  -9  129.07    4.92
  -3  -2   9  122.06    4.11
  -3   2   9  129.77    3.00
   3   2  -9  129.51    3.11
  -3   2   9  132.13    6.03
   3   2  -9  132.07    5.04
  -3   2   9  128.94    4.00
  -2  -2   9    1.28    1.28
   2  -2  -9    1.36    0.76
  -2  -2   9    1.80    0.86
  -2   2   9    1.78    1.36
  -2   2   9    1.47    0.90
   2   2  -9    1.70    0.50
   2   2  -9    1.53    1.34
  -2   2   9    2.24    0.93
  -2   2   9    2.24    1.27
   2   2  -9    1.47    0.91
  -1  -2   9  196.69    3.40
   1  -2  -9  186.82    5.67
  -1  -2   9  187.54    3.66
  -1  -2   9  186.51    4.57
  -1   2   9  192.76    4.06
  -1   2   9  192.60    4.68
   1   2  -9  195.85    6.33
  -1   2   9  189.41    3.80
   1   2  -9  194.69    4.77
   0  -2   9   18.64    1.62
   0  -2   9   20.12    1.34
   0  -2  -9   21.37    2.71
   0  -2   9   18.42    1.51
   0   2  -9   23.78    3.82
   0   2   9   20.08    1.88
   0   2   9   18.02    1.79
   0   2   9   18.70    1.54
  -1  -2  -9    3.60    1.43
   1  -2   9    2.82    1.08
  -1  -2  -9    3.93    1.23
   1  -2   9    3.53    1.10
   1  -2   9    4.47    1.19
   1   2   9    6.08    1.60
  -1   2  -9    2.76    2.13
   1   2   9    3.28    1.08
   1   2   9    4.13    0.81
   2  -2   9   33.72    2.25
  -2  -2  -9   33.25    2.20
   2  -2   9   37.18    2.05
   2  -2   9   33.29    1.95
  -2  -2  -9   32.80    2.76
   2   2   9   32.84    2.10
   2   2   9   36.15    2.62
  -2   2  -9   31.54    3.50
   2   2   9   32.29    1.90
  -2   2  -9   34.86    1.74
  -3  -2  -9   32.80    2.56
   3  -2   9   31.35    2.60
   3  -2   9   36.72    2.30
   3  -2   9   34.63    2.69
  -3  -2  -9   34.73    3.82
   3   2   9   34.93    2.13
  -3   2  -9   34.20    4.85
   3   2   9   33.62    3.00
   3   2   9   32.48    2.84
   4  -2   9    1.47    1.55
   4  -2   9    0.15    2.38
  -4  -2  -9    6.64    3.09
  -4   2  -9    7.57    3.68
   4   2   9    0.34    1.69
   4   2   9    0.39    2.59
   5  -3  -9   -1.49    1.66
  -5   3   9   -2.13    4.37
   4  -3  -9   11.56    1.67
  -4  -3   9   13.89    2.37
   4  -3  -9   12.09    2.15
   4   3  -9   11.75    2.33
  -4   3   9   16.09    4.01
   3  -3  -9   39.17    1.92
   3  -3  -9   38.77    2.70
  -3  -3   9   38.84    2.83
   3   3  -9   38.51    3.64
  -3   3   9   41.04    3.80
  -3   3   9   40.38    1.92
  -3   3   9   38.91    2.44
   3   3  -9   39.47    3.04
  -2  -3   9   -0.73    1.29
  -2  -3   9    0.04    0.82
  -2   3   9    0.68    0.92
   2   3  -9   -0.54    1.35
  -2   3   9    0.41    0.95
  -2   3   9   -0.28    1.16
  -2   3   9   -0.96    1.22
   2   3  -9    0.56    0.97
  -1  -3   9  184.45    3.66
  -1  -3   9  186.19    4.58
   1  -3  -9  191.65    5.56
  -1   3   9  195.06    3.89
   1   3  -9  185.79    6.42
  -1   3   9  190.28    4.71
   1   3  -9  187.25    4.82
  -1   3   9  192.92    4.19
   0  -3   9   61.32    1.80
   0  -3  -9   61.92    3.13
   0  -3   9   60.76    2.09
   0  -3   9   64.54    2.32
   0   3   9   61.37    2.16
   0   3  -9   61.57    5.04
   0   3   9   61.86    2.63
   0   3   9   64.01    2.71
   1  -3   9    1.33    1.00
  -1  -3  -9    1.92    1.20
  -1  -3  -9    0.71    1.11
   1  -3   9    2.05    1.06
   1  -3   9    0.83    0.99
   1   3   9    2.50    0.92
   1   3   9    3.10    1.63
   1   3   9    1.50    1.03
  -1   3  -9    1.00    2.20
  -2  -3  -9   27.20    2.26
  -2  -3  -9   27.17    2.55
   2  -3   9   26.76    1.98
   2  -3   9   29.95    1.90
   2   3   9   27.29    2.13
   2   3   9   28.14    1.90
   2   3   9   27.08    2.37
  -2   3  -9   28.57    1.56
  -2   3  -9   23.60    3.62
   3  -3   9   74.40    3.45
  -3  -3  -9   76.90    3.41
   3  -3   9   83.91    3.01
  -3  -3  -9   80.94    4.63
   3  -3   9   78.92    3.70
   3   3   9   80.21    2.61
  -3   3  -9   87.39    6.24
   3   3   9   82.61    4.07
   3   3   9   74.11    3.70
  -4  -3  -9    9.21    2.92
   4  -3   9    5.70    2.63
   4  -3   9    4.87    1.72
   4   3   9    4.79    2.83
   4   3   9    2.15    1.94
  -4   3  -9   14.12    4.43
  -5   4   9   18.77    5.52
  -4  -4   9    6.94    2.16
   4  -4  -9    8.25    1.57
   4  -4  -9    5.65    1.76
   4   4  -9    3.28    1.88
  -4   4   9    7.43    3.43
   4   4  -9   10.02    3.12
   3  -4  -9    0.34    0.90
  -3  -4   9   -0.50    1.69
   3  -4  -9    0.84    1.01
   3   4  -9   -0.13    1.34
  -3   4   9    0.43    1.72
   3   4  -9   -1.10    1.70
  -3   4   9    0.48    1.52
  -2  -4   9    0.67    1.42
  -2  -4   9    0.29    0.83
   2   4  -9    0.49    1.43
  -2   4   9    0.14    1.38
  -2   4   9    0.01    0.98
  -2   4   9    0.64    1.03
  -2   4   9    0.36    1.22
   2   4  -9    0.81    1.12
  -1  -4   9  173.85    4.41
  -1  -4   9  171.43    3.49
   1   4  -9  171.49    4.73
  -1   4   9  177.05    3.74
   1   4  -9  172.44    6.32
  -1   4   9  177.61    4.57
  -1   4   9  172.81    4.02
   0  -4   9    6.41    0.89
   0  -4  -9    3.78    1.30
   0  -4   9    5.55    1.24
   0  -4   9    4.85    1.15
   0  -4  -9    9.28    2.14
   0   4  -9    8.05    2.97
   0   4   9    5.72    1.61
   0   4   9    4.80    1.18
  -1  -4  -9  298.33    7.31
   1  -4   9  299.03    5.89
   1  -4   9  294.65    5.34
  -1  -4  -9  297.46    6.41
   1  -4   9  293.44    5.82
   1   4   9  282.17    6.26
  -1   4  -9  289.88    9.15
   1   4   9  281.43    6.80
   1   4   9  302.64    5.36
  -2  -4  -9    0.82    1.23
   2  -4   9    2.44    1.37
   2  -4   9    0.78    1.28
  -2  -4  -9    1.19    1.55
  -2   4  -9   -2.64    2.38
   2   4   9    3.44    2.11
   2   4   9    1.12    1.15
   2   4   9    0.63    1.08
  -2   4  -9    1.02    0.91
   3  -4   9   24.41    2.71
  -3  -4  -9   23.53    2.70
   3  -4   9   24.26    2.24
   3  -4   9   24.81    2.40
  -3  -4  -9   23.57    3.08
  -3   4  -9   27.70    5.20
   3   4   9   24.64    2.94
   3   4   9   23.40    2.92
   4  -4   9   -3.11    2.12
  -4  -4  -9    0.75    2.20
   4  -4   9   -0.31    1.31
  -4   4  -9    7.05    4.33
   4   4   9   -0.24    2.67
   4  -5  -9   32.84    2.32
  -4  -5   9   37.27    3.55
   4  -5  -9   35.59    3.26
  -4   5   9   35.55    5.24
   4   5  -9   39.51    5.20
   4   5  -9   27.70    3.61
   3  -5  -9    5.22    1.05
   3  -5  -9    6.00    1.31
  -3  -5   9    5.66    1.97
   3   5  -9    4.11    1.73
  -3   5   9    6.59    1.83
   3   5  -9    5.93    2.35
  -3   5   9    5.23    2.04
  -2  -5   9   12.56    1.34
  -2  -5   9   12.10    1.88
   2   5  -9   15.20    2.37
  -2   5   9   13.55    1.51
  -2   5   9   13.41    2.14
  -2   5   9   12.48    1.69
   2   5  -9   14.53    2.70
  -2   5   9   14.57    2.13
  -1  -5   9    8.74    1.12
  -1  -5   9    9.40    1.55
   1   5  -9    8.87    2.20
  -1   5   9    7.10    1.38
  -1   5   9    8.72    1.23
   1   5  -9    8.54    1.49
  -1   5   9    8.53    1.42
  -1   5   9    8.10    1.60
   0  -5   9    5.71    0.92
   0  -5  -9    4.27    1.27
   0  -5   9    6.30    1.22
   0  -5   9    5.74    1.25
   0   5  -9    7.77    3.09
   0   5   9    5.35    1.16
   0   5   9    6.87    1.70
   1  -5   9   11.00    1.25
   1  -5   9   11.86    1.36
   1  -5   9   12.44    1.45
  -1  -5  -9   11.34    1.81
  -1  -5  -9   10.43    1.14
   1   5   9   12.47    2.08
   1   5   9   10.73    1.45
  -1   5  -9   13.42    2.92
   1   5   9   12.44    2.03
   2  -5   9   39.03    2.34
   2  -5   9   38.12    2.28
  -2  -5  -9   38.31    2.70
  -2  -5  -9   37.23    2.47
  -2   5  -9   35.08    4.83
   2   5   9   37.09    2.72
  -2   5  -9   37.77    1.57
   2   5   9   36.45    1.95
   2   5   9   39.47    3.14
  -3  -5  -9    0.73    1.96
  -3  -5  -9    1.78    1.63
   3  -5   9    1.58    1.83
   3  -5   9    2.14    1.50
   3   5   9    1.07    1.55
   3   5   9    3.05    2.51
  -3   5  -9    3.93    3.08
   4  -5   9   13.22    2.66
  -4  -5  -9   17.24    3.96
   4  -5   9   10.93    2.85
   4   5   9    9.64    3.15
   4   5   9    7.44    2.45
   4  -6  -9    1.80    1.29
   4  -6  -9    1.29    1.36
  -4  -6   9    3.78    2.21
   4   6  -9   -2.40    1.88
  -4   6   9    1.59    3.06
   4   6  -9    0.98    2.80
  -3  -6   9   31.05    3.03
   3  -6  -9   31.54    1.75
   3  -6  -9   30.87    2.04
  -3   6   9   30.92    2.55
   3   6  -9   36.17    4.06
  -3   6   9   30.52    3.43
   3   6  -9   34.68    3.43
  -2  -6   9    4.76    0.99
  -2  -6   9    3.54    1.75
   2   6  -9    5.07    2.08
  -2   6   9    5.54    1.24
   2   6  -9    4.68    1.63
  -2   6   9    4.99    1.72
  -2   6   9    2.74    1.38
  -2   6   9    3.94    1.44
  -1  -6   9   79.95    2.33
  -1  -6   9   82.70    3.03
  -1   6   9   80.10    3.09
   1   6  -9   82.70    3.74
  -1   6   9   81.63    2.59
   1   6  -9   82.37    4.75
  -1   6   9   81.89    2.84
   0  -6   9    0.86    1.12
   0  -6  -9    0.66    1.33
   0  -6   9    0.63    0.96
   0  -6   9    1.19    0.66
   0   6   9    0.95    1.42
   0   6  -9    3.93    2.83
   0   6   9   -0.39    1.04
   1  -6   9    1.41    1.07
   1  -6   9    2.17    1.01
  -1  -6  -9    2.06    0.57
   1  -6   9    2.64    0.96
  -1  -6  -9    2.47    1.50
  -1   6  -9    2.99    2.79
   1   6   9    3.08    1.51
   1   6   9    2.41    1.07
   1   6   9    1.95    1.87
   2  -6   9    2.84    1.28
  -2  -6  -9    1.53    1.09
   2  -6   9    2.92    1.37
  -2  -6  -9    3.45    1.97
   2   6   9    6.76    2.39
   2   6   9    2.23    1.50
  -2   6  -9    1.43    2.85
   2   6   9    2.71    1.17
   3  -6   9    5.95    2.01
  -3  -6  -9    7.06    2.29
  -3  -6  -9    5.00    1.74
   3  -6   9    4.58    1.62
   3   6   9    4.34    1.87
   3   6   9    8.65    2.74
  -3   6  -9   10.25    3.65
   4  -6   9    4.22    1.62
   4  -6   9    0.33    2.32
  -4   6  -9   11.09    5.05
   4   6   9    0.68    2.99
   4   6   9    0.52    2.14
  -4  -7   9   19.68    3.38
   4  -7  -9   16.11    2.57
   4  -7  -9   13.72    1.90
   4   7  -9   19.30    4.11
  -4   7   9   21.71    4.46
   4   7  -9    9.95    2.63
  -3  -7   9   19.27    2.96
   3  -7  -9   20.60    1.83
   3  -7  -9   20.23    1.66
  -3   7   9   21.92    3.43
   3   7  -9   21.90    3.41
   3   7  -9   19.29    3.81
  -3   7   9   21.31    2.41
  -2  -7   9   59.42    3.18
  -2  -7   9   59.70    2.10
   2   7  -9   61.23    4.35
  -2   7   9   62.89    2.76
   2   7  -9   64.82    3.80
  -2   7   9   59.77    3.34
  -2   7   9   62.87    2.46
  -2   7   9   64.24    3.01
  -1  -7   9   17.30    2.02
  -1  -7   9   17.98    1.67
   1  -7  -9   18.79    1.92
  -1   7   9   17.09    1.59
  -1   7   9   16.96    1.94
  -1   7   9   16.33    1.75
   1   7  -9   19.02    3.65
   1   7  -9   24.24    3.40
   0  -7  -9    4.95    1.58
   0  -7   9    4.84    1.17
   0  -7   9    6.26    1.36
   0  -7   9    4.86    0.78
   0   7   9    6.04    1.29
   0   7   9    6.19    1.59
   0   7  -9    6.06    3.02
   1  -7   9    7.74    1.17
   1  -7   9    7.41    1.21
   1  -7   9    5.77    1.35
  -1  -7  -9    6.70    1.62
   1   7   9    8.00    2.14
   1   7   9    8.95    1.92
   1   7   9    7.14    1.27
  -1   7  -9    9.33    3.10
  -2  -7  -9   49.09    2.52
  -2  -7  -9   49.71    3.35
   2  -7   9   51.64    2.52
   2  -7   9   51.31    2.51
   2   7   9   50.13    2.22
   2   7   9   54.04    3.70
   2   7   9   52.53    3.64
  -2   7  -9   49.25    5.18
   3  -7   9   21.97    2.39
  -3  -7  -9   21.61    2.66
  -3  -7  -9   23.50    3.33
   3  -7   9   22.64    2.54
   3   7   9   24.41    3.53
   3   7   9   20.92    3.27
  -3   7  -9   28.38    5.69
   4  -7   9   29.06    3.08
   4  -7   9   20.80    3.15
   4   7   9   15.96    3.17
   4   7   9   22.67    3.66
   4  -8  -9    8.00    1.79
  -4  -8   9   15.60    2.95
   4   8  -9    5.69    2.61
   4   8  -9    9.37    3.89
  -4   8   9   14.52    4.20
   3  -8  -9    1.29    1.21
   3  -8  -9    1.04    1.05
  -3  -8   9    0.60    2.12
   3   8  -9    1.99    2.41
   3   8  -9    2.63    2.04
  -3   8   9    1.96    1.76
  -2  -8   9    2.74    1.68
   2  -8  -9    3.14    1.57
  -2  -8   9    2.72    1.08
  -2   8   9    3.12    1.33
   2   8  -9    3.40    2.37
   2   8  -9    4.94    2.02
  -2   8   9    3.33    1.39
  -2   8   9    3.35    1.61
   1  -8  -9   19.82    2.12
  -1  -8   9   19.88    1.98
  -1  -8   9   20.85    1.67
  -1   8   9   19.21    2.11
  -1   8   9   20.40    1.89
  -1   8   9   20.30    1.65
   1   8  -9   28.68    4.18
   1   8  -9   23.57    4.19
   0  -8   9    4.51    0.77
   0  -8   9    4.02    1.22
   0  -8   9    4.26    1.37
   0  -8  -9    4.08    1.62
   0   8  -9    5.81    3.00
   0   8   9    2.80    1.25
   0   8   9    3.77    1.78
   1  -8   9    8.25    1.27
  -1  -8  -9    7.57    1.98
   1  -8   9    7.49    1.18
   1  -8   9    7.20    1.45
   1   8   9    6.20    1.32
   1   8   9    7.44    2.27
  -1   8  -9    9.86    3.56
   1   8   9    5.54    2.17
   2  -8   9   14.83    2.10
  -2  -8  -9   11.58    2.43
   2  -8   9   12.06    1.71
   2   8   9   11.73    1.46
   2   8   9   15.33    2.79
   2   8   9   10.59    2.20
  -2   8  -9   14.43    3.72
  -3  -8  -9    0.86    2.30
   3  -8   9   -0.11    1.47
   3  -8   9    0.22    1.62
   3   8   9    2.15    2.63
  -3   8  -9    3.23    3.62
   3   8   9   -1.45    1.99
   4  -8   9   -1.45    2.07
   4  -8   9    1.94    1.34
   4   8   9   -1.57    3.03
  -4   8  -9   12.31    5.64
   4  -9  -9   33.19    2.57
   4   9  -9   23.74    4.43
  -4   9   9   36.76    5.74
   4   9  -9   30.30    5.73
   3  -9  -9    1.74    1.60
   3  -9  -9    0.57    1.11
  -3  -9   9    0.99    2.09
   3  -9  -9    1.57    1.27
   3   9  -9    0.16    2.22
   3   9  -9    1.15    2.54
  -3   9   9    0.36    1.69
   2  -9  -9    1.23    1.66
  -2  -9   9    0.39    1.12
  -2  -9   9    0.54    1.87
   2   9  -9    1.55    2.50
  -2   9   9    0.97    1.27
   2   9  -9    4.45    2.24
  -2   9   9    0.84    1.60
  -1  -9   9    5.90    1.28
  -1  -9   9    4.08    1.68
  -1  -9   9    4.91    0.52
   1  -9  -9    6.13    1.75
  -1   9   9    5.13    1.06
  -1   9   9    6.16    1.47
   1   9  -9    9.87    2.69
  -1   9   9    5.29    1.81
   1   9  -9    7.56    3.16
   0  -9   9   15.54    1.04
   0  -9   9   15.52    1.84
   0  -9  -9   15.77    2.29
   0  -9   9   16.04    2.00
   0   9  -9   17.78    3.76
   0   9   9   15.49    2.39
   0   9   9   17.22    1.91
   1  -9   9    5.22    1.15
  -1  -9  -9    5.19    1.99
   1  -9   9    4.37    1.42
   1  -9   9    5.04    1.31
  -1   9  -9    8.79    3.87
   1   9   9    6.40    2.66
   1   9   9    4.34    2.27
   1   9   9    3.88    1.31
   2  -9   9   14.67    1.81
  -2  -9  -9   19.99    2.96
   2  -9   9   16.84    2.25
   2   9   9   20.38    3.87
   2   9   9   16.69    1.86
   2   9   9   22.31    3.17
  -2   9  -9   15.50    3.98
   3  -9   9    1.44    1.64
  -3  -9  -9   -0.98    2.51
   3  -9   9   -0.80    1.61
   3   9   9    2.42    2.67
  -3   9  -9    6.31    4.25
   3   9   9   -1.43    2.19
   4  -9   9   -2.82    2.02
  -4  -9  -9    1.49    2.62
   4   9   9   -5.08    2.93
   4 -10  -9   15.98    2.22
  -4 -10   9   24.60    3.89
   4  10  -9   17.93    4.38
  -4  10   9   27.05    5.09
  -3 -10   9   22.21    3.32
   3 -10  -9   19.95    1.99
   3  10  -9   18.42    3.76
   3  10  -9   18.20    3.12
  -3  10   9   18.15    3.40
  -2 -10   9    2.25    2.07
  -2 -10   9    2.07    1.25
   2 -10  -9    2.83    1.76
   2 -10  -9    2.52    1.22
  -2  10   9    2.15    1.36
  -2  10   9    2.27    1.82
   2  10  -9    4.35    2.92
   2  10  -9    5.13    2.54
   1 -10  -9    3.79    1.73
  -1 -10   9    3.25    1.35
  -1 -10   9    3.84    1.75
   1  10  -9    7.27    3.51
  -1  10   9    4.48    1.86
  -1  10   9    4.02    1.03
  -1  10   9    4.30    1.36
   1  10  -9    6.45    3.03
   0 -10  -9  104.48    4.00
   0 -10   9  104.12    2.64
   0 -10   9  106.29    3.58
   0 -10   9  107.71    3.23
   0  10  -9   98.67    7.31
   0  10   9  101.53    3.91
   0  10   9  102.56    3.16
   1 -10   9   -0.01    0.89
  -1 -10  -9    1.04    2.10
   1 -10   9   -0.80    1.32
   1 -10   9    0.69    1.25
   1  10   9    0.35    2.17
  -1  10  -9   -0.47    3.98
   1  10   9    1.61    3.00
   1  10   9    0.01    1.25
  -2 -10  -9   46.15    3.82
   2 -10   9   46.79    2.76
   2 -10   9   47.61    2.58
   2  10   9   48.60    4.92
   2  10   9   49.98    2.45
   2  10   9   48.72    3.90
  -2  10  -9   44.33    6.40
   3 -10   9   -0.86    1.65
  -3 -10  -9    2.37    2.64
   3 -10   9   -0.67    1.61
   3  10   9   -2.30    2.46
  -3  10  -9    4.77    4.44
   3  10   9    3.05    2.73
  -4 -10  -9    3.59    2.78
   4 -10   9   -1.33    2.10
   4  10   9   -3.81    3.26
   4 -11  -9   14.20    2.27
  -4 -11   9   24.53    4.06
   4  11  -9   11.56    4.26
  -4  11   9   22.19    4.53
   3 -11  -9    5.27    1.40
  -3 -11   9    4.75    2.44
  -3  11   9    5.72    2.13
   3  11  -9    2.49    2.75
   3  11  -9    2.77    3.01
  -2 -11   9  117.00    3.22
  -2 -11   9  122.04    4.77
   2 -11  -9  114.33    3.54
   2 -11  -9  122.29    4.31
  -2  11   9  117.88    4.84
   2  11  -9  118.31    6.27
   2  11  -9  117.98    7.04
  -2  11   9  119.06    4.36
   1 -11  -9    0.97    1.89
  -1 -11   9    1.39    1.35
  -1 -11   9   -0.74    1.71
   1  11  -9    4.20    3.72
  -1  11   9    0.12    0.83
  -1  11   9    0.51    1.80
   1  11  -9    2.89    3.44
   0 -11   9   47.23    2.76
   0 -11   9   46.49    2.51
   0 -11  -9   50.08    3.34
   0 -11   9   45.63    1.76
   0  11   9   45.20    3.17
   0  11  -9   49.30    6.78
   0  11   9   45.70    2.59
   1 -11   9    0.78    1.39
   1 -11   9    0.36    1.29
   1 -11   9   -0.23    0.88
  -1 -11  -9    2.00    2.30
   1  11   9    5.54    3.37
  -1  11  -9    5.15    4.55
   1  11   9    0.45    1.32
   1  11   9   -0.47    2.14
  -2 -11  -9   31.83    3.80
   2 -11   9   32.64    2.39
   2 -11   9   30.69    2.58
   2  11   9   32.28    3.62
   2  11   9   31.20    2.24
  -2  11  -9   37.18    5.36
   2  11   9   31.02    5.01
  -3 -11  -9    1.36    2.86
   3 -11   9    2.19    1.84
   3 -11   9    0.63    1.79
   3  11   9    4.34    2.89
  -3  11  -9    9.14    5.09
   3  11   9   -3.35    2.56
   4 -11   9   39.05    3.68
  -4 -11  -9   44.65    5.04
   4  11   9   28.46    4.42
  -4 -12   9   27.64    4.27
   4 -12  -9   16.94    2.56
  -4  12   9   26.02    5.08
   4  12  -9   14.37    4.53
   3 -12  -9   -0.89    1.28
  -3 -12   9    2.65    2.42
   3  12  -9   -0.33    2.75
  -3  12   9    1.03    1.82
   3  12  -9   -1.24    3.09
   2 -12  -9   64.39    2.87
   2 -12  -9   68.05    3.51
  -2 -12   9   65.84    3.95
  -2 -12   9   62.93    2.58
   2  12  -9   63.24    5.56
  -2  12   9   64.72    3.56
   2  12  -9   63.25    6.09
  -2  12   9   65.71    3.49
  -1 -12   9    1.36    1.97
  -1 -12   9    1.98    1.43
   1 -12  -9    1.76    1.20
   1 -12  -9    4.05    2.12
   1  12  -9    7.37    3.96
   1  12  -9    9.87    4.27
  -1  12   9    3.22    2.14
   0 -12  -9    8.82    2.37
   0 -12   9    8.49    1.72
   0 -12   9    7.10    1.83
   0 -12   9    6.44    1.05
   0  12   9    7.19    2.27
   0  12  -9   10.56    4.30
   0  12   9    6.42    1.68
   1 -12   9    9.22    1.70
   1 -12   9    9.41    1.86
   1 -12   9    9.95    1.47
  -1 -12  -9    8.77    2.53
   1  12   9    8.72    2.39
  -1  12  -9   13.72    5.25
   1  12   9    7.98    1.71
   1  12   9   10.88    4.43
   2 -12   9    5.18    1.72
  -2 -12  -9    3.74    2.76
   2 -12   9    4.87    1.54
   2  12   9    4.96    2.94
   2  12   9    3.87    1.44
   2  12   9    4.36    2.67
  -2  12  -9    9.06    4.37
  -3 -12  -9   -0.21    2.94
   3 -12   9   -1.16    1.69
   3 -12   9   -0.36    1.60
   3  12   9    2.78    2.70
  -3  12  -9    7.88    5.36
   4 -12   9   -0.51    2.33
  -4 -12  -9    2.74    3.36
   4  12   9   -3.52    3.29
  -4 -13   9   13.13    3.38
   4 -13  -9    8.16    2.14
  -4  13   9   10.52    3.84
  -3 -13   9    3.27    2.63
   3 -13  -9   -1.00    1.33
   3  13  -9   -3.22    2.89
  -3  13   9    0.89    1.88
   3  13  -9   -2.64    3.43
  -2 -13   9    8.48    2.49
  -2 -13   9    6.33    1.54
   2 -13  -9    6.22    2.09
   2 -13  -9    7.02    1.57
   2  13  -9    6.84    3.17
   2  13  -9    5.21    3.80
  -2  13   9    6.16    1.67
  -2  13   9    8.15    2.22
   1 -13  -9   27.66    3.15
  -1 -13   9   23.39    2.99
  -1 -13   9   22.99    2.35
   1 -13  -9   25.30    2.26
   1  13  -9   30.89    6.89
  -1  13   9   22.73    2.90
   1  13  -9   21.51    4.76
   0 -13   9   29.92    1.62
   0 -13  -9   31.35    3.57
   0 -13  -9   29.84    2.19
   0 -13   9   32.12    2.56
   0 -13   9   30.44    2.65
   0  13   9   28.50    3.01
   0  13  -9   36.03    6.78
  -1 -13  -9   17.04    3.06
   1 -13   9   14.35    1.63
   1 -13   9   14.48    2.12
   1 -13   9   14.65    1.99
   1  13   9   16.67    4.85
  -1  13  -9   22.74    6.10
   1  13   9   16.66    2.83
   2 -13   9    3.01    1.48
  -2 -13  -9    5.44    3.03
  -2 -13  -9    4.98    1.28
   2 -13   9    4.46    1.77
   2  13   9    3.64    3.03
  -2  13  -9    9.37    4.63
   2  13   9    6.32    2.67
   3 -13   9    1.22    1.94
  -3 -13  -9   -0.35    3.11
  -3  13  -9   15.74    6.19
   3  13   9    5.47    2.93
  -3 -14   9   11.61    3.02
   3 -14  -9    8.18    1.80
  -3  14   9   10.55    2.62
  -3  14   9   11.06    2.57
   2 -14  -9    0.70    1.42
  -2 -14   9    1.79    2.39
   2 -14  -9   -0.81    1.98
  -2 -14   9   -0.96    1.38
   2  14  -9   -1.32    3.65
   2  14  -9    3.47    3.25
  -2  14   9    1.45    2.02
  -1 -14   9    2.01    1.54
   1 -14  -9    2.61    2.25
  -1 -14   9    2.16    2.14
   1 -14  -9    1.65    1.36
  -1  14   9    1.75    2.13
   1  14  -9    5.39    4.40
   1  14  -9    6.21    4.51
   0 -14   9   72.08    2.49
   0 -14  -9   76.74    3.11
   0 -14  -9   72.07    4.04
   0 -14   9   70.94    3.16
   0 -14   9   73.59    3.45
   0  14   9   74.31    3.96
   0  14  -9   80.68    7.28
   1 -14   9    2.69    1.55
   1 -14   9    1.38    1.14
   1 -14   9   -0.12    1.64
  -1 -14  -9    1.23    1.23
  -1 -14  -9    1.61    2.59
   1  14   9    3.37    4.39
  -1  14  -9   -3.81    5.34
   1  14   9    2.22    2.29
  -2 -14  -9   33.64    4.64
  -2 -14  -9   37.28    2.25
   2 -14   9   31.91    2.90
   2 -14   9   35.80    2.62
  -2  14  -9   49.79    7.89
   2  14   9   35.50    6.43
   2  14   9   33.70    3.63
   3 -14   9   -1.10    1.87
   3 -14   9    2.10    1.93
  -3 -14  -9    3.72    3.46
   3  14   9    3.83    2.79
  -3 -15   9    9.22    3.02
   3 -15  -9    3.27    1.71
   3  15  -9   -3.78    4.08
  -3  15   9    7.11    2.49
  -2 -15   9   24.81    3.75
   2 -15  -9   20.97    3.13
   2 -15  -9   20.80    2.45
  -2 -15   9   18.84    2.24
   2  15  -9   19.36    4.21
   2  15  -9   16.08    4.87
  -2  15   9   22.88    3.09
  -1 -15   9    8.99    1.81
   1 -15  -9   10.45    2.60
   1 -15  -9   11.25    1.87
  -1 -15   9   13.56    2.60
   1  15  -9   10.02    4.63
   1  15  -9   14.60    4.83
  -1  15   9   14.06    2.75
   0 -15   9   14.51    2.01
   0 -15  -9   18.08    3.08
   0 -15   9   17.40    2.75
   0 -15  -9   15.00    2.14
   0 -15   9   14.88    1.46
   0  15   9   18.39    2.83
   1 -15   9    3.40    1.69
   1 -15   9    1.44    1.72
  -1 -15  -9    1.08    2.62
   1 -15   9    2.77    1.24
  -1 -15  -9    1.57    1.30
   1  15   9    2.88    2.45
  -1  15  -9    0.78    6.03
   1  15   9    8.91    4.43
   2 -15   9    5.03    1.66
  -2 -15  -9    4.16    3.35
   2 -15   9    2.25    1.97
  -2 -15  -9    5.20    1.46
   2  15   9    1.88    3.87
   2  15   9    6.79    2.63
  -2  15  -9   14.32    6.02
   3 -15   9    4.54    2.08
   3 -15   9   -1.22    2.03
  -3 -15  -9    4.86    3.74
   3  15   9    7.50    3.03
   3 -16  -9   -0.34    1.60
  -3 -16   9    3.29    2.93
  -3  16   9    0.73    2.25
   2 -16  -9   24.30    3.36
  -2 -16   9   35.23    4.00
   2 -16  -9   27.39    2.74
  -2 -16   9   23.64    2.57
   2  16  -9   23.43    4.65
   2  16  -9   21.45    5.34
  -2  16   9   27.39    3.32
   1 -16  -9   14.77    2.99
  -1 -16   9   13.31    2.64
   1 -16  -9   12.62    1.92
  -1 -16   9    8.25    1.95
  -1  16   9   15.63    2.74
   1  16  -9   11.22    4.68
   1  16  -9   10.68    4.47
   0 -16   9   12.47    2.04
   0 -16  -9   19.33    3.31
   0 -16   9   18.73    2.87
   0 -16  -9   15.83    2.28
   0  16   9   17.25    2.75
  -1 -16  -9   30.88    2.60
   1 -16   9   30.62    2.21
  -1 -16  -9   27.87    4.42
   1 -16   9   25.95    2.83
   1  16   9   30.42    3.42
  -1  16  -9   41.21    8.87
   2 -16   9   -0.37    1.93
  -2 -16  -9   -0.55    3.32
   2 -16   9    0.89    1.46
  -2 -16  -9    1.91    1.33
   2  16   9    2.15    2.48
   2  16   9    0.08    4.08
  -2  16  -9   10.76    6.26
   3 -16   9    4.83    2.16
  -3 -16  -9    6.20    3.94
   3 -16   9   -1.27    2.15
   3  16   9    7.74    3.14
  -3 -17   9    5.46    3.17
   3 -17  -9    0.58    1.79
  -2 -17   9    8.71    2.92
   2 -17  -9    4.55    1.86
   2 -17  -9    4.60    2.56
   2  17  -9    4.88    4.25
  -2  17   9    6.02    2.49
  -1 -17   9    9.81    2.64
   1 -17  -9    3.89    2.76
  -1 -17   9    3.12    1.82
   1 -17  -9    5.97    1.84
  -1  17   9    8.38    2.54
   1  17  -9    3.34    4.45
   1  17  -9   15.08    4.95
  -1 -17  -9   16.19    3.56
   1 -17   9   13.55    1.89
  -1 -17  -9   15.10    2.01
   1 -17   9   12.74    2.25
  -1  17  -9   26.48    8.47
   1  17   9   15.81    2.92
   2 -17   9   -3.93    1.84
   2 -17   9   -0.61    1.39
  -2 -17  -9    0.32    3.46
  -2 -17  -9   -0.23    1.33
   2  17   9   -5.16    4.65
   2  17   9    2.63    2.57
  -2  17  -9    9.23    6.52
  -2 -18   9    9.01    3.04
   2 -18  -9    1.34    1.73
   2  18  -9   -3.08    4.48
  -2  18   9    5.29    2.63
  -1 -18   9   16.45    2.96
  -1 -18   9    9.00    2.18
   1 -18  -9   10.30    3.03
   1 -18  -9    9.36    2.02
  -1  18   9   13.55    2.85
   1  18  -9    3.14    4.45
   0 -18   9   12.29    2.35
   0 -18  -9   14.17    3.33
   0 -18  -9   16.47    2.30
   0 -18   9   15.63    2.54
   0  18   9   19.45    3.20
   1 -18   9   -0.23    1.90
  -1 -18  -9    3.66    1.68
   1 -18   9    4.90    1.57
  -1 -18  -9    3.34    3.37
   1  18   9    5.93    2.56
  -1  18  -9    8.20    8.24
   2 -18   9    2.63    2.21
  -2 -18  -9    7.53    1.81
   2 -18   9    9.15    2.10
  -2 -18  -9   12.26    3.88
   2  18   9   -3.03    5.14
   2  18   9   12.27    2.98
  -2 -19   9    4.78    2.95
   2 -19  -9   -0.15    1.85
   2  19  -9   -5.62    4.76
  -2  19   9    3.30    2.53
  -1 -19   9    6.08    2.62
  -1 -19   9   -1.68    1.94
   1 -19  -9    0.27    1.69
   1 -19  -9    0.20    2.83
  -1  19   9    4.96    2.54
   0 -19   9    2.07    2.06
   0 -19   9   -3.71    1.87
   0 -19  -9   -1.23    3.05
   0 -19  -9    0.48    1.74
   0  19   9    1.46    2.43
  -1 -19  -9    2.27    1.66
   1 -19   9   -3.40    1.89
   1 -19   9    2.98    1.52
  -1 -19  -9   -2.38    3.44
   1  19   9    3.79    2.59
  -1  19  -9    5.76    9.10
  -2 -19  -9    2.25    3.86
   2  19   9    6.02    2.75
   1 -20  -9    3.02    1.95
   1 -20  -9    3.35    3.26
  -1 -20   9    1.17    2.25
  -1  20   9   12.07    3.03
   0 -20   9   -3.86    1.97
   0 -20  -9    1.92    1.92
   0 -20   9    3.80    2.26
   0 -20  -9   -0.44    3.25
   0  20   9    4.89    2.65
   1 -20   9   -3.43    2.12
  -1 -20  -9    3.67    3.83
  -1 -20  -9    1.37    1.85
  -1  20  -9   14.67    8.63
   1  20   9    9.54    2.89
   0 -21   9   -3.21    2.20
   0 -21  -9    0.39    1.92
   0 -21   9    7.33    2.51
   0 -21  -9    1.99    3.55
   0  21   9    6.36    2.97
   5   0 -10   -2.88    1.84
  -5   0  10   -3.42    4.52
   4   0 -10   27.02    3.14
  -4   0  10   27.75    5.53
  -4   0  10   26.09    2.61
  -3   0  10    0.67    1.53
   3   0 -10   -0.62    0.98
   3   0 -10    0.03    0.77
  -3   0  10    1.02    1.02
  -3   0  10    0.12    1.98
   2   0 -10   19.86    1.73
  -2   0  10   18.47    1.49
   2   0 -10   18.49    2.30
  -2   0  10   19.31    1.99
   1   0 -10    0.81    1.32
  -1   0  10   -0.36    0.81
  -1   0  10   -0.29    0.88
   1   0 -10   -0.21    0.49
  -1   0  10    0.77    1.23
   0   0  10  159.57    4.01
   0   0  10  154.32    3.62
   0   0  10  154.48    3.35
   0   0 -10  155.51    6.01
   1   0  10    0.11    1.04
   1   0  10    1.21    1.30
  -1   0 -10    1.12    1.86
   2   0  10   55.64    2.94
   2   0  10   56.21    2.37
   2   0  10   55.55    2.49
  -2   0 -10   52.09    3.89
  -2   0 -10   56.44    2.38
   3   0  10   -0.01    2.12
   3   0  10   -0.56    1.04
  -3   0 -10    0.39    2.48
   3   0  10    1.39    1.31
  -4   0 -10    4.20    3.49
   4   0  10   -2.09    2.45
   4   0  10   -1.71    1.45
   5  -1 -10   -0.23    1.87
  -5   1  10   -2.95    4.44
  -4  -1  10    6.62    1.93
  -4  -1  10    8.28    3.70
   4  -1 -10    4.58    1.65
   4   1 -10    4.69    1.78
  -4   1  10    8.56    1.93
  -4   1  10    7.09    3.65
  -3  -1  10   26.93    2.46
   3  -1 -10   28.04    1.58
   3  -1 -10   28.79    2.44
  -3   1  10   28.55    2.53
   3   1 -10   27.13    1.46
  -3   1  10   28.08    4.02
  -3   1  10   28.38    1.70
   3   1 -10   27.02    2.53
   2  -1 -10   22.54    1.78
  -2  -1  10   21.62    1.56
   2  -1 -10   22.25    2.31
  -2  -1  10   20.48    2.00
   2   1 -10   21.07    2.45
  -2   1  10   22.33    2.05
  -2   1  10   20.44    1.56
   2   1 -10   21.49    0.97
  -2   1  10   20.85    1.34
   2   1 -10   22.03    1.86
   1  -1 -10  119.96    3.18
   1  -1 -10  121.92    4.43
  -1  -1  10  118.79    2.57
  -1  -1  10  115.67    3.50
  -1  -1  10  115.69    2.81
  -1   1  10  115.97    2.93
  -1   1  10  116.56    2.84
   1   1 -10  120.46    3.26
  -1   1  10  115.19    3.44
   1   1 -10  117.41    4.66
   0  -1  10    7.90    1.26
   0  -1 -10   10.17    2.25
   0  -1  10    8.61    1.43
   0  -1  10    7.86    1.36
   0   1  10    6.47    1.09
   0   1 -10    9.80    2.51
   0   1  10    9.94    1.50
   0   1  10    8.81    1.60
   1  -1  10   31.11    1.88
   1  -1  10   31.01    1.90
  -1  -1 -10   27.68    1.82
   1  -1  10   30.63    1.82
   1  -1  10   30.74    1.29
  -1  -1 -10   29.36    2.70
   1   1  10   28.97    1.42
   1   1  10   29.60    2.12
  -1   1 -10   32.30    3.53
   1   1  10   29.65    1.79
  -2  -1 -10    9.79    2.07
   2  -1  10   10.58    1.46
   2  -1  10    8.98    1.38
  -2  -1 -10   11.39    1.69
   2  -1  10   13.93    2.04
   2   1  10   10.25    1.47
  -2   1 -10   11.68    1.52
   2   1  10    8.69    1.50
  -2   1 -10    9.12    2.50
   2   1  10   12.14    2.01
   3  -1  10   -0.22    1.03
   3  -1  10    1.10    1.96
   3  -1  10    2.56    1.39
  -3  -1 -10    0.87    2.10
   3   1  10   -0.95    1.09
  -3   1 -10    0.65    2.65
   3   1  10    0.68    1.26
   3   1  10    2.19    2.30
   4  -1  10    5.32    1.80
   4  -1  10    2.88    2.66
   4   1  10    3.50    1.92
   4   1  10    6.46    2.76
   5  -2 -10    3.45    2.14
  -5   2  10    5.37    5.36
   5   2 -10    1.07    2.29
   4  -2 -10    9.03    1.98
  -4  -2  10    9.67    2.12
  -4   2  10   13.36    3.90
  -4   2  10    9.58    1.99
   4   2 -10    7.94    2.14
   3  -2 -10   25.95    1.62
   3  -2 -10   26.72    2.39
  -3  -2  10   26.18    2.54
  -3   2  10   26.70    1.73
   3   2 -10   28.96    2.66
   3   2 -10   27.02    3.29
  -3   2  10   27.22    3.72
  -3   2  10   27.23    2.34
  -2  -2  10    9.26    1.30
  -2  -2  10   10.00    1.67
   2  -2 -10    9.01    1.37
   2   2 -10    9.63    1.69
  -2   2  10   10.62    1.80
  -2   2  10   10.26    2.21
   2   2 -10   10.01    1.99
  -2   2  10    9.98    1.26
   2   2 -10    9.59    0.69
  -2   2  10   10.21    1.30
  -1  -2  10    0.89    0.90
   1  -2 -10   -0.33    1.01
  -1  -2  10   -0.31    1.16
  -1  -2  10    0.05    0.60
  -1   2  10    0.65    1.02
  -1   2  10    0.08    0.95
  -1   2  10    0.76    1.28
   1   2 -10    0.04    0.74
   1   2 -10    0.54    1.53
   0  -2  10    4.69    1.10
   0  -2  10    2.67    1.22
   0  -2  10    2.39    1.07
   0  -2 -10    6.46    1.94
   0   2  10    3.40    1.40
   0   2  10    3.78    1.47
   0   2 -10    5.38    2.56
   0   2  10    2.73    1.03
  -1  -2 -10   35.55    2.07
   1  -2  10   38.80    1.98
  -1  -2 -10   37.30    2.66
   1  -2  10   39.72    2.03
   1  -2  10   39.89    1.95
   1   2  10   36.76    1.76
   1   2  10   37.81    1.91
  -1   2 -10   37.96    3.75
   1   2  10   35.52    2.31
   2  -2  10    1.23    1.22
   2  -2  10    1.44    1.52
  -2  -2 -10   -0.83    1.39
  -2  -2 -10   -0.61    1.49
   2  -2  10    0.35    0.67
   2   2  10    0.01    0.84
  -2   2 -10   -0.52    2.29
   2   2  10    1.14    1.20
  -2   2 -10    0.52    1.10
   2   2  10    0.23    1.68
  -3  -2 -10   14.58    2.66
   3  -2  10   11.11    2.22
   3  -2  10   10.32    2.02
   3  -2  10   12.07    1.69
  -3  -2 -10   12.44    2.02
  -3   2 -10   13.45    3.59
   3   2  10   17.50    2.79
   3   2  10   10.45    1.80
   3   2  10   14.10    1.94
   4  -2  10    2.33    1.52
   4  -2  10    1.28    2.57
  -4  -2 -10    9.14    3.43
  -4   2 -10    8.99    3.95
   4   2  10    2.34    2.79
   4   2  10   -0.88    1.76
  -5   3  10   -1.58    4.87
   4  -3 -10    0.92    1.32
  -4  -3  10    1.36    1.78
   4  -3 -10    1.01    1.15
   4   3 -10    3.89    2.64
   4   3 -10    0.49    1.69
  -4   3  10    2.06    3.23
   3  -3 -10   65.79    2.43
   3  -3 -10   65.53    3.48
  -3  -3  10   66.15    3.37
  -3   3  10   65.36    3.04
   3   3 -10   68.40    3.76
  -3   3  10   64.36    2.34
   3   3 -10   66.51    4.60
  -3   3  10   66.75    4.73
  -2  -3  10   20.79    2.17
  -2  -3  10   23.60    1.48
   2   3 -10   22.69    2.77
  -2   3  10   21.87    1.59
  -2   3  10   23.13    2.65
   2   3 -10   22.68    2.15
  -2   3  10   22.33    1.61
   2   3 -10   21.76    0.80
  -2   3  10   21.17    2.22
  -1  -3  10  248.60    4.64
  -1  -3  10  244.14    5.65
  -1  -3  10  259.17    4.25
   1  -3 -10  257.54    7.11
  -1   3  10  254.62    5.91
   1   3 -10  249.25    6.05
  -1   3  10  254.03    4.84
   1   3 -10  256.35    8.07
  -1   3  10  259.55    5.25
   0  -3  10    0.00    0.95
   0  -3  10    1.35    0.95
   0  -3  10    0.04    1.06
   0  -3 -10    2.86    1.74
   0   3  10    0.15    1.05
   0   3  10    0.59    1.35
   0   3 -10    3.68    2.76
   0   3  10    1.19    1.47
   1  -3  10   41.05    2.00
   1  -3  10   39.90    1.93
   1  -3  10   38.78    2.00
  -1  -3 -10   42.30    2.26
  -1  -3 -10   41.17    2.44
   1   3  10   40.56    2.11
   1   3  10   41.73    2.55
  -1   3 -10   42.42    4.57
   1   3  10   41.94    1.96
   2  -3  10   23.84    2.16
  -2  -3 -10   22.71    2.49
  -2  -3 -10   24.40    2.26
   2  -3  10   25.28    1.75
   2  -3  10   26.67    2.15
   2   3  10   24.09    2.19
  -2   3 -10   21.90    4.05
   2   3  10   25.00    1.93
  -2   3 -10   25.30    1.70
   2   3  10   28.07    2.55
   3  -3  10   40.41    3.07
  -3  -3 -10   42.08    3.74
  -3  -3 -10   38.99    2.94
   3  -3  10   39.60    2.72
   3  -3  10   42.15    2.47
  -3   3 -10   42.85    5.40
   3   3  10   36.03    3.13
   3   3  10   41.21    3.53
   3   3  10   41.05    2.17
  -4  -3 -10   12.47    3.27
   4  -3  10    4.21    2.60
   4  -3  10    5.87    1.84
   4   3  10    2.19    2.09
   4   3  10    3.19    2.89
  -4  -4  10   58.04    3.58
   4  -4 -10   53.25    3.79
   4  -4 -10   55.66    2.70
  -4   4  10   57.06    6.37
   4   4 -10   52.21    4.20
   4   4 -10   70.83    6.34
   3  -4 -10   -0.04    0.92
  -3  -4  10   -0.42    1.72
   3  -4 -10    0.05    0.89
   3   4 -10   -0.55    1.41
  -3   4  10    0.97    1.11
  -3   4  10    0.16    1.75
   3   4 -10    0.84    1.98
  -3   4  10    0.62    1.63
  -2  -4  10    5.42    1.03
  -2  -4  10    4.36    1.53
  -2   4  10    5.02    1.27
  -2   4  10    4.19    1.18
  -2   4  10    6.39    1.72
   2   4 -10    5.20    1.34
  -2   4  10    5.53    1.62
   2   4 -10    4.56    1.87
  -1  -4  10    4.02    1.38
   1  -4 -10    3.73    1.09
  -1  -4  10    3.95    1.02
   1   4 -10    5.22    2.15
  -1   4  10    3.86    1.12
  -1   4  10    3.51    1.32
  -1   4  10    2.98    1.42
   1   4 -10    3.70    1.21
   0  -4  10   83.58    2.19
   0  -4 -10   88.67    3.73
   0  -4  10   88.57    2.85
   0  -4 -10   83.31    3.02
   0  -4  10   89.49    2.58
   0   4  10   84.76    2.63
   0   4 -10   83.05    5.71
   0   4  10   83.83    3.05
   1  -4  10   22.25    1.67
   1  -4  10   22.15    1.88
  -1  -4 -10   22.66    1.82
   1  -4  10   22.26    1.62
  -1  -4 -10   21.75    2.06
   1   4  10   23.38    1.74
  -1   4 -10   23.01    4.35
   1   4  10   23.40    2.11
   1   4  10   23.51    2.18
   2  -4  10  150.39    3.82
   2  -4  10  151.42    4.32
  -2  -4 -10  150.72    5.17
  -2  -4 -10  148.99    4.50
  -2   4 -10  147.89    3.53
   2   4  10  145.94    4.71
   2   4  10  141.29    4.49
   2   4  10  150.41    3.61
  -2   4 -10  154.06    6.98
   3  -4  10    3.53    1.23
   3  -4  10    5.42    1.99
  -3  -4 -10    5.07    1.89
  -3  -4 -10    3.46    2.03
   3  -4  10    5.65    1.63
   3   4  10    5.03    1.39
   3   4  10    2.12    1.59
   3   4  10    6.09    2.73
  -3   4 -10    5.14    3.32
   4  -4  10    1.69    1.53
   4  -4  10   -3.40    2.30
  -4  -4 -10    3.28    2.39
  -4   4 -10    9.65    4.46
   4   4  10   -1.09    2.73
   4  -5 -10   -0.57    1.14
  -4  -5  10    1.64    2.03
   4  -5 -10    0.47    1.27
   4   5 -10    1.52    2.87
   4   5 -10   -1.65    1.78
  -4   5  10    0.16    3.01
   3  -5 -10    6.50    1.28
  -3  -5  10    5.98    2.11
   3   5 -10    4.07    2.32
  -3   5  10    4.68    1.83
   3   5 -10    4.26    1.73
  -3   5  10    5.78    2.12
  -2  -5  10   53.62    1.93
  -2  -5  10   54.06    2.95
  -2   5  10   55.10    3.29
   2   5 -10   55.19    3.14
  -2   5  10   55.16    2.26
  -2   5  10   56.19    3.01
  -2   5  10   55.21    2.40
   2   5 -10   54.67    4.00
  -1  -5  10    1.67    1.33
   1  -5 -10    2.56    0.96
  -1  -5  10    2.75    1.01
   1   5 -10    4.31    2.21
   1   5 -10    3.24    1.37
  -1   5  10    2.81    1.12
  -1   5  10    1.98    1.38
  -1   5  10    3.21    1.39
   0  -5  10   67.17    2.37
   0  -5  10   68.08    2.53
   0  -5 -10   64.06    2.74
   0  -5  10   68.07    1.92
   0  -5 -10   66.96    3.05
   0   5  10   64.54    2.36
   0   5  10   62.74    2.81
   0   5 -10   61.89    5.41
  -1  -5 -10    3.09    0.86
   1  -5  10    2.87    1.25
   1  -5  10    3.24    1.14
  -1  -5 -10    3.85    1.55
   1  -5  10    2.76    1.10
   1   5  10    3.87    1.38
   1   5  10    3.23    1.16
   1   5  10    5.04    1.96
  -1   5 -10    5.06    2.86
   2  -5  10    0.15    1.34
  -2  -5 -10    0.72    1.12
  -2  -5 -10    1.05    1.85
   2  -5  10   -0.69    1.32
   2   5  10    0.09    1.14
   2   5  10    0.80    1.33
   2   5  10    1.14    2.24
  -2   5 -10    0.90    0.95
  -2   5 -10   -0.85    2.74
   3  -5  10    3.58    1.19
   3  -5  10    3.81    1.60
   3  -5  10    2.39    1.93
  -3  -5 -10    4.28    1.80
  -3  -5 -10    2.28    2.00
  -3   5 -10    5.76    3.38
   3   5  10    2.61    1.67
   3   5  10    3.86    2.69
   4  -5  10    7.31    2.68
   4  -5  10    8.33    1.96
   4   5  10    3.18    2.36
   4   5  10    5.36    3.06
  -4  -6  10    4.02    2.28
   4  -6 -10    0.95    1.31
   4  -6 -10    2.71    1.32
   4   6 -10    2.40    3.02
   4   6 -10   -1.45    2.01
  -4   6  10    0.98    3.19
   3  -6 -10   26.76    1.71
   3  -6 -10   26.48    1.86
  -3  -6  10   27.09    3.02
  -3   6  10   26.11    3.49
  -3   6  10   24.10    2.54
   3   6 -10   27.34    3.25
   3   6 -10   25.05    3.94
  -2  -6  10    0.48    1.64
  -2  -6  10    2.23    1.05
  -2   6  10    1.38    1.37
  -2   6  10    1.03    1.16
  -2   6  10    2.10    1.73
  -2   6  10    0.35    1.26
   2   6 -10    1.25    1.87
   2   6 -10    2.28    1.54
  -1  -6  10    0.01    0.98
  -1  -6  10   -0.12    1.31
  -1   6  10   -0.33    1.31
   1   6 -10    0.96    2.12
  -1   6  10   -0.62    1.08
   1   6 -10    2.60    1.65
   0  -6  10    6.80    1.36
   0  -6 -10    7.85    1.62
   0  -6  10    6.08    0.94
   0  -6 -10   10.38    1.82
   0  -6  10    7.84    1.32
   0   6  10    8.33    1.35
   0   6  10    8.15    1.86
   0   6 -10    9.86    3.24
  -1  -6 -10  103.07    3.69
   1  -6  10  107.06    2.99
  -1  -6 -10  104.81    2.91
   1  -6  10  105.84    3.08
   1  -6  10  108.35    3.01
   1   6  10  100.78    3.89
   1   6  10  102.79    3.03
  -1   6 -10  106.85    6.63
   1   6  10  100.65    4.16
   2  -6  10    1.63    1.43
  -2  -6 -10    0.46    1.01
   2  -6  10    0.45    1.33
  -2  -6 -10    1.95    2.01
   2   6  10    1.42    1.51
   2   6  10   -0.36    1.17
  -2   6 -10   -0.99    2.92
   2   6  10    4.34    2.43
   3  -6  10   24.77    2.67
  -3  -6 -10   27.55    2.95
  -3  -6 -10   25.64    3.15
   3  -6  10   27.42    2.46
  -3   6 -10   33.21    5.81
   3   6  10   23.55    3.10
   3   6  10   29.95    3.61
   4  -6  10    6.01    2.61
   4  -6  10    9.04    1.97
   4   6  10    3.01    2.39
   4   6  10    6.53    3.18
  -4  -7  10    4.29    2.33
   4  -7 -10    1.77    1.36
   4  -7 -10    1.19    1.29
  -4   7  10    2.55    3.21
   4   7 -10    0.52    3.12
   4   7 -10   -1.15    2.16
   3  -7 -10   77.63    2.63
  -3  -7  10   76.20    3.97
   3  -7 -10   70.62    2.96
   3   7 -10   75.09    4.59
  -3   7  10   73.35    3.53
   3   7 -10   79.34    5.53
  -3   7  10   77.02    4.71
  -2  -7  10   66.00    2.28
  -2  -7  10   63.48    3.35
  -2   7  10   66.53    2.63
  -2   7  10   67.13    3.00
   2   7 -10   69.89    3.92
   2   7 -10   68.21    4.75
  -2   7  10   63.88    3.45
  -2   7  10   65.92    3.34
  -1  -7  10   93.66    2.75
  -1  -7  10   88.96    3.35
   1  -7 -10   92.09    3.42
  -1   7  10   92.61    3.39
   1   7 -10   90.56    5.53
  -1   7  10   91.65    3.25
   1   7 -10   92.87    4.64
  -1   7  10   93.38    2.97
   0  -7  10   25.25    2.04
   0  -7  10   24.39    1.91
   0  -7 -10   24.45    2.30
   0  -7  10   23.45    1.25
   0   7 -10   30.95    5.52
   0   7  10   21.96    2.31
   1  -7  10    5.31    1.27
   1  -7  10    4.55    1.10
   1  -7  10    4.55    1.40
  -1  -7 -10    6.87    1.88
   1   7  10    6.69    2.09
  -1   7 -10    5.15    3.49
   1   7  10    4.81    1.33
   1   7  10    4.86    2.00
   2  -7  10   23.05    2.23
   2  -7  10   21.37    2.04
  -2  -7 -10   21.18    1.89
  -2  -7 -10   26.22    3.30
   2   7  10   24.09    3.45
   2   7  10   24.80    3.24
   2   7  10   20.82    1.94
  -2   7 -10   23.58    4.15
   3  -7  10   27.91    2.56
   3  -7  10   29.30    2.77
  -3  -7 -10   29.36    3.19
  -3   7 -10   38.18    6.28
   3   7  10   28.14    3.67
   3   7  10   26.10    3.41
   4  -7  10   26.09    3.16
   4  -7  10   22.90    3.43
   4   7  10   19.53    3.71
   4  -8 -10   82.47    3.56
  -4  -8  10   93.66    4.88
   4   8 -10   91.63    7.36
  -4   8  10   84.43    6.60
   4   8 -10   75.38    5.48
  -3  -8  10    2.67    2.12
   3  -8 -10    2.37    1.10
   3   8 -10    3.39    2.66
   3   8 -10    2.85    2.18
  -3   8  10    3.13    1.86
   2  -8 -10   36.23    2.73
  -2  -8  10   34.84    2.99
  -2  -8  10   36.76    1.93
  -2   8  10   35.20    2.72
  -2   8  10   36.51    2.27
   2   8 -10   37.03    3.88
  -2   8  10   35.76    2.47
   2   8 -10   37.73    4.42
   1  -8 -10    0.23    1.49
  -1  -8  10    0.60    1.23
  -1  -8  10   -1.09    1.50
  -1   8  10   -0.02    1.28
   1   8 -10    2.05    2.65
  -1   8  10    0.01    1.58
   1   8 -10    3.51    2.33
  -1   8  10   -0.20    0.87
   0  -8  10   91.47    2.33
   0  -8  10   90.17    3.13
   0  -8  10   93.33    2.95
   0  -8 -10   89.42    3.62
   0   8  10   82.00    3.28
   0   8  10   89.29    2.96
   0   8 -10   88.11    6.70
   1  -8  10    6.31    1.33
   1  -8  10    7.48    1.57
   1  -8  10    5.55    1.18
  -1  -8 -10    6.33    2.04
  -1   8 -10    7.25    3.81
   1   8  10    4.63    2.08
   1   8  10    5.58    1.41
   1   8  10    8.14    2.45
   2  -8  10  164.81    4.63
  -2  -8 -10  168.97    5.51
   2  -8  10  165.30    4.31
  -2   8 -10  177.09    8.30
   2   8  10  157.32    5.91
   2   8  10  152.44    5.18
   2   8  10  164.63    4.00
   3  -8  10    0.38    1.55
   3  -8  10   -0.95    1.70
  -3  -8 -10    0.89    2.45
   3   8  10   -0.57    2.06
  -3   8 -10    4.82    4.07
   3   8  10    2.78    2.82
   4  -8  10    5.03    2.48
   4  -8  10    9.31    1.97
   4   8  10    3.16    3.35
   4  -9 -10    4.19    1.63
  -4  -9  10    8.80    2.74
  -4   9  10    4.71    3.48
   4   9 -10    0.66    3.19
   4   9 -10   -1.86    2.57
  -3  -9  10    1.68    2.23
   3  -9 -10    0.33    1.04
   3  -9 -10    2.79    1.63
   3   9 -10    0.56    2.73
   3   9 -10    2.05    2.27
  -3   9  10    1.43    1.73
   2  -9 -10    7.55    1.98
  -2  -9  10    8.89    2.33
  -2  -9  10    7.79    1.36
  -2   9  10    6.86    1.62
  -2   9  10    7.36    1.61
  -2   9  10    7.50    1.94
   2   9 -10    7.86    3.08
   2   9 -10    8.77    2.44
  -1  -9  10    0.24    1.64
   1  -9 -10    1.93    1.68
  -1  -9  10    0.94    1.23
   1   9 -10    3.09    2.74
  -1   9  10    1.67    1.76
   1   9 -10    3.82    3.25
  -1   9  10    0.05    0.87
  -1   9  10    0.43    1.37
   0  -9  10   37.76    2.36
   0  -9  10   38.89    1.51
   0  -9 -10   37.67    2.63
   0  -9  10   41.63    2.34
   0   9  10   35.79    2.60
   0   9  10   37.81    2.38
   0   9 -10   45.48    6.62
   1  -9  10    8.99    1.31
  -1  -9 -10    8.08    2.00
   1  -9  10   10.80    1.54
   1  -9  10    7.98    1.60
  -1   9 -10    9.32    4.21
   1   9  10   10.49    2.92
   1   9  10   11.33    2.52
   1   9  10    8.34    1.56
   2  -9  10    0.32    1.59
  -2  -9 -10   -0.33    2.36
   2  -9  10    0.27    1.30
   2   9  10   -0.25    1.29
   2   9  10    2.52    2.60
   2   9  10    3.09    2.29
  -2   9 -10   -1.81    3.32
   3  -9  10    0.03    1.67
   3  -9  10   -0.62    1.67
  -3  -9 -10    1.45    2.64
   3   9  10    2.47    2.76
   3   9  10   -3.11    2.24
  -3   9 -10    5.56    4.49
   4   9  10    0.09    3.34
  -4 -10  10    4.13    2.74
   4 -10 -10    0.54    1.41
   4  10 -10   -1.21    3.32
  -4  10  10    3.38    3.33
   3 -10 -10    0.25    1.10
  -3 -10  10   -0.62    2.24
   3 -10 -10    1.56    1.68
   3  10 -10   -0.31    2.47
   3  10 -10   -1.89    2.78
  -3  10  10    0.72    1.74
   2 -10 -10    1.06    1.15
  -2 -10  10    0.31    2.10
  -2 -10  10    1.33    1.28
   2 -10 -10    0.92    1.77
   2  10 -10    5.27    2.71
   2  10 -10    4.10    3.18
  -2  10  10    0.82    1.30
  -2  10  10   -0.18    1.72
  -1 -10  10   13.34    2.21
  -1 -10  10   12.55    1.65
   1 -10 -10   13.88    2.25
  -1  10  10   12.17    2.16
  -1  10  10   12.14    1.75
  -1  10  10   10.73    1.47
   1  10 -10   12.31    3.43
   1  10 -10   14.01    4.09
   0 -10 -10    2.50    1.79
   0 -10  10    1.92    0.77
   0 -10  10    1.46    1.29
   0 -10  10    0.71    1.50
   0  10 -10    7.74    3.93
   0  10  10    2.06    1.85
   0  10  10    1.22    1.44
   1 -10  10   22.33    1.58
   1 -10  10   24.07    1.94
   1 -10  10   22.43    2.07
  -1 -10 -10   23.94    3.13
   1  10  10   22.06    2.29
   1  10  10   27.01    5.36
  -1  10 -10   29.05    5.05
   1  10  10   22.27    3.11
   2 -10  10    2.14    1.69
  -2 -10 -10    2.71    2.52
   2 -10  10    4.25    1.47
   2  10  10    4.68    2.58
   2  10  10    3.62    1.40
  -2  10 -10    2.49    3.58
   2  10  10    5.31    2.70
   3 -10  10    5.19    2.02
   3 -10  10    3.03    1.83
  -3 -10 -10    4.30    2.81
  -3  10 -10    9.08    4.98
   3  10  10   -0.83    2.48
   3  10  10    4.25    2.90
   4 -10  10    1.34    2.32
  -4 -10 -10    5.74    3.17
   4  10  10   -4.32    3.39
  -4 -11  10    7.52    2.91
   4 -11 -10    2.75    1.64
  -4  11  10    6.63    3.74
   4  11 -10   -0.46    3.48
  -3 -11  10   28.81    3.70
   3 -11 -10   26.22    2.12
  -3  11  10   26.60    3.46
  -3  11  10   27.88    2.90
   3  11 -10   28.41    4.74
   3  11 -10   20.72    3.45
   2 -11 -10   60.04    2.74
   2 -11 -10   58.94    3.30
  -2 -11  10   58.70    2.49
  -2 -11  10   57.72    3.69
  -2  11  10   59.01    3.32
   2  11 -10   55.97    6.28
  -2  11  10   57.01    3.36
   2  11 -10   58.33    5.28
   1 -11 -10   19.74    2.78
  -1 -11  10   18.55    2.04
  -1 -11  10   15.52    2.62
  -1  11  10   19.93    2.73
   1  11 -10   21.82    4.19
   1  11 -10   28.33    6.42
  -1  11  10   20.65    2.38
   0 -11  10   67.58    3.10
   0 -11  10   67.98    2.14
   0 -11 -10   72.24    3.79
   0 -11  10   70.44    2.92
   0  11  10   70.06    3.03
   0  11 -10   67.20    7.38
   0  11  10   66.73    3.58
   1 -11  10    0.27    1.55
   1 -11  10   -0.30    0.97
  -1 -11 -10    1.16    2.32
   1 -11  10   -1.12    1.36
   1  11  10   -0.53    1.48
   1  11  10    2.66    3.78
   1  11  10    1.22    2.39
  -1  11 -10    2.78    4.81
   2 -11  10   -0.35    1.25
   2 -11  10   -0.42    1.57
  -2 -11 -10    0.12    2.51
   2  11  10    0.57    1.36
  -2  11 -10    1.30    3.77
   2  11  10    1.76    2.68
   2  11  10    2.88    2.64
  -3 -11 -10   22.25    3.56
   3 -11  10   16.64    2.54
   3 -11  10   18.09    2.30
   3  11  10   19.17    3.33
   4 -11  10   13.05    3.06
  -4 -11 -10   17.04    3.65
   4  11  10    6.05    3.74
   4 -12 -10   18.37    2.58
  -4  12  10   27.81    5.18
   4  12 -10   15.70    4.73
  -3 -12  10    2.18    2.41
   3 -12 -10   -0.35    1.32
  -3  12  10    1.33    1.83
   3  12 -10   -2.77    2.72
   3  12 -10   -3.53    3.33
  -3  12  10    1.68    2.04
  -2 -12  10    1.13    1.33
   2 -12 -10    1.91    1.29
   2 -12 -10    0.97    1.93
  -2 -12  10    1.95    2.20
   2  12 -10    2.83    2.93
  -2  12  10    1.09    1.30
   2  12 -10    2.82    3.53
  -2  12  10    1.36    1.93
  -1 -12  10   -0.64    1.43
  -1 -12  10   -0.53    1.86
   1 -12 -10   -0.78    2.02
  -1  12  10   -0.14    1.99
   1  12 -10    4.56    4.31
   1  12 -10    1.60    4.01
   0 -12  10   52.05    3.11
   0 -12 -10   52.42    3.81
   0 -12  10   53.46    1.97
   0 -12  10   56.47    2.86
   0  12 -10   59.44    7.45
   0  12  10   53.93    2.95
   0  12  10   48.96    3.20
   1 -12  10    0.49    1.03
   1 -12  10    1.58    1.51
   1 -12  10    0.13    1.56
  -1 -12 -10    3.16    2.33
   1  12  10    0.96    2.17
   1  12  10    5.88    4.35
  -1  12 -10    3.96    5.40
   1  12  10    1.69    1.52
   2 -12  10   27.49    2.37
   2 -12  10   26.73    2.60
  -2 -12 -10   28.73    4.15
   2  12  10   28.91    2.33
  -2  12 -10   40.01    7.21
   2  12  10   29.65    5.40
   2  12  10   28.60    3.56
   3 -12  10   -0.33    1.74
   3 -12  10   -1.92    1.76
  -3 -12 -10   -2.40    2.95
  -3  12 -10   13.67    5.94
   3  12  10    1.83    2.79
   4 -13 -10    1.40    1.70
  -4 -13  10   10.11    3.31
   4  13 -10   -5.09    4.06
  -4  13  10    1.63    3.74
  -3 -13  10    2.58    2.62
   3 -13 -10    0.35    1.39
  -3  13  10    2.97    2.20
  -3  13  10    1.81    1.81
   3  13 -10   -4.47    2.90
   3  13 -10   -1.53    3.62
  -2 -13  10   10.11    2.59
  -2 -13  10    7.38    1.61
   2 -13 -10    8.35    1.66
   2 -13 -10    6.91    2.21
   2  13 -10    7.43    3.35
  -2  13  10    8.43    2.24
   2  13 -10    5.90    3.82
   1 -13 -10   11.63    2.52
   1 -13 -10    9.51    1.61
  -1 -13  10   11.38    1.80
  -1 -13  10   12.14    2.47
   1  13 -10   13.05    4.53
  -1  13  10   14.32    2.64
   1  13 -10   11.46    4.65
   0 -13 -10   20.78    3.01
   0 -13  10   14.72    1.37
   0 -13  10   15.20    2.40
   0 -13  10   17.23    2.36
   0  13 -10   16.65    4.65
   0  13  10   19.63    2.80
   0  13  10   17.47    2.51
   1 -13  10    0.87    1.45
  -1 -13 -10    0.58    2.55
   1 -13  10   -0.52    1.55
   1 -13  10    0.72    1.07
   1  13  10    4.28    4.35
   1  13  10    1.58    1.55
  -1  13 -10   -6.14    5.35
   1  13  10    1.71    2.39
   2 -13  10   -0.07    1.66
   2 -13  10    0.23    1.34
  -2 -13 -10   -0.42    2.76
  -2  13 -10    2.76    4.93
   2  13  10    1.18    2.47
   2  13  10    2.75    3.07
   3 -13  10   -0.39    1.85
  -3 -13 -10   -0.56    3.34
  -3  13 -10   13.00    6.48
   3  13  10    4.03    2.88
  -3 -14  10    2.24    2.65
   3 -14 -10   -0.57    1.48
  -3  14  10   -0.31    2.06
   2 -14 -10    1.43    2.13
  -2 -14  10   -0.30    1.48
   2 -14 -10    0.49    1.39
  -2 -14  10    1.80    2.43
   2  14 -10   -2.38    4.01
   2  14 -10    2.22    3.42
  -2  14  10   -0.28    1.97
   1 -14 -10   21.81    3.25
  -1 -14  10   22.81    2.31
  -1 -14  10   25.74    3.06
   1 -14 -10   23.66    2.32
  -1  14  10   22.81    3.03
   1  14 -10   25.35    5.33
   1  14 -10   21.71    5.00
   0 -14 -10   22.37    3.59
   0 -14  10   25.86    2.54
   0 -14  10   26.07    2.80
   0 -14 -10   24.44    2.26
   0  14  10   22.67    3.10
  -1 -14 -10   18.61    2.99
   1 -14  10   19.32    1.80
   1 -14  10   23.28    2.38
   1 -14  10   18.29    2.52
   1  14  10   25.55    4.87
   1  14  10   20.49    3.17
  -1  14 -10   30.09    6.72
   2 -14  10   11.38    2.02
   2 -14  10    7.76    2.06
  -2 -14 -10    9.76    3.40
  -2 -14 -10   11.72    1.62
   2  14  10   15.79    3.00
   2  14  10    8.87    3.73
  -2  14 -10   22.09    6.44
  -3 -14 -10    1.60    3.31
   3 -14  10    2.83    1.92
   3 -14  10   -1.49    1.96
   3  14  10    3.50    2.91
   3 -15 -10   17.40    2.31
  -3 -15  10   25.18    4.23
  -3  15  10   18.07    3.08
   2 -15 -10   17.13    2.40
  -2 -15  10   17.92    2.07
   2 -15 -10   20.36    2.92
  -2 -15  10   22.21    3.23
   2  15 -10   15.44    4.93
  -2  15  10   19.90    2.96
   2  15 -10   12.92    3.94
  -1 -15  10   37.21    3.39
   1 -15 -10   37.10    2.68
  -1 -15  10   33.64    2.60
   1 -15 -10   35.23    3.60
   1  15 -10   45.95    8.02
  -1  15  10   33.43    3.39
   1  15 -10   31.26    7.02
   0 -15  10   15.10    2.51
   0 -15  10   12.22    1.99
   0 -15 -10   16.48    2.21
   0 -15 -10   19.51    3.29
   0  15  10   18.96    2.96
   1 -15  10    5.15    1.40
  -1 -15 -10    4.99    3.01
   1 -15  10    3.38    1.82
  -1 -15 -10    4.31    1.51
  -1  15 -10    1.58    6.37
   1  15  10    4.58    2.48
  -2 -15 -10    4.82    1.41
  -2 -15 -10    6.53    3.45
   2 -15  10    1.45    1.90
   2 -15  10    3.89    1.70
   2  15  10    5.68    2.62
  -2  15 -10   15.24    6.54
   2  15  10    1.98    3.78
   3 -15  10    3.00    2.29
  -3 -15 -10    9.49    3.95
   3 -15  10    6.89    2.27
   3  15  10   11.61    3.23
   3 -16 -10    1.63    1.77
  -3 -16  10    6.03    3.01
  -3  16  10    3.70    2.56
  -2 -16  10    0.51    1.63
   2 -16 -10    2.13    1.67
   2 -16 -10   -0.44    2.37
  -2 -16  10    6.18    2.78
   2  16 -10   -7.09    4.38
  -2  16  10    5.04    2.47
   2  16 -10    1.26    4.06
   1 -16 -10    1.19    1.49
   1 -16 -10    0.04    2.53
  -1 -16  10    0.38    1.65
  -1 -16  10    2.72    2.19
  -1  16  10    1.67    2.07
   1  16 -10    0.46    4.21
   1  16 -10    9.49    4.53
   0 -16 -10    3.29    2.87
  -1 -16 -10    0.63    1.36
  -1 -16 -10    0.24    3.06
   1 -16  10   -2.16    1.74
   1 -16  10   -1.09    1.13
   1  16  10    1.65    2.30
  -1  16 -10   -8.34    7.03
  -2 -16 -10   -3.69    3.42
  -2 -16 -10    0.41    1.31
   2 -16  10    0.12    1.44
   2 -16  10   -2.82    1.86
  -2  16 -10   14.18    6.85
   2  16  10   -6.96    4.26
   2  16  10    3.55    2.63
  -3 -16 -10   -1.76    3.76
   3  16  10    4.83    3.01
   3 -17 -10   -2.27    1.73
  -3 -17  10    7.75    3.33
  -3  17  10    1.80    2.42
   2 -17 -10   16.68    3.12
  -2 -17  10   25.01    3.99
   2 -17 -10   20.75    2.52
   2  17 -10   11.15    4.74
  -2  17  10   19.28    2.98
   1 -17 -10    1.11    1.61
   1 -17 -10   -1.07    2.58
  -1 -17  10   -1.73    1.68
  -1 -17  10    2.43    2.33
   1  17 -10   -2.97    4.42
  -1  17  10    0.83    2.29
   0 -17 -10   28.78    2.67
   0 -17  10   20.45    2.80
   0 -17  10   30.22    2.99
   0 -17 -10   29.52    3.95
   0  17  10   28.65    3.42
  -1 -17 -10    3.44    1.59
   1 -17  10    0.19    1.96
   1 -17  10    2.51    1.40
  -1 -17 -10    5.32    3.46
  -1  17 -10    0.92    8.60
   1  17  10    5.95    2.57
  -2 -17 -10   -4.52    3.50
  -2 -17 -10   -0.09    1.38
   2 -17  10   -0.12    1.52
  -2  17 -10   16.01    7.04
   2  17  10    3.90    2.60
   2 -18 -10   -0.52    1.76
  -2 -18  10    4.02    2.83
   2  18 -10   -3.99    4.54
  -2  18  10    2.99    2.53
   1 -18 -10    2.37    2.89
  -1 -18  10    6.19    2.52
   1 -18 -10    4.36    1.85
  -1 -18  10   -0.72    1.81
  -1  18  10    7.20    2.57
   1  18 -10   -3.36    4.36
   0 -18 -10    7.87    1.95
   0 -18 -10    5.49    3.21
   0 -18  10    3.15    2.11
   0 -18  10    9.38    2.41
   0  18  10   11.17    2.96
   1 -18  10   29.12    3.21
  -1 -18 -10   36.63    5.35
   1 -18  10   38.15    2.56
  -1 -18 -10   39.73    2.86
   1  18  10   42.54    3.82
   2 -18  10    2.37    2.22
  -2 -18 -10    2.97    3.93
   2 -18  10    5.10    1.87
  -2 -18 -10    4.88    1.76
   2  18  10   -4.75    5.23
   2  18  10   10.15    3.07
   2 -19 -10    2.53    1.96
  -2 -19  10    5.85    3.05
  -2  19  10    7.45    2.77
   2  19 -10   -2.50    5.19
   1 -19 -10   33.10    4.08
  -1 -19  10   35.81    3.88
   1 -19 -10   31.26    3.12
  -1 -19  10   20.83    2.84
  -1  19  10   29.08    3.63
   1 -19  10    1.56    2.19
  -1 -19 -10    8.86    2.03
  -1 -19 -10    8.58    3.86
  -1  19 -10   14.92    9.28
   1  19  10   10.35    2.92
  -1 -20  10   -4.39    1.91
   1 -20 -10   -1.37    1.84
   1 -20 -10   -2.59    3.17
  -1 -20  10    5.74    2.78
  -1  20  10    3.59    2.71
   0 -20 -10   -2.24    3.24
   0 -20  10    3.49    2.33
   0 -20 -10   -0.54    1.89
   0  20  10    3.30    2.74
   0  20 -10    1.24   12.38
  -1 -20 -10   -2.62    3.70
  -1 -20 -10   -1.85    1.64
   1  20  10    2.96    2.77
  -1  20 -10    9.91    9.90
   5   0 -11   43.00    4.44
  -4   0  11   -0.01    1.68
   4   0 -11   -0.56    1.35
  -4   0  11   -1.38    3.27
   3   0 -11  243.09    5.08
   3   0 -11  249.10    7.40
  -3   0  11  242.56    6.27
  -3   0  11  250.30    4.74
   2   0 -11   -0.40    1.31
   2   0 -11    0.17    0.74
  -2   0  11   -0.63    1.41
  -2   0  11   -0.17    0.98
  -2   0  11   -0.02    0.75
   1   0 -11    5.13    0.97
   1   0 -11    6.24    1.75
  -1   0  11    6.45    1.56
  -1   0  11    7.05    1.10
  -1   0  11    4.62    1.09
   0   0 -11    4.38    2.27
   0   0  11   -0.92    1.10
   0   0  11    0.35    0.96
   0   0  11    0.84    1.20
   1   0  11   91.60    2.73
  -1   0 -11   85.00    4.47
   1   0  11   90.15    3.02
   1   0  11   91.73    3.20
   1   0  11   91.02    2.44
   2   0  11    1.61    1.30
   2   0  11    0.00    0.72
   2   0  11    0.89    1.85
  -2   0 -11   -0.11    1.35
  -2   0 -11   -1.60    1.96
   3   0  11   33.11    3.32
   3   0  11   37.91    2.35
  -3   0 -11   42.17    4.70
   3   0  11   33.96    2.69
  -4   0 -11    4.95    3.59
   4   0  11   -2.42    2.54
   4   0  11   -2.59    1.45
   4  -1 -11   -0.45    1.28
  -4  -1  11    0.72    1.74
  -4   1  11   -0.31    3.41
  -4   1  11    0.23    1.66
   4   1 -11   -1.38    1.41
  -3  -1  11   43.88    2.89
   3  -1 -11   45.24    2.92
   3  -1 -11   44.93    1.87
   3   1 -11   44.48    3.92
  -3   1  11   44.80    4.45
   3   1 -11   44.17    3.10
  -3   1  11   41.59    2.91
  -3   1  11   44.47    2.07
  -2  -1  11   56.81    2.19
   2  -1 -11   55.73    3.38
   2  -1 -11   58.44    2.64
  -2  -1  11   57.00    2.83
   2   1 -11   56.91    3.60
  -2   1  11   57.34    2.83
  -2   1  11   57.26    2.21
   2   1 -11   60.02    2.75
   2   1 -11   57.41    1.58
  -2   1  11   55.16    1.96
  -1  -1  11  242.32    4.66
  -1  -1  11  242.46    5.74
   1  -1 -11  249.28    5.61
  -1  -1  11  245.15    4.61
   1  -1 -11  253.63    7.37
   1   1 -11  250.21    5.69
  -1   1  11  238.37    4.88
  -1   1  11  244.89    5.78
   1   1 -11  247.53    7.69
  -1   1  11  239.12    4.71
   0  -1 -11  103.39    4.85
   0  -1  11  104.58    2.84
   0  -1  11  104.43    2.84
   0  -1  11  107.57    3.30
   0   1 -11  108.01    5.50
   0   1  11  106.58    3.13
   0   1  11  106.37    3.48
   0   1  11  106.34    2.87
  -1  -1 -11    0.14    1.10
   1  -1  11    1.21    1.20
   1  -1  11    0.68    1.29
  -1  -1 -11    1.88    1.75
   1  -1  11    2.35    1.41
   1   1  11    1.63    1.50
  -1   1 -11    3.96    2.15
   1   1  11    0.24    1.09
   1   1  11    0.18    0.62
  -2  -1 -11   22.94    2.27
   2  -1  11   23.25    2.14
   2  -1  11   21.62    1.68
   2  -1  11   23.09    2.18
  -2  -1 -11   21.49    3.25
  -2   1 -11   22.99    1.98
   2   1  11   21.10    1.82
  -2   1 -11   20.94    3.87
   2   1  11   23.87    2.11
   3  -1  11   25.87    3.05
   3  -1  11   23.84    2.38
  -3  -1 -11   30.41    4.09
   3  -1  11   27.58    2.38
   3   1  11   27.43    2.99
   3   1  11   29.53    2.30
   3   1  11   24.60    2.57
  -3   1 -11   29.68    5.11
   4  -1  11   -1.37    1.43
   4  -1  11   -2.34    2.45
  -4  -1 -11    5.86    3.34
  -4   1 -11    6.76    3.49
   4   1  11   -2.15    2.63
  -4  -2  11    0.51    1.81
   4  -2 -11    0.30    1.29
   4   2 -11   -0.83    1.50
  -4   2  11   -1.26    3.26
   4   2 -11    4.16    2.76
  -4   2  11   -0.27    1.61
  -3  -2  11    9.38    1.98
   3  -2 -11    7.90    1.19
   3  -2 -11    7.41    1.46
  -3   2  11    9.17    1.96
  -3   2  11    9.67    1.33
  -3   2  11    8.22    2.65
   3   2 -11    8.15    1.69
   3   2 -11    7.23    2.27
  -2  -2  11   15.01    2.06
   2  -2 -11   12.90    2.09
  -2  -2  11   14.34    1.53
   2  -2 -11   14.86    1.58
   2   2 -11   16.87    1.89
  -2   2  11   15.25    2.07
  -2   2  11   14.78    1.39
   2   2 -11   15.03    2.58
   2   2 -11   14.83    0.76
  -2   2  11   15.29    1.57
  -1  -2  11  194.26    3.61
  -1  -2  11  185.87    4.75
  -1  -2  11  181.27    3.83
   1  -2 -11  195.40    6.03
  -1   2  11  187.17    4.01
  -1   2  11  187.92    4.20
  -1   2  11  190.32    4.94
   1   2 -11  189.65    4.73
   1   2 -11  199.53    6.76
   0  -2  11   25.89    1.93
   0  -2  11   25.64    1.79
   0  -2 -11   28.07    3.36
   0  -2  11   25.23    1.60
   0   2  11   25.20    1.80
   0   2  11   26.14    2.17
   0   2 -11   30.43    4.29
   0   2  11   25.55    2.17
  -1  -2 -11   93.20    3.22
   1  -2  11   96.12    2.57
   1  -2  11   94.60    3.07
  -1  -2 -11   91.12    3.90
   1  -2  11   94.53    3.01
   1  -2  11   95.92    2.81
   1   2  11   90.04    3.10
   1   2  11   91.56    2.78
   1   2  11   96.00    2.81
  -1   2 -11   86.89    5.01
  -2  -2 -11    0.03    1.62
   2  -2  11    0.53    1.37
  -2  -2 -11    0.31    1.50
   2  -2  11    0.48    0.71
   2  -2  11    1.11    1.60
   2   2  11   -0.30    0.87
   2   2  11    1.16    2.01
   2   2  11    1.15    1.28
  -2   2 -11   -0.97    2.49
  -2   2 -11    0.04    1.20
   3  -2  11    1.51    1.13
   3  -2  11    1.78    1.52
  -3  -2 -11    2.78    2.06
   3  -2  11    2.71    2.16
  -3  -2 -11    2.47    1.98
  -3   2 -11    4.75    3.01
   3   2  11    0.77    1.32
   3   2  11    3.32    1.39
   3   2  11    2.01    2.42
   4  -2  11   -3.21    2.21
   4  -2  11   -1.31    1.27
  -4  -2 -11    4.09    3.10
   4   2  11   -1.50    2.77
  -4   2 -11    7.90    4.17
  -4  -3  11    1.76    1.90
   4  -3 -11   -0.06    1.30
   4   3 -11    1.50    2.88
  -4   3  11   -0.34    3.39
   4   3 -11   -2.05    1.57
  -3  -3  11   18.13    2.40
   3  -3 -11   14.97    2.05
   3  -3 -11   15.49    1.40
  -3   3  11   16.86    1.75
   3   3 -11   16.55    2.48
  -3   3  11   16.53    2.22
  -3   3  11   17.49    3.09
   3   3 -11   16.54    3.36
  -2  -3  11   19.23    1.63
  -2  -3  11   19.91    2.20
   2   3 -11   20.14    2.89
  -2   3  11   18.67    1.78
  -2   3  11   21.29    1.66
  -2   3  11   20.41    2.22
   2   3 -11   19.96    2.10
   1  -3 -11  117.28    4.25
  -1  -3  11  118.70    2.29
  -1  -3  11  113.78    2.88
  -1   3  11  114.30    3.22
  -1   3  11  112.66    3.04
   1   3 -11  112.28    3.50
   1   3 -11  117.31    5.29
  -1   3  11  116.07    3.81
   0  -3  11   45.20    2.28
   0  -3 -11   49.15    3.46
   0  -3  11   46.54    1.83
   0  -3  11   46.92    1.96
   0   3 -11   50.42    5.02
   0   3  11   47.02    2.45
   0   3  11   48.31    2.68
   0   3  11   48.02    2.13
  -1  -3 -11    9.93    1.63
   1  -3  11    9.30    1.52
   1  -3  11    9.82    1.47
  -1  -3 -11   10.81    2.16
   1  -3  11   10.66    1.49
   1   3  11   13.69    2.07
   1   3  11    9.15    1.41
  -1   3 -11   11.38    2.89
   1   3  11   10.10    1.72
   2  -3  11    3.57    0.89
   2  -3  11    3.93    1.65
   2  -3  11    3.94    1.50
  -2  -3 -11    3.92    1.67
  -2  -3 -11    4.29    1.69
   2   3  11    4.98    2.03
   2   3  11    3.01    1.19
  -2   3 -11    4.47    1.26
   2   3  11    4.22    1.33
  -2   3 -11    2.62    2.93
   3  -3  11    2.98    2.11
  -3  -3 -11    4.10    1.98
   3  -3  11    1.85    1.14
  -3  -3 -11    1.00    1.84
   3  -3  11    3.20    1.55
   3   3  11    1.10    1.26
   3   3  11    3.46    2.58
  -3   3 -11    4.03    3.17
   3   3  11    0.02    1.40
   4  -3  11   -4.58    2.37
  -4  -3 -11    2.56    2.64
   4  -3  11   -1.22    1.36
   4   3  11   -4.24    2.71
  -4   3 -11    6.85    4.24
  -4  -4  11    5.34    2.22
   4  -4 -11    3.78    1.61
   4  -4 -11    6.67    1.50
   4   4 -11    8.69    3.55
  -4   4  11    5.45    3.99
   4   4 -11    3.81    2.03
   3  -4 -11   97.62    4.21
  -3  -4  11   99.45    4.12
   3  -4 -11   97.65    3.11
   3   4 -11  106.81    4.82
   3   4 -11  100.47    5.73
  -3   4  11  101.54    5.69
  -3   4  11   97.61    3.00
  -3   4  11   98.94    3.78
  -2  -4  11    4.03    1.13
  -2  -4  11    3.66    1.61
   2   4 -11    4.49    1.40
  -2   4  11    6.17    1.42
   2   4 -11    3.86    1.87
  -2   4  11    3.73    1.67
  -2   4  11    3.33    1.61
  -2   4  11    4.08    1.22
  -1  -4  11    0.56    1.03
   1  -4 -11    0.28    1.02
  -1  -4  11   -0.01    1.10
  -1   4  11   -0.16    1.02
   1   4 -11    1.17    1.18
   1   4 -11    1.07    2.10
  -1   4  11    0.92    1.30
  -1   4  11    1.55    1.50
   0  -4 -11   14.21    2.79
   0  -4  11    9.65    1.63
   0  -4  11   10.85    1.42
   0  -4  11    9.57    1.23
   0   4  11   11.11    1.43
   0   4 -11   11.93    3.16
   0   4  11   11.91    1.88
  -1  -4 -11   85.50    3.17
   1  -4  11   86.50    2.75
   1  -4  11   86.57    2.83
   1  -4  11   87.36    2.84
  -1  -4 -11   85.46    3.22
   1   4  11   85.62    3.16
   1   4  11   83.40    3.43
   1   4  11   87.00    2.77
  -1   4 -11   76.30    5.64
   2  -4  11   21.10    2.16
   2  -4  11   23.10    2.19
  -2  -4 -11   21.46    2.69
  -2  -4 -11   19.06    2.47
  -2   4 -11   21.34    3.65
   2   4  11   18.86    1.99
   2   4  11   19.77    2.23
  -2   4 -11   21.18    1.75
   2   4  11   21.98    3.02
   3  -4  11   20.14    2.26
  -3  -4 -11   20.45    2.83
   3  -4  11   19.97    2.73
   3  -4  11   23.15    2.44
  -3  -4 -11   24.64    3.19
   3   4  11   22.68    3.42
   3   4  11   21.66    1.95
  -3   4 -11   28.91    5.42
   3   4  11   18.74    2.84
   4  -4  11   -0.73    2.42
  -4  -4 -11    7.68    2.72
   4  -4  11    1.94    1.53
   4   4  11    0.93    3.04
   4  -5 -11    2.90    1.30
   4  -5 -11    3.44    1.48
  -4  -5  11    5.26    2.22
   4   5 -11    1.15    1.99
   4   5 -11    6.08    3.43
  -4   5  11    2.50    3.62
  -3  -5  11   44.63    3.30
   3  -5 -11   42.31    2.17
   3   5 -11   42.10    4.38
  -3   5  11   45.47    2.99
  -3   5  11   42.98    4.00
  -3   5  11   44.56    2.26
   3   5 -11   44.06    3.49
  -2  -5  11   10.92    1.51
  -2  -5  11   12.22    2.14
  -2   5  11   11.68    1.52
  -2   5  11   10.42    1.94
  -2   5  11   12.88    2.10
  -2   5  11    9.85    1.64
   2   5 -11   14.04    2.44
   2   5 -11   13.55    2.75
  -1  -5  11   32.64    1.84
  -1  -5  11   32.08    2.27
   1  -5 -11   32.37    2.14
  -1   5  11   31.28    2.00
   1   5 -11   34.67    3.95
   1   5 -11   34.38    2.65
  -1   5  11   33.30    2.59
  -1   5  11   31.96    2.26
   0  -5 -11  122.43    4.23
   0  -5 -11  117.65    3.72
   0  -5  11  127.15    3.62
   0  -5  11  123.36    2.86
   0  -5  11  125.26    3.24
   0   5  11  124.56    3.84
   0   5 -11  116.93    6.69
   0   5  11  123.07    3.21
   1  -5  11   15.18    1.99
   1  -5  11   13.57    1.71
  -1  -5 -11   14.44    1.97
  -1  -5 -11   16.52    1.51
   1  -5  11   15.33    1.65
   1   5  11   16.22    2.65
  -1   5 -11   15.75    3.55
   1   5  11   13.77    1.78
   1   5  11   18.90    2.63
  -2  -5 -11   47.78    3.13
   2  -5  11   50.77    2.80
   2  -5  11   50.19    2.76
  -2  -5 -11   49.28    2.81
   2   5  11   48.04    3.14
  -2   5 -11   44.95    5.46
   2   5  11   51.36    3.62
   2   5  11   50.50    2.42
  -3  -5 -11   22.88    2.95
   3  -5  11   18.17    2.69
   3  -5  11   18.52    2.11
   3  -5  11   17.48    2.40
  -3  -5 -11   19.40    3.01
   3   5  11   18.14    3.05
   3   5  11   22.25    3.34
  -3   5 -11   26.63    5.66
   4  -5  11    1.03    1.41
   4  -5  11   -3.73    2.24
  -4   5 -11   12.52    5.47
   4   5  11   -3.11    2.79
  -4  -6  11    7.67    2.55
   4  -6 -11    5.73    1.50
   4  -6 -11    3.86    1.50
   4   6 -11    1.90    2.19
  -4   6  11    7.60    3.99
   4   6 -11    6.54    3.63
   3  -6 -11    9.37    1.47
  -3  -6  11   10.14    2.35
  -3   6  11   10.62    2.09
   3   6 -11    8.37    2.73
   3   6 -11    6.91    2.07
  -3   6  11    7.53    2.33
  -2  -6  11    0.06    1.51
  -2  -6  11    1.76    1.12
  -2   6  11    0.61    1.39
  -2   6  11    0.76    1.21
  -2   6  11    0.46    1.33
  -2   6  11    2.94    1.80
   2   6 -11    0.71    2.07
   2   6 -11    2.01    1.53
  -1  -6  11   38.02    1.98
   1  -6 -11   40.42    2.23
  -1  -6  11   33.92    2.44
   1   6 -11   42.62    3.38
   1   6 -11   42.64    4.36
  -1   6  11   37.26    2.39
  -1   6  11   36.71    2.12
   0  -6  11   24.55    1.80
   0  -6 -11   26.05    2.55
   0  -6 -11   20.52    2.24
   0  -6  11   23.47    1.34
   0  -6  11   22.82    1.91
   0   6  11   21.82    1.86
   0   6 -11   28.82    5.30
   0   6  11   22.66    2.46
   1  -6  11    1.32    1.39
   1  -6  11    1.51    1.13
  -1  -6 -11    2.42    1.71
   1  -6  11    0.96    1.17
  -1  -6 -11    1.13    0.67
   1   6  11    1.61    2.14
   1   6  11    3.13    1.79
  -1   6 -11    0.78    3.44
   1   6  11    0.31    1.14
   2  -6  11    4.72    1.58
  -2  -6 -11    3.80    1.26
  -2  -6 -11    4.76    2.14
   2  -6  11    4.50    1.60
   2   6  11    5.85    2.53
   2   6  11    3.51    1.71
   2   6  11    3.74    1.38
  -2   6 -11    1.64    3.33
   3  -6  11   16.57    2.57
  -3  -6 -11   17.60    2.78
   3  -6  11   17.94    2.45
  -3   6 -11   27.08    5.12
   3   6  11   11.60    2.29
   3   6  11   17.20    3.11
   4  -6  11    0.85    1.42
   4  -6  11   -3.98    2.19
   4   6  11   -2.60    2.98
  -4   6 -11   15.41    6.07
  -4  -7  11    2.30    2.34
   4  -7 -11    0.25    1.24
   4  -7 -11    0.15    1.13
   4   7 -11   -2.49    2.12
   4   7 -11   -1.90    3.09
  -4   7  11   -1.07    3.26
   3  -7 -11    5.71    1.21
  -3  -7  11    6.02    2.26
   3   7 -11    4.21    2.10
  -3   7  11    4.83    2.09
  -3   7  11    4.92    1.95
   3   7 -11    5.20    2.69
  -2  -7  11   33.45    1.91
  -2  -7  11   29.79    2.54
   2   7 -11   35.14    4.32
  -2   7  11   32.50    2.20
  -2   7  11   31.57    2.69
  -2   7  11   32.77    2.81
  -2   7  11   30.10    2.31
   2   7 -11   35.01    3.38
   1  -7 -11   14.04    2.08
  -1  -7  11   12.36    1.74
  -1  -7  11   12.66    1.89
   1  -7 -11   13.84    1.54
   1   7 -11   20.71    3.81
   1   7 -11   15.09    3.38
  -1   7  11   15.64    2.14
  -1   7  11   13.37    1.91
   0  -7  11   75.20    2.75
   0  -7  11   75.75    2.88
   0  -7 -11   70.34    3.23
   0  -7  11   73.26    2.14
   0   7 -11   70.66    6.62
   0   7  11   72.13    3.23
   0   7  11   76.84    2.79
   1  -7  11    6.49    1.41
   1  -7  11    6.96    1.60
  -1  -7 -11    6.90    1.94
   1  -7  11    6.00    1.30
   1   7  11    5.15    1.38
   1   7  11    6.15    2.26
   1   7  11    7.78    2.42
  -1   7 -11    8.04    3.90
   2  -7  11   10.18    1.88
  -2  -7 -11   10.46    2.44
   2  -7  11   10.96    1.90
  -2   7 -11    9.45    3.76
   2   7  11   12.97    2.90
   2   7  11   11.17    2.15
   2   7  11   10.35    1.63
   3  -7  11   -0.18    1.61
   3  -7  11   -1.41    1.80
  -3  -7 -11   -0.47    2.32
   3   7  11    2.28    2.84
   3   7  11   -1.90    1.81
  -3   7 -11    5.63    4.20
   4  -7  11    1.23    1.34
   4   7  11   -4.69    3.07
  -4  -8  11    4.45    2.54
   4  -8 -11    0.64    1.33
  -4   8  11    1.98    3.52
   4   8 -11   -0.56    3.32
   4   8 -11   -2.69    2.33
   3  -8 -11   11.20    1.48
  -3  -8  11   12.45    2.62
   3   8 -11    8.48    2.47
  -3   8  11   11.76    2.45
   3   8 -11   11.69    3.47
  -2  -8  11    0.13    1.89
   2  -8 -11    0.38    1.61
  -2  -8  11    1.99    1.20
  -2   8  11    0.89    1.35
   2   8 -11    3.54    2.07
  -2   8  11    0.71    1.66
  -2   8  11    2.19    1.44
   2   8 -11    1.47    2.67
  -1  -8  11   12.19    2.00
  -1  -8  11   13.34    1.59
   1  -8 -11   13.38    2.17
  -1   8  11   11.69    1.61
   1   8 -11   16.32    3.75
   1   8 -11   24.25    4.62
  -1   8  11   13.13    2.10
   0  -8  11   17.25    2.05
   0  -8  11   16.05    1.99
   0  -8  11   16.27    1.24
   0  -8 -11   16.37    2.60
   0   8  11   16.50    1.83
   0   8  11   18.55    2.44
   0   8 -11   17.77    4.11
   1  -8  11   46.10    2.55
  -1  -8 -11   48.45    3.28
   1  -8  11   43.58    2.03
   1  -8  11   46.05    2.34
  -1   8 -11   53.52    7.16
   1   8  11   45.46    2.41
   1   8  11   45.16    3.44
   1   8  11   50.59    4.64
   2  -8  11    2.60    1.65
  -2  -8 -11    0.14    2.32
   2  -8  11    1.65    1.49
  -2   8 -11   -0.13    3.42
   2   8  11   -0.10    1.34
   2   8  11    2.53    2.04
   2   8  11    3.09    2.64
   3  -8  11   18.08    2.63
   3  -8  11   15.95    2.14
  -3  -8 -11   16.06    2.97
  -3   8 -11   24.70    5.40
   3   8  11   18.51    3.29
   4  -8  11    2.03    2.51
   4  -8  11    6.39    1.77
   4   8  11    1.20    3.36
   4  -9 -11   10.86    1.96
  -4  -9  11   15.37    3.06
  -4   9  11   10.70    3.83
   4   9 -11    4.84    3.71
   3  -9 -11    0.69    1.09
  -3  -9  11    3.00    2.32
   3  -9 -11    3.64    1.80
   3   9 -11   -0.35    2.34
  -3   9  11    1.06    1.78
   3   9 -11    0.75    2.85
  -3   9  11    1.25    1.72
  -2  -9  11   23.14    3.01
  -2  -9  11   25.92    2.01
   2  -9 -11   21.91    2.69
  -2   9  11   25.99    2.48
[truncated: 224,782 more chars]
